# Supplementary material for: Instantaneous movement-unrelated midbrain activity modifies ongoing eye movements
Source: eLife. 2021 May 6;10:e64150. doi: 10.7554/eLife.64150 (PMC8143798; doi:10.7554/eLife.64150)
Supplement: Figure 1—figure supplement 1—source data 1. [file elife-64150-fig1-figsupp1-data1.xlsx]

## Sheet: A - Toward RF - VM neurons
time	mean	low95CI	up95CI
-50	2.96914	1.50128	4.43699
-49	2.95664	1.49147	4.4218
-48	2.94332	1.48247	4.40416
-47	2.92869	1.47344	4.38393
-46	2.91489	1.4655	4.36428
-45	2.90047	1.45723	4.34371
-44	2.88533	1.44964	4.32102
-43	2.87098	1.44195	4.30001
-42	2.85638	1.43438	4.27838
-41	2.84449	1.42741	4.26157
-40	2.83375	1.42139	4.24611
-39	2.82455	1.41504	4.23407
-38	2.81563	1.40843	4.22283
-37	2.80859	1.40201	4.21518
-36	2.80347	1.39613	4.21082
-35	2.79975	1.3907	4.20879
-34	2.79713	1.38451	4.20975
-33	2.7959	1.37836	4.21345
-32	2.79566	1.37255	4.21877
-31	2.79561	1.36623	4.22499
-30	2.79587	1.35989	4.23184
-29	2.79567	1.35326	4.23809
-28	2.79405	1.34566	4.24243
-27	2.79068	1.33693	4.24444
-26	2.78685	1.32801	4.24568
-25	2.78079	1.31775	4.24383
-24	2.77354	1.30731	4.23978
-23	2.76257	1.29515	4.22998
-22	2.74825	1.28204	4.21447
-21	2.73168	1.26791	4.19546
-20	2.71386	1.25425	4.17347
-19	2.69286	1.2394	4.14632
-18	2.66897	1.22318	4.11476
-17	2.64625	1.20821	4.08428
-16	2.6209	1.19236	4.04943
-15	2.5939	1.17628	4.01151
-14	2.56753	1.16055	3.9745
-13	2.54137	1.14465	3.93809
-12	2.51515	1.12882	3.90148
-11	2.48974	1.11362	3.86586
-10	2.46506	1.0986	3.83152
-9	2.44282	1.08431	3.80134
-8	2.42127	1.07041	3.77213
-7	2.40248	1.05716	3.74781
-6	2.38485	1.04398	3.72572
-5	2.3695	1.03168	3.70732
-4	2.3536	1.01869	3.6885
-3	2.33881	1.00694	3.67068
-2	2.32506	0.995093	3.65502
-1	2.31177	0.983621	3.63992
0	2.29898	0.973377	3.62458
1	2.28421	0.962113	3.6063
2	2.26873	0.95115	3.58631
3	2.25147	0.940536	3.56241
4	2.23251	0.929576	3.53543
5	2.21194	0.919055	3.50483
6	2.18928	0.908191	3.47036
7	2.16499	0.897786	3.4322
8	2.13898	0.8879	3.39007
9	2.11251	0.8784	3.34662
10	2.08461	0.869173	3.30005
11	2.05542	0.86037	3.25047
12	2.02732	0.852964	3.20167
13	1.99955	0.845919	3.15317
14	1.97331	0.840891	3.10572
15	1.94982	0.837107	3.06253
16	1.92761	0.834688	3.02053
17	1.90917	0.83384	2.98449
18	1.89369	0.834686	2.9527
19	1.88135	0.836483	2.92621
20	1.87325	0.840763	2.90574
21	1.86975	0.846531	2.89296
22	1.86986	0.853551	2.88617
23	1.87379	0.861672	2.88591
24	1.88106	0.870601	2.89152
25	1.89246	0.88085	2.90407
26	1.90634	0.891055	2.92163
27	1.92471	0.903346	2.94607
28	1.94497	0.915493	2.97445
29	1.96615	0.927112	3.00519
30	1.98917	0.938326	3.04001
31	2.01225	0.949699	3.0748
32	2.03665	0.961379	3.11193
33	2.06031	0.972295	3.14833
34	2.08398	0.983876	3.18409
35	2.10672	0.994858	3.21859
36	2.13034	1.0061	3.25458
37	2.15382	1.01812	3.28953
38	2.17566	1.02968	3.32164
39	2.19441	1.0404	3.34842
40	2.2132	1.05224	3.37415
41	2.23245	1.06558	3.39932
42	2.24954	1.07942	3.41967
43	2.26838	1.09572	3.44104
44	2.28719	1.11364	3.46075
45	2.30586	1.13253	3.4792
46	2.3251	1.1543	3.49591
47	2.34689	1.17901	3.51477
48	2.37101	1.20602	3.536
49	2.39809	1.23631	3.55987
50	2.42882	1.27078	3.58686

## Sheet: A - Toward RF - V neurons
time	mean	low95CI	up95CI
-50	1.23696	0.259368	2.21455
-49	1.23092	0.254491	2.20736
-48	1.22495	0.250165	2.19973
-47	1.21929	0.246695	2.19188
-46	1.21291	0.242652	2.18318
-45	1.20559	0.238365	2.17281
-44	1.19983	0.234757	2.1649
-43	1.19304	0.231601	2.15447
-42	1.18712	0.228386	2.14586
-41	1.18211	0.225775	2.13844
-40	1.17771	0.223669	2.13175
-39	1.17413	0.222463	2.1258
-38	1.17127	0.221662	2.12088
-37	1.16908	0.221447	2.11672
-36	1.16836	0.222161	2.11456
-35	1.16781	0.223454	2.11217
-34	1.1679	0.224957	2.11084
-33	1.16929	0.227245	2.11134
-32	1.17112	0.230378	2.11186
-31	1.17374	0.233764	2.11371
-30	1.17615	0.237391	2.11492
-29	1.17787	0.240572	2.11516
-28	1.17935	0.243883	2.11482
-27	1.18053	0.247062	2.114
-26	1.18098	0.249936	2.11202
-25	1.18178	0.252497	2.11107
-24	1.18195	0.254449	2.10946
-23	1.18134	0.255887	2.10679
-22	1.18081	0.257368	2.10424
-21	1.17981	0.258591	2.10103
-20	1.17883	0.259691	2.09796
-19	1.17785	0.2603	2.09539
-18	1.1768	0.261052	2.09255
-17	1.17602	0.262322	2.08971
-16	1.17527	0.263531	2.08701
-15	1.17497	0.264785	2.08515
-14	1.17528	0.26697	2.08359
-13	1.17589	0.269179	2.08261
-12	1.17718	0.272293	2.08207
-11	1.17787	0.275348	2.08039
-10	1.17948	0.279579	2.07938
-9	1.18089	0.284008	2.07776
-8	1.18149	0.288656	2.07433
-7	1.18166	0.293637	2.06968
-6	1.18144	0.298524	2.06435
-5	1.18021	0.303999	2.05643
-4	1.17762	0.309083	2.04615
-3	1.17374	0.314217	2.03326
-2	1.16828	0.319182	2.01738
-1	1.16056	0.323359	1.99775
0	1.15146	0.327206	1.9757
1	1.14159	0.330402	1.95277
2	1.12952	0.333135	1.9259
3	1.11623	0.334832	1.89762
4	1.10124	0.335225	1.86725
5	1.08468	0.334306	1.83505
6	1.06634	0.332517	1.80017
7	1.04825	0.329431	1.76707
8	1.02958	0.325163	1.73401
9	1.01038	0.319563	1.7012
10	0.991142	0.313098	1.66919
11	0.971473	0.305658	1.63729
12	0.952044	0.297163	1.60693
13	0.934452	0.289633	1.57927
14	0.916989	0.281077	1.5529
15	0.900135	0.27261	1.52766
16	0.884373	0.263962	1.50478
17	0.869863	0.255625	1.4841
18	0.856891	0.247729	1.46605
19	0.84526	0.240686	1.44983
20	0.834709	0.233844	1.43557
21	0.825639	0.227636	1.42364
22	0.818273	0.222338	1.41421
23	0.812095	0.218068	1.40612
24	0.809275	0.215226	1.40332
25	0.807786	0.213246	1.40233
26	0.807304	0.212086	1.40252
27	0.808508	0.211471	1.40555
28	0.812724	0.21236	1.41309
29	0.818289	0.214207	1.42237
30	0.826079	0.217218	1.43494
31	0.834975	0.220433	1.44952
32	0.846851	0.225499	1.4682
33	0.860811	0.231719	1.4899
34	0.876477	0.238754	1.5142
35	0.894526	0.247769	1.54128
36	0.916384	0.258788	1.57398
37	0.940056	0.271039	1.60907
38	0.969008	0.286233	1.65178
39	0.999506	0.302162	1.69685
40	1.03412	0.321612	1.74662
41	1.075	0.346446	1.80356
42	1.12004	0.374443	1.86563
43	1.17276	0.409328	1.93619
44	1.23133	0.448115	2.01455
45	1.29749	0.494673	2.10032
46	1.37095	0.547228	2.19468
47	1.45462	0.608377	2.30087
48	1.54899	0.678714	2.41927
49	1.65308	0.756409	2.54975
50	1.77029	0.844224	2.69636

## Sheet: B - Opposite RF - VM neurons
time	mean	low95CI	up95CI
-50	2.77523	1.53186	4.0186
-49	2.76515	1.52393	4.00637
-48	2.75273	1.51359	3.99187
-47	2.73895	1.50169	3.97622
-46	2.72362	1.4881	3.95914
-45	2.70636	1.47283	3.93989
-44	2.68796	1.45626	3.91966
-43	2.66943	1.43901	3.89985
-42	2.64989	1.42067	3.8791
-41	2.63061	1.40244	3.85877
-40	2.61171	1.38416	3.83927
-39	2.59233	1.36505	3.81961
-38	2.57288	1.34613	3.79962
-37	2.55437	1.32811	3.78063
-36	2.53681	1.31049	3.76312
-35	2.51968	1.29397	3.74539
-34	2.50434	1.27862	3.73005
-33	2.49077	1.26572	3.71583
-32	2.47678	1.25295	3.7006
-31	2.46352	1.24163	3.68541
-30	2.451	1.23133	3.67066
-29	2.43926	1.22201	3.6565
-28	2.42843	1.21381	3.64304
-27	2.41814	1.20695	3.62933
-26	2.40796	1.20041	3.6155
-25	2.39796	1.19449	3.60143
-24	2.38805	1.18923	3.58686
-23	2.37837	1.18392	3.57282
-22	2.36786	1.1788	3.55693
-21	2.35835	1.17401	3.54268
-20	2.34758	1.16859	3.52658
-19	2.3363	1.16309	3.5095
-18	2.32339	1.15693	3.48984
-17	2.31151	1.15082	3.4722
-16	2.29812	1.14339	3.45285
-15	2.28358	1.1353	3.43186
-14	2.26792	1.12617	3.40967
-13	2.25185	1.11662	3.38709
-12	2.23369	1.10527	3.36212
-11	2.21394	1.09248	3.33539
-10	2.19234	1.0785	3.30618
-9	2.16982	1.06327	3.27637
-8	2.14575	1.0471	3.2444
-7	2.12075	1.03017	3.21133
-6	2.09512	1.0119	3.17835
-5	2.06665	0.992058	3.14124
-4	2.0371	0.971477	3.10273
-3	2.00575	0.949649	3.06186
-2	1.97362	0.927292	3.01995
-1	1.93981	0.903856	2.97576
0	1.90474	0.880139	2.92933
1	1.86961	0.856485	2.88273
2	1.83419	0.833067	2.83532
3	1.79842	0.810139	2.78669
4	1.76252	0.787417	2.73762
5	1.72659	0.765548	2.68763
6	1.69123	0.744499	2.63795
7	1.65727	0.725337	2.58921
8	1.62449	0.707869	2.5411
9	1.59255	0.691239	2.49386
10	1.56243	0.676125	2.44874
11	1.53474	0.663136	2.40635
12	1.50858	0.651804	2.36535
13	1.48454	0.641837	2.32724
14	1.46337	0.633155	2.29359
15	1.44581	0.627127	2.26448
16	1.43067	0.622104	2.23924
17	1.4185	0.619109	2.21789
18	1.40858	0.617057	2.2001
19	1.4015	0.616184	2.18681
20	1.39825	0.617445	2.17905
21	1.39762	0.620426	2.17481
22	1.39891	0.623595	2.17422
23	1.404	0.628525	2.17947
24	1.41125	0.634742	2.18775
25	1.42033	0.642025	2.19864
26	1.4316	0.650557	2.21264
27	1.44577	0.66089	2.23066
28	1.46249	0.672735	2.25225
29	1.48016	0.685569	2.27476
30	1.49948	0.700241	2.29872
31	1.52079	0.716604	2.32498
32	1.54354	0.73412	2.35295
33	1.568	0.752979	2.38302
34	1.59435	0.774326	2.41437
35	1.62177	0.796726	2.44682
36	1.64901	0.819652	2.47837
37	1.67866	0.844668	2.51265
38	1.70885	0.870452	2.54725
39	1.73996	0.897292	2.58262
40	1.77204	0.925318	2.61877
41	1.80525	0.954501	2.65601
42	1.83713	0.982853	2.69141
43	1.87172	1.01358	2.72985
44	1.90548	1.04365	2.76731
45	1.93973	1.0742	2.80526
46	1.97424	1.10525	2.84322
47	2.01037	1.13801	2.88272
48	2.04927	1.1731	2.92544
49	2.08793	1.20771	2.96814
50	2.12831	1.24341	3.01321

## Sheet: B - Opposite RF - V neurons
time	mean	low95CI	up95CI
-50	1.70952	0.584936	2.8341
-49	1.73779	0.60408	2.87151
-48	1.76429	0.621255	2.90733
-47	1.78783	0.638066	2.9376
-46	1.80946	0.651295	2.96762
-45	1.82738	0.662359	2.9924
-44	1.83978	0.670164	3.0094
-43	1.84793	0.675055	3.0208
-42	1.85335	0.677433	3.02927
-41	1.85338	0.676635	3.03013
-40	1.84799	0.672502	3.02348
-39	1.838	0.665433	3.01056
-38	1.82465	0.655628	2.99366
-37	1.80537	0.642316	2.96843
-36	1.782	0.626567	2.93743
-35	1.75487	0.607843	2.9019
-34	1.72485	0.587613	2.86209
-33	1.68996	0.564185	2.81573
-32	1.65349	0.540049	2.76693
-31	1.61565	0.514789	2.7165
-30	1.57498	0.488234	2.66173
-29	1.53583	0.46054	2.61111
-28	1.49525	0.43342	2.55707
-27	1.4569	0.406456	2.50734
-26	1.41877	0.379389	2.45814
-25	1.38381	0.353838	2.41379
-24	1.3513	0.329334	2.37327
-23	1.32097	0.307377	2.33457
-22	1.29551	0.286201	2.30483
-21	1.27315	0.267325	2.27897
-20	1.25537	0.24946	2.26127
-19	1.24069	0.23442	2.24697
-18	1.23117	0.22045	2.24188
-17	1.22549	0.207908	2.24308
-16	1.22308	0.196939	2.24922
-15	1.2237	0.186694	2.26071
-14	1.22824	0.179078	2.27741
-13	1.23365	0.171773	2.29553
-12	1.24338	0.166552	2.32021
-11	1.25459	0.162107	2.34708
-10	1.26739	0.161681	2.37309
-9	1.28062	0.161919	2.39931
-8	1.29248	0.162424	2.42254
-7	1.30291	0.165678	2.44013
-6	1.31469	0.171172	2.45821
-5	1.32365	0.178523	2.46877
-4	1.33038	0.186254	2.47452
-3	1.33482	0.196003	2.47364
-2	1.3373	0.205826	2.46878
-1	1.33767	0.217235	2.4581
0	1.33501	0.227431	2.44258
1	1.33042	0.23706	2.42378
2	1.32368	0.246751	2.40061
3	1.31575	0.257315	2.37418
4	1.30559	0.266325	2.34486
5	1.29386	0.273998	2.31373
6	1.28161	0.282199	2.28102
7	1.27005	0.289248	2.25085
8	1.25771	0.29627	2.21915
9	1.24595	0.30247	2.18943
10	1.2348	0.307976	2.16163
11	1.22406	0.312783	2.13533
12	1.21477	0.317535	2.112
13	1.2069	0.321569	2.09224
14	1.1994	0.325301	2.07351
15	1.19422	0.329165	2.05928
16	1.18979	0.33216	2.04742
17	1.18622	0.335182	2.03726
18	1.1839	0.337745	2.03005
19	1.18325	0.33966	2.02684
20	1.18184	0.340881	2.0228
21	1.18135	0.341064	2.02163
22	1.18205	0.342315	2.02179
23	1.18336	0.342132	2.02458
24	1.18358	0.342024	2.02514
25	1.18465	0.341392	2.0279
26	1.18537	0.340615	2.03012
27	1.18643	0.339828	2.03303
28	1.18627	0.339001	2.03354
29	1.18713	0.33866	2.03559
30	1.18716	0.338372	2.03596
31	1.18773	0.338202	2.03726
32	1.1876	0.338292	2.03691
33	1.18753	0.33941	2.03565
34	1.1891	0.341533	2.03667
35	1.19158	0.34496	2.03821
36	1.19602	0.350112	2.04192
37	1.20216	0.356694	2.04763
38	1.21133	0.365036	2.05763
39	1.22085	0.374639	2.06707
40	1.23496	0.387123	2.08279
41	1.25209	0.402456	2.10172
42	1.27488	0.421982	2.12778
43	1.30186	0.445566	2.15816
44	1.33346	0.47296	2.19396
45	1.37033	0.505114	2.23554
46	1.41776	0.548068	2.28744
47	1.46973	0.594898	2.34457
48	1.53383	0.653047	2.41462
49	1.60763	0.720346	2.49492
50	1.69067	0.796279	2.58507
