# Supplementary material for: Instantaneous movement-unrelated midbrain activity modifies ongoing eye movements
Source: eLife. 2021 May 6;10:e64150. doi: 10.7554/eLife.64150 (PMC8143798; doi:10.7554/eLife.64150)
Supplement: Figure 1—source data 1. [file elife-64150-fig1-data1.xlsx]

## Sheet: C - Polar plot
rho	theta	task	task legend
6.7	0.6	1	1=spatial frequency task
8.8	0.5	1	2=constast and spatial frequency task
7	0.8	1	3=contrast tast
1.6	0.9	1
0.7	1	1
1.1	0.6	1
3.8	-1.5	1
2.4	-0.9	1
2.3	-0.6	1
4.9	0.4	1
4.2	0.7	1
4.9	0.6	1
2.6	0.6	1
0.6	-0.3	1
6.8	0.2	1
0.9	-1.3	1
0.9	-1.3	1
2.2	-0.8	1
1.4	-0.1	1
0.6	0.2	1
4	0.9	1
7.5	0.2	1
8.8	0.1	1
0.5	0.4	1
0.3	0	1
0.5	0.8	1
4.4	0.1	1
0.4	-1.2	1
1.7	-0.1	1
0.2	0.6	1
0.6	-0.6	1
1.8	-0.6	1
0.2	-1.4	1
6	0.5	1
5.3	0.5	1
9	0	1
4.9	0.8	1
1.1	-0.4	1
5	0.6	1
10.4	0.6	1
1.9	-1	1
1.4	-0.5	1
2.4	-1.2	1
10.4	-0.8	1
6.4	0.6	2
0.8	0.8	2
1	0.6	2
1	0.4	2
0.6	0.2	2
4.8	0	2
4.7	1.1	2
5.2	-0.3	2
2.9	-0.3	2
6.5	-0.3	2
5.2	-0.2	2
4.3	0.3	3
17.2	-0.4	3
6.7	0.2	3
8.6	-0.1	3
2.3	0.3	3
2.5	1.5	3
1.7	1	3
15.5	-0.6	3
11.1	-1.1	3
2.8	1	3
9.7	0.2	3
3.5	0	3
3.6	0.1	3
5	-1.1	3
5.3	-0.4	3
3.8	-0.9	3
10.7	-0.9	3
16.2	-0.9	3
21.9	-0.6	3
5.7	-0.4	3
4.6	-0.2	3
5.3	-0.4	3
4.8	-0.8	3
7.5	-0.8	3
19.8	0.4	3
4.8	-0.3	3
12.5	-0.7	3
10	1.5	3
13.9	-1.2	3
2.2	0	3
3.1	0.5	3
4.2	0.3	3
2.8	-0.3	3
2.2	0.5	3
8.5	-0.5	3
4.1	-0.2	3
4.1	0.5	3
1.8	-0.1	3
2.6	-0.4	3
4.2	0.1	3
2.7	-0.4	3
6.3	0.3	3
13.3	0.3	3
6	0	3
6.1	0.2	3
6.5	0.1	3
6.9	0.5	3
5.8	0.3	3
5.6	0.3	3
7.6	-0.5	3
6	0.3	3
4	0.4	3
6.9	0.8	3
7.1	0.7	3
8.7	0.5	3
6.6	0.6	3
1.2	0.5	3
7.4	0	3
3.7	-1.3	3
2.7	-1.5	3
2.8	-0.7	3
3.2	-0.9	3
7.9	-0.1	3
9.1	0.1	3
13.6	0.4	3
7.7	-0.3	3
13.3	-0.5	3
10.2	-0.5	3
2.8	-0.3	3
1.4	-0.7	3
5.4	-1.2	3
4.8	-1.1	3
12.2	-0.7	3
12.2	-0.7	3
