# Supplementary material for: Instantaneous movement-unrelated midbrain activity modifies ongoing eye movements
Source: eLife. 2021 May 6;10:e64150. doi: 10.7554/eLife.64150 (PMC8143798; doi:10.7554/eLife.64150)
Supplement: Figure 2—figure supplement 1—source data 1. [file elife-64150-fig2-figsupp1-data1.xlsx]

## Sheet: A - Peak firing rate (Toward)
peak_FR_nosac	peak_FR_wtsac	task	task legend
142.481	172.461	1	1=contrast task
50.1172	38.3674	1	2=contrast taks - shared neurons
101.107	108.901	1	3= spatial frequency task
97.745	107.601	1	4=spatial frequency stask neurons
150.317	153.319	1
200.442	224.051	1
32.3326	45.427	1
222.374	251.958	1
114.379	87.9129	1
57.6814	83.0076	1
49.5797	24.8356	1
136.273	131.878	1
90.6764	95.2149	1
15.525	17.4896	1
84.4732	91.5924	1
43.3077	22.0527	1
19.2327	18.1759	1
68.6092	51.0867	1
239.669	224.963	1
176.737	177.942	1
60.332	41.569	1
58.9999	43.2816	1
68.8178	63.5083	1
65.1146	49.2704	1
32.3324	35.3001	1
129.825	124.211	1
135.353	104.648	1
39.302	49.2952	1
37.9501	31.4147	1
36.4408	31.0245	1
113.85	98.0135	1
65.5474	55.421	1
21.9627	46.6011	1
174.599	208.987	1
12.3572	34.2166	1
46.4474	41.3562	1
86.0825	89.569	1
91.389	117.756	1
9.1232	55.9389	1
83.8405	84.2779	1
181.762	168.18	1
100.319	123.644	1
57.2287	48.8788	1
293.577	299.537	1
116.038	122.12	1
158.797	183.71	1
256.227	255.072	1
226.276	218.759	1
251.924	288.088	1
237.673	174.181	1
94.8672	133.29	1
139.975	153.217	1
145.377	147.322	1
161.798	144.336	1
242.166	215.628	1
222.196	209.831	1
160.413	186.735	1
229.639	218.852	1
160.299	166.37	1
79.9094	94.3919	1
144.488	149.48	1
130.733	131.992	1
123.221	142.975	1
121.293	95.6116	1
144.357	120.657	1
220.443	180.986	1
68.418	40.0819	1
89.4299	97.6062	1
135.159	121.593	1
248.6	302.151	1
73.854	73.9792	1
66.3999	66.8503	1
25.0146	28.7774	1
29.8782	35.0478	1
182.165	180.73	2
264.009	320.185	2
135.681	138.922	2
140.615	161.832	2
150.098	151.165	2
215.432	231.399	2
333.051	283.199	2
204.466	187.9	2
162.752	178.934	2
227.154	213.161	2
294.665	266.293	2
199.864	194.752	3
289.246	301.276	3
268.19	243.871	3
146.599	170.674	3
60.9091	36.8316	3
309.475	340.928	3
74.4216	109.989	3
189.188	203.45	3
52.1885	60.4348	3
171.95	203.416	3
128.488	100.399	3
339.523	343.207	3
208.668	182.32	3
64.5738	68.7896	3
53.1107	35.2068	3
362.427	289.668	3
284.221	325.446	3
39.2759	37.3659	3
251.128	267.597	3
134.228	122.872	3
255.678	216.637	3
52.7049		3
107.902		3
102.31	223.689	3
61.8189	52.3579	3
164.841	190.427	3
274.138		3
125.128	151.652	3
308.461	257.493	3
226.936	201.003	3
126.999	39.8942	3
188.88	79.3905	3
118.438	79.5938	3
95.9405	39.8942	3
212.686		3
45.5297	42.6517	3
38.6006	19.9471	3
106.49	90.904	3
407.318	258.565	3
109.693	274.022	3
227.753	193.794	3
191.467		3
122.823	139.747	3
226.921		3
178.209	179.143	4
348.309	306.362	4
157.162	187.946	4
249.055	260.208	4
124.622	127.123	4
186.235	157.672	4
518.913	487.217	4
247.348	276.917	4
154.749	313.879	4
278.455	219.609	4
248.883	188.856	4

## Sheet: B - Peak firing rate (Opposite)
peak_FR_nosac	peak_FR_wtsac	task	task legend
142.481	161.041	1	1=contrast task
50.1172	39.0171	1	2=contrast taks - shared neurons
101.107	100.898	1	3= spatial frequency task
97.745	115.379	1	4=spatial frequency stask neurons
150.317	140.47	1
200.442	200.604	1
32.3326	41.8728	1
222.374	262.093	1
114.379	92.5512	1
57.6814	36.4058	1
49.5797	26.6152	1
136.273	142.394	1
90.6764	92.553	1
15.525	8.13848	1
84.4732	81.3838	1
43.3077	44.2936	1
19.2327	12.7898	1
68.6092	40.5397	1
239.669	320.537	1
176.737	197.689	1
60.332	39.9238	1
58.9999	33.3187	1
68.8178	62.1854	1
65.1146	59.4134	1
32.3324	28.8489	1
129.825	109.783	1
135.353	131.353	1
39.302	26.1779	1
37.9501	32.2374	1
36.4408	23.0438	1
113.85	92.3706	1
65.5474	45.8185	1
21.9627	24.2668	1
174.599	174.768	1
12.3572	7.29894	1
46.4474	41.0005	1
86.0825	87.0369	1
91.389	75.8637	1
9.1232	5.12113	1
83.8405	83.2938	1
181.762	158.189	1
100.319	95.5536	1
57.2287	62.3058	1
293.577	290.27	1
116.038	113.209	1
158.797	152.16	1
256.227	241.976	1
226.276	227.218	1
251.924	271.579	1
237.673	187.999	1
94.8672	59.1374	1
139.975	142.517	1
145.377	149.129	1
161.798	147.747	1
242.166	206.688	1
222.196	231.783	1
160.413	137.92	1
229.639	198.461	1
160.299	153.733	1
79.9094	55.2291	1
144.488	134.414	1
130.733	91.0909	1
123.221	134.003	1
121.293	95.3145	1
144.357	124.364	1
220.443	216.385	1
68.418	37.5167	1
89.4299	66.8767	1
135.159	102.833	1
248.6	263.666	1
73.854	56.0804	1
66.3999	54.3393	1
25.0146	29.049	1
29.8782	34.898	1
182.165	199.955	2
264.009	307.772	2
135.681	116.997	2
140.615	142.171	2
150.098	148.99	2
215.432	189.844	2
333.051	273.372	2
204.466	188.223	2
162.752	147.083	2
227.154	201.922	2
294.665	261.974	2
199.864	228.13	3
289.246	310.685	3
268.19	230.026	3
146.599	109.582	3
60.9091	43.821	3
309.475	266.799	3
74.4216	52.9862	3
189.188	174.903	3
52.1885	45.9224	3
171.95	231.787	3
128.488	132.346	3
339.523	332.679	3
208.668	202.01	3
64.5738	69.8104	3
53.1107	62.8857	3
362.427	260.823	3
284.221	240.109	3
39.2759	35.9664	3
251.128	262.421	3
134.228	130.653	3
255.678	229.791	3
52.7049		3
107.902		3
102.31	70.7312	3
61.8189	40.2133	3
164.841	185.478	3
274.138	169.602	3
125.128	95.3204	3
308.461	176.617	3
226.936	157.798	3
126.999	39.8942	3
188.88		3
118.438		3
95.9405	42.6517	3
212.686	106.469	3
45.5297	66.4701	3
38.6006	48.0458	3
106.49	96.5343	3
407.318	475.647	3
109.693	82.9515	3
227.753	212.63	3
191.467	141.317	3
122.823		3
226.921	254.346	3
178.209	188.781	4
348.309	280.718	4
157.162	137.898	4
249.055	187.911	4
124.622	127.924	4
186.235	117.733	4
518.913	484.028	4
247.348	322.039	4
154.749	131.656	4
278.455	273.593	4
248.883	242.967	4
