# Supplementary material for: Instantaneous movement-unrelated midbrain activity modifies ongoing eye movements
Source: eLife. 2021 May 6;10:e64150. doi: 10.7554/eLife.64150 (PMC8143798; doi:10.7554/eLife.64150)
Supplement: Figure 2—source data 1. [file elife-64150-fig2-data1.xlsx]

## Sheet: A - Firing rate (spikes per s)
time	mean_nosac	low95CI_nosac	up95CI_nosac	mean_wtsac	low95CI_wtsac	up95CI_wtsac
-100	3.31216	0.0551248	6.5692	2.518	0.11644	4.91956
-99	3.37699	0.13424	6.61973	2.67731	0.145175	5.20944
-98	3.44185	0.217561	6.66614	2.823	0.17788	5.46811
-97	3.49828	0.302919	6.69364	2.95262	0.214867	5.69037
-96	3.58756	0.409828	6.76529	3.06425	0.256427	5.87208
-95	3.67327	0.509282	6.83725	3.1566	0.302786	6.01042
-94	3.76847	0.612655	6.92428	3.22907	0.354038	6.10411
-93	3.87497	0.719179	7.03077	3.28177	0.410062	6.15349
-92	3.99405	0.827905	7.16019	3.31551	0.470412	6.1606
-91	4.14079	0.954042	7.32755	3.33171	0.534193	6.12923
-90	4.30536	1.07959	7.53112	3.33235	0.599927	6.06478
-89	4.47362	1.1996	7.74765	3.34225	0.677087	6.00742
-88	4.66975	1.31793	8.02157	3.32648	0.743091	5.90988
-87	4.86762	1.4385	8.29674	3.3048	0.803293	5.80631
-86	5.07575	1.55877	8.59274	3.28017	0.85378	5.70656
-85	5.29135	1.67819	8.9045	3.25532	0.890627	5.62002
-84	5.52567	1.81275	9.23859	3.23262	0.910575	5.55467
-83	5.75088	1.93393	9.56783	3.21393	0.911782	5.51609
-82	5.97425	2.05349	9.895	3.20055	0.894416	5.50669
-81	6.19219	2.17074	10.2136	3.19315	0.860802	5.5255
-80	6.4012	2.28489	10.5175	3.1918	0.815043	5.56855
-79	6.59795	2.3951	10.8008	3.19597	0.76224	5.6297
-78	6.7794	2.50044	11.0584	3.20465	0.707618	5.70168
-77	6.94284	2.59986	11.2858	3.2164	0.655783	5.77701
-76	7.10049	2.70395	11.497	3.24071	0.620663	5.86076
-75	7.20462	2.77993	11.6293	3.25692	0.587469	5.92638
-74	7.31372	2.8601	11.7673	3.2716	0.564675	5.97852
-73	7.41286	2.93371	11.892	3.28302	0.552046	6.01399
-72	7.47766	2.98814	11.9672	3.28963	0.548266	6.03099
-71	7.51936	3.02592	12.0128	3.2901	0.551174	6.02902
-70	7.5386	3.04473	12.0325	3.28337	0.558026	6.00871
-69	7.53623	3.04241	12.0301	3.27991	0.566163	5.99366
-68	7.51323	3.01723	12.0092	3.2605	0.572495	5.9485
-67	7.47063	2.96816	11.9731	3.23348	0.57459	5.89238
-66	7.41322	2.8994	11.927	3.19078	0.563161	5.8184
-65	7.34226	2.81213	11.8724	3.14344	0.545333	5.74155
-64	7.2555	2.70455	11.8065	3.11121	0.543544	5.67887
-63	7.16889	2.59681	11.741	3.05679	0.517211	5.59636
-62	7.07408	2.47613	11.672	3.00876	0.497859	5.51966
-61	6.95925	2.34191	11.5766	2.94899	0.476966	5.42101
-60	6.83706	2.207	11.4671	2.89782	0.454056	5.34158
-59	6.70941	2.0762	11.3426	2.84551	0.432626	5.25839
-58	6.57826	1.95376	11.2028	2.79341	0.414148	5.17268
-57	6.46005	1.84653	11.0736	2.74275	0.399326	5.08618
-56	6.34701	1.76832	10.9257	2.69456	0.388051	5.00106
-55	6.21696	1.68337	10.7505	2.64966	0.379473	4.91985
-54	6.12194	1.64919	10.5947	2.60867	0.372157	4.84519
-53	6.03998	1.63672	10.4432	2.57195	0.364331	4.77957
-52	5.94912	1.63011	10.2681	2.53959	0.354164	4.72503
-51	5.88685	1.64738	10.1263	2.51145	0.340056	4.68284
-50	5.84074	1.68249	9.99899	2.50953	0.335384	4.68368
-49	5.81244	1.73354	9.89135	2.49565	0.316493	4.67481
-48	5.80308	1.79824	9.80793	2.48598	0.294004	4.67796
-47	5.80244	1.86168	9.7432	2.47983	0.268909	4.69076
-46	5.84947	1.96578	9.73316	2.48764	0.25465	4.72063
-45	5.90864	2.06596	9.75131	2.48142	0.223512	4.73934
-44	5.99005	2.17165	9.80845	2.49902	0.218387	4.77965
-43	6.06727	2.25502	9.87952	2.5016	0.211085	4.79211
-42	6.20198	2.36751	10.0364	2.50788	0.199456	4.81631
-41	6.33895	2.47593	10.202	2.52565	0.206724	4.84457
-40	6.48668	2.57893	10.3944	2.54402	0.222298	4.86574
-39	6.64241	2.67535	10.6095	2.56349	0.246857	4.88013
-38	6.80295	2.76415	10.8417	2.58467	0.280503	4.88883
-37	6.95403	2.84019	11.0679	2.60823	0.322682	4.89378
-36	7.11641	2.91171	11.3211	2.6349	0.372109	4.8977
-35	7.27197	2.9733	11.5706	2.66537	0.426731	4.90401
-34	7.41704	3.02435	11.8097	2.70021	0.483763	4.91667
-33	7.54804	3.06433	12.0318	2.73983	0.539839	4.93982
-32	7.66525	3.09038	12.2401	2.78434	0.591298	4.97738
-31	7.75488	3.09757	12.4122	2.84476	0.64684	5.04268
-30	7.83526	3.10834	12.5622	2.88501	0.672536	5.09749
-29	7.87919	3.10236	12.656	2.95046	0.699903	5.20102
-28	7.90968	3.08727	12.7321	3.01767	0.713871	5.32148
-27	7.92592	3.07535	12.7765	3.09649	0.72568	5.46729
-26	7.90327	3.03837	12.7682	3.16637	0.72054	5.61219
-25	7.84204	2.9766	12.7075	3.24503	0.720608	5.76945
-24	7.76746	2.91869	12.6162	3.31168	0.708171	5.91518
-23	7.66641	2.84844	12.4844	3.37276	0.695232	6.05029
-22	7.54065	2.76664	12.3147	3.42649	0.684332	6.16865
-21	7.39226	2.67431	12.1102	3.47128	0.677553	6.265
-20	7.2236	2.57276	11.8744	3.50586	0.676446	6.33528
-19	7.03723	2.46357	11.6109	3.52939	0.681992	6.37679
-18	6.83584	2.34853	11.3231	3.54147	0.694576	6.38836
-17	6.61136	2.2264	10.9963	3.53381	0.70635	6.36127
-16	6.39101	2.1066	10.6754	3.52588	0.733913	6.31784
-15	6.16311	1.98589	10.3403	3.50752	0.765311	6.24973
-14	5.91953	1.8533	9.98576	3.48014	0.798467	6.1618
-13	5.68717	1.73757	9.63677	3.45653	0.842926	6.07014
-12	5.45385	1.62243	9.28528	3.41962	0.874865	5.96438
-11	5.22157	1.50751	8.93563	3.37958	0.900001	5.85915
-10	4.99193	1.39193	8.59193	3.3297	0.905737	5.75366
-9	4.76618	1.27449	8.25787	3.29033	0.909954	5.6707
-8	4.54517	1.15397	7.93636	3.25146	0.89857	5.60435
-7	4.31857	1.01729	7.61985	3.21389	0.87119	5.55659
-6	4.12553	0.908035	7.34303	3.17799	0.828959	5.52701
-5	3.94188	0.785815	7.09794	3.1353	0.765252	5.50535
-4	3.74342	0.649168	6.83767	3.10428	0.7043	5.50426
-3	3.55478	0.523835	6.58572	3.07302	0.637872	5.50817
-2	3.41524	0.441803	6.38868	3.04058	0.569891	5.51126
-1	3.26228	0.345883	6.17867	3.00582	0.503739	5.5079
0	3.11852	0.264037	5.973	2.96757	0.442003	5.49313
1	3.01415	0.211692	5.81661	2.92465	0.386369	5.46294
2	2.8912	0.16017	5.62224	2.87604	0.337619	5.41446
3	2.78694	0.14974	5.42415	2.82089	0.295707	5.34606
4	2.7137	0.159898	5.26749	2.75859	0.259869	5.25731
5	2.64881	0.182281	5.11534	2.68883	0.228776	5.14888
6	2.60861	0.230188	4.98702	2.61156	0.200702	5.02242
7	2.60574	0.311501	4.89998	2.52703	0.173715	4.88034
8	2.6283	0.405683	4.85091	2.44692	0.157925	4.73592
9	2.70742	0.536913	4.87793	2.33645	0.113458	4.55944
10	2.83965	0.697554	4.98174	2.27652	0.11144	4.4416
11	2.97502	0.8226	5.12745	2.22351	0.126125	4.32089
12	3.20512	1.00092	5.40931	2.18194	0.15073	4.21315
13	3.48039	1.16446	5.79633	2.12616	0.156887	4.09543
14	3.81907	1.37474	6.26341	2.15213	0.23555	4.0687
15	4.23596	1.62986	6.84206	2.17356	0.303635	4.04348
16	4.76534	1.94923	7.58145	2.27568	0.459983	4.09137
17	5.43085	2.38638	8.47532	2.46677	0.701022	4.23252
18	6.18448	2.8894	9.47956	2.73642	1.00177	4.47108
19	7.02878	3.4688	10.5888	3.14608	1.43496	4.85721
20	8.08598	4.24755	11.9244	3.72897	1.99623	5.46172
21	9.31291	5.17613	13.4497	4.37827	2.59565	6.16089
22	10.7053	6.24019	15.1705	5.28265	3.40112	7.16418
23	12.2528	7.44665	17.0589	6.44078	4.38644	8.49513
24	14.1678	8.97997	19.3557	7.78611	5.47639	10.0958
25	16.3644	10.7743	21.9545	9.5575	6.90584	12.2092
26	18.8771	12.8188	24.9355	11.5467	8.4697	14.6237
27	21.6877	15.1435	28.2319	13.9685	10.3927	17.5443
28	24.9584	17.8028	32.1139	16.8191	12.6251	21.0131
29	28.7589	20.9279	36.5899	20.1423	15.2467	25.0379
30	32.9828	24.4222	41.5434	23.9331	18.2807	29.5855
31	37.6894	28.3362	47.0426	28.2621	21.7794	34.7448
32	42.9167	32.6879	53.1455	33.1536	25.7653	40.542
33	48.7962	37.6122	59.9802	38.5858	30.2189	46.9527
34	55.2373	43.0503	67.4242	44.7158	35.3115	54.1202
35	62.2822	49.072	75.4924	51.4578	40.9585	61.9571
36	69.9164	55.6304	84.2024	58.8146	47.1763	70.4529
37	78.1819	62.8068	93.5569	66.7713	53.9471	79.5955
38	86.8799	70.4	103.36	75.3446	61.3464	89.3428
39	96.1621	78.5945	113.73	84.4284	69.2474	99.6094
40	105.825	87.2228	124.428	94.0487	77.6785	110.419
41	115.922	96.3325	135.512	104.076	86.5832	121.569
42	126.273	105.751	146.794	114.449	95.8781	133.02
43	136.87	115.486	158.254	125.019	105.432	144.606
44	147.536	125.39	169.682	135.769	115.249	156.289
45	158.205	135.402	181.009	146.598	125.238	167.959
46	168.734	145.382	192.087	157.352	135.287	179.418
47	178.982	155.183	202.781	167.887	145.231	190.544
48	188.887	164.747	213.027	178.106	154.988	201.223
49	198.295	173.901	222.688	187.923	164.485	211.36
50	207.027	182.503	231.551	197.168	173.531	220.805
51	215.013	190.466	239.56	205.805	182.105	229.505
52	222.158	197.695	246.622	213.683	190.034	237.332
53	228.347	204.05	252.645	220.734	197.242	244.225
54	233.497	209.445	257.549	226.919	203.679	250.159
55	237.576	213.844	261.308	232.133	209.224	255.042
56	240.495	217.153	263.837	236.348	213.823	258.873
57	242.195	219.289	265.102	239.589	217.484	261.694
58	242.722	220.298	265.147	241.786	220.129	263.444
59	242.05	220.142	263.958	242.958	221.749	264.167
60	240.179	218.824	261.534	243.092	222.321	263.864
61	237.196	216.398	257.995	242.24	221.889	262.59
62	233.128	212.897	253.359	240.422	220.469	260.375
63	228.057	208.403	247.712	237.67	218.083	257.256
64	222.042	202.962	241.123	234.047	214.8	253.295
65	215.186	196.677	233.696	229.589	210.658	248.519
66	207.589	189.646	225.532	224.36	205.73	242.99
67	199.356	181.975	216.737	218.415	200.078	236.751
68	190.575	173.756	207.394	211.836	193.791	229.881
69	181.372	165.113	197.632	204.656	186.911	222.401
70	171.901	156.198	187.603	196.976	179.544	214.408
71	162.179	147.037	177.321	188.878	171.775	205.982
72	152.363	137.788	166.937	180.432	163.69	197.174
73	142.542	128.55	156.534	171.656	155.291	188.022
74	132.815	119.409	146.221	162.702	146.751	178.653
75	123.201	110.389	136.012	153.585	138.077	169.092
76	113.775	101.573	125.978	144.381	129.34	159.422
77	104.682	93.0964	116.268	135.203	120.666	149.741
78	95.9464	84.9644	106.928	126.062	112.052	140.071
79	87.5155	77.1277	97.9033	117.057	103.596	130.518
80	79.5186	69.7276	89.3096	108.335	95.4357	121.234
81	71.9738	62.7826	81.1651	99.7907	87.4771	112.104
82	64.9369	56.3174	73.5564	91.5224	79.7871	103.258
83	58.2454	50.168	66.3228	83.6777	72.5356	94.8198
84	52.0694	44.506	59.6328	76.0862	65.542	86.6304
85	46.3632	39.3073	53.4192	69.0422	59.0764	79.0081
86	41.1705	34.5564	47.7847	62.3774	52.9919	71.7629
87	36.3979	30.235	42.5607	56.1347	47.3091	64.9603
88	32.0147	26.2533	37.7762	50.3574	42.0909	58.624
89	28.1528	22.7787	33.5268	45.0702	37.3623	52.778
90	24.7413	19.729	29.7535	40.2389	33.061	47.4167
91	21.7178	17.0188	26.4168	35.8505	29.181	42.5199
92	19.0073	14.6072	23.4074	31.9346	25.7426	38.1267
93	16.6911	12.5718	20.8104	28.3386	22.589	34.0882
94	14.704	10.8271	18.5809	25.1898	19.8549	30.5248
95	13.0341	9.35198	16.7163	22.4229	17.455	27.3907
96	11.6119	8.07661	15.1472	20.0204	15.384	24.6567
97	10.5631	7.13832	13.9878	17.922	13.555	22.2889
98	9.66043	6.28176	13.0391	16.1673	12.0157	20.3189
99	9.03201	5.67356	12.3905	14.6523	10.6571	18.6474
100	8.52858	5.14649	11.9107	13.4178	9.51622	17.3193
101	8.22811	4.76631	11.6899	12.4114	8.52841	16.2943
102	8.02029	4.464	11.5766	11.6456	7.74131	15.5498
103	7.95831	4.2598	11.6568	11.0057	7.02977	14.9816
104	7.96802	4.12642	11.8096	10.4871	6.40686	14.5674
105	8.05427	4.03971	12.0688	10.0986	5.92083	14.2763
106	8.20519	4.0199	12.3905	9.83673	5.53482	14.1387
107	8.34281	3.9819	12.7037	9.64381	5.22712	14.0605
108	8.49231	3.95766	13.027	9.48658	4.97811	13.9951
109	8.68012	3.99749	13.3627	9.38573	4.79251	13.979
110	8.83667	4.02607	13.6473	9.2792	4.63395	13.9245
111	8.941	4.03386	13.8481	9.20614	4.52989	13.8824
112	8.99825	4.01317	13.9833	9.13432	4.4474	13.8212
113	9.0264	3.9954	14.0574	9.03159	4.36317	13.7
114	8.97161	3.93003	14.0132	8.93061	4.30143	13.5598
115	8.88173	3.84812	13.9153	8.81415	4.25074	13.3776
116	8.72915	3.74664	13.7117	8.63938	4.1604	13.1184
117	8.5137	3.61574	13.4117	8.49076	4.12318	12.8583
118	8.24064	3.45913	13.0221	8.31154	4.06992	12.5532
119	7.9168	3.28127	12.5523	8.13969	4.03921	12.2402
120	7.5503	3.08715	12.0134	7.95093	3.9969	11.905
121	7.15025	2.88204	11.4185	7.76244	3.95526	11.5696
122	6.73011	2.67552	10.7847	7.59965	3.93516	11.2641
123	6.30007	2.47275	10.1274	7.43035	3.88996	10.9707
124	5.86673	2.27426	9.45919	7.30978	3.87357	10.746
125	5.43992	2.08386	8.79598	7.19384	3.82523	10.5624
126	5.02868	1.90409	8.15328	7.11427	3.7734	10.4551
127	4.64097	1.73588	7.54607	7.06607	3.70608	10.4261
128	4.28346	1.57845	6.98847	7.04018	3.61176	10.4686
129	3.96135	1.42935	6.49335	7.05637	3.5141	10.5987
130	3.69281	1.2882	6.09742	7.08644	3.39009	10.7828
131	3.45567	1.14378	5.76756	7.15557	3.27171	11.0394
132	3.27602	1.01271	5.53932	7.26077	3.16601	11.3555
133	3.11814	0.854018	5.38225	7.37944	3.06036	11.6985
134	3.0156	0.709549	5.32165	7.51555	2.96742	12.0637
135	2.95129	0.566868	5.3357	7.66431	2.89029	12.4383
136	2.92169	0.430811	5.41257	7.82351	2.83385	12.8132
137	2.93713	0.313369	5.5609	7.98819	2.79853	13.1778
138	2.9687	0.204163	5.73324	8.13406	2.76178	13.5063
139	3.01172	0.0994812	5.92395	8.28617	2.75524	13.8171
140	3.08594	0.0267226	6.14517	8.42882	2.76093	14.0967
141	3.19072	-0.0067204	6.38815	8.56643	2.78475	14.3481
142	3.28707	-0.0570779	6.63122	8.67666	2.80019	14.5531
143	3.38186	-0.0899198	6.85364	8.7761	2.8228	14.7294
144	3.50706	-0.0986773	7.11279	8.84333	2.82505	14.8616
145	3.63201	-0.0995056	7.36353	8.87902	2.80362	14.9544
146	3.74472	-0.106496	7.59593	8.90871	2.78293	15.0345
147	3.85799	-0.106928	7.8229	8.90937	2.73422	15.0845
148	3.97062	-0.103533	8.04478	8.88054	2.65507	15.106
149	4.08179	-0.0985906	8.26218	8.81357	2.53557	15.0916
150	4.20173	-0.0820627	8.48552	8.73006	2.40105	15.0591

## Sheet: A - raster no saccades
spike time	trial
42	1
48	1
51	1
54	1
58	1
59	1
62	1
64	1
65	1
68	1
75	1
79	1
2	2
46	2
53	2
55	2
57	2
58	2
61	2
64	2
66	2
72	2
74	2
45	3
49	3
51	3
56	3
58	3
59	3
66	3
68	3
52	4
60	4
62	4
64	4
66	4
74	4
81	4
112	4
46	5
55	5
58	5
62	5
65	5
68	5
69	5
74	5
-37	6
46	6
50	6
53	6
54	6
56	6
59	6
60	6
64	6
65	6
84	6
48	7
53	7
54	7
57	7
60	7
63	7
64	7
68	7
70	7
-67	8
-44	8
39	8
44	8
47	8
49	8
50	8
53	8
54	8
57	8
58	8
60	8
63	8
66	8
67	8
78	8
50	9
54	9
56	9
58	9
63	9
75	9
43	10
51	10
53	10
56	10
58	10
63	10
65	10
70	10
109	10
43	11
47	11
49	11
53	11
54	11
55	11
58	11
63	11
65	11
72	11
77	11
47	12
50	12
53	12
57	12
59	12
61	12
63	12
64	12
71	12
78	12
-62	13
-47	13
-13	13
24	13
42	13
46	13
49	13
53	13
57	13
59	13
66	13
70	13
74	13
111	13
144	13
159	13
188	13
199	13
-61	14
23	14
45	14
51	14
53	14
55	14
57	14
59	14
62	14
65	14
68	14
73	14
77	14
151	14
166	14
170	14
181	14
190	14
-75	15
-33	15
-16	15
38	15
41	15
43	15
45	15
47	15
49	15
51	15
54	15
55	15
57	15
58	15
62	15
63	15
65	15
67	15
72	15
78	15
46	16
54	16
55	16
59	16
60	16
65	16
71	16
80	16
-73	17
41	17
46	17
49	17
50	17
54	17
56	17
62	17
69	17
71	17
170	17
200	17
45	18
52	18
57	18
61	18
62	18
69	18
72	18
103	18
-55	19
48	19
53	19
55	19
58	19
59	19
63	19
65	19
70	19
83	19
113	19
-96	20
-27	20
-3	20
30	20
42	20
46	20
50	20
51	20
52	20
55	20
57	20
58	20
61	20
62	20
63	20
68	20
27	21
57	21
61	21
64	21
67	21
74	21
75	21
77	21
113	21
142	21
185	21
46	22
51	22
54	22
56	22
58	22
62	22
64	22
68	22
73	22
76	22
118	22
-34	23
30	23
46	23
51	23
54	23
55	23
58	23
60	23
62	23
64	23
68	23
71	23
77	23
49	24
54	24
58	24
61	24
62	24
65	24
39	25
44	25
47	25
49	25
50	25
52	25
53	25
59	25
62	25
66	25
70	25
78	25
50	26
60	26
66	26
73	26
85	26
46	27
51	27
54	27
56	27
59	27
61	27
66	27
70	27
191	27
45	28
53	28
56	28
59	28
62	28
64	28
66	28
73	28
44	29
49	29
53	29
55	29
56	29
58	29
60	29
64	29
68	29
184	29
-73	30
-24	30
41	30
46	30
49	30
54	30
57	30
61	30
65	30
-82	31
-59	31
-28	31
47	31
52	31
55	31
58	31
63	31
72	31
82	31
92	31
53	32
57	32
60	32
63	32
81	32
43	33
49	33
50	33
55	33
58	33
61	33
66	33
77	33
-85	34
42	34
45	34
48	34
53	34
58	34
60	34
-17	35
38	35
47	35
50	35
52	35
58	35
61	35
72	35
49	36
54	36
59	36
64	36
72	36
84	36
117	36
-77	37
27	37
41	37
45	37
47	37
48	37
50	37
53	37
57	37
58	37
66	37
68	37
82	37
55	38
63	38
66	38
69	38
70	38
75	38
161	38
50	39
57	39
60	39
62	39
70	39
78	39
191	39
51	40
56	40
59	40
66	40
76	40
119	40
-25	41
39	41
44	41
48	41
55	41
59	41
62	41
66	41
67	41
116	41
199	41

## Sheet: A - raster with saccade
spike time	trial
45	1
48	1
52	1
53	1
57	1
58	1
59	1
65	1
66	1
69	1
73	1
86	1
43	2
48	2
49	2
53	2
57	2
62	2
65	2
78	2
115	2
51	3
54	3
56	3
61	3
63	3
64	3
67	3
70	3
71	3
78	3
43	4
48	4
49	4
52	4
53	4
54	4
55	4
57	4
59	4
63	4
69	4
75	4
45	5
48	5
50	5
52	5
54	5
55	5
57	5
58	5
62	5
64	5
68	5
74	5
137	5
142	5
146	5
43	6
46	6
48	6
51	6
53	6
54	6
55	6
57	6
62	6
67	6
69	6
74	6
79	6
153	6
37	7
44	7
48	7
49	7
52	7
53	7
54	7
57	7
58	7
63	7
66	7
69	7
73	7
54	8
59	8
61	8
63	8
65	8
70	8
71	8
75	8
80	8
39	9
44	9
46	9
47	9
49	9
51	9
54	9
55	9
56	9
57	9
65	9
66	9
67	9
72	9
74	9
46	10
49	10
52	10
54	10
59	10
67	10
71	10
76	10
52	11
58	11
62	11
66	11
71	11
76	11
80	11
195	11
48	12
54	12
59	12
60	12
63	12
65	12
66	12
69	12
73	12
74	12
81	12
83	12
48	13
52	13
56	13
60	13
61	13
66	13
74	13
45	14
49	14
51	14
54	14
57	14
64	14
67	14
71	14
76	14
165	14
48	15
54	15
58	15
61	15
63	15
64	15
70	15
77	15
88	15
179	15
42	16
48	16
51	16
54	16
56	16
57	16
58	16
62	16
63	16
68	16
69	16
73	16
76	16
77	16
79	16
51	17
55	17
56	17
59	17
63	17
67	17
68	17
4	18
39	18
43	18
47	18
49	18
52	18
56	18
58	18
61	18
64	18
66	18
69	18
70	18
81	18
109	18
120	18
190	18
-21	19
47	19
51	19
52	19
58	19
61	19
63	19
64	19
68	19
73	19
78	19
82	19
123	19
55	20
59	20
62	20
66	20
67	20
72	20
75	20
79	20
87	20
134	20
40	21
46	21
49	21
55	21
57	21
59	21
61	21
64	21
65	21
70	21
73	21
75	21
76	21
151	21
156	21
158	21
161	21
186	21
40	22
47	22
48	22
56	22
63	22
66	22
75	22
110	22
52	23
55	23
56	23
64	23
69	23
90	23
41	24
45	24
47	24
49	24
50	24
52	24
53	24
57	24
58	24
60	24
61	24
63	24
66	24
68	24
74	24
139	24
146	24
182	24
53	25
57	25
60	25
63	25
65	25
70	25
75	25
78	25
86	25
52	26
56	26
60	26
64	26
68	26
70	26
74	26
112	26
198	26
-75	27
-2	27
51	27
56	27
59	27
64	27
65	27
67	27
69	27
71	27
75	27
119	27
200	27
-91	28
-60	28
-21	28
41	28
45	28
47	28
48	28
50	28
52	28
54	28
57	28
58	28
59	28
63	28
69	28
71	28
-72	29
-15	29
49	29
53	29
54	29
56	29
60	29
65	29
69	29
71	29
77	29
86	29
155	29
16	30
59	30
68	30
71	30
72	30
75	30
84	30
91	30
-95	31
-17	31
49	31
52	31
54	31
58	31
60	31
61	31
64	31
68	31
69	31
70	31
75	31
80	31
83	31
100	31
114	31
46	32
49	32
51	32
53	32
56	32
61	32
66	32
72	32
82	32
86	32
39	33
49	33
54	33
56	33
60	33
67	33
81	33
46	34
49	34
53	34
56	34
58	34
69	34
186	34
50	35
56	35
60	35
61	35
65	35
70	35
73	35
76	35
-35	36
41	36
51	36
54	36
57	36
58	36
65	36
72	36
73	36
108	36
52	37
57	37
64	37
74	37
78	37
153	37
40	38
46	38
49	38
50	38
54	38
58	38
60	38
64	38
70	38
71	38
54	39
59	39
63	39
66	39
67	39
69	39
75	39
88	39
43	40
46	40
51	40
54	40
65	40
74	40
133	40
47	41
50	41
52	41
54	41
55	41
59	41
60	41
64	41
66	41
69	41
80	41
83	41
-73	42
-40	42
51	42
56	42
57	42
61	42
63	42
67	42
68	42
78	42
115	42
43	43
48	43
50	43
51	43
52	43
55	43
68	43
74	43
45	44
49	44
52	44
54	44
55	44
57	44
58	44
65	44
72	44
200	44
-96	45
-47	45
2	45
44	45
49	45
51	45
53	45
58	45
69	45
77	45
140	45
-93	46
51	46
56	46
60	46
61	46
63	46
67	46
71	46
74	46
77	46
141	46
-60	47
51	47
55	47
58	47
59	47
62	47
63	47
67	47
78	47
93	47
56	48
60	48
67	48
70	48
74	48
87	48
47	49
52	49
60	49
63	49
68	49
47	50
50	50
53	50
54	50
58	50
64	50
67	50
71	50
80	50
106	50
54	51
57	51
62	51
68	51
70	51
73	51
80	51
188	51
61	52
67	52
70	52
75	52
83	52
46	53
54	53
57	53
65	53
108	53

## Sheet: A - saccade start-end time
sac_str	sac_end	sac_dir
23	56	1
21	69	1
20	45	1
17	56	1
68	105	1
81	116	1
14	49	0
44	78	1
99	127	0
17	57	1
79	120	1
51	87	1
40	79	0
82	116	1
82	121	1
45	94	1
33	65	0
11	43	0
50	80	1
19	62	0
80	133	1
14	57	1
23	55	0
62	95	1
20	58	0
33	55	1
40	70	0
15	50	0
15	44	1
44	77	1
27	73	1
26	50	1
66	86	1
39	70	1
55	83	0
41	72	1
40	67	0
43	76	0
26	60	1
22	54	1
17	60	1
22	53	1
14	65	0
18	60	0
46	80	0
46	83	0
36	69	0
43	78	1
19	55	0
27	59	1
46	78	0
29	64	0
34	68	0

## Sheet: B - Sac. radial amplitude (deg)
time	mean_baseline	lowSEM_baseline	upSEM_baseline	mean_toward	lowSEM_toward	upSEM_toward	mean_opposite	lowSEM_opposite	upSEM_opposite
-50	0.0171888	0.0163417	0.0180359	0.0189275	0.0169164	0.0209387	0.0168484	0.0148563	0.0188405
-49	0.0168583	0.0159721	0.0177446	0.0185546	0.0167176	0.0203916	0.0179467	0.0160577	0.0198358
-48	0.0163723	0.0155121	0.0172324	0.0176985	0.0158054	0.0195916	0.0174167	0.0156436	0.0191897
-47	0.0159559	0.0151539	0.016758	0.0175758	0.0156276	0.0195241	0.0182776	0.0162874	0.0202678
-46	0.016294	0.0154292	0.0171587	0.0175211	0.0156684	0.0193738	0.019664	0.017527	0.0218009
-45	0.01631	0.0154387	0.0171813	0.0182842	0.016422	0.0201464	0.0181311	0.0163936	0.0198685
-44	0.0156571	0.0147723	0.0165419	0.0179723	0.0159765	0.0199682	0.0190261	0.0173991	0.020653
-43	0.0150231	0.0141925	0.0158537	0.0177243	0.0159186	0.01953	0.0176008	0.0159609	0.0192406
-42	0.0153053	0.0144285	0.0161821	0.0169707	0.0152617	0.0186797	0.0175986	0.0157459	0.0194512
-41	0.0152429	0.0143867	0.016099	0.0161845	0.0146638	0.0177053	0.0169518	0.0150871	0.0188166
-40	0.0154679	0.0145614	0.0163744	0.0173341	0.0157196	0.0189485	0.0155405	0.0138803	0.0172007
-39	0.0149011	0.0140278	0.0157745	0.015839	0.0141433	0.0175346	0.0156676	0.0136635	0.0176718
-38	0.0151781	0.0143491	0.0160071	0.0164844	0.0148029	0.0181659	0.0145241	0.012529	0.0165192
-37	0.0147836	0.0139216	0.0156455	0.0168899	0.0152593	0.0185204	0.0153796	0.013585	0.0171742
-36	0.0144123	0.0136049	0.0152197	0.0159057	0.0142882	0.0175232	0.0142222	0.0123833	0.016061
-35	0.0144076	0.0136406	0.0151746	0.0164558	0.0148705	0.018041	0.0138708	0.0121204	0.0156213
-34	0.0145457	0.0137805	0.0153109	0.0151483	0.0136567	0.0166398	0.0136135	0.0114363	0.0157907
-33	0.0144596	0.0136696	0.0152496	0.0144344	0.0128802	0.0159886	0.0127374	0.0109454	0.0145293
-32	0.0141881	0.0133495	0.0150267	0.0156043	0.0140494	0.0171592	0.0127234	0.0110859	0.014361
-31	0.0137831	0.0130172	0.014549	0.0148995	0.0132937	0.0165052	0.0122976	0.0109267	0.0136685
-30	0.0134278	0.0126396	0.014216	0.014672	0.0131833	0.0161607	0.0146279	0.0130262	0.0162296
-29	0.0129787	0.0122308	0.0137267	0.0138552	0.0124043	0.0153062	0.0145431	0.0132133	0.0158729
-28	0.0127723	0.0119897	0.0135549	0.0133272	0.0120336	0.0146208	0.0128384	0.011397	0.0142799
-27	0.0127118	0.0119454	0.0134781	0.0139361	0.0128048	0.0150675	0.0147539	0.0133268	0.0161811
-26	0.0123753	0.0116394	0.0131112	0.0149087	0.0138328	0.0159845	0.0126563	0.0112931	0.0140195
-25	0.0130009	0.0122069	0.0137948	0.0144789	0.0132417	0.0157162	0.0141819	0.0129024	0.0154615
-24	0.0123045	0.0115452	0.0130638	0.0138292	0.0127107	0.0149477	0.0129543	0.0117039	0.0142047
-23	0.0123756	0.0116502	0.0131011	0.0140004	0.0126508	0.01535	0.0134476	0.0120535	0.0148417
-22	0.0121985	0.0114804	0.0129166	0.0122431	0.0110008	0.0134855	0.0142578	0.012833	0.0156827
-21	0.0121211	0.0114095	0.0128327	0.0120162	0.0108044	0.013228	0.0127902	0.0112872	0.0142931
-20	0.0122523	0.0115254	0.0129792	0.0120164	0.0107984	0.0132344	0.0126092	0.0111933	0.0140251
-19	0.0120465	0.0113699	0.0127231	0.0109947	0.00993635	0.0120531	0.0105258	0.00923347	0.0118181
-18	0.0121036	0.0114741	0.0127331	0.0107224	0.00975267	0.011692	0.00960098	0.00820805	0.0109939
-17	0.0110892	0.010417	0.0117614	0.0120709	0.0110317	0.01311	0.0117665	0.0103529	0.01318
-16	0.0117326	0.0110702	0.012395	0.012741	0.0116077	0.0138743	0.011461	0.0101347	0.0127873
-15	0.0115519	0.0108905	0.0122134	0.012667	0.0115312	0.0138029	0.0124655	0.0109842	0.0139468
-14	0.0112476	0.0106316	0.0118636	0.0123981	0.0112906	0.0135056	0.0112002	0.0100628	0.0123377
-13	0.011366	0.0107174	0.0120146	0.0127119	0.0116606	0.0137633	0.0102872	0.00919767	0.0113767
-12	0.0107207	0.0101248	0.0113166	0.0112792	0.0101938	0.0123646	0.00995532	0.00895278	0.0109578
-11	0.0104938	0.00987618	0.0111114	0.0115525	0.0105182	0.0125867	0.00987147	0.0088212	0.0109217
-10	0.00969735	0.00914227	0.0102524	0.0105223	0.0096457	0.0113989	0.0100155	0.00850175	0.0115293
-9	0.00997825	0.00943773	0.0105188	0.0104444	0.00951463	0.0113742	0.00871742	0.00755325	0.00988159
-8	0.00971943	0.00918087	0.010258	0.00915207	0.00811692	0.0101872	0.00939189	0.00820323	0.0105805
-7	0.00986521	0.00938856	0.0103419	0.0103238	0.00933653	0.011311	0.00817185	0.00707019	0.0092735
-6	0.0101496	0.00966707	0.0106321	0.0105437	0.00955402	0.0115333	0.00874836	0.00769334	0.00980338
-5	0.00951493	0.0090807	0.00994917	0.00833935	0.00756138	0.00911732	0.00840347	0.00748223	0.0093247
-4	0.00881148	0.00834477	0.00927818	0.00808084	0.00723381	0.00892787	0.00801999	0.00701976	0.00902022
-3	0.00765148	0.0072748	0.00802815	0.00726414	0.00640717	0.00812111	0.00703069	0.00625433	0.00780705
-2	0.0067873	0.00651272	0.00706188	0.00682336	0.00611999	0.00752672	0.0054033	0.00458798	0.00621863
-1	0.00513683	0.00489014	0.00538352	0.0050148	0.00447174	0.00555786	0.00463405	0.00403931	0.00522879
0	0	0	0	0	0	0	0	0	0
1	0.00530751	0.00505883	0.0055562	0.00477733	0.00435246	0.00520219	0.00566766	0.00508533	0.00624999
2	0.00597685	0.0056591	0.00629459	0.00599659	0.00546549	0.00652769	0.00681203	0.005968	0.00765606
3	0.0077958	0.00743058	0.00816103	0.00756668	0.00690817	0.00822519	0.00653579	0.00567699	0.00739459
4	0.0085715	0.00815335	0.00898964	0.00768328	0.00703882	0.00832773	0.0068621	0.00600111	0.00772309
5	0.0093153	0.00886505	0.00976555	0.0094018	0.00858043	0.0102232	0.00846425	0.00754573	0.00938276
6	0.0130966	0.0125451	0.0136481	0.0124878	0.0113978	0.0135777	0.0136162	0.0124047	0.0148277
7	0.0188332	0.0182018	0.0194646	0.0194089	0.0178234	0.0209945	0.0183127	0.0167397	0.0198856
8	0.0272245	0.0264418	0.0280072	0.0288867	0.0267285	0.0310449	0.0267156	0.0250156	0.0284156
9	0.0359109	0.0348372	0.0369846	0.0408614	0.0379326	0.0437902	0.0361649	0.033673	0.0386569
10	0.046126	0.0447364	0.0475156	0.0564335	0.0519412	0.0609259	0.0458759	0.0425766	0.0491753
11	0.0562857	0.0544721	0.0580992	0.0723887	0.065819	0.0789584	0.0563442	0.0519089	0.0607796
12	0.0654559	0.0632007	0.0677112	0.0897813	0.0805629	0.0989997	0.0642872	0.0591569	0.0694176
13	0.073952	0.071276	0.0766281	0.106138	0.0936041	0.118672	0.0720238	0.0661607	0.0778869
14	0.0811946	0.0780431	0.0843461	0.121922	0.105745	0.138099	0.0776327	0.071056	0.0842093
15	0.0871515	0.083563	0.0907399	0.137607	0.117783	0.157432	0.0826644	0.0752851	0.0900436
16	0.0919416	0.0880239	0.0958593	0.150104	0.126688	0.17352	0.0869838	0.0789572	0.0950104
17	0.0949318	0.0907927	0.0990709	0.162967	0.136121	0.189813	0.0872872	0.079173	0.0954015
18	0.0974495	0.0930749	0.101824	0.171452	0.141516	0.201389	0.089648	0.0810483	0.0982477
19	0.0985034	0.0939509	0.103056	0.179388	0.146484	0.212292	0.0893431	0.0803022	0.098384
20	0.0990863	0.0944529	0.10372	0.184576	0.149124	0.220029	0.0880826	0.0786985	0.0974666
21	0.098377	0.0936594	0.103095	0.188169	0.150317	0.226022	0.0857737	0.0764044	0.0951431
22	0.0970369	0.0923369	0.101737	0.189655	0.149947	0.229362	0.0831766	0.07385	0.0925033
23	0.0953004	0.0907132	0.0998877	0.19014	0.149057	0.231223	0.0807804	0.0716932	0.0898676
24	0.0932006	0.0886524	0.0977488	0.191408	0.14929	0.233527	0.077924	0.0692261	0.0866219
25	0.0915007	0.0870491	0.0959523	0.189851	0.147055	0.232648	0.073077	0.0646234	0.0815307
26	0.0885472	0.0841902	0.0929041	0.189005	0.145557	0.232453	0.0696992	0.0615111	0.0778874
27	0.0861303	0.0818486	0.090412	0.186481	0.142797	0.230165	0.0661926	0.058163	0.0742222
28	0.0833548	0.0791443	0.0875654	0.185565	0.141664	0.229465	0.0653105	0.0574919	0.0731291
29	0.0808696	0.0767334	0.0850058	0.1852	0.141282	0.229117	0.061906	0.0543481	0.0694638
30	0.0791269	0.0750826	0.0831712	0.184182	0.140315	0.228048	0.0610512	0.0537105	0.0683919
31	0.0775319	0.0735939	0.08147	0.18339	0.139772	0.227008	0.0586613	0.0514631	0.0658595
32	0.0763279	0.0725257	0.0801301	0.18334	0.140037	0.226643	0.0574808	0.0502895	0.0646721
33	0.0744388	0.0706432	0.0782343	0.183209	0.140104	0.226314	0.0581693	0.0513194	0.0650192
34	0.0737872	0.0699926	0.0775818	0.182932	0.139905	0.225959	0.0575915	0.0503062	0.0648768
35	0.0734055	0.0696804	0.0771306	0.182533	0.139599	0.225467	0.0586407	0.0512759	0.0660055
36	0.0731994	0.0695001	0.0768988	0.183184	0.140316	0.226052	0.0581385	0.0509945	0.0652824
37	0.0734035	0.0696919	0.0771151	0.183934	0.141033	0.226834	0.0596521	0.0526821	0.0666221
38	0.0727144	0.0690383	0.0763904	0.185148	0.142164	0.228132	0.0595338	0.0527159	0.0663517
39	0.0723247	0.0686603	0.0759891	0.18503	0.141858	0.228202	0.0592807	0.0524952	0.0660662
40	0.0723768	0.0687069	0.0760466	0.185308	0.142109	0.228507	0.059846	0.052843	0.066849
41	0.0723321	0.0686536	0.0760105	0.185116	0.141936	0.228296	0.0581378	0.0510601	0.0652155
42	0.0719259	0.068243	0.0756088	0.18379	0.140682	0.226898	0.058291	0.0510261	0.0655559
43	0.0715258	0.0678087	0.075243	0.183334	0.140099	0.226569	0.0585544	0.0510018	0.0661069
44	0.0714242	0.0676694	0.075179	0.182639	0.139511	0.225767	0.0584231	0.0508429	0.0660034
45	0.0716399	0.0678814	0.0753985	0.182375	0.139102	0.225648	0.0578786	0.0506688	0.0650884
46	0.0721317	0.0683952	0.0758681	0.182125	0.138852	0.225397	0.0573372	0.0503143	0.0643602
47	0.0720925	0.0683454	0.0758397	0.181147	0.138068	0.224226	0.0581287	0.0513896	0.0648677
48	0.0717248	0.0679676	0.075482	0.180557	0.137636	0.223479	0.0565644	0.0497977	0.0633311
49	0.0711208	0.0673774	0.0748643	0.178735	0.135983	0.221487	0.0571371	0.0502579	0.0640163
50	0.0708637	0.0671237	0.0746037	0.180251	0.137301	0.223201	0.0583089	0.0513918	0.065226

## Sheet: B - Sac radial vel. (deg per s)
time	mean_baseline	lowSEM_baseline	upSEM_baseline	mean_toward	lowSEM_toward	upSEM_toward	mean_opposite	lowSEM_opposite	upSEM_opposite
-50	0.912725	0.866187	0.959263	0.786484	0.720997	0.851971	0.816796	0.710046	0.923547
-49	0.951287	0.904499	0.998076	0.775296	0.703917	0.846676	0.768076	0.659755	0.876397
-48	0.960783	0.914989	1.00658	0.781253	0.701087	0.86142	0.724066	0.607651	0.840481
-47	0.939047	0.896326	0.981768	0.804506	0.722663	0.886349	0.746627	0.635666	0.857589
-46	0.891705	0.852257	0.931154	0.812778	0.729408	0.896149	0.772608	0.670963	0.874252
-45	0.834217	0.797593	0.87084	0.808714	0.724648	0.89278	0.798126	0.705855	0.890397
-44	0.789624	0.75468	0.824568	0.808141	0.727448	0.888835	0.821043	0.732842	0.909244
-43	0.76695	0.729593	0.804307	0.79614	0.714671	0.87761	0.856622	0.763238	0.950006
-42	0.782154	0.742687	0.82162	0.808303	0.730418	0.886188	0.875603	0.766441	0.984765
-41	0.824524	0.783591	0.865458	0.823911	0.747524	0.900298	0.905777	0.78788	1.02367
-40	0.860693	0.818098	0.903288	0.826954	0.750325	0.903584	0.914232	0.794861	1.0336
-39	0.879879	0.836644	0.923115	0.814936	0.735605	0.894267	0.902799	0.787482	1.01812
-38	0.869903	0.82602	0.913785	0.806659	0.731454	0.881863	0.898085	0.802148	0.994023
-37	0.847598	0.805322	0.889873	0.80702	0.740268	0.873772	0.873126	0.793442	0.95281
-36	0.815297	0.774804	0.85579	0.814193	0.759336	0.869051	0.837597	0.759603	0.915592
-35	0.797325	0.758815	0.835836	0.808445	0.753256	0.863633	0.811382	0.729406	0.893358
-34	0.800642	0.762539	0.838745	0.797276	0.731	0.863553	0.79693	0.707185	0.886674
-33	0.820544	0.779292	0.861796	0.795487	0.720401	0.870572	0.769234	0.669808	0.86866
-32	0.850561	0.8051	0.896021	0.808088	0.727725	0.88845	0.745478	0.640355	0.850601
-31	0.889497	0.841629	0.937365	0.793572	0.704186	0.882957	0.740638	0.640918	0.840357
-30	0.919056	0.870545	0.967567	0.764339	0.666446	0.862233	0.736747	0.643897	0.829596
-29	0.927071	0.879189	0.974953	0.774367	0.681643	0.867092	0.720756	0.626392	0.815119
-28	0.915261	0.868224	0.962297	0.805125	0.725752	0.884499	0.729477	0.633953	0.825002
-27	0.892756	0.846314	0.939198	0.82723	0.760244	0.894216	0.740547	0.636373	0.844722
-26	0.8791	0.833885	0.924316	0.822353	0.756972	0.887734	0.777021	0.665281	0.88876
-25	0.876138	0.832185	0.920091	0.811967	0.743423	0.880512	0.83824	0.727015	0.949465
-24	0.878591	0.834807	0.922376	0.797309	0.725253	0.869364	0.905364	0.800965	1.00976
-23	0.880586	0.836422	0.92475	0.777329	0.699371	0.855287	0.951435	0.854099	1.04877
-22	0.887295	0.843883	0.930706	0.754654	0.668703	0.840605	0.970568	0.876847	1.06429
-21	0.887212	0.843838	0.930585	0.762042	0.670001	0.854082	0.948312	0.853439	1.04319
-20	0.878547	0.834409	0.922685	0.810265	0.714567	0.905963	0.907599	0.816954	0.998243
-19	0.867809	0.822261	0.913356	0.887918	0.791458	0.984377	0.866286	0.783999	0.948573
-18	0.867866	0.822462	0.913269	0.963336	0.868377	1.05829	0.80539	0.724072	0.886708
-17	0.873951	0.829062	0.918839	1.00794	0.916011	1.09988	0.773518	0.69624	0.850795
-16	0.878164	0.833162	0.923166	0.996956	0.907805	1.08611	0.777214	0.701376	0.853051
-15	0.890631	0.845504	0.935758	0.940769	0.853323	1.02822	0.802842	0.719686	0.885999
-14	0.904624	0.858739	0.950509	0.885951	0.806835	0.965067	0.854083	0.765197	0.94297
-13	0.922167	0.87526	0.969074	0.814047	0.731923	0.89617	0.894064	0.791886	0.996241
-12	0.953983	0.908309	0.999657	0.794655	0.711235	0.878075	0.92818	0.814869	1.04149
-11	0.971611	0.925869	1.01735	0.836618	0.755363	0.917873	0.948947	0.830748	1.06715
-10	0.974974	0.92748	1.02247	0.885809	0.799995	0.971624	0.944522	0.82041	1.06863
-9	0.967216	0.916607	1.01782	0.930358	0.840872	1.01984	0.926665	0.803306	1.05002
-8	0.954225	0.898934	1.00952	0.963279	0.868381	1.05818	0.939396	0.831137	1.04765
-7	0.962375	0.902919	1.02183	0.972272	0.868903	1.07564	0.955323	0.857051	1.05359
-6	1.01164	0.950222	1.07306	1.01525	0.911357	1.11914	0.974893	0.874462	1.07532
-5	1.08927	1.02823	1.1503	1.0563	0.951648	1.16096	0.998639	0.878167	1.11911
-4	1.17114	1.11359	1.22869	1.07488	0.962351	1.1874	1.02934	0.892389	1.16629
-3	1.20282	1.1491	1.25655	1.10766	1.00076	1.21456	1.05746	0.918551	1.19638
-2	1.13836	1.08614	1.19058	1.10449	1.0051	1.20388	1.03803	0.912301	1.16376
-1	0.967289	0.914365	1.02021	1.00728	0.901221	1.11334	0.919917	0.812517	1.02732
0	0.794936	0.743805	0.846068	0.859669	0.740994	0.978344	0.78703	0.693489	0.880571
1	0.944216	0.898078	0.990353	0.975076	0.8704	1.07975	0.94752	0.853166	1.04187
2	1.53002	1.4762	1.58385	1.51009	1.41626	1.60392	1.56551	1.43675	1.69427
3	2.45697	2.38766	2.52628	2.36532	2.18916	2.54147	2.50761	2.32684	2.68837
4	3.57416	3.47692	3.67139	3.75121	3.51171	3.99071	3.62961	3.37875	3.88048
5	4.78176	4.64347	4.92005	5.46326	5.10232	5.8242	4.82405	4.48409	5.16401
6	5.98494	5.79561	6.17428	7.35871	6.779	7.93843	5.99157	5.54671	6.43643
7	7.093	6.84695	7.33904	9.31598	8.43127	10.2007	7.03458	6.4784	7.59076
8	8.01518	7.71151	8.31886	11.2098	9.95396	12.4656	7.86434	7.20128	8.52741
9	8.67848	8.32111	9.03585	12.9087	11.2397	14.5777	8.40938	7.65464	9.16411
10	9.03391	8.63218	9.43565	14.2843	12.1897	16.3789	8.62804	7.80623	9.44984
11	9.05599	8.62324	9.48875	15.2499	12.7498	17.7499	8.51744	7.65841	9.37648
12	8.76571	8.31914	9.21228	15.7445	12.8909	18.598	8.09229	7.22837	8.95621
13	8.19258	7.74931	8.63585	15.7345	12.6022	18.8667	7.41237	6.57226	8.25248
14	7.39773	6.97413	7.82133	15.221	11.9018	18.5402	6.53314	5.73794	7.32834
15	6.48425	6.09791	6.87059	14.2628	10.8602	17.6655	5.65296	4.95136	6.35456
16	5.56263	5.22938	5.89588	12.9728	9.59347	16.3521	4.7949	4.1983	5.3915
17	4.6916	4.41637	4.96682	11.5846	8.34118	14.8281	4.13343	3.67177	4.59508
18	3.92328	3.69745	4.14911	10.4998	7.51776	13.4819	3.70063	3.37035	4.03092
19	3.34417	3.14994	3.53841	9.57787	6.93084	12.2249	3.3517	3.03383	3.66957
20	3.08146	2.90664	3.25628	8.74446	6.46851	11.0204	3.19143	2.81789	3.56496
21	3.12341	2.96011	3.28671	7.96039	6.06043	9.86035	3.38813	3.00992	3.76633
22	3.27579	3.10984	3.44174	7.19325	5.64922	8.73729	3.68734	3.3129	4.06179
23	3.45666	3.28455	3.62877	6.41886	5.18791	7.6498	3.94941	3.5733	4.32552
24	3.60442	3.42855	3.7803	5.62842	4.64946	6.60739	4.0869	3.69613	4.47767
25	3.67392	3.49624	3.85159	4.86298	4.06451	5.66146	4.07902	3.66974	4.4883
26	3.6506	3.47188	3.82931	4.31272	3.64548	4.97997	3.93285	3.50978	4.35592
27	3.54613	3.36815	3.72411	4.00308	3.41478	4.59138	3.6589	3.23465	4.08316
28	3.3881	3.21587	3.56033	3.80892	3.21826	4.39958	3.30549	2.89725	3.71373
29	3.19654	3.03599	3.35709	3.61714	2.94433	4.28995	2.91164	2.53785	3.28543
30	2.93472	2.78409	3.08535	3.41629	2.6212	4.21137	2.47535	2.13516	2.81554
31	2.62386	2.48269	2.76503	3.28411	2.37122	4.19699	2.05929	1.75335	2.36523
32	2.28988	2.15906	2.4207	3.22569	2.21313	4.23825	1.72705	1.46416	1.98993
33	1.96287	1.84432	2.08142	3.1812	2.09333	4.26906	1.50788	1.28734	1.72843
34	1.68108	1.57813	1.78402	3.15953	2.02789	4.29117	1.38986	1.20947	1.57026
35	1.44886	1.36181	1.53592	3.12081	1.97893	4.26269	1.31623	1.16252	1.46994
36	1.27029	1.19549	1.34508	3.05057	1.93023	4.17091	1.25614	1.11706	1.39522
37	1.15631	1.09023	1.2224	2.92753	1.85582	3.99925	1.19838	1.07078	1.32597
38	1.10385	1.04286	1.16485	2.76114	1.76186	3.76041	1.11835	0.99488	1.24183
39	1.07685	1.01625	1.13745	2.55942	1.64824	3.47061	1.01089	0.883518	1.13826
40	1.08622	1.02713	1.1453	2.34335	1.53015	3.15654	0.961287	0.847681	1.07489
41	1.10551	1.05093	1.16009	2.14964	1.43766	2.86162	0.955249	0.863364	1.04713
42	1.11111	1.06111	1.16112	1.94693	1.33063	2.56322	0.939398	0.842371	1.03642
43	1.08354	1.0354	1.13168	1.7391	1.20848	2.26972	0.930369	0.815189	1.04555
44	1.03384	0.985235	1.08244	1.55516	1.10091	2.00941	0.980043	0.864874	1.09521
45	0.980216	0.930552	1.02988	1.40484	1.02123	1.78846	1.03857	0.933893	1.14326
46	0.944746	0.896529	0.992962	1.26904	0.948439	1.58964	1.04457	0.943944	1.14521
47	0.925524	0.879951	0.971097	1.15589	0.894691	1.4171	0.995947	0.895734	1.09616
48	0.911971	0.868647	0.955294	1.04328	0.834363	1.25219	0.929229	0.835228	1.02323
49	0.89196	0.849572	0.934348	0.946201	0.781601	1.1108	0.844227	0.750381	0.938073
50	0.86963	0.827879	0.911382	0.889437	0.762853	1.01602	0.781444	0.683611	0.879278

## Sheet: C - Peak firing rate (spk p s)
peak_FR_nosac	peak_FR_wtsac	task	task legend
142.481	164.381	1	1=contrast task
50.1172	38.7829	1	2=contrast taks - shared neurons
101.107	102.474	1	3= spatial frequency task
97.745	113.579	1	4=spatial frequency stask neurons
150.317	148.224	1
200.442	208.521	1
32.3326	44.0877	1
222.374	254.533	1
114.379	89.3524	1
57.6814	58.8437	1
49.5797	25.4966	1
136.273	134.961	1
90.6764	94.6031	1
15.525	14.7933	1
84.4732	88.3367	1
43.3077	37.6455	1
19.2327	16.9202	1
68.6092	48.7695	1
239.669	251.029	1
176.737	181.951	1
60.332	41.2366	1
58.9999	40.7009	1
68.8178	63.234	1
65.1146	51.2784	1
32.3324	32.8921	1
129.825	120.534	1
135.353	110.79	1
39.302	33.8372	1
37.9501	31.5859	1
36.4408	27.3862	1
113.85	95.1294	1
65.5474	50.8639	1
21.9627	40.6209	1
174.599	187.241	1
12.3572	27.9319	1
46.4474	41.2566	1
86.0825	88.2308	1
91.389	109.498	1
9.1232	38.7264	1
83.8405	83.812	1
181.762	164.691	1
100.319	112.358	1
57.2287	53.8518	1
293.577	294.405	1
116.038	117.481	1
158.797	169.575	1
256.227	249.486	1
226.276	222.647	1
251.924	278.904	1
237.673	181.972	1
94.8672	100.613	1
139.975	148.042	1
145.377	148.074	1
161.798	145.564	1
242.166	212.959	1
222.196	216.468	1
160.413	172.697	1
229.639	210.127	1
160.299	159.812	1
79.9094	72.8209	1
144.488	140.7	1
130.733	105.596	1
123.221	138.489	1
121.293	95.4667	1
144.357	122.38	1
220.443	198.333	1
68.418	38.6266	1
89.4299	81.0849	1
135.159	111.296	1
248.6	284.864	1
73.854	63.2874	1
66.3999	60.0461	1
25.0146	28.837	1
29.8782	35.0036	1
182.165	187.138	2
264.009	317.729	2
135.681	133.872	2
140.615	156.683	2
150.098	150.284	2
215.432	212.106	2
333.051	280.283	2
204.466	188.062	2
162.752	164.55	2
227.154	206.8	2
294.665	264.239	2
199.864	222.118	3
289.246	291.46	3
268.19	237.78	3
146.599	148.021	3
60.9091	39.1614	3
309.475	316.883	3
74.4216	50.1751	3
189.188	187.144	3
52.1885	54.1431	3
171.95	244.741	3
128.488	117.22	3
339.523	340.562	3
208.668	194.494	3
64.5738	66.3222	3
53.1107	35.0247	3
362.427	279.783	3
284.221	319.421	3
39.2759	39.9302	3
251.128	259.168	3
134.228	127.133	3
255.678	224.436	3
52.7049		3
107.902		3
102.31	124.189	3
61.8189	43.5918	3
164.841	178.662	3
274.138	169.602	3
125.128	105.083	3
308.461	209.657	3
226.936	179.4	3
126.999	39.8942	3
188.88	79.3905	3
118.438	79.5938	3
95.9405	41.273	3
212.686	106.469	3
45.5297	63.5463	3
38.6006	54.6948	3
106.49	93.7192	3
407.318	466.811	3
109.693	178.487	3
227.753	218.984	3
191.467	141.317	3
122.823	139.747	3
226.921	254.346	3
178.209	181.285	4
348.309	309.087	4
157.162	166.521	4
249.055	255.739	4
124.622	129.643	4
186.235	151.218	4
518.913	483.631	4
247.348	277.232	4
154.749	150.619	4
278.455	277.323	4
248.883	214.869	4
