# Supplementary material for: Instantaneous movement-unrelated midbrain activity modifies ongoing eye movements
Source: eLife. 2021 May 6;10:e64150. doi: 10.7554/eLife.64150 (PMC8143798; doi:10.7554/eLife.64150)
Supplement: Figure 3—figure supplement 1—source data 1. [file elife-64150-fig3-figsupp1-data1.xlsx]

## Sheet: A - Saccade amplitude (deg)
time	mean_low	low95CI_low	up95CI_low	mean_medium	low95CI_medium	up95CI_medium	mean_high	low95CI_high	up95CI_high
-95	0.117373	0.111627	0.12312	0.117926	0.112115	0.123737	0.121849	0.11287	0.130827
-85	0.118645	0.113671	0.12362	0.119479	0.114405	0.124553	0.124242	0.117181	0.131303
-75	0.118659	0.114259	0.123059	0.118691	0.114266	0.123116	0.123304	0.117372	0.129237
-65	0.119897	0.115554	0.124241	0.118811	0.114341	0.123281	0.120617	0.116193	0.125041
-55	0.122342	0.118113	0.126572	0.121298	0.116885	0.12571	0.122675	0.118336	0.127014
-45	0.123733	0.119485	0.127981	0.120894	0.11654	0.125247	0.122328	0.118206	0.12645
-35	0.12176	0.117716	0.125804	0.121793	0.116794	0.126791	0.11964	0.115574	0.123706
-25	0.122877	0.118619	0.127135	0.121999	0.116887	0.12711	0.119156	0.115274	0.123038
-15	0.122138	0.117819	0.126458	0.118802	0.114029	0.123575	0.120461	0.116647	0.124276
-5	0.120617	0.116198	0.125035	0.117173	0.112252	0.122094	0.119007	0.115117	0.122896
5	0.118786	0.114248	0.123324	0.117847	0.112583	0.123111	0.12043	0.115913	0.124946
15	0.121942	0.116889	0.126996	0.118707	0.113709	0.123706	0.124994	0.118754	0.131235
25	0.122485	0.117252	0.127717	0.122141	0.116345	0.127936	0.130153	0.122961	0.137346
35	0.12397	0.118326	0.129614	0.134946	0.124066	0.145826	0.14653	0.131961	0.1611
45	0.12535	0.119122	0.131578	0.14342	0.130342	0.156497	0.163199	0.144195	0.182203
55	0.128428	0.121583	0.135272	0.153522	0.136676	0.170369	0.192943	0.166098	0.219787
65	0.129235	0.12186	0.136609	0.164371	0.141294	0.187448	0.244488	0.204298	0.284678
75	0.130624	0.122152	0.139096	0.179508	0.146947	0.212069	0.308961	0.248335	0.369587
85	0.130716	0.121346	0.140085	0.16942	0.138709	0.200132	0.283301	0.225508	0.341095
95	0.129285	0.119829	0.138741	0.152702	0.128434	0.176971	0.211981	0.172588	0.251374
105	0.125676	0.11694	0.134413	0.130742	0.116897	0.144586	0.157582	0.13383	0.181333
115	0.119545	0.111824	0.127266	0.122601	0.112465	0.132737	0.121463	0.110715	0.132211
125	0.115445	0.109518	0.121371	0.117749	0.10974	0.125758	0.11166	0.106887	0.116434
135	0.114681	0.108386	0.120976	0.11474	0.108398	0.121083	0.110921	0.105828	0.116015
145	0.114332	0.107617	0.121047	0.111712	0.104778	0.118645	0.109505	0.103686	0.115325

## Sheet: B - Normalized firing rate
time	mean_low	low95CI_low	up95CI_low	mean_medium	low95CI_medium	up95CI_medium	mean_high	low95CI_high	up95CI_high
-100	0.0114894	0.00598771	0.016991	0.00945848	0.00361673	0.0153002	0.00960319	0.00420543	0.0150009
-99	0.0114622	0.00599317	0.0169312	0.00947506	0.00364455	0.0153056	0.00954808	0.00417493	0.0149212
-98	0.0114205	0.00598307	0.0168579	0.009496	0.00367792	0.0153141	0.00949269	0.00414411	0.0148413
-97	0.0113747	0.00596627	0.0167831	0.00952214	0.00371518	0.0153291	0.009444	0.004122	0.014766
-96	0.0113258	0.00594192	0.0167098	0.00954943	0.00375503	0.0153438	0.00940384	0.0041041	0.0147036
-95	0.0112662	0.00590254	0.0166299	0.00958735	0.00380101	0.0153737	0.00936441	0.00408857	0.0146402
-94	0.0112057	0.00585801	0.0165535	0.00962645	0.00385168	0.0154012	0.00932828	0.0040755	0.0145811
-93	0.0111417	0.00580443	0.016479	0.00966679	0.00390298	0.0154306	0.009296	0.0040677	0.0145243
-92	0.0110782	0.00574446	0.016412	0.00971254	0.00395812	0.015467	0.00926499	0.00406086	0.0144691
-91	0.0110113	0.00567959	0.016343	0.00975994	0.00401537	0.0155045	0.00924266	0.00406032	0.014425
-90	0.0109456	0.00561262	0.0162786	0.00980497	0.0040716	0.0155383	0.00922187	0.00406104	0.0143827
-89	0.0108786	0.00554074	0.0162165	0.00984954	0.00412779	0.0155713	0.00920664	0.00406831	0.014345
-88	0.0108155	0.00546901	0.016162	0.00989569	0.00418391	0.0156075	0.00919651	0.00407692	0.0143161
-87	0.0107511	0.005395	0.0161072	0.00993654	0.00423516	0.0156379	0.00919227	0.00408823	0.0142963
-86	0.0106861	0.00531981	0.0160525	0.00998458	0.00429291	0.0156762	0.00918684	0.00409971	0.014274
-85	0.0106231	0.00524617	0.016	0.0100269	0.00434509	0.0157086	0.00918217	0.00410977	0.0142546
-84	0.0105632	0.0051752	0.0159513	0.0100674	0.00439248	0.0157423	0.00919007	0.00412995	0.0142502
-83	0.0105027	0.00510538	0.0159	0.0101065	0.00443748	0.0157756	0.00920622	0.00415478	0.0142576
-82	0.010444	0.00503705	0.015851	0.0101437	0.00447737	0.01581	0.00922897	0.00418468	0.0142732
-81	0.0103848	0.00496911	0.0158004	0.0101785	0.00451681	0.0158401	0.00925537	0.00421402	0.0142967
-80	0.0103339	0.00490765	0.01576	0.0102077	0.0045524	0.0158629	0.00929088	0.00425022	0.0143315
-79	0.0102867	0.00485113	0.0157223	0.0102384	0.00458474	0.015892	0.00933838	0.00429065	0.0143861
-78	0.0102406	0.00479528	0.0156859	0.0102613	0.00461016	0.0159123	0.00938714	0.00433179	0.0144425
-77	0.0102012	0.00474279	0.0156597	0.0102835	0.00463588	0.0159312	0.00944799	0.00437741	0.0145186
-76	0.0101592	0.00469033	0.015628	0.0102974	0.00465377	0.0159411	0.00952114	0.00442638	0.0146159
-75	0.0101315	0.00464898	0.015614	0.0103088	0.00467097	0.0159466	0.00959471	0.00447419	0.0147152
-74	0.0101092	0.00461172	0.0156066	0.0103161	0.00468458	0.0159476	0.00967304	0.00452072	0.0148254
-73	0.0100902	0.00457579	0.0156047	0.0103182	0.00469545	0.015941	0.0097619	0.00456998	0.0149538
-72	0.0100831	0.00454686	0.0156194	0.0103144	0.00470189	0.0159268	0.00985688	0.00461856	0.0150952
-71	0.0100805	0.00451667	0.0156443	0.0103058	0.00470655	0.015905	0.00995051	0.00466443	0.0152366
-70	0.0100892	0.00449529	0.0156831	0.0102953	0.00470862	0.0158819	0.0100503	0.00470818	0.0153923
-69	0.0100976	0.00447368	0.0157215	0.0102815	0.00471134	0.0158517	0.0101528	0.00475248	0.0155531
-68	0.0101153	0.00445629	0.0157743	0.0102677	0.00471342	0.0158219	0.010249	0.00478886	0.0157091
-67	0.0101397	0.00444318	0.0158363	0.0102535	0.0047137	0.0157933	0.0103471	0.00482203	0.0158721
-66	0.0101628	0.004428	0.0158977	0.0102436	0.00472024	0.015767	0.0104446	0.00485458	0.0160347
-65	0.0101923	0.00441569	0.015969	0.0102312	0.00472381	0.0157386	0.0105313	0.00487862	0.0161839
-64	0.0102267	0.00440866	0.0160448	0.0102221	0.00472875	0.0157154	0.0106132	0.00489789	0.0163285
-63	0.0102593	0.00440205	0.0161165	0.0102146	0.00473648	0.0156928	0.0106865	0.00491292	0.0164601
-62	0.0102958	0.00439803	0.0161936	0.0102147	0.00474759	0.0156817	0.010744	0.0049209	0.016567
-61	0.0103254	0.00438899	0.0162619	0.0102216	0.00476444	0.0156788	0.0107942	0.00492445	0.016664
-60	0.0103572	0.00438678	0.0163276	0.0102378	0.00479002	0.0156855	0.0108277	0.00492262	0.0167328
-59	0.0103859	0.00438334	0.0163884	0.0102591	0.00481485	0.0157033	0.0108507	0.00491577	0.0167856
-58	0.0104091	0.00438046	0.0164378	0.0102909	0.00485027	0.0157315	0.010863	0.00490477	0.0168212
-57	0.0104304	0.00438107	0.0164798	0.0103299	0.00489001	0.0157697	0.0108608	0.00488987	0.0168317
-56	0.0104448	0.00437988	0.0165097	0.0103801	0.00493653	0.0158237	0.0108468	0.00487092	0.0168226
-55	0.0104641	0.00438693	0.0165412	0.0104382	0.00499022	0.0158861	0.0108185	0.0048473	0.0167896
-54	0.010475	0.00439483	0.0165551	0.0104991	0.00504595	0.0159523	0.0107802	0.00482125	0.0167391
-53	0.0104816	0.00440206	0.0165612	0.010571	0.00510975	0.0160322	0.0107303	0.00479213	0.0166684
-52	0.0104843	0.0044122	0.0165563	0.0106467	0.00517379	0.0161196	0.0106715	0.00475976	0.0165832
-51	0.0104821	0.00442399	0.0165402	0.0107294	0.00524115	0.0162176	0.0106026	0.00472333	0.0164819
-50	0.0104755	0.00443529	0.0165156	0.0108144	0.00530918	0.0163197	0.0105328	0.00468946	0.0163762
-49	0.0104667	0.00445008	0.0164834	0.0109025	0.00537719	0.0164279	0.0104511	0.00464883	0.0162534
-48	0.010454	0.00446594	0.0164421	0.0109947	0.00544667	0.0165427	0.0103672	0.00460804	0.0161263
-47	0.0104447	0.0044846	0.0164048	0.0110863	0.00550874	0.016664	0.0102805	0.00456616	0.0159949
-46	0.0104298	0.00450309	0.0163565	0.0111867	0.00557287	0.0168006	0.0101955	0.00452434	0.0158667
-45	0.0104181	0.00452531	0.0163109	0.0112836	0.00563144	0.0169357	0.0101124	0.00448469	0.01574
-44	0.0104066	0.00454823	0.016265	0.0113785	0.00568595	0.0170711	0.010035	0.00444672	0.0156233
-43	0.0103914	0.00457133	0.0162115	0.0114709	0.00573278	0.0172091	0.00995921	0.00440764	0.0155108
-42	0.0103762	0.00459359	0.0161587	0.0115594	0.005772	0.0173469	0.00988471	0.00436718	0.0154022
-41	0.0103638	0.00461781	0.0161097	0.0116445	0.00580348	0.0174854	0.00981992	0.00433209	0.0153078
-40	0.0103533	0.00464219	0.0160645	0.0117218	0.00582554	0.0176181	0.00976384	0.00429929	0.0152284
-39	0.010341	0.00466621	0.0160158	0.0117952	0.00583948	0.0177509	0.00971601	0.00426824	0.0151638
-38	0.0103267	0.0046888	0.0159645	0.0118595	0.00584372	0.0178753	0.00967271	0.00423872	0.0151067
-37	0.0103159	0.0047089	0.0159228	0.0119171	0.00583765	0.0179966	0.00963477	0.00421161	0.0150579
-36	0.0103056	0.00473155	0.0158796	0.0119668	0.00582433	0.0181094	0.00960563	0.00418873	0.0150225
-35	0.0102969	0.00475108	0.0158427	0.0120054	0.00579986	0.018211	0.00958242	0.0041678	0.014997
-34	0.0102945	0.00477331	0.0158156	0.0120346	0.0057682	0.0183011	0.00956386	0.00414657	0.0149811
-33	0.0102948	0.00479477	0.0157948	0.0120491	0.00572668	0.0183715	0.00955033	0.00412997	0.0149707
-32	0.0102903	0.00481038	0.0157703	0.0120541	0.0056764	0.0184317	0.00953664	0.00411367	0.0149596
-31	0.0102903	0.00482435	0.0157563	0.0120442	0.00561939	0.0184689	0.00952494	0.00410095	0.0149489
-30	0.010294	0.00483889	0.0157491	0.0120241	0.00555729	0.0184908	0.00951395	0.00409069	0.0149372
-29	0.0102981	0.00484953	0.0157466	0.0119907	0.00549013	0.0184912	0.00950484	0.00408362	0.0149261
-28	0.0103073	0.0048633	0.0157513	0.0119483	0.00542019	0.0184763	0.00949256	0.00407923	0.0149059
-27	0.0103176	0.00487459	0.0157606	0.011887	0.00534275	0.0184312	0.00948519	0.00407851	0.0148919
-26	0.010328	0.00488298	0.015773	0.0118169	0.0052668	0.0183671	0.00947646	0.00408094	0.014872
-25	0.0103386	0.00488689	0.0157902	0.011739	0.0051906	0.0182873	0.00945986	0.00408056	0.0148392
-24	0.0103502	0.00489114	0.0158092	0.0116566	0.00511904	0.0181941	0.00944455	0.00408506	0.014804
-23	0.0103617	0.00489427	0.0158291	0.011566	0.00504762	0.0180844	0.00942376	0.00408948	0.014758
-22	0.0103726	0.00489614	0.015849	0.0114714	0.00497942	0.0179633	0.00939806	0.00409413	0.014702
-21	0.0103853	0.00489914	0.0158715	0.0113737	0.00491653	0.0178308	0.00937517	0.0041022	0.0146482
-20	0.0103994	0.0049024	0.0158965	0.011273	0.00485454	0.0176914	0.0093479	0.00410895	0.0145868
-19	0.0104119	0.0049038	0.01592	0.0111722	0.004798	0.0175463	0.00932093	0.00411708	0.0145248
-18	0.0104287	0.00491128	0.0159461	0.0110681	0.00474135	0.0173949	0.00929528	0.00412361	0.014467
-17	0.0104473	0.00492115	0.0159735	0.0109723	0.00469318	0.0172515	0.00926964	0.00413012	0.0144092
-16	0.0104587	0.00492756	0.0159899	0.0108845	0.00465278	0.0171162	0.00925076	0.00413672	0.0143648
-15	0.0104782	0.00494242	0.0160139	0.0108021	0.00461705	0.0169871	0.00923754	0.00414471	0.0143304
-14	0.0104938	0.00495342	0.0160342	0.0107238	0.00458513	0.0168625	0.00922947	0.00415184	0.0143071
-13	0.0105054	0.00496532	0.0160455	0.0106553	0.00455964	0.016751	0.0092276	0.00415805	0.0142971
-12	0.0105182	0.00497984	0.0160567	0.0105954	0.00453926	0.0166515	0.00923337	0.00416298	0.0143038
-11	0.0105326	0.00499918	0.0160661	0.0105441	0.0045255	0.0165628	0.00924785	0.0041698	0.0143259
-10	0.0105464	0.00501677	0.016076	0.0105035	0.00451817	0.0164888	0.00926701	0.00417303	0.014361
-9	0.010559	0.00503639	0.0160816	0.0104684	0.00451441	0.0164225	0.00930149	0.00418097	0.014422
-8	0.0105727	0.00505755	0.0160879	0.0104464	0.004521	0.0163719	0.00933929	0.00418676	0.0144918
-7	0.0105882	0.00507985	0.0160966	0.010433	0.00453097	0.0163351	0.00938103	0.0041914	0.0145707
-6	0.0106036	0.005104	0.0161031	0.0104332	0.0045473	0.0163191	0.00943066	0.00419917	0.0146622
-5	0.0106193	0.00512641	0.0161122	0.0104363	0.00456743	0.0163051	0.00948864	0.00420941	0.0147679
-4	0.010639	0.00515116	0.0161268	0.0104467	0.004591	0.0163024	0.00955352	0.00422251	0.0148845
-3	0.0106646	0.00518067	0.0161486	0.0104612	0.004619	0.0163034	0.00962268	0.00423626	0.0150091
-2	0.0106913	0.00520878	0.0161737	0.0104807	0.00465025	0.0163112	0.00969547	0.00425206	0.0151389
-1	0.0107178	0.00523579	0.0161998	0.0105036	0.00468065	0.0163265	0.00977518	0.00427361	0.0152767
0	0.0107501	0.0052663	0.016234	0.0105318	0.00471734	0.0163463	0.00986306	0.00430676	0.0154194
1	0.0107823	0.00529419	0.0162705	0.0105583	0.004753	0.0163635	0.00996379	0.00435466	0.0155729
2	0.0108216	0.00532177	0.0163214	0.0105887	0.00479431	0.016383	0.0100919	0.00443298	0.0157508
3	0.0108628	0.00535093	0.0163747	0.010632	0.00484763	0.0164164	0.0102331	0.0045272	0.015939
4	0.0109035	0.00537534	0.0164316	0.0106766	0.0049004	0.0164528	0.0104211	0.0046696	0.0161726
5	0.0109487	0.00539888	0.0164986	0.0107418	0.0049761	0.0165076	0.0106602	0.00486281	0.0164576
6	0.0110015	0.00542569	0.0165773	0.0108287	0.00507089	0.0165865	0.0109803	0.00513305	0.0168276
7	0.0110563	0.00545076	0.0166619	0.0109382	0.00519026	0.0166861	0.0114082	0.00550798	0.0173084
8	0.0111106	0.00547136	0.0167499	0.0110793	0.00533899	0.0168196	0.0120256	0.00606036	0.0179909
9	0.0111655	0.00549114	0.0168399	0.0112641	0.00552651	0.0170016	0.0129002	0.00684182	0.0189586
10	0.0112297	0.0055131	0.0169463	0.0115305	0.00578875	0.0172722	0.0140621	0.00786396	0.0202601
11	0.011296	0.00553523	0.0170568	0.0118588	0.00610404	0.0176136	0.0156134	0.00919249	0.0220342
12	0.0113657	0.00555921	0.0171721	0.0123065	0.0065301	0.0180828	0.0175734	0.0108196	0.0243273
13	0.0114409	0.00558524	0.0172965	0.0128673	0.00704267	0.0186919	0.0200015	0.0127647	0.0272382
14	0.0115306	0.00562131	0.0174398	0.0135989	0.0076917	0.0195062	0.0229859	0.0150819	0.03089
15	0.011625	0.00566268	0.0175873	0.0145412	0.00849888	0.0205835	0.0266278	0.0178436	0.0354119
16	0.011746	0.00572535	0.0177667	0.0157003	0.00944875	0.0219519	0.0310266	0.0211206	0.0409325
17	0.0118882	0.00580906	0.0179673	0.0171338	0.0105818	0.0236859	0.0363076	0.0250248	0.0475903
18	0.0120563	0.00592135	0.0181912	0.018878	0.0119025	0.0258535	0.042633	0.0297065	0.0555595
19	0.0122624	0.00606727	0.0184575	0.0210002	0.0134504	0.0285499	0.0501593	0.0353077	0.065011
20	0.0125205	0.00626404	0.018777	0.0235458	0.015247	0.0318446	0.0589466	0.0418844	0.0760088
21	0.0128534	0.0065292	0.0191777	0.0265917	0.0173485	0.035835	0.0691694	0.0496096	0.0887291
22	0.0132607	0.00686141	0.01966	0.0301883	0.0197914	0.0405851	0.0809977	0.0586641	0.103331
23	0.0137558	0.00726756	0.020244	0.0344205	0.0226516	0.0461895	0.0944886	0.0691026	0.119874
24	0.0143667	0.00776909	0.0209643	0.0393499	0.0259958	0.052704	0.109775	0.0810864	0.138464
25	0.015108	0.00837486	0.0218411	0.0450532	0.0298924	0.060214	0.126886	0.094672	0.1591
26	0.0159997	0.00908813	0.0229113	0.0516217	0.0344312	0.0688121	0.14591	0.109975	0.181845
27	0.0170968	0.00995435	0.0242392	0.0591044	0.0396748	0.078534	0.166908	0.127097	0.206719
28	0.0184114	0.0109662	0.0258565	0.0675802	0.0457169	0.0894434	0.189839	0.146045	0.233632
29	0.0199525	0.0121205	0.0277844	0.0771083	0.052623	0.101594	0.214673	0.166839	0.262508
30	0.021792	0.0134726	0.0301114	0.0877532	0.0604888	0.115018	0.241332	0.189474	0.29319
31	0.0239283	0.0150008	0.0328558	0.0995726	0.0693891	0.129756	0.269699	0.213887	0.325511
32	0.0264299	0.0167595	0.0361004	0.112559	0.0793396	0.145779	0.299561	0.239934	0.359188
33	0.0293237	0.0187658	0.0398815	0.126741	0.090406	0.163077	0.330725	0.267479	0.393971
34	0.0326566	0.0210624	0.0442508	0.14213	0.102633	0.181626	0.362939	0.296344	0.429533
35	0.0364679	0.0236771	0.0492587	0.158701	0.11604	0.201361	0.395945	0.326331	0.46556
36	0.0407804	0.0266378	0.0549229	0.176425	0.130629	0.222221	0.429421	0.357174	0.501668
37	0.0456448	0.0299917	0.0612979	0.19524	0.146388	0.244092	0.463076	0.388634	0.537517
38	0.0511155	0.0337995	0.0684315	0.215084	0.163288	0.266879	0.496501	0.420311	0.572691
39	0.0571811	0.0380588	0.0763034	0.235852	0.181262	0.290442	0.529423	0.451975	0.606871
40	0.0639538	0.0428905	0.0850172	0.257426	0.200231	0.314621	0.561492	0.483278	0.639707
41	0.0713564	0.0482186	0.0944941	0.279681	0.220096	0.339265	0.592354	0.513857	0.670851
42	0.0795063	0.0541855	0.104827	0.3025	0.240771	0.364228	0.621763	0.543441	0.700084
43	0.0883639	0.0607636	0.115964	0.325678	0.262068	0.389289	0.649407	0.571671	0.727144
44	0.0979666	0.0680064	0.127927	0.349067	0.283854	0.414279	0.675059	0.598267	0.751851
45	0.10831	0.075934	0.140686	0.372504	0.305979	0.439028	0.698543	0.622996	0.77409
46	0.119369	0.0845326	0.154206	0.395822	0.32827	0.463374	0.719669	0.645583	0.793754
47	0.131149	0.0938433	0.168455	0.418835	0.35055	0.48712	0.738332	0.665836	0.810829
48	0.143584	0.103804	0.183364	0.441343	0.372579	0.510107	0.754476	0.68361	0.825342
49	0.156676	0.114451	0.1989	0.463198	0.394208	0.532189	0.768024	0.698729	0.837319
50	0.170335	0.125711	0.21496	0.484249	0.415255	0.553243	0.77898	0.711112	0.846849
51	0.184524	0.137561	0.231487	0.504327	0.435522	0.573132	0.787392	0.720719	0.854065
52	0.199163	0.149946	0.24838	0.523265	0.454798	0.591731	0.793351	0.72758	0.859121
53	0.214168	0.162799	0.265536	0.54094	0.472927	0.608954	0.79688	0.73166	0.8621
54	0.229433	0.176017	0.282848	0.557247	0.48976	0.624735	0.79814	0.733106	0.863174
55	0.244867	0.189537	0.300197	0.572061	0.505122	0.639	0.797214	0.731987	0.862441
56	0.260422	0.203321	0.317523	0.585324	0.51892	0.651727	0.794229	0.728456	0.860002
57	0.275939	0.217215	0.334663	0.596955	0.531023	0.662887	0.789314	0.722678	0.85595
58	0.291327	0.231132	0.351521	0.606918	0.541364	0.672471	0.782645	0.714892	0.850398
59	0.306458	0.244957	0.367959	0.615157	0.549848	0.680467	0.774296	0.705226	0.843366
60	0.321231	0.258586	0.383876	0.621656	0.556425	0.686887	0.764427	0.693915	0.83494
61	0.335552	0.271926	0.399178	0.626396	0.561055	0.691736	0.753175	0.681149	0.825202
62	0.349311	0.284855	0.413768	0.629414	0.563762	0.695066	0.740652	0.667118	0.814186
63	0.362434	0.297308	0.42756	0.630709	0.56454	0.696877	0.72697	0.651975	0.801965
64	0.374833	0.309186	0.44048	0.630324	0.563449	0.697199	0.712233	0.635863	0.788603
65	0.386377	0.320329	0.452425	0.628319	0.560565	0.696074	0.696543	0.618924	0.774162
66	0.397057	0.330737	0.463377	0.624737	0.555958	0.693516	0.680014	0.601294	0.758735
67	0.406795	0.340307	0.473283	0.619684	0.549771	0.689598	0.662702	0.583033	0.742372
68	0.415537	0.34896	0.482113	0.613224	0.542108	0.684339	0.644728	0.564272	0.725184
69	0.423241	0.356636	0.489846	0.605401	0.533058	0.677743	0.626233	0.54515	0.707316
70	0.429875	0.363279	0.49647	0.596374	0.522821	0.669927	0.607277	0.525712	0.688842
71	0.435433	0.368859	0.502006	0.586195	0.511487	0.660904	0.588036	0.506124	0.669948
72	0.439916	0.373345	0.506486	0.575015	0.49924	0.65079	0.568623	0.486465	0.650781
73	0.443303	0.376709	0.509897	0.562908	0.486179	0.639636	0.549119	0.466799	0.631439
74	0.445635	0.378962	0.512308	0.549986	0.47245	0.627523	0.5296	0.447193	0.612007
75	0.44692	0.380096	0.513743	0.536396	0.458215	0.614576	0.510186	0.427734	0.592638
76	0.447174	0.38012	0.514228	0.522239	0.443581	0.600896	0.490944	0.408465	0.573424
77	0.446431	0.379069	0.513793	0.507636	0.428669	0.586604	0.47194	0.389427	0.554454
78	0.444749	0.376998	0.512501	0.49268	0.413572	0.571787	0.453257	0.370697	0.535818
79	0.442152	0.373938	0.510366	0.477484	0.398393	0.556576	0.435034	0.352422	0.517647
80	0.438696	0.369965	0.507427	0.46215	0.383203	0.541097	0.417314	0.334633	0.499994
81	0.434444	0.365157	0.50373	0.446795	0.368122	0.525467	0.400125	0.317364	0.482885
82	0.429451	0.359596	0.499306	0.431506	0.353208	0.509803	0.3836	0.300754	0.466446
83	0.423767	0.353352	0.494183	0.416377	0.338537	0.494217	0.367748	0.284821	0.450674
84	0.417455	0.346516	0.488393	0.401492	0.324164	0.478821	0.352662	0.26967	0.435653
85	0.410591	0.339187	0.481994	0.386897	0.310115	0.463678	0.338302	0.25527	0.421334
86	0.403178	0.331392	0.474965	0.372709	0.296499	0.44892	0.324667	0.241635	0.407698
87	0.395313	0.323248	0.467378	0.358943	0.283317	0.43457	0.311816	0.228826	0.394805
88	0.387066	0.314833	0.459299	0.345674	0.270612	0.420735	0.299721	0.216814	0.382629
89	0.378448	0.306186	0.450711	0.33292	0.258403	0.407437	0.28837	0.205608	0.371131
90	0.369572	0.297412	0.441732	0.320694	0.246694	0.394693	0.277751	0.19519	0.360313
91	0.360449	0.288539	0.432359	0.309082	0.235569	0.382595	0.267869	0.18557	0.350167
92	0.35114	0.279625	0.422656	0.298075	0.225016	0.371135	0.258678	0.176701	0.340655
93	0.341696	0.270717	0.412676	0.28765	0.215015	0.360286	0.250151	0.168543	0.331758
94	0.332173	0.261866	0.402481	0.277829	0.20557	0.350087	0.242211	0.161021	0.323401
95	0.322631	0.253118	0.392144	0.268592	0.196674	0.34051	0.234881	0.154152	0.315609
96	0.313094	0.244486	0.381702	0.259921	0.188318	0.331524	0.228065	0.147834	0.308297
97	0.303598	0.235991	0.371206	0.251797	0.180482	0.323111	0.221791	0.142093	0.301489
98	0.294223	0.227698	0.360748	0.244206	0.173148	0.315264	0.215958	0.136821	0.295094
99	0.284945	0.219564	0.350326	0.237123	0.166297	0.307949	0.210553	0.132005	0.2891
100	0.275895	0.211701	0.340088	0.230499	0.15989	0.301108	0.205571	0.127632	0.28351
101	0.267003	0.204025	0.32998	0.224294	0.153876	0.294712	0.200907	0.123599	0.278214
102	0.258381	0.196621	0.320141	0.218518	0.148284	0.288752	0.196587	0.119925	0.273248
103	0.250009	0.189462	0.310556	0.213118	0.143058	0.283178	0.192557	0.116552	0.268561
104	0.24193	0.182575	0.301284	0.208045	0.138161	0.277929	0.188775	0.113449	0.264102
105	0.234173	0.175978	0.292369	0.203256	0.133541	0.272972	0.18525	0.110617	0.259882
106	0.226715	0.16963	0.2838	0.198743	0.12921	0.268277	0.181941	0.108001	0.255881
107	0.219623	0.163591	0.275654	0.194488	0.125154	0.263823	0.178791	0.105565	0.252017
108	0.212849	0.157814	0.267883	0.190438	0.121317	0.259559	0.175828	0.103329	0.248327
109	0.206445	0.152329	0.260562	0.186577	0.117693	0.255461	0.173032	0.101268	0.244796
110	0.200387	0.147114	0.25366	0.182903	0.114279	0.251527	0.170364	0.0993458	0.241383
111	0.194675	0.142175	0.247175	0.179404	0.111081	0.247726	0.167791	0.0975274	0.238054
112	0.189307	0.13751	0.241105	0.176059	0.108062	0.244057	0.165368	0.0958568	0.234879
113	0.184267	0.133109	0.235424	0.172834	0.105214	0.240454	0.163013	0.0942647	0.231762
114	0.179547	0.128957	0.230138	0.169753	0.10255	0.236955	0.160763	0.0927709	0.228756
115	0.175098	0.125012	0.225185	0.16678	0.100029	0.23353	0.15861	0.0913783	0.225841
116	0.17094	0.121304	0.220575	0.163918	0.0976666	0.230169	0.156551	0.0900735	0.223028
117	0.167054	0.117814	0.216294	0.161149	0.0954358	0.226862	0.154554	0.0888297	0.220278
118	0.163423	0.114537	0.212309	0.158496	0.0933714	0.22362	0.152642	0.0876612	0.217624
119	0.160032	0.111464	0.2086	0.155954	0.0914457	0.220463	0.150799	0.0865542	0.215044
120	0.156834	0.108562	0.205107	0.15352	0.0896635	0.217376	0.149019	0.0854932	0.212546
121	0.153852	0.10584	0.201864	0.151166	0.0879867	0.214346	0.147326	0.0845029	0.210149
122	0.151041	0.103276	0.198807	0.148928	0.0864471	0.211409	0.145699	0.0835628	0.207836
123	0.148384	0.100853	0.195916	0.146795	0.0850323	0.208557	0.144142	0.0826694	0.205615
124	0.145917	0.0986134	0.193221	0.144736	0.083704	0.205769	0.142652	0.081827	0.203477
125	0.143573	0.0964857	0.19066	0.142781	0.0824844	0.203078	0.141213	0.0810248	0.2014
126	0.141367	0.0945015	0.188232	0.140891	0.0813293	0.200453	0.139829	0.080257	0.199401
127	0.139278	0.0926415	0.185914	0.139085	0.0802621	0.197908	0.138464	0.0795009	0.197427
128	0.137317	0.0909141	0.183719	0.137376	0.0792688	0.195483	0.137151	0.0787772	0.195525
129	0.135468	0.0893115	0.181624	0.135729	0.0783254	0.193133	0.135871	0.0780774	0.193665
130	0.133707	0.0878052	0.179609	0.134161	0.0774387	0.190883	0.134631	0.0773995	0.191863
131	0.132033	0.0863992	0.177667	0.132653	0.0765935	0.188713	0.133398	0.0767232	0.190073
132	0.130462	0.0851083	0.175815	0.1312	0.0757785	0.186622	0.132194	0.0760703	0.188318
133	0.128951	0.0838976	0.174004	0.129809	0.0749901	0.184628	0.131006	0.0754277	0.186584
134	0.127509	0.0827666	0.172251	0.12847	0.0742337	0.182707	0.129817	0.0747835	0.18485
135	0.126142	0.0817168	0.170567	0.127166	0.0734847	0.180848	0.128627	0.0741321	0.183121
136	0.124856	0.0807625	0.16895	0.125901	0.0727513	0.179051	0.127425	0.0734791	0.181372
137	0.123609	0.07986	0.167358	0.124669	0.0720214	0.177316	0.126207	0.0728113	0.179602
138	0.122426	0.0790232	0.165828	0.123487	0.0713186	0.175655	0.124988	0.0721427	0.177834
139	0.121283	0.0782354	0.164331	0.122328	0.0706181	0.174038	0.12374	0.0714474	0.176034
140	0.120182	0.0774902	0.162874	0.121192	0.0699234	0.172461	0.122476	0.0707343	0.174217
141	0.119116	0.076778	0.161455	0.120062	0.0692206	0.170904	0.121178	0.0699936	0.172362
142	0.118088	0.0761017	0.160074	0.118945	0.0685157	0.169375	0.119854	0.0692272	0.17048
143	0.117093	0.0754586	0.158728	0.117838	0.0678096	0.167867	0.118495	0.0684287	0.16856
144	0.116112	0.0748259	0.157398	0.116736	0.0671005	0.166372	0.117121	0.0676112	0.166631
145	0.115172	0.0742338	0.15611	0.115619	0.0663683	0.164869	0.115723	0.0667656	0.16468
146	0.114235	0.0736395	0.15483	0.114513	0.0656445	0.163382	0.114282	0.0658788	0.162685
147	0.113316	0.073057	0.153574	0.113387	0.0648976	0.161877	0.112822	0.0649645	0.160679
148	0.112407	0.0724802	0.152334	0.112257	0.0641456	0.160369	0.111346	0.0640196	0.158672
149	0.111491	0.0718936	0.151089	0.111128	0.0633914	0.158864	0.10985	0.063045	0.156655
150	0.110579	0.0713118	0.149847	0.109962	0.0626102	0.157313	0.108343	0.0620503	0.154636
