# Supplementary material for: Instantaneous movement-unrelated midbrain activity modifies ongoing eye movements
Source: eLife. 2021 May 6;10:e64150. doi: 10.7554/eLife.64150 (PMC8143798; doi:10.7554/eLife.64150)
Supplement: Figure 3—figure supplement 2—source data 1. [file elife-64150-fig3-figsupp2-data1.xlsx]

## Sheet: A - Sacc. amp. (deg) - Near 
time	SFhigh_mean	CI_sfhigh_UP	CI_sfhigh_Down	SFmiddle_mean	CI_sfmiddle_UP	CI_sfmiddle_Down	SFlow_mean	CI_sflow_UP	CI_sflow_Down
-95	0.180813	0.125332	0.236294	0.190752	0.145952	0.235551	0.161466	0.134171	0.188761
-85	0.172446	0.117705	0.227187	0.180629	0.136522	0.224736	0.146035	0.116814	0.175256
-75	0.148475	0.108798	0.188153	0.156485	0.123983	0.188988	0.149898	0.117389	0.182407
-65	0.147649	0.111927	0.18337	0.156815	0.127345	0.186286	0.135581	0.109066	0.162096
-55	0.12423	0.0968419	0.151619	0.156695	0.125669	0.187721	0.131341	0.10535	0.157331
-45	0.129967	0.100067	0.159867	0.146276	0.122339	0.170213	0.125325	0.0994771	0.151172
-35	0.129717	0.102633	0.156801	0.145535	0.121699	0.169371	0.121493	0.0978968	0.14509
-25	0.132622	0.105266	0.159978	0.139962	0.114498	0.165427	0.113192	0.0932586	0.133125
-15	0.125867	0.101754	0.149981	0.117026	0.0968991	0.137153	0.110585	0.088682	0.132489
-5	0.127543	0.103201	0.151885	0.114234	0.098443	0.130026	0.115583	0.0944904	0.136676
5	0.125838	0.104826	0.146849	0.111319	0.097385	0.125253	0.119716	0.099081	0.140352
15	0.118543	0.0989703	0.138117	0.108477	0.094524	0.12243	0.120606	0.0984518	0.142761
25	0.117104	0.0951972	0.139011	0.104222	0.0900543	0.118389	0.132276	0.105965	0.158586
35	0.118803	0.0975331	0.140073	0.147861	0.106865	0.188856	0.158238	0.123937	0.19254
45	0.117569	0.0932882	0.14185	0.221287	0.15437	0.288204	0.182459	0.133783	0.231134
55	0.112833	0.0913374	0.134328	0.330217	0.250361	0.410074	0.232069	0.167804	0.296335
65	0.132464	0.102299	0.162629	0.372873	0.31033	0.435416	0.278112	0.205831	0.350392
75	0.151762	0.113282	0.190242	0.392376	0.331958	0.452793	0.290551	0.212731	0.368372
85	0.158128	0.118042	0.198215	0.384209	0.320125	0.448293	0.336686	0.223062	0.450309
95	0.179287	0.133876	0.224697	0.375803	0.306578	0.445027	0.294852	0.183109	0.406595
105	0.213823	0.15343	0.274216	0.273883	0.207573	0.340194	0.227766	0.121741	0.33379
115	0.215377	0.141488	0.289267	0.12698	0.0916409	0.162319	0.117758	0.0653107	0.170206
125	0.167844	0.114675	0.221013	0.0950908	0.0806299	0.109552	0.0993218	0.0836107	0.115033
135	0.157304	0.107564	0.207045	0.0894945	0.0762096	0.102779	0.121296	0.0733717	0.169221
145	0.128698	0.08809	0.169306	0.0903367	0.0782328	0.102441	0.127808	0.0735135	0.182102

## Sheet: B - Sacc. amp. (deg) - Far
time	SFhigh_mean	CI_sfhigh_UP	CI_sfhigh_Down	SFmiddle_mean	CI_sfmiddle_UP	CI_sfmiddle_Down	SFlow_mean	CI_sflow_UP	CI_sflow_Down
-95	0.145745	0.107354	0.184136	0.167179	0.126226	0.208133	0.192651	0.138107	0.247195
-85	0.148256	0.111211	0.185302	0.177079	0.129622	0.224537	0.186446	0.123977	0.248915
-75	0.145536	0.113258	0.177815	0.141482	0.111216	0.171748	0.183727	0.113379	0.254076
-65	0.148007	0.117521	0.178494	0.132986	0.0958802	0.170092	0.137407	0.0998449	0.174969
-55	0.14578	0.111209	0.180352	0.142629	0.100503	0.184756	0.143462	0.105316	0.181609
-45	0.160598	0.110802	0.210394	0.141908	0.101127	0.182689	0.116953	0.0808708	0.153035
-35	0.145328	0.0964469	0.194209	0.136204	0.0998714	0.172536	0.124521	0.0981113	0.15093
-25	0.139671	0.0813498	0.197992	0.131272	0.0873637	0.175181	0.133293	0.100954	0.165631
-15	0.14033	0.0763545	0.204306	0.122255	0.0846027	0.159907	0.143892	0.108318	0.179466
-5	0.131754	0.0742386	0.189269	0.117424	0.082106	0.152742	0.134159	0.0979265	0.170392
5	0.0957146	0.0690303	0.122399	0.11747	0.0857779	0.149163	0.162023	0.123964	0.200081
15	0.110575	0.0810649	0.140086	0.144832	0.0718567	0.217808	0.169806	0.114715	0.224897
25	0.118427	0.0868468	0.150007	0.144294	0.0748695	0.213719	0.161811	0.123429	0.200193
35	0.1145	0.0882879	0.140713	0.147703	0.0772498	0.218156	0.165144	0.0973537	0.232934
45	0.126421	0.0942476	0.158594	0.153411	0.0770398	0.229783	0.17712	0.088512	0.265727
55	0.127708	0.0993751	0.156042	0.153133	0.0491503	0.257116	0.166571	0.0672938	0.265849
65	0.124311	0.0986366	0.149986	0.117118	0.0699911	0.164245	0.167352	0.0682878	0.266417
75	0.119375	0.0955407	0.143209	0.130906	0.0751488	0.186662	0.166364	0.0201821	0.312546
85	0.115017	0.0873462	0.142687	0.115369	0.0634915	0.167246	0.149377	0.114676	0.184079
95	0.102933	0.0810439	0.124822	0.0984246	0.0625421	0.134307	0.125048	0.0981199	0.151975
105	0.099343	0.0748034	0.123883	0.102066	0.0793174	0.124814	0.11928	0.0970279	0.141531
115	0.105607	0.0829262	0.128288	0.108821	0.0896333	0.128009	0.123341	0.10303	0.143651
125	0.108614	0.0844643	0.132763	0.0991206	0.0841321	0.114109	0.118715	0.100899	0.136532
135	0.103493	0.0847339	0.122251	0.0953449	0.0816838	0.109006	0.112995	0.0947367	0.131253
145	0.1033	0.0863119	0.120289	0.0923262	0.0783756	0.106277	0.121514	0.102725	0.140303

## Sheet: C - Norm. firing rate - Near
time	SFhigh_mean	CI_sfhigh_UP	CI_sfhigh_Down	SFmiddle_mean	CI_sfmiddle_UP	CI_sfmiddle_Down	SFlow_mean	CI_sflow_UP	CI_sflow_Down
-99	0.0608009	0.0837739	0.037828	0.0570199	0.0771004	0.0369394	0.0672808	0.091408	0.0431536
-98	0.0615478	0.0850342	0.0380614	0.0577747	0.0781089	0.0374405	0.0672863	0.0912985	0.0432741
-97	0.0622397	0.0862076	0.0382718	0.0584565	0.0790166	0.0378965	0.0671495	0.0910109	0.0432882
-96	0.062897	0.0873138	0.0384802	0.0590833	0.0798647	0.038302	0.0668801	0.0905294	0.0432307
-95	0.06349	0.0883316	0.0386485	0.0596403	0.0806341	0.0386464	0.0665156	0.0899303	0.0431009
-94	0.0639894	0.0891795	0.0387994	0.0600573	0.081214	0.0389007	0.0660544	0.0892216	0.0428871
-93	0.0643958	0.0898882	0.0389035	0.0604212	0.08174	0.0391024	0.0655277	0.0884392	0.0426163
-92	0.0646826	0.0904041	0.038961	0.0606679	0.0821208	0.039215	0.0649832	0.0876425	0.0423239
-91	0.0648578	0.0907393	0.0389762	0.0608906	0.0824652	0.0393161	0.0643341	0.0867239	0.0419442
-90	0.0649325	0.0909356	0.0389294	0.0610604	0.0827478	0.039373	0.0636592	0.0858013	0.0415171
-89	0.0648656	0.0908978	0.0388334	0.0611329	0.0829086	0.0393572	0.0630042	0.0849252	0.0410833
-88	0.0646888	0.0906995	0.0386781	0.0611886	0.083068	0.0393092	0.0623427	0.0840733	0.0406122
-87	0.0643459	0.0902627	0.0384292	0.0611836	0.0831344	0.0392328	0.0617181	0.083278	0.0401582
-86	0.0638952	0.0896537	0.0381367	0.0611912	0.0832344	0.0391481	0.0610864	0.0824954	0.0396775
-85	0.0633259	0.0888697	0.0377822	0.061122	0.0832386	0.0390055	0.0605094	0.0818094	0.0392093
-84	0.0626294	0.0879007	0.037358	0.061043	0.0832409	0.0388451	0.0599718	0.0811807	0.0387628
-83	0.0619134	0.0868918	0.0369351	0.0609365	0.0832236	0.0386495	0.0594768	0.0806241	0.0383296
-82	0.0611299	0.0857881	0.0364718	0.0607686	0.0831191	0.038418	0.0590138	0.0800971	0.0379305
-81	0.0602922	0.0845936	0.0359908	0.0606095	0.0830444	0.0381746	0.0585679	0.0795751	0.0375607
-80	0.0594427	0.0833739	0.0355115	0.0604078	0.0829176	0.0378979	0.0581703	0.0791125	0.037228
-79	0.0585782	0.082117	0.0350393	0.0601999	0.0827943	0.0376054	0.0577571	0.0786154	0.0368988
-78	0.0576873	0.0808159	0.0345588	0.0598801	0.0825213	0.0372389	0.0573791	0.0781531	0.0366051
-77	0.0568226	0.0795408	0.0341045	0.0595707	0.0822703	0.0368711	0.0570372	0.0777235	0.0363508
-76	0.0559883	0.0783036	0.0336731	0.0592382	0.0820009	0.0364756	0.0566147	0.0771739	0.0360555
-75	0.0552485	0.0772004	0.0332965	0.0589184	0.0817366	0.0361002	0.0562539	0.076675	0.0358329
-74	0.0545715	0.0761761	0.0329668	0.0584945	0.0813296	0.0356593	0.0558996	0.0761706	0.0356285
-73	0.0539178	0.0751699	0.0326657	0.0580456	0.0809018	0.0351893	0.0555442	0.0756644	0.035424
-72	0.0533678	0.0743234	0.0324122	0.0575395	0.080381	0.0346979	0.0551497	0.0750919	0.0352076
-71	0.0527939	0.0734341	0.0321538	0.0570634	0.079923	0.0342039	0.0547604	0.0745203	0.0350004
-70	0.0523465	0.0727265	0.0319665	0.0565451	0.0793818	0.0337083	0.0544106	0.0740089	0.0348122
-69	0.0519306	0.0720644	0.0317968	0.0560124	0.0788175	0.0332073	0.0540582	0.0735062	0.0346102
-68	0.051517	0.071398	0.0316359	0.0554143	0.0781546	0.0326739	0.0537117	0.0730019	0.0344216
-67	0.0511849	0.0708578	0.031512	0.0549062	0.0776164	0.032196	0.0533051	0.0724221	0.0341881
-66	0.0508504	0.0703303	0.0313705	0.0543841	0.0770715	0.0316968	0.0529513	0.0719051	0.0339975
-65	0.0505785	0.0698974	0.0312597	0.0539354	0.0765911	0.0312797	0.0526286	0.071456	0.0338012
-64	0.0503342	0.0695054	0.031163	0.0534834	0.0761105	0.0308564	0.0523214	0.0710512	0.0335916
-63	0.0500847	0.0691081	0.0310612	0.0531433	0.0757927	0.0304939	0.0520555	0.0706936	0.0334174
-62	0.0498187	0.0686863	0.0309511	0.0528043	0.0754991	0.0301096	0.0518039	0.0703485	0.0332594
-61	0.0496065	0.0683494	0.0308636	0.0525744	0.0753287	0.0298202	0.0515859	0.0700743	0.0330975
-60	0.0493256	0.0679288	0.0307223	0.0523681	0.0751808	0.0295554	0.0513475	0.0697671	0.0329278
-59	0.0491519	0.0676651	0.0306388	0.0522347	0.0751323	0.029337	0.0511758	0.0695824	0.0327692
-58	0.0489783	0.0674119	0.0305447	0.0521089	0.0750873	0.0291306	0.0510045	0.0693877	0.0326214
-57	0.0487984	0.0671227	0.0304742	0.0520393	0.0751296	0.028949	0.0508399	0.0692067	0.0324731
-56	0.0486559	0.0669031	0.0304086	0.0520716	0.0752849	0.0288583	0.0506697	0.0690302	0.0323092
-55	0.0485457	0.0667174	0.030374	0.0520746	0.0753768	0.0287723	0.05052	0.0688791	0.0321609
-54	0.0484214	0.0665232	0.0303196	0.0520851	0.0754667	0.0287035	0.0503928	0.0687631	0.0320225
-53	0.048325	0.0663562	0.0302939	0.052123	0.075557	0.028689	0.0503033	0.0687071	0.0318996
-52	0.0482755	0.0662628	0.0302883	0.0521467	0.0756093	0.028684	0.0502042	0.0686398	0.0317685
-51	0.0482236	0.0661643	0.0302828	0.0521366	0.0755954	0.0286778	0.0500994	0.0685665	0.0316322
-50	0.0482733	0.0662135	0.030333	0.0521319	0.0755272	0.0287366	0.0500004	0.0684962	0.0315045
-49	0.0483115	0.0662488	0.0303741	0.0521226	0.0754241	0.0288212	0.0498709	0.0683665	0.0313752
-48	0.0484136	0.0663843	0.0304428	0.052125	0.0753197	0.0289302	0.0497326	0.0682475	0.0312176
-47	0.0485765	0.0666213	0.0305316	0.0521599	0.0752044	0.0291155	0.0496421	0.0681871	0.0310971
-46	0.0487511	0.0668738	0.0306285	0.0521906	0.0750664	0.0293149	0.0495622	0.0681242	0.0310002
-45	0.0489676	0.0671842	0.030751	0.0521714	0.0748025	0.0295403	0.0494948	0.068104	0.0308855
-44	0.0491968	0.0675236	0.03087	0.0521549	0.0745307	0.0297791	0.04939	0.0680217	0.0307584
-43	0.049449	0.0678988	0.0309992	0.0521206	0.0741976	0.0300437	0.0493086	0.0679737	0.0306435
-42	0.0497314	0.0683096	0.0311531	0.0522197	0.0740326	0.0304069	0.0492882	0.0680031	0.0305734
-41	0.0500315	0.0687588	0.0313042	0.052318	0.0738543	0.0307817	0.0492274	0.0679814	0.0304734
-40	0.0503025	0.0691515	0.0314535	0.052504	0.0737943	0.0312137	0.0492123	0.0680358	0.0303887
-39	0.0506247	0.0696109	0.0316384	0.0527518	0.0738201	0.0316835	0.0492477	0.068169	0.0303263
-38	0.0509509	0.0700858	0.0318159	0.0530553	0.0739372	0.0321735	0.0493371	0.0683779	0.0302963
-37	0.0512309	0.0704946	0.0319672	0.053484	0.0742352	0.0327328	0.0494548	0.0686324	0.0302772
-36	0.0515051	0.0708813	0.0321288	0.0540128	0.0746784	0.0333472	0.049624	0.0689526	0.0302954
-35	0.0517375	0.0712029	0.0322721	0.0545883	0.0752205	0.033956	0.0498684	0.0693806	0.0303563
-34	0.0519767	0.0715446	0.0324088	0.0552134	0.0758552	0.0345717	0.0501415	0.0698421	0.0304408
-33	0.0521828	0.0718307	0.0325349	0.0559275	0.0766468	0.0352082	0.0504675	0.0703921	0.030543
-32	0.0523444	0.0720339	0.0326549	0.0566472	0.0774664	0.0358279	0.0509063	0.0710889	0.0307236
-31	0.0524154	0.0721159	0.032715	0.0574213	0.0783961	0.0364465	0.051392	0.0718401	0.0309439
-30	0.0524682	0.0721685	0.032768	0.0582194	0.0793923	0.0370466	0.0519382	0.0726788	0.0311976
-29	0.0524746	0.0721485	0.0328007	0.058986	0.0803632	0.0376089	0.0524954	0.0735001	0.0314907
-28	0.0524511	0.07207	0.0328323	0.059697	0.0812908	0.0381032	0.0530715	0.0743316	0.0318114
-27	0.0524217	0.071998	0.0328455	0.0603669	0.0821823	0.0385515	0.053719	0.0752408	0.0321972
-26	0.0523384	0.0718539	0.0328228	0.0609418	0.0829517	0.038932	0.0543042	0.0760328	0.0325756
-25	0.0522273	0.0716744	0.0327802	0.0614133	0.083592	0.0392345	0.0548511	0.0767407	0.0329614
-24	0.0521773	0.0715853	0.0327692	0.0617465	0.0840452	0.0394479	0.0553861	0.077397	0.0333752
-23	0.0520666	0.0714013	0.0327319	0.0619826	0.084385	0.0395802	0.0558699	0.077968	0.0337718
-22	0.0519679	0.0712414	0.0326944	0.0620315	0.0844538	0.0396092	0.0563041	0.078444	0.0341642
-21	0.0518628	0.0710764	0.0326492	0.0618755	0.084228	0.039523	0.056673	0.0788099	0.034536
-20	0.0518418	0.071037	0.0326466	0.0615812	0.0838264	0.039336	0.0569409	0.0789986	0.0348832
-19	0.0517931	0.0709564	0.0326298	0.0611655	0.0832539	0.0390772	0.0571281	0.0790533	0.0352028
-18	0.0517433	0.0708928	0.0325937	0.0606162	0.0824891	0.0387433	0.0572305	0.078974	0.035487
-17	0.0516847	0.0708173	0.0325521	0.0598605	0.0814196	0.0383013	0.0573032	0.0788456	0.0357608
-16	0.0516632	0.0707798	0.0325466	0.0589829	0.0801635	0.0378024	0.057251	0.078543	0.0359591
-15	0.0516877	0.0708043	0.0325711	0.0580551	0.0788405	0.0372696	0.0571232	0.0781275	0.036119
-14	0.0517454	0.0708903	0.0326005	0.0570077	0.0773368	0.0366787	0.0569518	0.0776499	0.0362537
-13	0.0517346	0.0708691	0.0326	0.0559574	0.0758429	0.0360719	0.0567076	0.077087	0.0363281
-12	0.0518085	0.0709695	0.0326475	0.0548221	0.0742112	0.0354331	0.0564195	0.0764923	0.0363468
-11	0.0518234	0.0709861	0.0326608	0.0537819	0.0727225	0.0348414	0.0560817	0.0758247	0.0363387
-10	0.0518727	0.0710382	0.0327072	0.0527433	0.0712453	0.0342412	0.0557073	0.0751548	0.0362597
-9	0.0519248	0.0711112	0.0327385	0.0517683	0.0698673	0.0336693	0.0553559	0.0745415	0.0361702
-8	0.0519204	0.0710922	0.0327485	0.0508631	0.068595	0.0331312	0.0549506	0.073889	0.0360123
-7	0.0518929	0.0710397	0.0327461	0.0500087	0.0674075	0.03261	0.0544964	0.0732127	0.0357802
-6	0.0518444	0.0709576	0.0327311	0.0492762	0.066422	0.0321304	0.0540289	0.0725556	0.0355023
-5	0.0517499	0.0708101	0.0326897	0.0486706	0.0656332	0.031708	0.0535772	0.0719544	0.0352001
-4	0.0516387	0.0706633	0.0326141	0.0481893	0.0650442	0.0313343	0.0531309	0.0713873	0.0348746
-3	0.0514991	0.0704714	0.0325268	0.0477843	0.0645766	0.0309921	0.0526699	0.070849	0.0344908
-2	0.051333	0.0702493	0.0324167	0.0475468	0.0643725	0.0307211	0.0521845	0.0702978	0.0340711
-1	0.0511862	0.070061	0.0323113	0.047388	0.0643155	0.0304606	0.0517192	0.0698054	0.0336331
0	0.050983	0.0698017	0.0321643	0.0473158	0.0643753	0.0302563	0.0512446	0.0693213	0.0331679
1	0.0507343	0.069488	0.0319806	0.0473641	0.0646242	0.030104	0.0507685	0.0688464	0.0326906
2	0.0505092	0.0692346	0.0317838	0.0474657	0.0649575	0.029974	0.0503748	0.0684907	0.0322589
3	0.0502666	0.0689516	0.0315817	0.0475695	0.0653096	0.0298293	0.049911	0.0680334	0.0317887
4	0.0499817	0.0686212	0.0313421	0.0477374	0.0657429	0.029732	0.0494852	0.0676237	0.0313468
5	0.0497258	0.0683383	0.0311133	0.0479968	0.0662843	0.0297092	0.0490519	0.0671896	0.0309142
6	0.0494486	0.0680381	0.0308591	0.0482357	0.0667966	0.0296748	0.0487105	0.066873	0.030548
7	0.0491319	0.0676794	0.0305843	0.0484659	0.0672774	0.0296544	0.0484174	0.0666034	0.0302314
8	0.0487915	0.0673068	0.0302763	0.0486667	0.0676864	0.029647	0.0482566	0.0664813	0.0300319
9	0.0484387	0.0669144	0.029963	0.0488855	0.0681079	0.0296631	0.0481835	0.0664691	0.029898
10	0.0481111	0.0665493	0.0296728	0.0491145	0.0685076	0.0297213	0.0482633	0.0666004	0.0299261
11	0.0477646	0.0661649	0.0293644	0.0493632	0.0688878	0.0298386	0.048515	0.0669245	0.0301056
12	0.0473852	0.0657295	0.0290408	0.0497507	0.0694099	0.0300914	0.0489838	0.0674777	0.0304899
13	0.0470271	0.0653428	0.0287114	0.0502183	0.0699847	0.0304519	0.0497704	0.0683668	0.0311741
14	0.0466989	0.0649953	0.0284024	0.0508881	0.0707674	0.0310087	0.0508461	0.0695403	0.0321519
15	0.0464048	0.0646779	0.0281317	0.0518116	0.0717662	0.0318569	0.0523762	0.071208	0.0335444
16	0.0460887	0.0643295	0.0278479	0.0530372	0.0730432	0.0330312	0.0543789	0.0734098	0.0353481
17	0.0458089	0.064027	0.0275908	0.054805	0.0748791	0.0347309	0.0568589	0.0761118	0.037606
18	0.0456194	0.0638088	0.0274299	0.0568161	0.0769518	0.0366805	0.0601291	0.0796349	0.0406233
19	0.0455111	0.0636708	0.0273514	0.0596508	0.0798484	0.0394533	0.0640261	0.0838102	0.044242
20	0.0456063	0.0637363	0.0274764	0.0628634	0.0831169	0.0426098	0.0687712	0.0888747	0.0486677
21	0.0458284	0.06397	0.0276869	0.0669002	0.0872307	0.0465697	0.0745117	0.0950063	0.0540171
22	0.0463916	0.0645303	0.0282528	0.0715723	0.0919797	0.0511649	0.0813547	0.102302	0.0604076
23	0.0470649	0.0652172	0.0289126	0.0771718	0.0976942	0.0566495	0.0892082	0.110661	0.0677555
24	0.0480453	0.0662322	0.0298585	0.0839687	0.104686	0.0632516	0.0984549	0.120465	0.0764449
25	0.0491789	0.0673916	0.0309662	0.0921943	0.113178	0.0712105	0.109268	0.131921	0.0866154
26	0.0506438	0.0689008	0.0323869	0.101646	0.122979	0.0803127	0.12163	0.14501	0.0982494
27	0.0525513	0.07092	0.0341826	0.11272	0.134521	0.0909184	0.135756	0.15994	0.111571
28	0.0549152	0.0734206	0.0364099	0.125534	0.147932	0.103137	0.151754	0.176837	0.126671
29	0.0577001	0.0763845	0.0390158	0.140262	0.163437	0.117087	0.169798	0.195865	0.143731
30	0.0610913	0.0800373	0.0421454	0.156969	0.181079	0.132859	0.189861	0.217009	0.162712
31	0.065032	0.0843193	0.0457446	0.175668	0.200887	0.15045	0.211966	0.240284	0.183648
32	0.0695967	0.0893068	0.0498867	0.196306	0.222815	0.169797	0.236196	0.265742	0.20665
33	0.0748117	0.0950656	0.0545578	0.219311	0.247291	0.191331	0.262572	0.29342	0.231724
34	0.0808447	0.101769	0.0599203	0.244299	0.27392	0.214677	0.290949	0.323138	0.258761
35	0.0874805	0.109223	0.0657377	0.271545	0.302953	0.240137	0.321154	0.354674	0.287634
36	0.0949113	0.117666	0.0721569	0.300716	0.333955	0.267478	0.35295	0.387787	0.318113
37	0.103081	0.127007	0.0791554	0.331441	0.366592	0.29629	0.386341	0.422443	0.350239
38	0.111885	0.13714	0.0866309	0.363926	0.400983	0.32687	0.420946	0.458216	0.383676
39	0.121328	0.14805	0.0946068	0.397669	0.436559	0.35878	0.456458	0.494789	0.418128
40	0.131547	0.15986	0.103234	0.432423	0.473042	0.391804	0.492452	0.531703	0.453202
41	0.142263	0.172283	0.112244	0.467709	0.509944	0.425475	0.528632	0.568643	0.488622
42	0.153455	0.185236	0.121675	0.503447	0.547117	0.459777	0.564548	0.605129	0.523967
43	0.164876	0.198447	0.131306	0.539201	0.584096	0.494306	0.599836	0.640816	0.558855
44	0.176546	0.211894	0.141197	0.574399	0.620291	0.528507	0.634095	0.675275	0.592915
45	0.188501	0.225569	0.151432	0.608809	0.655452	0.562165	0.666825	0.708019	0.625631
46	0.200508	0.239204	0.161811	0.642162	0.689315	0.595009	0.6977	0.738722	0.656678
47	0.212373	0.252584	0.172163	0.67381	0.721277	0.626343	0.726408	0.767081	0.685735
48	0.224123	0.265708	0.182537	0.703506	0.751132	0.65588	0.75245	0.792671	0.712229
49	0.235607	0.27838	0.192834	0.731189	0.778858	0.683519	0.775683	0.81534	0.736027
50	0.246947	0.290714	0.203179	0.756444	0.804081	0.708808	0.795826	0.834844	0.756808
51	0.258021	0.302592	0.21345	0.778966	0.826594	0.731338	0.81267	0.851022	0.774318
52	0.268757	0.313941	0.223572	0.798792	0.846496	0.751088	0.826208	0.863871	0.788545
53	0.279106	0.324719	0.233493	0.815705	0.863625	0.767785	0.836336	0.873302	0.79937
54	0.289266	0.335154	0.243378	0.829582	0.877897	0.781267	0.842999	0.879316	0.806681
55	0.299123	0.34513	0.253115	0.84021	0.889135	0.791284	0.846224	0.881957	0.810492
56	0.308821	0.354871	0.262771	0.847837	0.897602	0.798072	0.84617	0.881393	0.810948
57	0.318188	0.364205	0.272172	0.852408	0.903228	0.801588	0.842989	0.877781	0.808197
58	0.327493	0.373455	0.281531	0.853952	0.906012	0.801892	0.837015	0.871416	0.802613
59	0.336648	0.382559	0.290737	0.852583	0.906031	0.799136	0.828335	0.862463	0.794208
60	0.34576	0.391684	0.299836	0.848366	0.903273	0.793459	0.817145	0.851086	0.783205
61	0.354826	0.400838	0.308814	0.841576	0.898027	0.785125	0.803691	0.837561	0.769821
62	0.363992	0.41023	0.317754	0.832268	0.890217	0.774319	0.788443	0.822339	0.754546
63	0.373044	0.419601	0.326488	0.820578	0.879965	0.761192	0.771644	0.80569	0.737597
64	0.382104	0.429116	0.335091	0.806775	0.867519	0.746032	0.753563	0.787859	0.719268
65	0.391104	0.438701	0.343508	0.791037	0.853003	0.729072	0.73433	0.769013	0.699647
66	0.400027	0.448304	0.351751	0.773687	0.836714	0.710659	0.714478	0.749681	0.679276
67	0.408836	0.457867	0.359805	0.755062	0.81903	0.691094	0.694074	0.729939	0.658209
68	0.417445	0.467325	0.367566	0.735136	0.799877	0.670395	0.673555	0.71022	0.636889
69	0.425688	0.476477	0.374899	0.714327	0.779695	0.64896	0.652938	0.690517	0.615359
70	0.433493	0.485208	0.381778	0.692871	0.758719	0.627022	0.632614	0.671197	0.594031
71	0.440927	0.493588	0.388266	0.671013	0.737227	0.6048	0.61268	0.652367	0.572994
72	0.447819	0.501426	0.394211	0.649128	0.715602	0.582653	0.593204	0.634082	0.552326
73	0.453994	0.508526	0.399463	0.627293	0.693902	0.560683	0.57461	0.616741	0.53248
74	0.459519	0.514962	0.404076	0.605708	0.67239	0.539025	0.556577	0.599944	0.513211
75	0.464332	0.520658	0.408006	0.584618	0.651295	0.517941	0.539427	0.584012	0.494843
76	0.46834	0.525514	0.411165	0.564064	0.63065	0.497477	0.523436	0.569257	0.477615
77	0.471575	0.529569	0.413581	0.544672	0.611136	0.478209	0.508263	0.555271	0.461255
78	0.473871	0.532611	0.415132	0.525983	0.592218	0.459747	0.494222	0.542368	0.446076
79	0.475248	0.534671	0.415825	0.508581	0.574623	0.442538	0.481421	0.530635	0.432206
80	0.475863	0.535904	0.415823	0.492135	0.557949	0.426322	0.469535	0.519713	0.419358
81	0.475645	0.536272	0.415017	0.477044	0.542602	0.411486	0.458744	0.509768	0.407721
82	0.474801	0.535923	0.41368	0.462952	0.528202	0.397702	0.449195	0.500995	0.397395
83	0.473094	0.534589	0.411599	0.449927	0.514863	0.38499	0.440567	0.493049	0.388086
84	0.47083	0.53265	0.409009	0.437768	0.50239	0.373145	0.432854	0.485924	0.379784
85	0.467895	0.529957	0.405832	0.426626	0.49087	0.362383	0.426131	0.479706	0.372555
86	0.464263	0.526493	0.402033	0.41632	0.480196	0.352444	0.4204	0.474434	0.366366
87	0.460215	0.522556	0.397873	0.406703	0.47017	0.343236	0.415396	0.469802	0.360991
88	0.455822	0.518219	0.393425	0.397775	0.460827	0.334724	0.411159	0.465898	0.35642
89	0.450879	0.513267	0.38849	0.389476	0.45211	0.326841	0.407641	0.462668	0.352613
90	0.445702	0.508047	0.383358	0.381781	0.443969	0.319593	0.404852	0.460171	0.349533
91	0.440332	0.502611	0.378053	0.374799	0.436582	0.313017	0.40252	0.458079	0.346961
92	0.434724	0.496899	0.37255	0.367848	0.429203	0.306493	0.400726	0.456526	0.344927
93	0.428789	0.490811	0.366767	0.361449	0.422378	0.30052	0.399199	0.455201	0.343198
94	0.422875	0.484707	0.361043	0.355125	0.415583	0.294666	0.398123	0.454361	0.341886
95	0.41697	0.478599	0.355341	0.349138	0.409163	0.289114	0.397271	0.453712	0.340831
96	0.411087	0.472468	0.349705	0.343611	0.403231	0.283991	0.396455	0.453108	0.339802
97	0.405181	0.466263	0.344099	0.338041	0.397232	0.278849	0.395669	0.452556	0.338782
98	0.39932	0.460058	0.338581	0.332704	0.3915	0.273908	0.395087	0.452223	0.337952
99	0.393483	0.453812	0.333154	0.327549	0.385989	0.26911	0.394291	0.451629	0.336953
100	0.387784	0.447648	0.32792	0.322587	0.380685	0.264488	0.393379	0.450942	0.335815
101	0.382156	0.441485	0.322828	0.317582	0.375378	0.259786	0.392216	0.449996	0.334435
102	0.376742	0.435485	0.317999	0.31259	0.370113	0.255067	0.390987	0.449017	0.332958
103	0.371342	0.429409	0.313275	0.307732	0.365002	0.250463	0.38931	0.447561	0.33106
104	0.365919	0.42326	0.308577	0.302932	0.360046	0.245818	0.387466	0.445964	0.328968
105	0.360664	0.417208	0.30412	0.298015	0.354996	0.241034	0.385311	0.444105	0.326516
106	0.355456	0.411129	0.299783	0.293445	0.350473	0.236416	0.382725	0.441823	0.323627
107	0.350295	0.405078	0.295512	0.289002	0.346175	0.23183	0.380045	0.439536	0.320555
108	0.345058	0.398873	0.291243	0.284437	0.341859	0.227015	0.377045	0.437014	0.317076
109	0.339724	0.392543	0.286905	0.27991	0.337704	0.222116	0.373722	0.434257	0.313187
110	0.334331	0.386126	0.282536	0.275477	0.333767	0.217186	0.37015	0.431341	0.308958
111	0.328906	0.379667	0.278146	0.271072	0.330008	0.212136	0.366258	0.428192	0.304324
112	0.323425	0.373159	0.273692	0.266673	0.326385	0.20696	0.362152	0.424949	0.299356
113	0.317845	0.366586	0.269103	0.262501	0.323199	0.201802	0.357829	0.421585	0.294073
114	0.312225	0.35998	0.26447	0.258386	0.320165	0.196607	0.35346	0.418335	0.288585
115	0.306479	0.353308	0.25965	0.254257	0.317231	0.191282	0.348908	0.414963	0.282854
116	0.300824	0.346772	0.254877	0.250265	0.314616	0.185915	0.344194	0.411505	0.276883
117	0.295054	0.340192	0.249915	0.246314	0.312075	0.180554	0.339297	0.407911	0.270683
118	0.289306	0.333719	0.244893	0.242435	0.309694	0.175176	0.334355	0.404297	0.264412
119	0.283628	0.327418	0.239838	0.238698	0.307556	0.16984	0.329488	0.400775	0.258202
120	0.277974	0.321248	0.234701	0.234862	0.305223	0.1645	0.324707	0.397405	0.252008
121	0.272268	0.315111	0.229426	0.231145	0.303037	0.159253	0.319859	0.393862	0.245856
122	0.266903	0.309463	0.224342	0.227534	0.300909	0.154159	0.314988	0.390216	0.239761
123	0.26158	0.303946	0.219213	0.22401	0.298843	0.149177	0.310116	0.38649	0.233742
124	0.256563	0.29891	0.214216	0.220607	0.296857	0.144357	0.305429	0.382841	0.228017
125	0.251838	0.294315	0.209362	0.217157	0.294609	0.139705	0.300732	0.379036	0.222429
126	0.24724	0.289939	0.204542	0.213567	0.292083	0.135052	0.296068	0.375085	0.217052
127	0.243072	0.286136	0.200009	0.210197	0.289739	0.130655	0.291471	0.37108	0.211862
128	0.23928	0.282888	0.195672	0.206741	0.287107	0.126375	0.286898	0.366841	0.206955
129	0.235874	0.280137	0.19161	0.203279	0.284308	0.12225	0.282353	0.362489	0.202217
130	0.232804	0.277885	0.187723	0.199861	0.281477	0.118245	0.277759	0.357894	0.197624
131	0.230104	0.27615	0.184059	0.196265	0.278217	0.114313	0.273267	0.35322	0.193314
132	0.227806	0.274935	0.180677	0.192768	0.274909	0.110627	0.268651	0.348191	0.189112
133	0.225926	0.274304	0.177547	0.18932	0.271546	0.107094	0.264349	0.34342	0.185277
134	0.224355	0.274045	0.174664	0.185854	0.268018	0.10369	0.259972	0.338402	0.181541
135	0.223135	0.274296	0.171973	0.182386	0.264299	0.100473	0.255409	0.332961	0.177858
136	0.222162	0.274905	0.169418	0.178839	0.260355	0.0973231	0.250975	0.327527	0.174424
137	0.221682	0.276116	0.167247	0.175325	0.256273	0.0943765	0.246639	0.322175	0.171103
138	0.221328	0.277503	0.165153	0.171853	0.252156	0.0915495	0.242128	0.316457	0.167799
139	0.221196	0.279164	0.163228	0.168419	0.247956	0.0888825	0.23778	0.310852	0.164708
140	0.221213	0.281013	0.161413	0.164975	0.243695	0.0862551	0.233465	0.305222	0.161709
141	0.221361	0.28301	0.159712	0.161632	0.239354	0.0839103	0.229188	0.299568	0.158807
142	0.221871	0.285446	0.158295	0.158424	0.23518	0.0816687	0.225023	0.294002	0.156045
143	0.222291	0.28772	0.156861	0.15513	0.230819	0.0794411	0.221044	0.288653	0.153436
144	0.222735	0.289965	0.155505	0.152006	0.226565	0.0774467	0.217256	0.283508	0.151005
145	0.223287	0.292362	0.154211	0.14892	0.22229	0.0755493	0.213491	0.278324	0.148657
146	0.22355	0.294328	0.152771	0.145965	0.218102	0.0738283	0.210025	0.27355	0.1465
147	0.223804	0.296293	0.151314	0.143018	0.213831	0.0722043	0.206779	0.26904	0.144518
148	0.223929	0.297969	0.14989	0.140083	0.209542	0.0706239	0.203797	0.264831	0.142763
149	0.224026	0.299598	0.148454	0.137342	0.205522	0.0691617	0.201038	0.260899	0.141177

## Sheet: D - Norm. firing rate - Far
time	SFhigh_mean	CI_sfhigh_UP	CI_sfhigh_Down	SFmiddle_mean	CI_sfmiddle_UP	CI_sfmiddle_Down	SFlow_mean	CI_sflow_UP	CI_sflow_Down
-99	0.0152271	0.0217218	0.00873247	0.0108697	0.0155455	0.00619379	0.00878082	0.0126119	0.0049497
-98	0.0151267	0.0215929	0.0086604	0.0110562	0.0158232	0.00628926	0.00874499	0.0126044	0.00488561
-97	0.0150156	0.02145	0.0085812	0.011266	0.0161405	0.00639158	0.00867975	0.0125536	0.00480592
-96	0.014895	0.0212923	0.00849768	0.0114643	0.0164541	0.00647463	0.00858835	0.0124625	0.00471417
-95	0.0147674	0.021117	0.00841771	0.0117202	0.0168638	0.00657671	0.0084307	0.0122657	0.00459566
-94	0.0146365	0.0209337	0.00833938	0.0119657	0.0172682	0.00666325	0.0083219	0.0121489	0.00449491
-93	0.0145132	0.0207577	0.00826863	0.0122079	0.0176831	0.00673279	0.00817995	0.0119743	0.00438561
-92	0.0144108	0.0205947	0.00822693	0.0124592	0.01812	0.00679848	0.00801528	0.0117632	0.00426734
-91	0.014316	0.0204458	0.00818623	0.0127185	0.0185723	0.00686467	0.00783368	0.0115234	0.00414397
-90	0.0142674	0.0203224	0.00821235	0.0129537	0.0189993	0.00690822	0.00765367	0.0112752	0.00403213
-89	0.0141955	0.0201821	0.00820896	0.013162	0.0193855	0.00693851	0.00747012	0.0110186	0.00392164
-88	0.0141426	0.0200584	0.00822689	0.0133607	0.0197651	0.00695623	0.00727805	0.0107476	0.00380854
-87	0.0140893	0.019926	0.00825248	0.0135253	0.0200948	0.00695581	0.00709881	0.0104915	0.00370612
-86	0.0141125	0.019882	0.00834303	0.0136505	0.0203639	0.00693704	0.00693628	0.010254	0.00361852
-85	0.0141449	0.0198418	0.00844786	0.0137709	0.0206291	0.00691267	0.00681145	0.0100783	0.00354464
-84	0.0142039	0.0198379	0.00856994	0.0138275	0.020784	0.00687099	0.00668317	0.00989273	0.0034736
-83	0.0142972	0.0198719	0.00872262	0.01384	0.0208554	0.00682455	0.00658193	0.00974599	0.00341786
-82	0.0144213	0.0199403	0.00890224	0.0138205	0.0208751	0.00676593	0.00650512	0.00963625	0.003374
-81	0.0145344	0.0199956	0.00907325	0.0137762	0.02084	0.00671242	0.00645286	0.00956388	0.00334185
-80	0.0146904	0.0200985	0.00928238	0.0136876	0.0207306	0.00664458	0.00642203	0.00952549	0.00331858
-79	0.0148616	0.0202174	0.00950588	0.0135807	0.0205766	0.00658486	0.00642576	0.00953862	0.00331289
-78	0.0150448	0.0203487	0.0097409	0.0134489	0.0203714	0.00652648	0.00644654	0.00957978	0.00331329
-77	0.0152392	0.020491	0.00998748	0.0132914	0.0201185	0.00646424	0.00649489	0.00966205	0.00332774
-76	0.0154377	0.02064	0.0102354	0.0131457	0.0198734	0.00641802	0.00656922	0.00978191	0.00335654
-75	0.0156337	0.0207834	0.0104841	0.012986	0.019592	0.00638001	0.0066511	0.00991443	0.00338778
-74	0.0158309	0.0209311	0.0107307	0.0128285	0.0193075	0.00634941	0.00674572	0.0100664	0.003425
-73	0.0160338	0.0211002	0.0109673	0.0126714	0.0190222	0.00632066	0.00688106	0.0102802	0.00348196
-72	0.016226	0.0212596	0.0111924	0.0125475	0.0187788	0.00631617	0.00700171	0.0104654	0.00353796
-71	0.0164162	0.0214293	0.011403	0.0124523	0.0185751	0.00632941	0.00712275	0.0106493	0.00359618
-70	0.0165741	0.0215713	0.0115768	0.0123865	0.0184256	0.00634747	0.00725113	0.0108389	0.00366339
-69	0.0166929	0.0216745	0.0117112	0.0123498	0.0183237	0.00637595	0.00739444	0.0110562	0.00373268
-68	0.0167982	0.0217813	0.0118152	0.0123306	0.0182485	0.00641263	0.00754703	0.0112604	0.00383366
-67	0.0168728	0.0218612	0.0118844	0.0123262	0.0181984	0.00645397	0.00768141	0.0114436	0.00391917
-66	0.0170535	0.022038	0.0120691	0.012368	0.0182274	0.0065086	0.00778319	0.0115722	0.00399415
-65	0.0171071	0.0220877	0.0121265	0.0124489	0.0183124	0.0065853	0.00788128	0.0116943	0.00406829
-64	0.017126	0.0220911	0.0121609	0.0125399	0.0184209	0.0066589	0.00799091	0.0118385	0.00414328
-63	0.0171402	0.0220824	0.0121979	0.0126533	0.0185688	0.00673785	0.00810919	0.0119873	0.00423109
-62	0.0171375	0.0220557	0.0122192	0.0127913	0.0187533	0.00682924	0.00821237	0.0121131	0.00431166
-61	0.0171021	0.0219744	0.0122297	0.0129326	0.0189487	0.00691646	0.00830829	0.0122264	0.00439017
-60	0.0170566	0.0218717	0.0122415	0.0131037	0.0191854	0.00702214	0.00839365	0.0123246	0.00446265
-59	0.0170201	0.0217708	0.0122693	0.0132651	0.019411	0.0071193	0.00849884	0.0124401	0.00455754
-58	0.016986	0.0216627	0.0123094	0.0134391	0.0196522	0.00722608	0.00858937	0.0125406	0.00463816
-57	0.0169627	0.0215618	0.0123635	0.0135707	0.0198362	0.00730522	0.00868033	0.0126405	0.00472013
-56	0.0169566	0.021479	0.0124342	0.0137306	0.0200532	0.00740802	0.00877695	0.0127475	0.00480637
-55	0.0169757	0.0214374	0.0125141	0.0138946	0.020276	0.00751312	0.00888072	0.012863	0.00489846
-54	0.0170305	0.0214493	0.0126117	0.0140278	0.0204473	0.0076082	0.00899245	0.0129889	0.00499596
-53	0.0171268	0.0215392	0.0127144	0.0141201	0.0205497	0.00769045	0.00910817	0.0131213	0.00509501
-52	0.017306	0.0217543	0.0128577	0.0142321	0.0206754	0.00778877	0.00923083	0.013263	0.00519864
-51	0.017509	0.0220479	0.01297	0.0143061	0.0207452	0.00786689	0.00935773	0.0134102	0.0053053
-50	0.0177565	0.0224349	0.0130781	0.0143726	0.0208007	0.00794458	0.00947573	0.013547	0.00540447
-49	0.0180808	0.0229552	0.0132063	0.0143988	0.0207886	0.00800897	0.00960416	0.013694	0.00551437
-48	0.0184349	0.0235577	0.0133121	0.0144154	0.0207601	0.00807062	0.00973568	0.0138397	0.00563169
-47	0.0187832	0.0241916	0.0133747	0.0143946	0.0206678	0.00812139	0.00985134	0.0139637	0.00573898
-46	0.0191993	0.0249242	0.0134744	0.0143598	0.0205554	0.00816422	0.00995513	0.0140677	0.00584257
-45	0.0196282	0.0256839	0.0135726	0.0142984	0.0203985	0.00819837	0.0100535	0.0141566	0.00595044
-44	0.0200627	0.0264553	0.0136701	0.0142203	0.0202111	0.00822958	0.0101148	0.0141837	0.00604583
-43	0.0204872	0.027214	0.0137605	0.0141224	0.0199891	0.00825569	0.0101735	0.0142106	0.00613629
-42	0.020914	0.0279618	0.0138663	0.0140083	0.019749	0.0082676	0.0102188	0.0142227	0.00621494
-41	0.0212886	0.0286258	0.0139513	0.0138642	0.0194607	0.0082678	0.0102214	0.0141635	0.00627919
-40	0.0216371	0.0292287	0.0140455	0.0136993	0.0191449	0.00825375	0.0102112	0.014091	0.00633152
-39	0.0219191	0.0297212	0.014117	0.0135185	0.01881	0.00822697	0.0101758	0.0139822	0.00636943
-38	0.0221457	0.0301092	0.0141823	0.0133213	0.0184555	0.00818697	0.0101063	0.0138161	0.00639641
-37	0.022346	0.0304318	0.0142601	0.013129	0.0181095	0.00814854	0.0100312	0.0136518	0.00641052
-36	0.0224807	0.0306435	0.014318	0.0129114	0.0177325	0.00809028	0.00992233	0.013436	0.0064087
-35	0.0225791	0.0307837	0.0143745	0.0127262	0.0174197	0.00803267	0.00977559	0.0131694	0.00638183
-34	0.0225817	0.0307796	0.0143839	0.012517	0.0170748	0.00795923	0.00963369	0.0129242	0.00634322
-33	0.0225293	0.0306899	0.0143686	0.0123322	0.0167726	0.00789172	0.00948817	0.0126799	0.00629647
-32	0.0224191	0.0305133	0.0143249	0.0121485	0.0164917	0.00780538	0.00937021	0.0124897	0.00625072
-31	0.0222662	0.0302923	0.0142401	0.011975	0.0162296	0.0077204	0.00924491	0.0122988	0.00619099
-30	0.0221267	0.0300747	0.0141787	0.0118026	0.015979	0.0076262	0.00913264	0.0121393	0.006126
-29	0.0219535	0.0298266	0.0140803	0.0116506	0.0157608	0.00754041	0.0090523	0.012039	0.00606555
-28	0.0217669	0.0295748	0.013959	0.0115127	0.0155676	0.00745772	0.00899746	0.0119937	0.00600121
-27	0.0215536	0.0293125	0.0137947	0.0113983	0.0154117	0.00738487	0.00896961	0.0120109	0.00592828
-26	0.0213411	0.0290662	0.013616	0.0112685	0.015231	0.00730607	0.00895887	0.0120688	0.00584895
-25	0.0211367	0.0288459	0.0134276	0.0112027	0.0151383	0.00726699	0.00901214	0.0122476	0.00577665
-24	0.0209178	0.0286248	0.0132108	0.0111458	0.0150577	0.00723382	0.00910189	0.0125021	0.00570173
-23	0.020704	0.0284199	0.0129882	0.0111128	0.0150049	0.00722063	0.00923206	0.0128373	0.00562684
-22	0.020516	0.028249	0.0127831	0.011085	0.0149527	0.00721734	0.00939208	0.0132375	0.0055467
-21	0.0203187	0.028069	0.0125685	0.0110928	0.0149462	0.00723932	0.00958071	0.0136972	0.00546419
-20	0.0201417	0.0279111	0.0123724	0.0111409	0.0149969	0.00728491	0.00981176	0.0142431	0.00538047
-19	0.019961	0.0277427	0.0121793	0.0111931	0.0150476	0.00733861	0.0100596	0.0148118	0.00530731
-18	0.019761	0.0275385	0.0119835	0.0112752	0.0151404	0.00741005	0.0103152	0.0153966	0.0052339
-17	0.0195487	0.0273018	0.0117957	0.011345	0.0152104	0.00747962	0.0105676	0.0159789	0.0051563
-16	0.0193378	0.0270531	0.0116226	0.0114461	0.0153328	0.00755947	0.0108223	0.0165554	0.00508911
-15	0.0191037	0.0267604	0.0114469	0.011561	0.0154705	0.00765144	0.0110693	0.0171077	0.00503094
-14	0.0188786	0.0264567	0.0113005	0.011672	0.0156076	0.00773638	0.0112879	0.0175903	0.00498547
-13	0.0186621	0.0261619	0.0111622	0.0117649	0.0157234	0.00780653	0.0114938	0.0180474	0.00494026
-12	0.0184027	0.0257858	0.0110195	0.0118771	0.0158799	0.00787428	0.0116623	0.0184264	0.00489825
-11	0.0181327	0.0253793	0.0108861	0.0119833	0.0160275	0.00793905	0.0118159	0.0187658	0.00486593
-10	0.0178512	0.0249428	0.0107596	0.0120723	0.0161552	0.00798944	0.0118994	0.018957	0.00484167
-9	0.0175641	0.0244864	0.0106417	0.012194	0.0163188	0.00806926	0.0119354	0.0190727	0.00479809
-8	0.01725	0.0239851	0.0105148	0.0123115	0.0164788	0.00814429	0.0119564	0.0191212	0.00479173
-7	0.0168243	0.0233562	0.0102924	0.0123769	0.0165835	0.00817034	0.011949	0.0190914	0.00480662
-6	0.0165521	0.0229014	0.0102029	0.012422	0.0166682	0.00817583	0.0118926	0.0189675	0.00481777
-5	0.0162621	0.0224217	0.0101025	0.0124671	0.0167552	0.00817901	0.0118058	0.0187721	0.00483946
-4	0.0159672	0.0219354	0.00999898	0.0125003	0.0168254	0.00817524	0.011676	0.0184964	0.00485559
-3	0.0156841	0.021462	0.0099061	0.0125275	0.0168874	0.00816767	0.0115348	0.01818	0.00488953
-2	0.0154219	0.021027	0.00981671	0.0125488	0.016943	0.00815464	0.0113722	0.0178183	0.00492611
-1	0.0152006	0.0206494	0.00975182	0.0125579	0.0169811	0.00813469	0.0111927	0.0174218	0.00496351
0	0.0149881	0.0203007	0.00967555	0.0125811	0.01704	0.00812217	0.0109913	0.0169931	0.0049896
1	0.0148084	0.0200033	0.00961343	0.0126253	0.0171264	0.00812411	0.0108098	0.0165798	0.00503978
2	0.0146674	0.0197715	0.00956342	0.0126824	0.0172283	0.00813636	0.0106295	0.0161686	0.00509041
3	0.0145599	0.0195892	0.00953051	0.012745	0.017336	0.0081541	0.0104544	0.0157675	0.00514124
4	0.0144892	0.0194679	0.00951054	0.0128141	0.017446	0.00818222	0.0102805	0.0153774	0.00518352
5	0.0144643	0.0194144	0.00951427	0.0129262	0.0176145	0.00823803	0.0101208	0.0150127	0.0052289
6	0.0144731	0.0194137	0.00953261	0.0130491	0.0177937	0.0083045	0.0100303	0.0147498	0.00531073
7	0.0144908	0.0194275	0.00955405	0.0131867	0.0179851	0.00838833	0.0100163	0.0145578	0.00547487
8	0.0145646	0.0195223	0.00960701	0.0133734	0.0182338	0.00851307	0.0101955	0.0145848	0.00580615
9	0.0146751	0.019672	0.00967822	0.0135944	0.0185142	0.00867463	0.0104456	0.0146876	0.00620352
10	0.0147787	0.019814	0.00974341	0.0138441	0.0188212	0.00886706	0.0110109	0.0151157	0.00690617
11	0.0149255	0.0200155	0.00983542	0.0141287	0.0191657	0.00909169	0.0118279	0.0158251	0.00783073
12	0.0151291	0.0202981	0.00996011	0.0144625	0.0195503	0.00937469	0.0130808	0.0169705	0.00919104
13	0.0153131	0.0205564	0.0100698	0.0148202	0.0199491	0.00969131	0.0145392	0.0183887	0.0106898
14	0.01549	0.0208087	0.0101713	0.0152438	0.0204057	0.0100819	0.0164976	0.020367	0.0126282
15	0.015678	0.021084	0.010272	0.0157848	0.0209789	0.0105906	0.0190237	0.0229875	0.0150599
16	0.0158422	0.0213254	0.010359	0.0163516	0.0215622	0.011141	0.022352	0.0265441	0.0181599
17	0.0159788	0.0215259	0.0104318	0.0172182	0.0224794	0.011957	0.0263964	0.0309896	0.0218031
18	0.0161241	0.0217487	0.0104996	0.0181756	0.023473	0.0128782	0.0317928	0.0369108	0.0266748
19	0.0162567	0.0219536	0.0105598	0.0194751	0.0248387	0.0141115	0.0382231	0.0440625	0.0323836
20	0.0164323	0.0222014	0.0106631	0.0209845	0.0264634	0.0155055	0.0457669	0.0525678	0.0389661
21	0.0165443	0.0223668	0.0107218	0.022969	0.0286291	0.017309	0.0550403	0.0629603	0.0471203
22	0.0166166	0.0224787	0.0107544	0.0252187	0.0311336	0.0193038	0.0658248	0.0751238	0.0565258
23	0.0167494	0.0226451	0.0108537	0.0278159	0.0340879	0.0215439	0.0783644	0.0892407	0.067488
24	0.0168915	0.022812	0.010971	0.0310268	0.0378187	0.0242348	0.0929486	0.105621	0.0802762
25	0.0171146	0.0230524	0.0111768	0.0348687	0.0423201	0.0274173	0.109929	0.124546	0.095313
26	0.017347	0.0232902	0.0114038	0.0392721	0.0475412	0.031003	0.129174	0.14587	0.112478
27	0.0176539	0.0236006	0.0117073	0.0446505	0.0539503	0.0353506	0.150829	0.16976	0.131899
28	0.0180061	0.0239514	0.0120609	0.0510103	0.0615598	0.0404608	0.174881	0.196162	0.1536
29	0.0184972	0.0244515	0.0125429	0.0581638	0.0701293	0.0461983	0.201704	0.225335	0.178074
30	0.0191576	0.025148	0.0131671	0.0664692	0.0800504	0.0528879	0.231065	0.257109	0.205022
31	0.0199196	0.0259581	0.0138811	0.0758812	0.0912865	0.0604759	0.262891	0.291302	0.23448
32	0.0208787	0.0270148	0.0147426	0.0864234	0.103826	0.0690214	0.296908	0.327586	0.26623
33	0.0220723	0.028347	0.0157976	0.098565	0.118115	0.0790154	0.333044	0.365856	0.300232
34	0.0234194	0.029895	0.0169438	0.111846	0.133739	0.0899531	0.371141	0.405901	0.33638
35	0.025051	0.0318084	0.0182936	0.126486	0.150846	0.102126	0.410796	0.447264	0.374327
36	0.0269197	0.0340355	0.0198039	0.142347	0.169301	0.115392	0.451762	0.48966	0.413864
37	0.0291311	0.0366964	0.0215658	0.159714	0.189304	0.130125	0.493328	0.532289	0.454367
38	0.0316685	0.0397963	0.0235408	0.178397	0.210667	0.146127	0.535207	0.574857	0.495557
39	0.034515	0.0432974	0.0257326	0.198144	0.233152	0.163137	0.577085	0.617025	0.537145
40	0.037705	0.0472527	0.0281573	0.219125	0.25683	0.18142	0.618463	0.658246	0.57868
41	0.0412478	0.0516602	0.0308353	0.240989	0.281335	0.200644	0.658475	0.69771	0.61924
42	0.0451171	0.0565044	0.0337298	0.263756	0.306594	0.220919	0.696777	0.735102	0.658452
43	0.049331	0.0617828	0.0368793	0.287215	0.332397	0.242032	0.732994	0.770019	0.69597
44	0.0538367	0.06744	0.0402334	0.311327	0.35861	0.264044	0.766732	0.802123	0.731342
45	0.0586366	0.0734575	0.0438158	0.335875	0.385004	0.286745	0.797504	0.830987	0.76402
46	0.0636876	0.0797702	0.0476049	0.360821	0.411488	0.310153	0.825043	0.856455	0.793631
47	0.0689504	0.086333	0.0515679	0.385783	0.437651	0.333916	0.849007	0.878256	0.819758
48	0.0744031	0.0931338	0.0556723	0.410856	0.463582	0.358131	0.869359	0.89651	0.842208
49	0.0799548	0.100034	0.0598756	0.435912	0.489131	0.382693	0.886341	0.911617	0.861065
50	0.0858147	0.107226	0.0644036	0.460816	0.514164	0.407468	0.899319	0.923062	0.875576
51	0.091688	0.11443	0.0689463	0.485416	0.53862	0.432212	0.908529	0.931298	0.885761
52	0.0975589	0.121593	0.0735245	0.509712	0.5626	0.456823	0.91402	0.936524	0.891516
53	0.10342	0.128709	0.0781306	0.533433	0.585799	0.481067	0.915994	0.938969	0.893018
54	0.109353	0.135867	0.0828396	0.556604	0.608411	0.504798	0.914761	0.938886	0.890636
55	0.115279	0.142965	0.0875928	0.579045	0.630355	0.527735	0.910574	0.936356	0.884792
56	0.121252	0.150032	0.0924726	0.601032	0.651948	0.550116	0.903601	0.931431	0.875772
57	0.12727	0.157133	0.0974058	0.621827	0.672652	0.571002	0.89427	0.924335	0.864206
58	0.133217	0.164087	0.102347	0.6419	0.692932	0.590868	0.882775	0.915129	0.850421
59	0.139277	0.171103	0.10745	0.660943	0.71258	0.609306	0.86948	0.904118	0.834842
60	0.145762	0.178555	0.11297	0.67896	0.731628	0.626292	0.854676	0.891464	0.817888
61	0.152532	0.18625	0.118814	0.695987	0.75	0.641975	0.838598	0.877355	0.799841
62	0.159191	0.193851	0.124532	0.71175	0.76741	0.656089	0.821584	0.862109	0.781059
63	0.166306	0.201919	0.130692	0.726076	0.783623	0.66853	0.803911	0.845984	0.761838
64	0.173669	0.210246	0.137092	0.739236	0.798729	0.679744	0.78563	0.829017	0.742244
65	0.181535	0.219116	0.143953	0.751107	0.812512	0.689702	0.767382	0.811787	0.722977
66	0.189845	0.228428	0.151262	0.761423	0.824704	0.698142	0.748791	0.794046	0.703535
67	0.198735	0.238368	0.159102	0.770301	0.835262	0.705341	0.730093	0.77603	0.684157
68	0.20818	0.2489	0.167461	0.777798	0.844185	0.711412	0.711601	0.758045	0.665158
69	0.2184	0.260252	0.176547	0.78382	0.851382	0.716258	0.693342	0.740132	0.646552
70	0.229153	0.272183	0.186124	0.788462	0.856906	0.720019	0.67551	0.722574	0.628446
71	0.240657	0.284884	0.196431	0.791723	0.86075	0.722696	0.657977	0.705259	0.610695
72	0.252862	0.298345	0.207379	0.793808	0.863134	0.724482	0.641252	0.688729	0.593775
73	0.265871	0.312698	0.219045	0.79453	0.86392	0.72514	0.625048	0.672682	0.577414
74	0.279358	0.327586	0.23113	0.793981	0.863209	0.724753	0.609573	0.657426	0.56172
75	0.293541	0.34328	0.243801	0.79231	0.861201	0.723418	0.594691	0.642817	0.546565
76	0.308269	0.359628	0.256911	0.789475	0.857953	0.720998	0.580771	0.629228	0.532313
77	0.323533	0.376617	0.270449	0.785682	0.853676	0.717688	0.567313	0.61616	0.518466
78	0.338982	0.393938	0.284025	0.780745	0.848304	0.713187	0.554868	0.604134	0.505601
79	0.354882	0.411852	0.297911	0.774941	0.84211	0.707772	0.543446	0.593139	0.493754
80	0.370847	0.429967	0.311726	0.768022	0.834948	0.701096	0.532663	0.582852	0.482475
81	0.386735	0.448123	0.325346	0.760206	0.827047	0.693364	0.522914	0.573616	0.472212
82	0.402516	0.46625	0.338782	0.75158	0.818573	0.684587	0.514111	0.565407	0.462816
83	0.418009	0.484163	0.351855	0.741987	0.809327	0.674647	0.505906	0.55778	0.454032
84	0.433068	0.501657	0.364478	0.731432	0.799306	0.663558	0.498296	0.550738	0.445854
85	0.447568	0.51858	0.376555	0.720008	0.788631	0.651385	0.491506	0.544595	0.438416
86	0.461186	0.534525	0.387848	0.707384	0.776878	0.637889	0.485343	0.539038	0.431649
87	0.473921	0.549411	0.398431	0.693891	0.76433	0.623452	0.47992	0.534237	0.425603
88	0.485728	0.563123	0.408332	0.679698	0.751154	0.608243	0.474623	0.529559	0.419687
89	0.496251	0.575291	0.417212	0.66465	0.737135	0.592165	0.469735	0.525288	0.414183
90	0.505546	0.585933	0.42516	0.648755	0.72221	0.5753	0.465088	0.521235	0.408941
91	0.513597	0.594963	0.432232	0.63227	0.706648	0.557892	0.460645	0.51739	0.403901
92	0.520248	0.602213	0.438283	0.614874	0.690042	0.539706	0.456183	0.51353	0.398836
93	0.525493	0.60766	0.443326	0.597097	0.672922	0.521273	0.451502	0.509447	0.393557
94	0.529305	0.61126	0.447351	0.578925	0.655301	0.502549	0.446645	0.505165	0.388125
95	0.531694	0.613046	0.450342	0.560553	0.637325	0.483781	0.441371	0.500429	0.382314
96	0.532617	0.612981	0.452253	0.54172	0.618738	0.464702	0.435941	0.495535	0.376348
97	0.532159	0.611194	0.453124	0.522846	0.59992	0.445772	0.429992	0.490059	0.369924
98	0.5304	0.607815	0.452984	0.504155	0.581131	0.42718	0.423405	0.48387	0.36294
99	0.52747	0.602975	0.451964	0.485496	0.562208	0.408784	0.4162	0.476995	0.355405
100	0.523472	0.596908	0.450036	0.467167	0.543503	0.39083	0.408737	0.469822	0.347651
101	0.518326	0.589529	0.447124	0.44906	0.524866	0.373255	0.400721	0.46199	0.339452
102	0.512257	0.581143	0.443371	0.431387	0.506491	0.356284	0.392165	0.453523	0.330806
103	0.505469	0.572047	0.43889	0.414031	0.488314	0.339748	0.383074	0.444409	0.32174
104	0.497898	0.562173	0.433624	0.397104	0.470412	0.323796	0.373575	0.434791	0.312358
105	0.489733	0.551794	0.427671	0.380629	0.452831	0.308428	0.363741	0.424709	0.302773
106	0.481113	0.541064	0.421161	0.364784	0.435747	0.293822	0.353568	0.414156	0.292981
107	0.472053	0.530045	0.414061	0.349296	0.418899	0.279692	0.343044	0.403154	0.282934
108	0.462959	0.519227	0.406691	0.334236	0.402366	0.266105	0.332093	0.391633	0.272553
109	0.453421	0.508109	0.398732	0.319612	0.386171	0.253053	0.321383	0.380285	0.262482
110	0.443901	0.497223	0.390579	0.305596	0.370518	0.240674	0.310756	0.368898	0.252615
111	0.43444	0.48658	0.382301	0.291987	0.355175	0.2288	0.300176	0.357505	0.242848
112	0.425164	0.476295	0.374032	0.278921	0.340364	0.217478	0.289728	0.346171	0.233286
113	0.415964	0.466263	0.365665	0.266298	0.325936	0.20666	0.279363	0.334862	0.223864
114	0.407082	0.456656	0.357509	0.254276	0.312132	0.19642	0.269264	0.323798	0.214729
115	0.398348	0.447305	0.349392	0.242417	0.298505	0.186329	0.259462	0.313029	0.205895
116	0.390069	0.438504	0.341634	0.231583	0.285885	0.177282	0.249974	0.302586	0.197361
117	0.382337	0.430321	0.334353	0.220869	0.273457	0.168281	0.24088	0.292506	0.189253
118	0.374913	0.422507	0.32732	0.210724	0.261625	0.159823	0.232225	0.282903	0.181546
119	0.367567	0.414786	0.320347	0.201042	0.250341	0.151743	0.223956	0.27365	0.174263
120	0.360774	0.407667	0.313882	0.191808	0.239552	0.144064	0.21622	0.264997	0.167443
121	0.354833	0.401352	0.308314	0.183225	0.229487	0.136962	0.208873	0.256763	0.160982
122	0.349107	0.395271	0.302942	0.175407	0.220321	0.130493	0.201965	0.249011	0.154919
123	0.343908	0.389752	0.298065	0.167958	0.211613	0.124303	0.195595	0.241838	0.149352
124	0.338968	0.384506	0.293431	0.161061	0.203516	0.118606	0.189408	0.234911	0.143905
125	0.334445	0.379683	0.289206	0.15491	0.196204	0.113616	0.183963	0.228724	0.139202
126	0.3303	0.375286	0.285314	0.149325	0.189516	0.109135	0.178991	0.223085	0.134898
127	0.326456	0.371203	0.28171	0.14441	0.183531	0.105289	0.174406	0.217832	0.13098
128	0.322772	0.367403	0.27814	0.139991	0.178109	0.101874	0.170153	0.212962	0.127345
129	0.319437	0.36402	0.274853	0.136096	0.173262	0.0989306	0.166253	0.208454	0.124051
130	0.316212	0.360858	0.271566	0.132718	0.168974	0.0964617	0.162774	0.204381	0.121166
131	0.31324	0.358112	0.268368	0.129749	0.165142	0.0943573	0.159614	0.200701	0.118526
132	0.3103	0.355545	0.265054	0.127324	0.161882	0.0927664	0.156738	0.197287	0.116188
133	0.307699	0.35354	0.261858	0.1253	0.159081	0.0915196	0.154138	0.19413	0.114147
134	0.30506	0.35169	0.25843	0.123653	0.156707	0.090599	0.151844	0.191317	0.11237
135	0.302384	0.35	0.254768	0.122231	0.154603	0.0898582	0.149712	0.188661	0.110762
136	0.299675	0.348431	0.250919	0.121084	0.152828	0.0893394	0.147819	0.186251	0.109387
137	0.297026	0.347049	0.247004	0.12022	0.151404	0.0890353	0.146159	0.184097	0.108221
138	0.29412	0.34548	0.242761	0.119418	0.150091	0.088744	0.144616	0.182049	0.107183
139	0.291325	0.344113	0.238538	0.118783	0.149012	0.0885543	0.143166	0.180089	0.106242
140	0.288292	0.342422	0.234162	0.118249	0.148099	0.0883992	0.141813	0.178254	0.105372
141	0.284961	0.34033	0.229592	0.117589	0.147122	0.0880555	0.140423	0.17634	0.104506
142	0.281354	0.337769	0.224939	0.116834	0.14608	0.0875885	0.139213	0.174665	0.103761
143	0.277497	0.334741	0.220252	0.116001	0.144994	0.0870078	0.137915	0.172894	0.102937
144	0.273367	0.331181	0.215553	0.115104	0.143883	0.086325	0.136592	0.171086	0.102097
145	0.268997	0.327071	0.210924	0.114116	0.142704	0.0855289	0.13522	0.169255	0.101186
146	0.264326	0.32233	0.206322	0.112871	0.141256	0.0844854	0.133726	0.167289	0.100162
147	0.259177	0.316787	0.201568	0.111459	0.139631	0.0832873	0.132304	0.165431	0.099178
148	0.253825	0.310703	0.196946	0.109791	0.137732	0.0818495	0.130755	0.163437	0.098073
149	0.248232	0.304075	0.192389	0.108081	0.135758	0.0804045	0.129239	0.161504	0.0969732
