# Supplementary material for: Instantaneous movement-unrelated midbrain activity modifies ongoing eye movements
Source: eLife. 2021 May 6;10:e64150. doi: 10.7554/eLife.64150 (PMC8143798; doi:10.7554/eLife.64150)
Supplement: Figure 3—figure supplement 3—source data 1. [file elife-64150-fig3-figsupp3-data1.xlsx]

## Sheet: A - Contrast task
FR_peak	RF_location	Location legend
146.445	1	1=Near
21.8959	1	2=Far
66.211	1
136.496	1
94.9935	1
17.0852	1
70.4958	1
30.6187	1
136.676	1
78.5786	1
28.7928	1
162.143	1
15.5224	1
45.4521	1
129.359	1
109.933	1
10.645	1
148.07	1
156.212	1
331.817	1
173.413	1
204.099	1
224.688	1
189.464	1
202.433	1
173.148	1
184.637	1
237.408	1
152.528	1
280.292	1
83.1453	1
38.207	1
189.496	2
55.1945	2
88.6331	2
129.4	2
213.509	2
251.691	2
149.982	2
63.2517	2
91.7684	2
49.0362	2
21.0059	2
89.5113	2
308.104	2
187.671	2
83.5725	2
99.1914	2
82.6993	2
19.3112	2
181.35	2
180.35	2
39.401	2
40.0067	2
97.7482	2
211.69	2
121.749	2
75.0786	2
374.657	2
157.422	2
204.748	2
379.635	2
305.594	2
380.268	2
248.13	2
194.075	2
227.579	2
345.586	2
292.808	2
332.011	2
334.047	2
111.641	2
303.497	2
483.919	2
205.148	2
182.186	2
222.716	2
307.606	2
106.703	2
116.795	2
304.836	2
93.5732	2
295.301	2
415.994	2
26.0596	2

## Sheet: B - Spatial frequency task
FR_peak	RF_location	Location legend
139.429	1	1=Near
56.1615	1	2=Far
295.036	1
331.72	1
146.892	1
239.887	1
115.29	1
65.2562	1
175.099	1
49.5268	1
122.489	1
198.332	1
52.9402	1
150.819	1
344.059	1
259.022	1
34.09	1
244.368	1
125.347	1
250.428	1
100.522	1
48.2235	1
150.975	1
256.679	1
102.029	1
301.929	1
217.168	1
116.043	1
169.533	1
107.004	1
92.3747	1
219.209	1
175.628	1
113.361	1
180.202	2
174.471	2
277.076	2
255.248	2
149.444	2
180.075	2
500.981	2
333.132	2
244.5	2
47.7033	2
270.907	2
240.702	2
49.1932	2
90.759	2
84.9978	2
196.116	2
36.9683	2
30.1987	2
392.73	2
90.4568	2
202.456	2
