# Supplementary material for: Instantaneous movement-unrelated midbrain activity modifies ongoing eye movements
Source: eLife. 2021 May 6;10:e64150. doi: 10.7554/eLife.64150 (PMC8143798; doi:10.7554/eLife.64150)
Supplement: Figure 3—source data 1. [file elife-64150-fig3-data1.xlsx]

## Sheet: A - Saccade amplitude (deg)
time	mean_low	low95CI_low	up95CI_low	mean_medium	low95CI_medium	up95CI_medium	mean_high	low95CI_high	up95CI_high
-95	0.121051	0.112295	0.129806	0.12686	0.114715	0.139004	0.119046	0.110751	0.127341
-85	0.120435	0.113146	0.127723	0.124837	0.115618	0.134056	0.116875	0.109946	0.123805
-75	0.119426	0.112983	0.125869	0.123919	0.115916	0.131921	0.119518	0.113085	0.125952
-65	0.11743	0.111632	0.123228	0.123266	0.115426	0.131106	0.118219	0.111906	0.124533
-55	0.119039	0.113312	0.124766	0.118923	0.112775	0.125072	0.1207	0.114596	0.126804
-45	0.11946	0.113675	0.125244	0.118818	0.11286	0.124775	0.120964	0.114565	0.127364
-35	0.12092	0.115071	0.126768	0.120064	0.113948	0.12618	0.121905	0.11544	0.12837
-25	0.123083	0.117346	0.128821	0.118859	0.112998	0.12472	0.118723	0.112527	0.12492
-15	0.122765	0.116916	0.128615	0.119542	0.112899	0.126186	0.120327	0.114104	0.12655
-5	0.121927	0.116025	0.127829	0.120784	0.113994	0.127574	0.119341	0.113128	0.125555
5	0.119921	0.113842	0.126001	0.120658	0.113668	0.127649	0.121356	0.115141	0.12757
15	0.119389	0.113344	0.125434	0.12084	0.113652	0.128029	0.127047	0.119926	0.134169
25	0.12121	0.114399	0.128022	0.129573	0.120922	0.138224	0.161017	0.146455	0.175579
35	0.130886	0.118899	0.142872	0.169769	0.152036	0.187503	0.276998	0.24542	0.308575
45	0.14675	0.132271	0.161228	0.212668	0.186975	0.238361	0.380822	0.34444	0.417204
55	0.160523	0.143239	0.177806	0.263919	0.231761	0.296077	0.479468	0.436946	0.52199
65	0.185338	0.159827	0.210849	0.328271	0.285614	0.370927	0.56082	0.513287	0.608353
75	0.196921	0.166089	0.227754	0.383415	0.330429	0.4364	0.625881	0.571913	0.679849
85	0.20809	0.174923	0.241257	0.389446	0.322183	0.45671	0.554825	0.497377	0.612272
95	0.200018	0.160124	0.239912	0.293838	0.233864	0.353812	0.393301	0.32523	0.461373
105	0.179463	0.143411	0.215515	0.175242	0.138043	0.212441	0.214683	0.17228	0.257085
115	0.152017	0.12918	0.174855	0.13077	0.119125	0.142415	0.143683	0.126258	0.161108
125	0.137686	0.119763	0.155609	0.124599	0.116079	0.13312	0.131175	0.117815	0.144535
135	0.129773	0.113448	0.146099	0.124611	0.115902	0.13332	0.131157	0.116751	0.145563
145	0.129545	0.111454	0.147637	0.125344	0.116178	0.13451	0.131311	0.115611	0.147011

## Sheet: B - Normalized firing rate
time	mean_low	low95CI_low	up95CI_low	mean_medium	low95CI_medium	up95CI_medium	mean_high	low95CI_high	up95CI_high
-100	0.0132855	0.00299264	0.0235785	0.0122901	0.00482883	0.0197514	0.0132551	0.00510715	0.0214031
-99	0.0133701	0.00298481	0.0237554	0.0122489	0.00479973	0.019698	0.013196	0.00510591	0.021286
-98	0.0134442	0.00297367	0.0239147	0.0122102	0.0047731	0.0196473	0.0131342	0.00509984	0.0211685
-97	0.0135088	0.00296928	0.0240484	0.0121466	0.00473268	0.0195605	0.013077	0.00509716	0.0210569
-96	0.0135534	0.00296521	0.0241416	0.0120763	0.00468572	0.0194669	0.0130343	0.00509459	0.020974
-95	0.0135956	0.00297418	0.024217	0.0119957	0.00463141	0.01936	0.0129918	0.005086	0.0208975
-94	0.0136309	0.00298971	0.0242721	0.0119046	0.00456847	0.0192408	0.0129685	0.00507869	0.0208583
-93	0.0136532	0.00300993	0.0242964	0.0117959	0.00449785	0.0190939	0.0129437	0.00506644	0.0208209
-92	0.0136627	0.0030297	0.0242957	0.0117043	0.00442873	0.01898	0.0129319	0.00506145	0.0208024
-91	0.013688	0.00306488	0.0243111	0.0115951	0.0043499	0.0188402	0.0129275	0.00504933	0.0208057
-90	0.0136932	0.00309561	0.0242909	0.0114918	0.00427277	0.0187108	0.0129401	0.0050444	0.0208358
-89	0.0137047	0.0031393	0.0242702	0.0114021	0.00419358	0.0186106	0.0129581	0.00503232	0.020884
-88	0.0137231	0.00318775	0.0242584	0.0113218	0.00412097	0.0185225	0.0129855	0.00502742	0.0209436
-87	0.0137323	0.00323486	0.0242298	0.0112397	0.00404025	0.0184392	0.0130198	0.00502402	0.0210156
-86	0.0137431	0.00328445	0.0242018	0.0111897	0.00397036	0.0184091	0.0130647	0.00502711	0.0211024
-85	0.0137642	0.00333937	0.024189	0.0111477	0.00390437	0.018391	0.0131008	0.00502137	0.0211802
-84	0.0137856	0.00339681	0.0241744	0.0111374	0.00385857	0.0184161	0.0131553	0.00502535	0.0212853
-83	0.0138036	0.00344955	0.0241577	0.0111419	0.0038166	0.0184671	0.0132164	0.00503332	0.0213996
-82	0.0138309	0.00350377	0.0241581	0.0111734	0.00379058	0.0185562	0.0132739	0.00504481	0.0215031
-81	0.0138689	0.0035659	0.0241718	0.011228	0.00378346	0.0186726	0.0133328	0.00505157	0.021614
-80	0.0138911	0.00362014	0.024162	0.0113057	0.00379353	0.0188179	0.0133892	0.00506459	0.0217138
-79	0.013923	0.0036747	0.0241713	0.0113919	0.00381253	0.0189712	0.0134495	0.00508152	0.0218174
-78	0.0139571	0.00372605	0.0241881	0.0115134	0.00385292	0.019174	0.0135174	0.00509945	0.0219354
-77	0.0140016	0.00378202	0.0242213	0.0116392	0.0038982	0.0193801	0.0135796	0.00511821	0.0220411
-76	0.0140506	0.00384195	0.0242594	0.0117827	0.00396176	0.0196037	0.0136397	0.00513864	0.0221408
-75	0.0140862	0.00389425	0.0242781	0.0119351	0.00403277	0.0198375	0.0136969	0.00515802	0.0222358
-74	0.0141445	0.00395877	0.0243302	0.0121114	0.00412306	0.0200997	0.0137498	0.00517657	0.022323
-73	0.0141939	0.00401945	0.0243684	0.0122804	0.00421692	0.0203439	0.0138078	0.00519498	0.0224205
-72	0.0142473	0.00407757	0.0244171	0.0124552	0.00431608	0.0205943	0.0138572	0.00520926	0.0225052
-71	0.01431	0.00413393	0.0244861	0.0126245	0.00441302	0.020836	0.0139086	0.00522208	0.022595
-70	0.0143656	0.00418777	0.0245433	0.0127832	0.00450664	0.0210597	0.013949	0.00522688	0.0226711
-69	0.0144048	0.0042383	0.0245713	0.0129393	0.00459366	0.021285	0.0139909	0.00522637	0.0227553
-68	0.0144603	0.00429725	0.0246233	0.0130829	0.00467585	0.02149	0.0140157	0.0052153	0.0228161
-67	0.014508	0.00434996	0.0246661	0.0132175	0.00475623	0.0216787	0.0140423	0.00519978	0.0228848
-66	0.0145579	0.00440431	0.0247115	0.013322	0.00481464	0.0218293	0.0140692	0.00517979	0.0229587
-65	0.0146068	0.00446209	0.0247515	0.0134203	0.0048798	0.0219608	0.0140952	0.00515205	0.0230384
-64	0.0146456	0.00451708	0.0247742	0.0135044	0.00492812	0.0220806	0.01412	0.00512188	0.0231181
-63	0.0146797	0.00457589	0.0247836	0.0135808	0.0049824	0.0221792	0.014141	0.00508604	0.023196
-62	0.0147126	0.00463598	0.0247893	0.0136281	0.00501941	0.0222367	0.0141698	0.00505297	0.0232866
-61	0.0147508	0.00469907	0.0248025	0.0136862	0.0050629	0.0223095	0.0141955	0.00501914	0.0233719
-60	0.0147897	0.00476386	0.0248156	0.0137149	0.00509859	0.0223312	0.0142138	0.00497756	0.0234501
-59	0.014822	0.00482068	0.0248234	0.0137387	0.00512776	0.0223496	0.0142434	0.00493755	0.0235492
-58	0.0148615	0.00488044	0.0248425	0.0137522	0.0051518	0.0223526	0.0142858	0.00491226	0.0236592
-57	0.0149018	0.00493674	0.0248669	0.0137579	0.00517476	0.0223411	0.0143191	0.00487871	0.0237594
-56	0.014945	0.00498973	0.0249002	0.0137576	0.00519326	0.0223218	0.0143663	0.00485547	0.0238771
-55	0.0150008	0.00504324	0.0249584	0.0137553	0.00521405	0.0222966	0.0144125	0.00483624	0.0239888
-54	0.0150522	0.00508617	0.0250182	0.0137422	0.00521976	0.0222646	0.0144744	0.00483019	0.0241186
-53	0.0151027	0.00512244	0.025083	0.0137328	0.00522119	0.0222444	0.0145466	0.00483745	0.0242557
-52	0.0151542	0.00515424	0.0251542	0.0137167	0.00521905	0.0222144	0.0146061	0.00484167	0.0243704
-51	0.0152115	0.00518185	0.0252411	0.0137098	0.00521049	0.0222091	0.014689	0.004868	0.02451
-50	0.0152677	0.00520517	0.0253303	0.0137033	0.00519632	0.0222104	0.0147795	0.00490847	0.0246505
-49	0.0153342	0.00522686	0.0254416	0.0137106	0.00517818	0.0222431	0.0148789	0.00495953	0.0247983
-48	0.0153769	0.00523626	0.0255175	0.0137144	0.00515398	0.0222748	0.0149908	0.00502255	0.0249591
-47	0.0154197	0.00524046	0.025599	0.0137174	0.00512402	0.0223108	0.015107	0.00508985	0.0251241
-46	0.0154481	0.00524328	0.0256528	0.0137345	0.00509645	0.0223725	0.0152248	0.00516503	0.0252846
-45	0.0154683	0.00523969	0.025697	0.0137487	0.00506612	0.0224313	0.0153525	0.00524262	0.0254624
-44	0.0154685	0.00523298	0.0257041	0.0137715	0.00503642	0.0225065	0.015475	0.00531872	0.0256313
-43	0.0154691	0.00522053	0.0257178	0.013798	0.0050102	0.0225859	0.0155956	0.0053869	0.0258044
-42	0.0154285	0.00519822	0.0256588	0.0138314	0.00498849	0.0226743	0.0157267	0.00545825	0.0259951
-41	0.0153751	0.00517286	0.0255774	0.0138556	0.00497393	0.0227374	0.0158534	0.00551667	0.0261901
-40	0.0153063	0.00514179	0.0254707	0.0138812	0.00496088	0.0228016	0.0159676	0.00555909	0.0263761
-39	0.0152124	0.00510829	0.0253164	0.0139046	0.00495396	0.0228552	0.0160756	0.00558589	0.0265653
-38	0.0151114	0.00507719	0.0251456	0.0139236	0.00494735	0.0228998	0.0161626	0.00558908	0.0267362
-37	0.0149944	0.00504362	0.0249453	0.0139399	0.00494891	0.0229309	0.0162393	0.00558275	0.0268958
-36	0.0148656	0.00501036	0.0247209	0.0139479	0.00495403	0.0229418	0.0163065	0.00556185	0.0270511
-35	0.0147282	0.00498064	0.0244758	0.0139701	0.00496771	0.0229725	0.0163326	0.00552578	0.0271394
-34	0.0145782	0.00495126	0.0242052	0.0139914	0.00498337	0.0229995	0.0163479	0.00547652	0.0272193
-33	0.014434	0.00492513	0.0239429	0.0139766	0.00498884	0.0229644	0.0163359	0.0054137	0.0272582
-32	0.0142749	0.0049025	0.0236473	0.0139716	0.0050026	0.0229407	0.0162937	0.00534948	0.027238
-31	0.0141291	0.0048819	0.0233762	0.0139544	0.0050083	0.0229004	0.0162317	0.00528151	0.027182
-30	0.013988	0.00485973	0.0231162	0.0139243	0.00501345	0.0228351	0.0161417	0.00521449	0.0270688
-29	0.0138417	0.00484209	0.0228414	0.0138919	0.00501083	0.022773	0.0160283	0.00514377	0.0269129
-28	0.0137185	0.00483564	0.0226013	0.0138608	0.00501055	0.0227111	0.0158906	0.00507307	0.0267081
-27	0.0135958	0.00482379	0.0223679	0.0138313	0.00500468	0.0226579	0.0157241	0.005003	0.0264451
-26	0.0134922	0.00482088	0.0221634	0.0137884	0.00498684	0.02259	0.0155353	0.00493318	0.0261373
-25	0.013385	0.00480517	0.0219648	0.0137453	0.0049604	0.0225302	0.0153169	0.00485721	0.0257766
-24	0.0132996	0.00479497	0.0218043	0.0137027	0.00492801	0.0224774	0.0150912	0.00478409	0.0253984
-23	0.0132129	0.00478093	0.0216448	0.0136633	0.004888	0.0224386	0.0148601	0.00470569	0.0250145
-22	0.013125	0.00476065	0.0214893	0.0136295	0.00483895	0.02242	0.0146121	0.00461733	0.0246069
-21	0.0130592	0.00474541	0.021373	0.0136021	0.00478574	0.0224185	0.0143644	0.00452052	0.0242084
-20	0.0129962	0.00472954	0.0212628	0.0135764	0.00472634	0.0224264	0.0141057	0.00441338	0.0237979
-19	0.0129351	0.00470965	0.0211606	0.0135547	0.00467137	0.022438	0.0138403	0.00429699	0.0233837
-18	0.012878	0.00469078	0.0210652	0.0135463	0.00460814	0.0224844	0.0135943	0.00417242	0.0230163
-17	0.0128201	0.00466726	0.0209728	0.0135389	0.00453565	0.0225421	0.0133653	0.0040481	0.0226825
-16	0.0127837	0.00465385	0.0209135	0.0135367	0.00446756	0.0226058	0.0131358	0.00391576	0.0223558
-15	0.0127266	0.00463217	0.0208211	0.0135324	0.00439975	0.0226651	0.0129211	0.00378818	0.022054
-14	0.0126823	0.00461857	0.0207461	0.0135639	0.00434848	0.0227794	0.0127224	0.00366279	0.0217821
-13	0.0126385	0.00461174	0.0206652	0.0135783	0.0042935	0.0228631	0.0125491	0.0035478	0.0215504
-12	0.0125866	0.00460085	0.0205724	0.0136122	0.00425361	0.0229708	0.0123753	0.0034357	0.0213149
-11	0.0125543	0.00459392	0.0205146	0.0136371	0.00421568	0.0230585	0.0122287	0.00334733	0.0211101
-10	0.0125265	0.00459249	0.0204605	0.0136644	0.00419513	0.0231337	0.0120951	0.00326519	0.020925
-9	0.0124851	0.00458763	0.0203827	0.0137038	0.00417964	0.023228	0.0119808	0.00320168	0.0207599
-8	0.012457	0.0045833	0.0203307	0.0137352	0.00417542	0.023295	0.0118739	0.00314973	0.020598
-7	0.0124187	0.00457284	0.0202645	0.0137755	0.00418311	0.0233678	0.0117752	0.00310863	0.0204417
-6	0.0123797	0.00456107	0.0201984	0.0138166	0.0042024	0.0234308	0.0116748	0.00307837	0.0202712
-5	0.0123428	0.00455125	0.0201343	0.0138509	0.00422989	0.0234718	0.0115977	0.00306592	0.0201295
-4	0.0123034	0.00453335	0.0200735	0.0138804	0.00426115	0.0234996	0.0115344	0.00306162	0.0200072
-3	0.0122477	0.00451101	0.0199844	0.0139017	0.00429974	0.0235036	0.0114613	0.00305623	0.0198665
-2	0.0121962	0.00448041	0.019912	0.0139303	0.00433694	0.0235236	0.011393	0.00305913	0.0197268
-1	0.0121327	0.00444774	0.0198176	0.0139647	0.00438907	0.0235404	0.0113277	0.00306165	0.0195937
0	0.0120658	0.00440644	0.0197252	0.0139941	0.0044318	0.0235564	0.0112744	0.00306951	0.0194794
1	0.0119874	0.00435556	0.0196192	0.014018	0.00447319	0.0235629	0.0112	0.00306697	0.0193331
2	0.0119039	0.00430024	0.0195077	0.0140449	0.00450838	0.0235814	0.0111391	0.0030654	0.0192128
3	0.0118134	0.00424357	0.0193832	0.0140695	0.00454098	0.023598	0.0110801	0.00306242	0.0190978
4	0.0117147	0.00418119	0.0192481	0.01409	0.004558	0.023622	0.0110383	0.00306794	0.0190086
5	0.0116098	0.00411184	0.0191078	0.014118	0.00458154	0.0236545	0.0110284	0.00310289	0.0189538
6	0.0115031	0.00403209	0.0189741	0.0141443	0.00460127	0.0236874	0.0110743	0.0032087	0.0189398
7	0.0114003	0.00395124	0.0188493	0.0141709	0.0046177	0.0237242	0.0112624	0.00346192	0.0190628
8	0.0112962	0.0038689	0.0187234	0.0142216	0.00465382	0.0237893	0.0116548	0.00392552	0.0193841
9	0.0111955	0.00378645	0.0186045	0.0143111	0.00472832	0.0238939	0.0122823	0.0046451	0.0199195
10	0.0111045	0.00370729	0.0185017	0.014467	0.00488114	0.0240529	0.0131298	0.0055833	0.0206763
11	0.0110393	0.00364113	0.0184375	0.0147434	0.00515391	0.0243329	0.0142685	0.00681154	0.0217254
12	0.0109881	0.0035792	0.0183969	0.0151343	0.00557461	0.024694	0.0157899	0.00839117	0.0231886
13	0.0109684	0.00353816	0.0183987	0.0156329	0.00611176	0.025154	0.0178275	0.010419	0.0252359
14	0.010993	0.00353494	0.0184511	0.0163441	0.00686926	0.025819	0.020364	0.012854	0.027874
15	0.0110515	0.00356123	0.0185418	0.0171923	0.00779664	0.0265879	0.0235968	0.0158483	0.0313452
16	0.0111439	0.00362021	0.0186675	0.0182786	0.0089512	0.0276061	0.0277459	0.0195573	0.0359346
17	0.0113343	0.00375056	0.0189181	0.0196493	0.010393	0.0289055	0.0327665	0.0238944	0.0416387
18	0.0115787	0.00393719	0.0192203	0.0213711	0.0121558	0.0305863	0.038908	0.0290579	0.0487581
19	0.011899	0.00420278	0.0195953	0.023556	0.0143577	0.0327542	0.0462738	0.0351043	0.0574433
20	0.0123017	0.00454429	0.0200591	0.0263265	0.0170695	0.0355834	0.055052	0.0421872	0.0679167
21	0.0127994	0.00499209	0.0206068	0.0297773	0.0203332	0.0392213	0.0654981	0.0505348	0.0804614
22	0.0134465	0.00558489	0.0213082	0.0339447	0.0241652	0.0437241	0.0777405	0.0603034	0.0951776
23	0.0142392	0.00631388	0.0221645	0.0389706	0.0286583	0.0492828	0.0919674	0.0716693	0.112266
24	0.0152209	0.00720558	0.0232361	0.044988	0.0338654	0.0561105	0.108372	0.0848523	0.131891
25	0.016437	0.00832405	0.0245499	0.0520405	0.0397694	0.0643116	0.126917	0.0998148	0.154019
26	0.017946	0.00970996	0.026182	0.0603414	0.0465879	0.0740949	0.147835	0.116836	0.178834
27	0.0197618	0.0113425	0.0281811	0.0698908	0.0543289	0.0854528	0.171225	0.13608	0.20637
28	0.0218973	0.0132234	0.0305712	0.080948	0.0632783	0.0986176	0.197059	0.15753	0.236588
29	0.0244851	0.0154604	0.0335099	0.0935549	0.0734278	0.113682	0.225422	0.181358	0.269487
30	0.0275612	0.0180274	0.0370949	0.107783	0.0849271	0.13064	0.25622	0.207555	0.304884
31	0.0311829	0.0209756	0.0413903	0.123676	0.0978456	0.149507	0.289323	0.236035	0.342611
32	0.0354537	0.0243495	0.0465578	0.141354	0.112339	0.17037	0.324601	0.266781	0.38242
33	0.0403963	0.0281599	0.0526327	0.160717	0.128362	0.193073	0.361839	0.299693	0.423985
34	0.0461304	0.0325035	0.0597573	0.18191	0.146066	0.217753	0.400755	0.334582	0.466928
35	0.0526573	0.0374063	0.0679083	0.204837	0.165442	0.244232	0.440951	0.371126	0.510776
36	0.0601167	0.0429599	0.0772735	0.229396	0.186451	0.272341	0.482113	0.409115	0.555111
37	0.068586	0.0492344	0.0879376	0.255474	0.20902	0.301928	0.523869	0.448275	0.599463
38	0.0780483	0.0562481	0.0998485	0.282994	0.233141	0.332847	0.565665	0.488096	0.643235
39	0.0886232	0.0641273	0.113119	0.311746	0.258658	0.364834	0.607035	0.52817	0.6859
40	0.100331	0.0728966	0.127765	0.3415	0.285396	0.397604	0.64741	0.567956	0.726865
41	0.11321	0.0826335	0.143787	0.372032	0.313191	0.430873	0.686363	0.607062	0.765664
42	0.127284	0.0933787	0.16119	0.403008	0.341752	0.464264	0.723373	0.644925	0.801821
43	0.142526	0.105134	0.179917	0.434136	0.370817	0.497455	0.75795	0.68103	0.834871
44	0.158977	0.117999	0.199955	0.465099	0.400095	0.530104	0.789644	0.714847	0.86444
45	0.176532	0.131868	0.221197	0.495561	0.429263	0.561859	0.818047	0.745889	0.890205
46	0.195172	0.146777	0.243566	0.525143	0.457961	0.592326	0.842812	0.773674	0.91195
47	0.214837	0.162717	0.266956	0.553411	0.485697	0.621125	0.863678	0.797796	0.929559
48	0.235386	0.179592	0.291179	0.580164	0.512295	0.648033	0.880422	0.817836	0.943008
49	0.256711	0.197336	0.316086	0.604944	0.537246	0.672641	0.892866	0.833416	0.952316
50	0.278633	0.215816	0.34145	0.627518	0.560281	0.694756	0.900982	0.844308	0.957656
51	0.301011	0.234954	0.367069	0.647551	0.580997	0.714104	0.904765	0.850292	0.959238
52	0.323642	0.254574	0.392711	0.664859	0.599161	0.730557	0.90428	0.851278	0.957282
53	0.346252	0.274424	0.41808	0.679248	0.614535	0.743961	0.899711	0.847358	0.952064
54	0.368673	0.294382	0.442964	0.690587	0.626879	0.754294	0.891254	0.838705	0.943803
55	0.390646	0.31419	0.467103	0.698732	0.636012	0.761453	0.879195	0.825677	0.932713
56	0.411953	0.333665	0.490241	0.703748	0.641916	0.76558	0.863883	0.808749	0.919018
57	0.432364	0.352586	0.512142	0.705663	0.644564	0.766761	0.845699	0.788485	0.902913
58	0.45164	0.370698	0.532582	0.704511	0.643924	0.765098	0.82504	0.76541	0.884669
59	0.469562	0.387786	0.551338	0.700525	0.640175	0.760876	0.802309	0.740093	0.864524
60	0.485963	0.403646	0.568281	0.693884	0.63344	0.754329	0.777924	0.71306	0.842789
61	0.500594	0.418003	0.583184	0.684811	0.623908	0.745713	0.752328	0.684832	0.819824
62	0.513411	0.430774	0.596047	0.673578	0.611839	0.735317	0.72588	0.655827	0.795933
63	0.524294	0.441805	0.606782	0.66046	0.59749	0.72343	0.69898	0.626473	0.771487
64	0.533183	0.450979	0.615387	0.645803	0.581209	0.710398	0.671996	0.597139	0.746854
65	0.540024	0.458174	0.621875	0.629918	0.563332	0.696505	0.645183	0.568105	0.72226
66	0.544778	0.463322	0.626233	0.61309	0.544188	0.681991	0.618789	0.539617	0.697961
67	0.547538	0.466447	0.628629	0.5956	0.5241	0.667101	0.593059	0.511909	0.674209
68	0.548386	0.46757	0.629201	0.577735	0.503412	0.652057	0.568196	0.485195	0.651197
69	0.54739	0.466731	0.62805	0.559736	0.482427	0.637046	0.544365	0.459647	0.629083
70	0.544717	0.464051	0.625382	0.541837	0.461451	0.622223	0.52171	0.435419	0.608
71	0.540438	0.459583	0.621293	0.524248	0.440764	0.607731	0.500204	0.412503	0.587906
72	0.534812	0.453573	0.61605	0.507152	0.4206	0.593703	0.479869	0.390887	0.56885
73	0.527945	0.446122	0.609768	0.490605	0.4011	0.580109	0.460768	0.370668	0.550869
74	0.520055	0.437466	0.602644	0.474784	0.38248	0.567089	0.442775	0.351724	0.533826
75	0.511309	0.427796	0.594822	0.459649	0.364749	0.554549	0.42573	0.333864	0.517596
76	0.501853	0.417288	0.586418	0.445271	0.347987	0.542555	0.409792	0.317286	0.502298
77	0.491857	0.406151	0.577563	0.431615	0.332202	0.531027	0.394745	0.30175	0.48774
78	0.481492	0.394575	0.568409	0.418605	0.317343	0.519867	0.380561	0.287244	0.473879
79	0.470878	0.382722	0.559034	0.406188	0.303359	0.509018	0.367114	0.273605	0.460623
80	0.460119	0.370733	0.549505	0.394358	0.290236	0.498479	0.354254	0.260688	0.44782
81	0.449269	0.358696	0.539843	0.3831	0.27799	0.488209	0.341953	0.248478	0.435429
82	0.438442	0.346735	0.530148	0.372334	0.266514	0.478154	0.330125	0.23684	0.42341
83	0.427682	0.334936	0.520428	0.36193	0.255671	0.468189	0.318709	0.225707	0.411711
84	0.416985	0.323305	0.510665	0.351942	0.245514	0.458371	0.307794	0.215212	0.400375
85	0.406373	0.311861	0.500884	0.342199	0.23581	0.448588	0.297182	0.205125	0.389239
86	0.39589	0.300696	0.491085	0.332776	0.226651	0.438902	0.286841	0.195434	0.378249
87	0.385565	0.28981	0.48132	0.323426	0.217785	0.429067	0.276814	0.186147	0.367481
88	0.375317	0.279146	0.471489	0.31426	0.209252	0.419268	0.266984	0.177208	0.35676
89	0.365186	0.268739	0.461632	0.305217	0.201012	0.409421	0.257421	0.168648	0.346194
90	0.355132	0.258541	0.451723	0.296314	0.193071	0.399558	0.248103	0.160468	0.335737
91	0.345129	0.248558	0.441701	0.287449	0.185314	0.389584	0.239019	0.152643	0.325394
92	0.335216	0.2388	0.431632	0.278759	0.177854	0.379665	0.230153	0.145199	0.315106
93	0.325349	0.229229	0.421468	0.270078	0.170509	0.369647	0.221544	0.138089	0.304999
94	0.31555	0.219853	0.411248	0.26149	0.163357	0.359623	0.213219	0.13136	0.295077
95	0.305784	0.210654	0.400913	0.253027	0.15644	0.349614	0.205136	0.124971	0.285301
96	0.29604	0.201628	0.390452	0.244672	0.149751	0.339593	0.197264	0.118877	0.27565
97	0.286409	0.192838	0.379979	0.236399	0.143234	0.329563	0.189737	0.113154	0.266321
98	0.276846	0.184232	0.36946	0.228257	0.136938	0.319575	0.182496	0.107765	0.257226
99	0.267374	0.175854	0.358894	0.220263	0.130859	0.309667	0.175604	0.102733	0.248474
100	0.258014	0.167723	0.348305	0.212415	0.125003	0.299827	0.168984	0.0979691	0.24
101	0.248819	0.159842	0.337796	0.204773	0.119425	0.290121	0.162676	0.0934825	0.231869
102	0.23981	0.152255	0.327366	0.197317	0.114089	0.280545	0.156688	0.0892758	0.224099
103	0.230986	0.144926	0.317047	0.190068	0.108989	0.271146	0.151044	0.0853429	0.216745
104	0.222406	0.137934	0.306877	0.182985	0.104113	0.261857	0.145743	0.0816957	0.209791
105	0.21406	0.131245	0.296876	0.17617	0.0995131	0.252827	0.140748	0.0782585	0.203237
106	0.205946	0.12485	0.287043	0.169642	0.0951961	0.244087	0.136065	0.0750549	0.197075
107	0.198136	0.118806	0.277466	0.163285	0.0910619	0.235508	0.131673	0.0720428	0.191304
108	0.190623	0.113084	0.268163	0.157244	0.087215	0.227274	0.127613	0.0692659	0.18596
109	0.183419	0.107694	0.259143	0.15143	0.0835594	0.219301	0.123836	0.0666951	0.180977
110	0.17651	0.102611	0.250409	0.145938	0.0801692	0.211706	0.120362	0.0643262	0.176399
111	0.169917	0.0978619	0.241972	0.140684	0.0769479	0.20442	0.117167	0.0621826	0.172151
112	0.163681	0.0934401	0.233922	0.135715	0.0739541	0.197476	0.11421	0.0602061	0.168213
113	0.157745	0.0893083	0.226182	0.131025	0.0711348	0.190915	0.111505	0.0584197	0.16459
114	0.15212	0.085446	0.218793	0.126663	0.068536	0.18479	0.109025	0.0567953	0.161254
115	0.146786	0.0818557	0.211716	0.122571	0.0660931	0.179048	0.106746	0.0553301	0.158161
116	0.141722	0.0784993	0.204945	0.11874	0.0638027	0.173678	0.10464	0.0540052	0.155274
117	0.136971	0.0754018	0.19854	0.115229	0.0616917	0.168766	0.102701	0.0528168	0.152585
118	0.132515	0.0725443	0.192485	0.111956	0.0597246	0.164188	0.10092	0.0517436	0.150096
119	0.128312	0.0698838	0.186741	0.108933	0.0578841	0.159981	0.0993092	0.0508195	0.147799
120	0.124453	0.067494	0.181411	0.106182	0.0561918	0.156172	0.097834	0.0499966	0.145672
121	0.120815	0.0652746	0.176355	0.103691	0.0546476	0.152735	0.0964846	0.049289	0.14368
122	0.117435	0.0632262	0.171644	0.101484	0.0532461	0.149722	0.0952633	0.0486756	0.141851
123	0.114303	0.0613494	0.167256	0.0994861	0.0519515	0.147021	0.0941114	0.0481076	0.140115
124	0.111431	0.0596351	0.163227	0.0977147	0.050775	0.144654	0.0930926	0.047657	0.138528
125	0.108853	0.0581361	0.159571	0.0961598	0.0497256	0.142594	0.0921855	0.0473085	0.137062
126	0.106506	0.0567826	0.156229	0.0948198	0.0487847	0.140855	0.0913347	0.0469848	0.135685
127	0.10439	0.0555483	0.153231	0.0936638	0.0479374	0.13939	0.0905873	0.0467438	0.134431
128	0.10251	0.0544785	0.150542	0.0926625	0.0471694	0.138156	0.089953	0.0465821	0.133324
129	0.100871	0.0535534	0.148188	0.0918062	0.0464551	0.137157	0.0893494	0.0464356	0.132263
130	0.0994883	0.0527816	0.146195	0.0910799	0.0458141	0.136346	0.0888465	0.0463722	0.131321
131	0.0982786	0.0521057	0.144452	0.0904753	0.0452307	0.13572	0.0883843	0.0463267	0.130442
132	0.0972746	0.0515506	0.142999	0.0899866	0.044697	0.135276	0.0879975	0.0463463	0.129649
133	0.0964474	0.0510929	0.141802	0.0895701	0.0441974	0.134943	0.087684	0.0463922	0.128976
134	0.0957749	0.0507292	0.140821	0.0892578	0.0437374	0.134778	0.0874495	0.0464896	0.128409
135	0.0952477	0.0504357	0.14006	0.0889663	0.0432997	0.134633	0.0872562	0.0466043	0.127908
136	0.0948648	0.0502332	0.139497	0.0887338	0.0428888	0.134579	0.0871015	0.0467541	0.127449
137	0.0945582	0.0500546	0.139062	0.0885359	0.0425033	0.134568	0.086982	0.0469007	0.127063
138	0.0943296	0.0499172	0.138742	0.0883447	0.0421234	0.134566	0.0868875	0.0470756	0.126699
139	0.094147	0.0497937	0.1385	0.0881558	0.0417499	0.134562	0.0868403	0.0472747	0.126406
140	0.094025	0.0497111	0.138339	0.0879542	0.0414017	0.134507	0.0868325	0.0474879	0.126177
141	0.0939053	0.0496377	0.138173	0.0877234	0.0410351	0.134412	0.0868269	0.0477087	0.125945
142	0.093783	0.0495442	0.138022	0.0874814	0.0406897	0.134273	0.0868456	0.047946	0.125745
143	0.0936555	0.0494468	0.137864	0.0871829	0.0403301	0.134036	0.0868598	0.048167	0.125553
144	0.0935033	0.0493368	0.13767	0.0868658	0.0399922	0.133739	0.0868654	0.0483883	0.125343
145	0.0933161	0.0492074	0.137425	0.0864819	0.0396288	0.133335	0.0868621	0.0485929	0.125131
146	0.0930709	0.0490396	0.137102	0.0860889	0.0392912	0.132887	0.086846	0.0487806	0.124911
147	0.0927412	0.0488195	0.136663	0.0856033	0.0389197	0.132287	0.0868334	0.0489706	0.124696
148	0.0923322	0.0485417	0.136123	0.0850755	0.0385549	0.131596	0.0867916	0.0491452	0.124438
149	0.0918711	0.0482395	0.135503	0.0845031	0.038182	0.130824	0.0867433	0.049307	0.12418
150	0.0913382	0.0478946	0.134782	0.0838771	0.0377986	0.129956	0.0866852	0.049463	0.123907
