# Supplementary material for: Instantaneous movement-unrelated midbrain activity modifies ongoing eye movements
Source: eLife. 2021 May 6;10:e64150. doi: 10.7554/eLife.64150 (PMC8143798; doi:10.7554/eLife.64150)
Supplement: Figure 4—figure supplement 1—source data 1. [file elife-64150-fig4-figsupp1-data1.xlsx]

## Sheet: Sheet1
spikes	mean	SEM_neg	SEM_pos	neuron_type	legend
0	0.135834	-0.00577874	0.00577874	1	1=VM neurons
1	0.232947	-0.0275972	0.0275972	1	2=V neurons
2	0.335317	-0.0483412	0.0483412	1
3	0.398959	-0.0818815	0.0818815	1
4	0.444124	-0.0943825	0.0943825	1
5	0.517933	-0.14195	0.14195	1
0	0.146493	-0.0151947	0.0151947	2
1	0.197375	-0.0481807	0.0481807	2
2	0.193153	-0.0619821	0.0619821	2
3	0.225464	-0.0738976	0.0738976	2
4	0.203084	-0.0505902	0.0505902	2
5	0.314813	-0.212452	0.212452	2
