# Supplementary material for: Instantaneous movement-unrelated midbrain activity modifies ongoing eye movements
Source: eLife. 2021 May 6;10:e64150. doi: 10.7554/eLife.64150 (PMC8143798; doi:10.7554/eLife.64150)
Supplement: Figure 4—figure supplement 2—source data 1. [file elife-64150-fig4-figsupp2-data1.xlsx]

## Sheet: A - Saccade amplitude (deg)
time	mean	SEM_neg	SEM_pos	mean1	mean2	mean3	mean4	mean5
-25	0.0174558	0.017103	0.0178086	0.0172081	0.0169194	0.0174769	0.0167682	0.0178905
-24	0.0173044	0.0169595	0.0176494	0.016867	0.0164837	0.0178841	0.0159756	0.0172137
-23	0.0171219	0.0167814	0.0174624	0.0165338	0.0167119	0.0173999	0.0156432	0.0162744
-22	0.0167096	0.0163765	0.0170428	0.0165213	0.0165944	0.0168547	0.0152042	0.0168202
-21	0.0166176	0.0162912	0.0169439	0.0162563	0.0168903	0.0170404	0.0150874	0.0173755
-20	0.0163604	0.0160462	0.0166747	0.0160126	0.0163547	0.0167757	0.0152304	0.0170079
-19	0.0161919	0.0158876	0.0164962	0.0162181	0.0165639	0.0169857	0.0146607	0.0178079
-18	0.0159472	0.0156533	0.016241	0.0159881	0.016602	0.0168986	0.0140688	0.01745
-17	0.0157808	0.0154985	0.0160631	0.0153947	0.0160799	0.0160638	0.0136201	0.0164402
-16	0.0156353	0.0153642	0.0159063	0.0151952	0.01545	0.0162421	0.01411	0.0160108
-15	0.0154528	0.0151915	0.0157141	0.0149891	0.0156133	0.0154288	0.0150499	0.0149379
-14	0.0153415	0.0150885	0.0155945	0.0149776	0.0154903	0.016236	0.0152457	0.0157903
-13	0.0151765	0.01493	0.015423	0.0146617	0.0155865	0.0162749	0.0145358	0.0176254
-12	0.0148094	0.0145703	0.0150484	0.0146345	0.0146391	0.0156323	0.0139902	0.0163192
-11	0.0146152	0.0143823	0.0148482	0.0146249	0.0142411	0.0145162	0.0140085	0.0151058
-10	0.014291	0.0140666	0.0145154	0.0143853	0.0136222	0.0148104	0.013018	0.0143044
-9	0.0140215	0.0137961	0.014247	0.0143688	0.0136419	0.014675	0.013286	0.0147463
-8	0.0137362	0.0135101	0.0139622	0.0141731	0.0139289	0.014372	0.0133595	0.0140342
-7	0.0135348	0.0133064	0.0137631	0.0137791	0.013943	0.0143159	0.0134786	0.0134451
-6	0.0133343	0.0131136	0.013555	0.0129381	0.012851	0.0136513	0.0128451	0.0138311
-5	0.0124078	0.0121966	0.012619	0.0122273	0.0123482	0.0127174	0.0115945	0.0131173
-4	0.0122684	0.0120588	0.012478	0.0123721	0.0121085	0.013111	0.0116887	0.0124046
-3	0.0114526	0.0112469	0.0116583	0.0115932	0.0113556	0.0126082	0.0121259	0.0115471
-2	0.00989351	0.00970908	0.0100779	0.0101304	0.0100037	0.0107139	0.0110597	0.00958078
-1	0.00741522	0.00728683	0.00754362	0.0076391	0.00745303	0.00767244	0.00777251	0.00754909
0	0	0	0	0	0	0	0	0
1	0.00743036	0.00730527	0.00755546	0.00726563	0.00750917	0.00814065	0.00761835	0.00722562
2	0.0100668	0.00987639	0.0102572	0.00976854	0.0103587	0.0111552	0.0109515	0.0100971
3	0.0116255	0.0114094	0.0118416	0.0116577	0.0119837	0.0130861	0.0119204	0.0120273
4	0.0128112	0.0125794	0.0130429	0.0130116	0.0132751	0.0145347	0.0129175	0.0133592
5	0.014432	0.0141859	0.0146781	0.0146566	0.0141998	0.0153706	0.0148247	0.0149084
6	0.0182113	0.0179299	0.0184926	0.0187712	0.0182396	0.0191657	0.0202034	0.0200668
7	0.0240678	0.0237218	0.0244139	0.0254009	0.0247684	0.0257664	0.028405	0.0268043
8	0.033477	0.0330416	0.0339124	0.0353348	0.0347204	0.0357095	0.0379843	0.0366525
9	0.0462094	0.0456715	0.0467473	0.0492597	0.0479486	0.0487478	0.0510572	0.0492373
10	0.0613961	0.0607093	0.0620828	0.0653367	0.0626166	0.0642821	0.0661288	0.0634616
11	0.0776101	0.076732	0.0784882	0.0833329	0.0786417	0.0807436	0.0825301	0.0793764
12	0.0938992	0.0927875	0.0950109	0.101096	0.0948833	0.097646	0.0980898	0.0943385
13	0.109015	0.107661	0.110369	0.116388	0.109377	0.111626	0.113688	0.108521
14	0.121969	0.120394	0.123544	0.12988	0.122119	0.124295	0.126144	0.121018
15	0.132098	0.130328	0.133869	0.140753	0.132576	0.135827	0.137044	0.130117
16	0.139493	0.137574	0.141413	0.14873	0.14012	0.144068	0.145984	0.139912
17	0.144338	0.142309	0.146367	0.154015	0.145592	0.149226	0.152219	0.146955
18	0.146728	0.144628	0.148827	0.156589	0.148856	0.152597	0.156555	0.152696
19	0.147058	0.144923	0.149193	0.157865	0.150266	0.154525	0.157796	0.15711
20	0.145744	0.143595	0.147894	0.157054	0.149828	0.154543	0.159056	0.161182
21	0.143174	0.14103	0.145319	0.155339	0.148168	0.15483	0.158378	0.163043
22	0.139389	0.137264	0.141513	0.152566	0.146531	0.154001	0.156472	0.163153
23	0.134855	0.132766	0.136944	0.14923	0.144678	0.152285	0.154033	0.164561
24	0.129601	0.127563	0.131639	0.145432	0.142356	0.150901	0.151439	0.164837
25	0.124284	0.122306	0.126263	0.141348	0.139825	0.148918	0.148059	0.163778
26	0.119072	0.117151	0.120994	0.137548	0.136835	0.147103	0.144035	0.163945
27	0.11408	0.112215	0.115945	0.13398	0.133483	0.145128	0.139455	0.161851
28	0.109633	0.107823	0.111442	0.13045	0.130448	0.143326	0.136973	0.159544
29	0.105709	0.103945	0.107474	0.127341	0.128433	0.141307	0.134268	0.157863
30	0.102512	0.100784	0.10424	0.125066	0.126355	0.140382	0.131628	0.155786
31	0.10002	0.0983188	0.10172	0.123548	0.124301	0.139241	0.129825	0.155714
32	0.0981449	0.0964689	0.099821	0.122195	0.122631	0.138754	0.128268	0.153964
33	0.0968134	0.0951564	0.0984705	0.120913	0.121927	0.138528	0.128899	0.153334
34	0.0958771	0.0942309	0.0975233	0.120705	0.121392	0.138646	0.128432	0.153042
35	0.095281	0.093643	0.0969189	0.120283	0.120733	0.138689	0.129099	0.15243
36	0.0950426	0.0934086	0.0966765	0.120494	0.120949	0.138386	0.130425	0.152297
37	0.0951666	0.0935321	0.096801	0.120793	0.121202	0.139071	0.130694	0.152601
38	0.095323	0.093685	0.0969609	0.120467	0.120904	0.139363	0.131186	0.153236
39	0.0956533	0.0940114	0.0972952	0.120673	0.120755	0.139732	0.130959	0.15279
40	0.0959218	0.0942775	0.0975661	0.120783	0.120588	0.139865	0.132072	0.152338
41	0.0961039	0.0944495	0.0977582	0.121232	0.120851	0.139972	0.133284	0.152545
42	0.0963987	0.0947414	0.0980559	0.121468	0.12145	0.140433	0.133587	0.153372
43	0.0967123	0.0950501	0.0983744	0.121223	0.120959	0.140355	0.134307	0.152695
44	0.096953	0.0952842	0.0986219	0.121516	0.121365	0.141209	0.1338	0.151542
45	0.0970938	0.0954138	0.0987737	0.121398	0.121454	0.140978	0.133789	0.151081
46	0.0970968	0.0954095	0.0987842	0.121589	0.122284	0.141502	0.134498	0.151423
47	0.0971627	0.0954717	0.0988536	0.121517	0.122377	0.141432	0.135011	0.151925
48	0.0972108	0.0955149	0.0989067	0.121363	0.122017	0.141257	0.13498	0.151899
49	0.0972914	0.0955891	0.0989936	0.121529	0.122001	0.140922	0.134444	0.152621
50	0.097228	0.09552	0.0989361	0.12135	0.12136	0.140681	0.134108	0.15162

## Sheet: B - regression far RF's
spikes	mean	SEM_neg	SEM_pos
0	0.121848	-0.00325382	0.00325382
1	0.14441	-0.0143788	0.0143788
2	0.145388	-0.0161984	0.0161984
3	0.158141	-0.0222383	0.0222383
4	0.148028	-0.0249741	0.0249741
5	0.170392	-0.0444028	0.0444028
