# Supplementary material for: Instantaneous movement-unrelated midbrain activity modifies ongoing eye movements
Source: eLife. 2021 May 6;10:e64150. doi: 10.7554/eLife.64150 (PMC8143798; doi:10.7554/eLife.64150)
Supplement: Figure 4—figure supplement 3—source data 1. [file elife-64150-fig4-figsupp3-data1.xlsx]

## Sheet: A - Saccade amplitude (deg)
ID	amp_mean1	amp_mean2	amp_mean3	amp_mean4	amp_mean5	amp_mean6	amp_mean7	amp_mean8	amp_mean9	amp_mean10	amp_mean11
0	0.12532	0.151153	0.136917	0.122572	0.12577	0.12164	0.118945	0.107225	0.114223	0.127122	0.119156
1	0.250641	0.252074	0.215935	0.138609	0.132212	0.128882	0.130585	0.139087	0.133365	0.142416	0.119353
2	0.275104	0.343083	0.317169	0.201215	0.151517	0.142516	0.123165	0.114607	0.111618	0.145808	0.150362
3	0.334012	0.383282	0.320278	0.226124	0.180979	0.158443	0.141527	0.144681	0.116411	0.133264	0.139661
4	0.288591	0.504206	0.485799	0.182297	0.141239	0.140259	0.140333	0.157616	0.177274	0.130047	0.165019

## Sheet: B - Slopes (deg per spike)
RF_eccentricity	model_slopes	model_slopes_SE
1	0.0532796	0.00540178
2	0.087135	0.00513467
3	0.0797671	0.00484678
4	0.0275924	0.00344449
5	0.0103816	0.00208065
6	0.00832089	0.00170362
7	0.00576515	0.00209499
8	0.0118023	0.00364399
9	0.00874298	0.00487007
10	0.00303996	0.00447267
11	0.0104494	0.00403455
