# Supplementary material for: Instantaneous movement-unrelated midbrain activity modifies ongoing eye movements
Source: eLife. 2021 May 6;10:e64150. doi: 10.7554/eLife.64150 (PMC8143798; doi:10.7554/eLife.64150)
Supplement: Figure 4—figure supplement 4—source data 1. [file elife-64150-fig4-figsupp4-data1.xlsx]

## Sheet: A - Saccade amplitude (deg)
spikes	SFtowards_mean	CI_towards_UP	CI_towards_Down	SFopposite_mean	CI_opposite_UP	CI_opposite_Down
0	0.136571	0.141921	0.131221	0.11984	0.12328	0.116401
1	0.196654	0.215984	0.177325	0.118428	0.126419	0.110436
2	0.242794	0.278186	0.207402	0.101545	0.109076	0.094013
3	0.284996	0.333123	0.23687	0.122476	0.134768	0.110184
4	0.262892	0.312372	0.213412	0.0958009	0.107583	0.0840184
5	0.366384	0.439904	0.292865	0.140717	0.140717	0.140717
