# Supplementary material for: Instantaneous movement-unrelated midbrain activity modifies ongoing eye movements
Source: eLife. 2021 May 6;10:e64150. doi: 10.7554/eLife.64150 (PMC8143798; doi:10.7554/eLife.64150)
Supplement: Figure 4—source data 1. [file elife-64150-fig4-data1.xlsx]

## Sheet: A - Saccade amplitude (deg)
time	mean	SEM_neg	SEM_pos	mean1	SEM_neg1	SEM_pos1	mean2	SEM_neg2	SEM_pos2	mean3	SEM_neg3	SEM_pos3	mean4	SEM_neg4	SEM_pos4	mean5	SEM_neg5	SEM_pos5
-25	0.0167429	0.016481	0.0170049	0.0163703	0.015854	0.0168865	0.0161044	0.0154827	0.016726	0.0152601	0.0145181	0.0160021	0.0152867	0.0143114	0.0162621	0.0141059	0.0132152	0.0149966
-24	0.0164356	0.0161815	0.0166897	0.0162476	0.0157639	0.0167312	0.0160053	0.0153983	0.0166123	0.0143645	0.0136789	0.01505	0.0149743	0.014026	0.0159227	0.0146914	0.0138277	0.015555
-23	0.0161916	0.0159471	0.0164361	0.0158781	0.0154014	0.0163547	0.0159666	0.015357	0.0165761	0.0141608	0.0134677	0.014854	0.0153691	0.0144383	0.0162999	0.0153776	0.0145197	0.0162356
-22	0.0159863	0.0157434	0.0162293	0.0152946	0.0148277	0.0157615	0.0158907	0.0153282	0.0164532	0.0142858	0.0135867	0.0149849	0.0155818	0.0146907	0.0164728	0.0148427	0.0139285	0.0157569
-21	0.015564	0.0153258	0.0158021	0.0151993	0.014723	0.0156756	0.0153119	0.0147524	0.0158714	0.0147526	0.0140409	0.0154642	0.0150227	0.0141687	0.0158766	0.0153023	0.0144662	0.0161383
-20	0.0155259	0.0152895	0.0157622	0.0150849	0.0145986	0.0155713	0.0147399	0.0141818	0.015298	0.014424	0.0136287	0.0152193	0.0142542	0.0134483	0.01506	0.014911	0.013997	0.015825
-19	0.0152037	0.0149704	0.015437	0.0155164	0.0150153	0.0160175	0.0148959	0.0143485	0.0154433	0.0137521	0.0130136	0.0144906	0.0151753	0.0143256	0.016025	0.0149098	0.0140199	0.0157997
-18	0.0148722	0.0146481	0.0150963	0.0151735	0.0146817	0.0156652	0.0148131	0.0142407	0.0153856	0.0139788	0.0132941	0.0146635	0.0153758	0.0145167	0.0162349	0.0145283	0.0136894	0.0153672
-17	0.0149693	0.0147457	0.015193	0.0149375	0.0144718	0.0154031	0.014667	0.0140799	0.0152542	0.0141279	0.013488	0.0147678	0.0152751	0.0143535	0.0161968	0.014279	0.0134783	0.0150797
-16	0.0146432	0.0144239	0.0148625	0.0145896	0.0141494	0.0150298	0.0143275	0.0137839	0.0148711	0.01342	0.0128279	0.0140122	0.0145169	0.0137261	0.0153078	0.0131949	0.0123724	0.0140174
-15	0.0144138	0.0142009	0.0146267	0.0141919	0.0137567	0.0146271	0.0137728	0.0132411	0.0143045	0.0137041	0.0130964	0.0143117	0.0140261	0.0133035	0.0147486	0.0124846	0.0117073	0.013262
-14	0.0142966	0.014081	0.0145122	0.0141218	0.0136956	0.0145481	0.0138326	0.0133122	0.014353	0.0134227	0.012852	0.0139933	0.0146576	0.0139194	0.0153957	0.0121117	0.0113204	0.012903
-13	0.0143927	0.0141771	0.0146084	0.0144393	0.0140107	0.0148678	0.014051	0.0135232	0.0145788	0.0130661	0.0124957	0.0136365	0.0136115	0.0129919	0.0142312	0.0123655	0.0116102	0.0131208
-12	0.0142681	0.0140567	0.0144794	0.0141265	0.0137044	0.0145487	0.0139294	0.0134002	0.0144585	0.0126535	0.0121256	0.0131813	0.0135234	0.0129869	0.0140599	0.0119073	0.011175	0.0126397
-11	0.0139121	0.0137113	0.0141129	0.0137901	0.0133704	0.0142099	0.0139606	0.0134286	0.0144926	0.0125158	0.0119723	0.0130593	0.0125556	0.0119861	0.0131251	0.0117065	0.0110174	0.0123956
-10	0.0135658	0.013374	0.0137575	0.0138141	0.0134123	0.0142159	0.0137111	0.0132074	0.0142147	0.0123248	0.0117762	0.0128733	0.0118962	0.0113341	0.0124582	0.0120603	0.0113425	0.0127781
-9	0.0136012	0.013408	0.0137944	0.0135906	0.0131856	0.0139957	0.0131554	0.0126631	0.0136477	0.012346	0.0118404	0.0128517	0.0117327	0.0111575	0.0123079	0.0117493	0.0109655	0.0125332
-8	0.0134201	0.0132263	0.013614	0.0130063	0.0126128	0.0133998	0.0131329	0.0126347	0.0136311	0.0123647	0.0118114	0.012918	0.0118884	0.0112615	0.0125153	0.0108462	0.0101445	0.0115479
-7	0.0133097	0.0131145	0.0135048	0.0128046	0.0123896	0.0132195	0.0134698	0.013004	0.0139356	0.0125163	0.0119628	0.0130699	0.0113831	0.0108047	0.0119614	0.0104776	0.00977764	0.0111777
-6	0.0126556	0.0124673	0.0128439	0.0125478	0.0121497	0.0129458	0.0133038	0.0128182	0.0137895	0.0120946	0.0115383	0.0126509	0.0111633	0.0105137	0.0118129	0.0104226	0.00971265	0.0111325
-5	0.0119575	0.0117837	0.0121313	0.011829	0.0114422	0.0122158	0.0120334	0.0115637	0.012503	0.0111523	0.010637	0.0116675	0.00962655	0.00900305	0.01025	0.00994339	0.00925701	0.0106298
-4	0.011754	0.0115859	0.0119221	0.0114584	0.0111148	0.011802	0.0119385	0.0114639	0.0124131	0.0107676	0.0102939	0.0112414	0.0103212	0.00969487	0.0109476	0.00959302	0.00895102	0.010235
-3	0.0108911	0.0107315	0.0110506	0.0106058	0.010286	0.0109255	0.0106029	0.0101757	0.0110302	0.01029	0.00977301	0.0108071	0.010003	0.00939785	0.0106082	0.00903309	0.00843253	0.00963366
-2	0.00958425	0.00944644	0.00972206	0.00901501	0.00874505	0.00928496	0.00927158	0.00888705	0.00965611	0.00956735	0.00903977	0.0100949	0.00839292	0.0079409	0.00884493	0.0078269	0.00729349	0.00836032
-1	0.00711138	0.00701122	0.00721154	0.00674349	0.00654508	0.00694189	0.0069198	0.00664301	0.0071966	0.00718679	0.00680373	0.00756985	0.00590601	0.00563483	0.0061772	0.00720866	0.00669413	0.00772318
0	0	0	0	0	0	0	0	0	0	0	0	0	0	0	0	0	0	0
1	0.00731253	0.00720335	0.00742171	0.00680823	0.00660456	0.0070119	0.00678572	0.00650558	0.00706587	0.00644958	0.00613115	0.00676801	0.00610556	0.00578232	0.00642881	0.00604411	0.00568026	0.00640796
2	0.0096427	0.00949749	0.0097879	0.00917376	0.00888631	0.0094612	0.0088275	0.00845433	0.00920068	0.00850036	0.00804319	0.00895753	0.00805283	0.00763116	0.00847449	0.00718916	0.0065058	0.00787253
3	0.0105485	0.0103865	0.0107105	0.0105462	0.0102323	0.01086	0.0101714	0.00979789	0.0105449	0.010879	0.0103393	0.0114187	0.0099675	0.00947632	0.0104587	0.00998324	0.00912001	0.0108465
4	0.011531	0.0113648	0.0116971	0.0124712	0.0121214	0.0128211	0.0113077	0.0108841	0.0117313	0.0119622	0.0113796	0.0125447	0.0110657	0.0105073	0.0116242	0.0117884	0.0107962	0.0127806
5	0.0128145	0.0126307	0.0129982	0.0137598	0.0133397	0.0141799	0.0131611	0.0126943	0.0136279	0.0139003	0.0131728	0.0146279	0.0132411	0.0125425	0.0139396	0.0140086	0.0131124	0.0149048
6	0.0163797	0.0161407	0.0166186	0.0180644	0.0174557	0.0186731	0.0168795	0.0162367	0.0175224	0.0182721	0.0174024	0.0191417	0.0176146	0.0166274	0.0186017	0.0203462	0.0189541	0.0217383
7	0.0226562	0.0223217	0.0229907	0.025306	0.0243708	0.0262411	0.0247906	0.0237871	0.0257942	0.0260885	0.0249331	0.0272439	0.0253146	0.0237674	0.0268618	0.0301262	0.0282044	0.032048
8	0.0335275	0.0330722	0.0339828	0.0385271	0.0371943	0.0398599	0.0379056	0.0364898	0.0393215	0.0389358	0.0372904	0.0405812	0.0393925	0.0370789	0.041706	0.0452743	0.0423264	0.0482222
9	0.0488824	0.0482842	0.0494805	0.0569564	0.0551838	0.0587289	0.0571735	0.0551656	0.0591813	0.0571197	0.0546943	0.0595451	0.0581893	0.0549583	0.0614204	0.0634121	0.0591474	0.0676767
10	0.0678181	0.067043	0.0685932	0.0794115	0.0770942	0.0817288	0.0804367	0.0776566	0.0832168	0.0787865	0.0752084	0.0823646	0.0820894	0.0774744	0.0867045	0.0883165	0.0820402	0.0945927
11	0.0888558	0.0878525	0.0898591	0.104887	0.101919	0.107856	0.106675	0.102928	0.110423	0.104066	0.0991841	0.108948	0.108152	0.10185	0.114455	0.116941	0.108153	0.125729
12	0.109839	0.108591	0.111086	0.131098	0.127351	0.134844	0.134671	0.129775	0.139568	0.130904	0.124343	0.137464	0.135842	0.12751	0.144173	0.147182	0.135309	0.159055
13	0.129409	0.127893	0.130924	0.156255	0.15167	0.16084	0.162074	0.155866	0.168282	0.157805	0.149389	0.16622	0.164663	0.154156	0.17517	0.179969	0.164402	0.195536
14	0.146234	0.144448	0.148021	0.179014	0.173532	0.184496	0.188537	0.180925	0.196149	0.183509	0.17312	0.193897	0.192715	0.179749	0.205681	0.211743	0.192189	0.231298
15	0.158966	0.156936	0.160997	0.197815	0.191445	0.204186	0.211331	0.202276	0.220385	0.207638	0.195179	0.220098	0.219669	0.204173	0.235166	0.244231	0.220537	0.267925
16	0.167848	0.16561	0.170087	0.213303	0.20608	0.220526	0.231115	0.22062	0.241609	0.229458	0.214973	0.243943	0.244707	0.226664	0.26275	0.273424	0.245344	0.301505
17	0.173138	0.170728	0.175549	0.225587	0.217555	0.233619	0.248178	0.23625	0.260105	0.249469	0.23289	0.266047	0.267149	0.246658	0.28764	0.300533	0.268345	0.332722
18	0.174808	0.172263	0.177353	0.233313	0.224533	0.242093	0.26197	0.248736	0.275204	0.266175	0.247579	0.284771	0.287648	0.264663	0.310633	0.3255	0.289219	0.361781
19	0.17375	0.1711	0.176399	0.237721	0.228227	0.247215	0.272992	0.258516	0.287468	0.280512	0.259965	0.301059	0.305608	0.280317	0.330899	0.346591	0.306562	0.38662
20	0.170477	0.167754	0.1732	0.240162	0.230029	0.250296	0.280997	0.265393	0.296601	0.292934	0.270577	0.315292	0.322682	0.295227	0.350136	0.366773	0.3231	0.410446
21	0.165953	0.163176	0.16873	0.24082	0.23012	0.251519	0.287631	0.270976	0.304286	0.303304	0.279307	0.327301	0.335877	0.306432	0.365321	0.384457	0.337537	0.431378
22	0.160246	0.157437	0.163056	0.239476	0.228298	0.250655	0.292209	0.274634	0.309783	0.311756	0.2862	0.337312	0.346458	0.315366	0.377551	0.401047	0.351325	0.450769
23	0.153956	0.151131	0.156781	0.237033	0.225438	0.248629	0.294528	0.276177	0.312879	0.318117	0.291177	0.345057	0.354994	0.322469	0.387518	0.413595	0.361225	0.465965
24	0.147298	0.144473	0.150124	0.232817	0.220907	0.244726	0.296161	0.277153	0.315169	0.321873	0.293785	0.349961	0.3613	0.327519	0.395081	0.42464	0.370067	0.479213
25	0.140075	0.137256	0.142894	0.228594	0.21644	0.240747	0.295933	0.276464	0.315402	0.324981	0.295948	0.354014	0.366739	0.331912	0.401566	0.435318	0.378935	0.491701
26	0.133365	0.130558	0.136172	0.224227	0.211886	0.236568	0.294733	0.27491	0.314555	0.326315	0.296601	0.35603	0.371352	0.335585	0.40712	0.442448	0.384558	0.500337
27	0.127323	0.12453	0.130115	0.220069	0.207625	0.232514	0.293436	0.273295	0.313577	0.327122	0.296783	0.35746	0.374226	0.33772	0.410732	0.448419	0.389371	0.507466
28	0.121886	0.119112	0.124659	0.216058	0.203558	0.228557	0.292076	0.271734	0.312419	0.327772	0.297036	0.358507	0.377121	0.340006	0.414236	0.452057	0.392127	0.511987
29	0.117709	0.114953	0.120465	0.212895	0.200372	0.225418	0.290421	0.269927	0.310915	0.328205	0.297137	0.359273	0.37839	0.340803	0.415977	0.455194	0.394472	0.515916
30	0.114569	0.111819	0.11732	0.209421	0.196882	0.221959	0.289447	0.268874	0.31002	0.327172	0.295942	0.358403	0.379272	0.341295	0.417248	0.457481	0.396319	0.518643
31	0.112007	0.109261	0.114754	0.206953	0.194429	0.219477	0.287565	0.2669	0.308229	0.326332	0.294947	0.357717	0.379403	0.341197	0.417608	0.458265	0.396993	0.519536
32	0.110564	0.107815	0.113313	0.205841	0.193348	0.218335	0.286702	0.265994	0.30741	0.32633	0.294869	0.357792	0.379822	0.341442	0.418202	0.459334	0.397972	0.520695
33	0.109049	0.106301	0.111797	0.205364	0.192899	0.217829	0.286194	0.265479	0.306908	0.325631	0.29424	0.357021	0.380174	0.341654	0.418693	0.459096	0.397837	0.520355
34	0.108573	0.10582	0.111325	0.204342	0.191924	0.21676	0.284825	0.264151	0.305499	0.325121	0.293857	0.356386	0.379614	0.341158	0.418069	0.459961	0.398709	0.521213
35	0.10847	0.10571	0.111229	0.203965	0.191581	0.216349	0.284926	0.26429	0.305562	0.324381	0.293147	0.355614	0.379136	0.340673	0.417599	0.459171	0.3979	0.520443
36	0.108578	0.105809	0.111346	0.204758	0.192392	0.217123	0.284987	0.264384	0.30559	0.324291	0.293094	0.355487	0.379643	0.341186	0.418101	0.458781	0.397576	0.519986
37	0.108995	0.10622	0.111771	0.205275	0.192952	0.217598	0.28478	0.264185	0.305375	0.324714	0.293589	0.35584	0.379879	0.34142	0.418337	0.458712	0.39767	0.519754
38	0.109376	0.106587	0.112165	0.205134	0.192818	0.217449	0.284865	0.264305	0.305424	0.324448	0.293408	0.355489	0.380184	0.341738	0.418629	0.45868	0.397817	0.519544
39	0.109778	0.106975	0.11258	0.205281	0.192956	0.217606	0.285221	0.264736	0.305707	0.324571	0.293634	0.355509	0.379875	0.341532	0.418218	0.458671	0.397888	0.519454
40	0.110641	0.107826	0.113455	0.205364	0.193029	0.217698	0.285635	0.265159	0.306112	0.324577	0.293665	0.355488	0.379351	0.340962	0.41774	0.458619	0.397889	0.51935
41	0.111072	0.108243	0.113901	0.206138	0.193808	0.218469	0.286341	0.265877	0.306806	0.325333	0.294473	0.356192	0.379036	0.340659	0.417414	0.458951	0.39826	0.519642
42	0.111262	0.108424	0.1141	0.207088	0.194754	0.219422	0.285801	0.265361	0.306241	0.325912	0.295016	0.356808	0.378467	0.34014	0.416795	0.459899	0.399285	0.520513
43	0.111598	0.108741	0.114455	0.207175	0.19483	0.219521	0.286618	0.266202	0.307034	0.325657	0.294811	0.356503	0.379026	0.340743	0.417309	0.459526	0.398978	0.520073
44	0.112156	0.109286	0.115027	0.207533	0.195186	0.219881	0.286977	0.266551	0.307402	0.326748	0.29592	0.357575	0.37915	0.340962	0.417339	0.458784	0.398259	0.519309
45	0.112322	0.109434	0.115209	0.207553	0.195192	0.219913	0.287412	0.266907	0.307917	0.326094	0.295207	0.35698	0.378696	0.340535	0.416857	0.458431	0.397938	0.518924
46	0.112619	0.109714	0.115523	0.207741	0.195373	0.220108	0.28762	0.267117	0.308122	0.326112	0.295222	0.357002	0.378494	0.340303	0.416685	0.459474	0.399051	0.519896
47	0.112709	0.109796	0.115622	0.207453	0.195089	0.219817	0.28718	0.266695	0.307665	0.326258	0.295324	0.357192	0.378862	0.340745	0.416978	0.46006	0.399519	0.520601
48	0.112816	0.109891	0.11574	0.207344	0.194967	0.219722	0.28744	0.266958	0.307922	0.326637	0.295706	0.357567	0.380302	0.342258	0.418347	0.46043	0.399858	0.521001
49	0.112752	0.109814	0.115691	0.207464	0.195092	0.219836	0.287352	0.266852	0.307853	0.326583	0.295638	0.357528	0.380338	0.342331	0.418345	0.459643	0.399057	0.52023
50	0.112785	0.109844	0.115726	0.207394	0.194989	0.219799	0.287048	0.266511	0.307584	0.326591	0.295649	0.357533	0.381965	0.343923	0.420008	0.459917	0.399259	0.520575

## Sheet: B - Regression near RF's
spikes	mean	SEM_neg	SEM_pos	direction	legend
0	0.138438	-0.00573337	0.00573337	1	1=towards
1	0.224216	-0.0239652	0.0239652	1	2=opposite
2	0.298127	-0.0399443	0.0399443	1
3	0.33674	-0.0602132	0.0602132	1
4	0.38653	-0.0751636	0.0751636	1
5	0.460643	-0.119256	0.119256	1
0	0.117752	-0.00414702	0.00414702	2
1	0.119042	-0.0119423	0.0119423	2
2	0.127247	-0.0235747	0.0235747	2
3	0.0972498	-0.0155946	0.0155946	2
4	0.0951994	-0.0207929	0.0207929	2
5	0.106099	-0.0331456	0.0331456	2

## Sheet: C - Saccade velocity
time	mean	SEM_neg	SEM_pos	mean1	SEM_neg1	SEM_pos1	mean2	SEM_neg2	SEM_pos2	mean3	SEM_neg3	SEM_pos3	mean4	SEM_neg4	SEM_pos4	mean5	SEM_neg5	SEM_pos5
-25	1.22441	1.20417	1.24465	1.23996	1.1975	1.28243	1.27244	1.22089	1.324	1.11854	1.05802	1.17907	1.10725	1.03163	1.18288	1.15257	1.06434	1.2408
-24	1.22115	1.20124	1.24106	1.24352	1.20059	1.28645	1.30293	1.25175	1.35411	1.11675	1.05706	1.17643	1.11761	1.04357	1.19166	1.1658	1.08087	1.25073
-23	1.22095	1.20132	1.24058	1.26383	1.22244	1.30522	1.31161	1.26064	1.36259	1.11113	1.0525	1.16975	1.16454	1.09022	1.23887	1.15975	1.0801	1.23939
-22	1.22336	1.20403	1.24269	1.27372	1.2341	1.31335	1.29346	1.24187	1.34505	1.10428	1.04717	1.16138	1.24257	1.16718	1.31797	1.14861	1.07642	1.2208
-21	1.22837	1.20943	1.24731	1.26831	1.22968	1.30694	1.27809	1.22753	1.32864	1.1005	1.04423	1.15677	1.31101	1.23477	1.38725	1.12633	1.05756	1.19509
-20	1.23582	1.21734	1.2543	1.26138	1.22373	1.29903	1.25803	1.20852	1.30754	1.10117	1.04464	1.15769	1.33626	1.25932	1.41319	1.11595	1.045	1.18689
-19	1.23965	1.22146	1.25783	1.25984	1.22287	1.29682	1.2279	1.17771	1.27809	1.11258	1.05515	1.17001	1.3187	1.24413	1.39326	1.13666	1.06057	1.21276
-18	1.24053	1.22241	1.25864	1.27056	1.23407	1.30705	1.20647	1.15593	1.25702	1.13945	1.08184	1.19706	1.26349	1.19368	1.33329	1.17902	1.09717	1.26088
-17	1.24066	1.22251	1.2588	1.27393	1.23626	1.3116	1.20461	1.15534	1.25388	1.13879	1.07733	1.20025	1.18686	1.12144	1.25229	1.20046	1.11003	1.29089
-16	1.23791	1.21964	1.25619	1.27034	1.23096	1.30971	1.19643	1.14775	1.24511	1.15051	1.08702	1.214	1.11149	1.04664	1.17633	1.20296	1.10709	1.29882
-15	1.2394	1.22124	1.25757	1.27186	1.23233	1.3114	1.18618	1.13862	1.23374	1.17203	1.10838	1.23569	1.08718	1.02084	1.15353	1.20096	1.10569	1.29623
-14	1.24041	1.22245	1.25836	1.26471	1.22607	1.30335	1.18111	1.13537	1.22684	1.19592	1.13314	1.25871	1.1339	1.06622	1.20158	1.18584	1.09493	1.27674
-13	1.23476	1.21682	1.25269	1.24602	1.20862	1.28341	1.18389	1.14104	1.22674	1.20124	1.13804	1.26444	1.20546	1.13533	1.27559	1.16513	1.07827	1.25199
-12	1.22897	1.21104	1.24689	1.23307	1.1975	1.26863	1.17812	1.1363	1.21994	1.20746	1.14493	1.26998	1.26238	1.18905	1.33571	1.13344	1.04779	1.2191
-11	1.22807	1.21021	1.24592	1.22638	1.1915	1.26126	1.16138	1.11891	1.20385	1.20351	1.14242	1.2646	1.28096	1.2042	1.35773	1.13508	1.05351	1.21664
-10	1.22888	1.21094	1.24682	1.23222	1.19675	1.26768	1.14827	1.1046	1.19194	1.18912	1.12866	1.24958	1.28104	1.20449	1.3576	1.1503	1.07361	1.22699
-9	1.23335	1.21511	1.25158	1.25892	1.22223	1.29561	1.14265	1.09757	1.18773	1.18922	1.13032	1.24811	1.28004	1.20889	1.35119	1.15212	1.07546	1.22878
-8	1.25185	1.23341	1.27029	1.28811	1.24914	1.32709	1.13925	1.09137	1.18714	1.20834	1.15145	1.26523	1.26761	1.20402	1.3312	1.14474	1.06411	1.22536
-7	1.28469	1.26609	1.30329	1.32778	1.28702	1.36853	1.16617	1.11607	1.21626	1.23131	1.17441	1.28822	1.24877	1.19103	1.30651	1.16591	1.08204	1.24979
-6	1.32506	1.3061	1.34402	1.37137	1.32877	1.41397	1.24419	1.19404	1.29434	1.27471	1.21856	1.33085	1.25474	1.20198	1.30751	1.22371	1.13525	1.31218
-5	1.37717	1.358	1.39634	1.41882	1.37467	1.46297	1.33919	1.28838	1.38999	1.31584	1.25847	1.37321	1.26964	1.21391	1.32537	1.30234	1.20632	1.39836
-4	1.4264	1.40698	1.44582	1.47208	1.42697	1.5172	1.43013	1.37706	1.4832	1.35141	1.29094	1.41189	1.3169	1.25342	1.38038	1.41243	1.31037	1.5145
-3	1.45769	1.43794	1.47744	1.52028	1.47559	1.56497	1.51009	1.45431	1.56587	1.3876	1.32459	1.45061	1.41163	1.34126	1.48201	1.52824	1.42375	1.63273
-2	1.44809	1.42794	1.46824	1.51901	1.47451	1.56351	1.54847	1.48975	1.60718	1.39257	1.32448	1.46066	1.48317	1.40166	1.56468	1.57963	1.47095	1.68831
-1	1.36741	1.34634	1.38849	1.42104	1.37427	1.46781	1.49884	1.43601	1.56166	1.32209	1.2452	1.39898	1.47723	1.38127	1.57319	1.51119	1.3913	1.63108
0	1.26508	1.24317	1.28699	1.30862	1.25992	1.35731	1.38529	1.31931	1.45128	1.24066	1.15677	1.32455	1.41925	1.31133	1.52718	1.38722	1.25531	1.51912
1	1.41164	1.39061	1.43267	1.52673	1.47999	1.57348	1.50941	1.44981	1.569	1.45936	1.38098	1.53773	1.62099	1.52129	1.72069	1.64519	1.52318	1.7672
2	1.89978	1.87057	1.929	2.11673	2.04266	2.1908	1.97205	1.88794	2.05615	2.04737	1.94716	2.14758	2.13535	2.0116	2.25909	2.32401	2.16644	2.48158
3	2.98964	2.94634	3.03295	3.35795	3.2382	3.47769	3.16506	3.0322	3.29791	3.27374	3.1252	3.42229	3.24493	3.04779	3.44208	3.62236	3.36966	3.87507
4	4.70666	4.64791	4.76542	5.35711	5.18814	5.52607	5.18813	4.99926	5.37701	5.15192	4.93311	5.37072	5.21532	4.93083	5.4998	5.74004	5.36994	6.11013
5	6.8495	6.77146	6.92754	7.89421	7.66657	8.12184	7.77809	7.51222	8.04395	7.51934	7.19302	7.84565	7.75739	7.34217	8.17262	8.43015	7.87868	8.98161
6	9.23916	9.13677	9.34156	10.7695	10.4701	11.0689	10.7611	10.3932	11.1289	10.2794	9.81108	10.7478	10.7046	10.1104	11.2989	11.553	10.7432	12.3627
7	11.6815	11.5504	11.8126	13.7695	13.3856	14.1533	13.9433	13.4502	14.4365	13.2673	12.6245	13.91	13.8965	13.0811	14.7119	14.9605	13.8177	16.1033
8	13.9528	13.7905	14.1152	16.6498	16.1722	17.1274	17.0923	16.455	17.7295	16.2835	15.4401	17.1268	17.1356	16.0677	18.2036	18.4615	16.9219	20.0011
9	15.8212	15.6277	16.0147	19.1529	18.5778	19.7281	19.9548	19.1617	20.7479	19.1148	18.0543	20.1753	20.2044	18.865	21.5437	21.8484	19.8668	23.83
10	17.0788	16.8571	17.3005	21.0457	20.3756	21.7159	22.2926	21.3408	23.2443	21.5444	20.2601	22.8286	22.8837	21.2689	24.4984	24.903	22.4588	27.3471
11	17.5753	17.3313	17.8193	22.1449	21.3892	22.9007	23.9132	22.8098	25.0165	23.3851	21.8824	24.8877	24.9912	23.1128	26.8696	27.4321	24.5335	30.3308
12	17.2385	16.9803	17.4967	22.3534	21.5277	23.1792	24.7002	23.462	25.9383	24.5118	22.8081	26.2155	26.3982	24.2837	28.5126	29.3022	25.9873	32.6171
13	16.0942	15.8313	16.3571	21.6635	20.7873	22.5397	24.618	23.2703	25.9658	24.8988	23.0251	26.7726	27.0485	24.7394	29.3577	30.4311	26.7654	34.0969
14	14.2749	14.0173	14.5326	20.1798	19.2757	21.0838	23.7346	22.3095	25.1597	24.5953	22.5934	26.5972	26.9497	24.4973	29.4021	30.7944	26.8631	34.7258
15	12.0432	11.8005	12.2859	18.1255	17.2189	19.0321	22.2258	20.7618	23.6898	23.671	21.5863	25.7557	26.1734	23.6358	28.711	30.4737	26.3795	34.568
16	9.76328	9.54344	9.98311	15.8437	14.9614	16.7259	20.3655	18.9056	21.8254	22.2492	20.1282	24.3702	24.8675	22.3075	27.4275	29.5429	25.391	33.6947
17	7.8495	7.65574	8.04327	13.7005	12.8675	14.5335	18.4943	17.0838	19.9049	20.6106	18.5084	22.7129	23.2115	20.6919	25.731	28.2373	24.1394	32.3353
18	6.74006	6.56951	6.91061	12.0168	11.2531	12.7805	16.8281	15.5052	18.1509	18.9484	16.917	20.9798	21.4464	19.0303	23.8625	26.7515	22.8143	30.6887
19	6.64587	6.49058	6.80116	10.995	10.3143	11.6757	15.3172	14.1014	16.5329	17.4483	15.5367	19.3598	19.7016	17.4407	21.9625	25.1455	21.4545	28.8365
20	7.27043	7.1209	7.41997	10.5366	9.94278	11.1303	14.1439	13.0514	15.2364	16.0297	14.2683	17.7911	18.1007	16.0346	20.1669	23.3474	19.9566	26.7382
21	8.11543	7.96471	8.26616	10.2637	9.7452	10.7822	13.1964	12.2289	14.1639	14.8104	13.2266	16.3941	16.6528	14.8028	18.5028	21.3742	18.3151	24.4333
22	8.80002	8.64396	8.95609	10.0345	9.57656	10.4924	12.3356	11.482	13.1891	13.6613	12.2668	15.0558	15.2219	13.5829	16.8608	19.2769	16.5619	21.9919
23	9.17056	9.00835	9.33277	9.72813	9.31441	10.1419	11.4556	10.6956	12.2155	12.5252	11.3208	13.7297	13.7754	12.3265	15.2242	17.1031	14.7295	19.4767
24	9.20383	9.03729	9.37036	9.25918	8.87355	9.64482	10.556	9.86959	11.2425	11.3545	10.3311	12.3778	12.3151	11.0272	13.6029	14.9576	12.915	17.0001
25	8.93956	8.77201	9.10712	8.65658	8.28942	9.02374	9.65888	9.03022	10.2875	10.1163	9.25627	10.9762	10.8812	9.72562	12.0368	12.9403	11.2139	14.6668
26	8.42643	8.26109	8.59178	7.97253	7.62085	8.32421	8.73694	8.15327	9.32061	8.85062	8.1332	9.56803	9.53248	8.48799	10.577	11.0992	9.66567	12.5326
27	7.72326	7.56292	7.88361	7.25621	6.92144	7.59097	7.83554	7.29129	8.37979	7.60662	7.01016	8.20308	8.30457	7.35785	9.25129	9.46366	8.29241	10.6349
28	6.91014	6.75735	7.06293	6.57207	6.2589	6.88524	6.98083	6.47494	7.48672	6.45789	5.96436	6.95142	7.20637	6.34957	8.06318	8.01251	7.06165	8.96337
29	6.06546	5.92239	6.20853	5.90064	5.61129	6.18999	6.15895	5.69101	6.62688	5.45403	5.04835	5.85971	6.28097	5.51372	7.04823	6.74617	5.96775	7.5246
30	5.24998	5.11812	5.38183	5.24887	4.9845	5.51324	5.41933	4.99225	5.84641	4.58884	4.25591	4.92178	5.49324	4.8144	6.17208	5.70195	5.05198	6.35192
31	4.51114	4.39115	4.63112	4.63348	4.39425	4.87271	4.77884	4.39604	5.16163	3.87579	3.60256	4.14902	4.82804	4.23653	5.41955	4.88176	4.32506	5.43846
32	3.88087	3.77257	3.98918	4.06273	3.84748	4.27798	4.2611	3.92657	4.59562	3.36209	3.14122	3.58297	4.26963	3.76334	4.77593	4.28661	3.8025	4.77071
33	3.37742	3.2799	3.47494	3.5583	3.36516	3.75145	3.78232	3.49497	4.06968	2.98413	2.80414	3.16412	3.80026	3.37471	4.22581	3.83734	3.41195	4.26273
34	2.9891	2.90073	3.07746	3.15926	2.98677	3.33175	3.34987	3.1072	3.59254	2.70436	2.55201	2.85672	3.37758	3.02373	3.73144	3.45383	3.0762	3.83145
35	2.69859	2.61748	2.7797	2.86392	2.70998	3.01787	2.97199	2.76981	3.17417	2.50034	2.36509	2.6356	2.99758	2.70367	3.29149	3.09137	2.75198	3.43076
36	2.49521	2.41973	2.57069	2.65257	2.51403	2.79112	2.65696	2.48817	2.82575	2.36351	2.24039	2.48662	2.65178	2.40355	2.90001	2.77481	2.46995	3.07967
37	2.36558	2.29445	2.4367	2.50267	2.37665	2.62868	2.41795	2.27334	2.56255	2.25648	2.14208	2.37088	2.40008	2.18847	2.61168	2.5003	2.22714	2.77345
38	2.27989	2.21187	2.34792	2.38102	2.26524	2.49679	2.26601	2.13553	2.39649	2.16823	2.06214	2.27431	2.22636	2.04332	2.4094	2.25396	2.00721	2.5007
39	2.20779	2.14143	2.27416	2.26899	2.16217	2.37581	2.16485	2.0378	2.2919	2.05341	1.95121	2.15562	2.09083	1.92818	2.25349	2.0628	1.83989	2.28571
40	2.12894	2.06272	2.19516	2.17438	2.0776	2.27117	2.11288	1.98405	2.24171	1.91484	1.81361	2.01607	1.96052	1.81104	2.10999	1.96196	1.7628	2.16111
41	2.03622	1.96897	2.10348	2.07013	1.9838	2.15645	2.07361	1.94182	2.20541	1.79513	1.69838	1.89189	1.85365	1.71448	1.99282	1.93581	1.75771	2.11391
42	1.9361	1.86737	2.00482	1.95111	1.87434	2.02788	2.02202	1.88825	2.15578	1.68873	1.59835	1.7791	1.78376	1.65143	1.9161	1.927	1.76229	2.0917
43	1.84015	1.77048	1.90981	1.82757	1.75701	1.89813	1.93513	1.80171	2.06855	1.5866	1.50246	1.67073	1.75126	1.61697	1.88555	1.88523	1.7244	2.04606
44	1.75601	1.68666	1.82535	1.71461	1.64379	1.78544	1.83291	1.70391	1.96191	1.49004	1.40991	1.57016	1.7382	1.58342	1.89298	1.81238	1.65305	1.97171
45	1.68157	1.61423	1.74891	1.64303	1.5654	1.72066	1.73845	1.61854	1.85835	1.42905	1.35266	1.50544	1.72605	1.52958	1.92251	1.72896	1.57548	1.88243
46	1.61789	1.55437	1.68142	1.60289	1.51341	1.69238	1.65072	1.54308	1.75837	1.39476	1.32022	1.4693	1.7273	1.47457	1.98002	1.6438	1.50121	1.7864
47	1.56095	1.5027	1.6192	1.57217	1.4688	1.67555	1.58152	1.48841	1.67464	1.36579	1.29096	1.44062	1.71604	1.39671	2.03537	1.56392	1.43762	1.69021
48	1.51542	1.46335	1.56749	1.53961	1.42368	1.65553	1.52504	1.44668	1.6034	1.34448	1.26949	1.41947	1.69514	1.30567	2.0846	1.49623	1.38801	1.60445
49	1.47828	1.43219	1.52437	1.5207	1.39582	1.64558	1.46776	1.40161	1.5339	1.32405	1.25115	1.39694	1.68097	1.22347	2.13847	1.42004	1.32633	1.51375
50	1.44754	1.40588	1.48919	1.51677	1.38679	1.64676	1.42111	1.36365	1.47857	1.29689	1.22756	1.36623	1.70257	1.1844	2.22075	1.32426	1.23679	1.41173
