# Supplementary material for: Instantaneous movement-unrelated midbrain activity modifies ongoing eye movements
Source: eLife. 2021 May 6;10:e64150. doi: 10.7554/eLife.64150 (PMC8143798; doi:10.7554/eLife.64150)
Supplement: Figure 6—figure supplement 1—source data 1. [file elife-64150-fig6-figsupp1-data1.xlsx]

## Sheet: A - N. spikes per 5 ms (Toward)
time	x0_0_08Deg	x0_08_0_16Deg	x0_16_0_24Deg	x0_24_0_32Deg	x0_32_0_48Deg	x0_48_Deg
-97	0.0869565	0.0718954	0.075	0.0588235	0	0
-92	0.119565	0.117647	0.025	0.117647	0	0
-87	0.336957	0.24183	0.05	0.0588235	0	0
-82	0.423913	0.372549	0.075	0	0	0
-77	0.391304	0.379085	0.2	0	0	0
-72	0.282609	0.313725	0.275	0	0	0
-67	0.336957	0.326797	0.2	0	0	0
-62	0.26087	0.248366	0.2	0	0	0.2
-57	0.217391	0.176471	0.275	0	0	0.0666667
-52	0.228261	0.20915	0.125	0.352941	0	0
-47	0.25	0.235294	0.125	0	0	0.0666667
-42	0.217391	0.137255	0.275	0.117647	0	0.2
-37	0.315217	0.222222	0.225	0.294118	0	0.4
-32	0.152174	0.176471	0.3	0.470588	0	0.4
-27	0.130435	0.156863	0.4	0.470588	0	0.466667
-22	0.141304	0.202614	0.375	0.588235	0	0.866667
-17	0.130435	0.261438	0.3	0.352941	0	0.333333
-12	0.217391	0.228758	0.325	0.411765	0	0.866667
-7	0.184783	0.228758	0.325	0.470588	0	0.733333
-2	0.217391	0.281046	0.4	0.470588	0	0.333333
3	0.293478	0.30719	0.4	0.764706	0	0.6
8	0.304348	0.418301	0.4	0.588235	0	0.466667
13	0.326087	0.339869	0.275	0.823529	0	0.466667
18	0.326087	0.398693	0.275	0.647059	0	0.2
23	0.413043	0.313725	0.4	0.470588	0	0.333333
28	0.315217	0.359477	0.4	0.352941	0	0.266667
33	0.304348	0.339869	0.65	0.529412	0	0.2
38	0.217391	0.339869	0.5	0.352941	0	0.2
43	0.26087	0.326797	0.55	0.470588	0	0.0666667
48	0.336957	0.398693	0.475	0.647059	0	0
53	0.369565	0.48366	0.45	0.588235	0	0.333333
58	0.315217	0.568627	0.425	0.352941	0	0.133333
63	0.293478	0.424837	0.475	0.176471	0	0.133333
68	0.413043	0.431373	0.4	0.294118	0	0.2
73	0.228261	0.287582	0.25	0.176471	0	0.0666667
78	0.271739	0.294118	0.25	0.352941	0	0.266667
83	0.152174	0.222222	0.15	0.176471	0	0.0666667
88	0.163043	0.281046	0.15	0.352941	0	0.0666667
93	0.25	0.228758	0.2	0	0	0

## Sheet: B - N. spikes per 5 ms (Opp.)
time	x0_0_08Deg	x0_08_0_16Deg	x0_16_0_24Deg	x0_24_0_32Deg	x0_32_0_48Deg	x0_48_Deg
-97	0.0454545	0.111111	0.0882353	0	0	0
-92	0.136364	0.166667	0.147059	0	0	0
-87	0.113636	0.177778	0.264706	0	0	0
-82	0.227273	0.288889	0.294118	0	0	0
-77	0.363636	0.322222	0.294118	0	0	0
-72	0.590909	0.344444	0.411765	0	0	0
-67	0.568182	0.377778	0.352941	0	0	0
-62	0.545455	0.466667	0.588235	0	0	0
-57	0.681818	0.522222	0.411765	0	0	0
-52	0.590909	0.4	0.411765	0	0	0
-47	0.636364	0.511111	0.264706	0	0	0
-42	0.613636	0.433333	0.294118	0	0	0
-37	0.568182	0.477778	0.323529	0	0	0
-32	0.409091	0.433333	0.441176	0	0	0
-27	0.386364	0.233333	0.294118	0	0	0
-22	0.295455	0.322222	0.235294	0	0	0
-17	0.340909	0.211111	0.323529	0	0	0
-12	0.363636	0.188889	0.352941	0	0	0
-7	0.545455	0.3	0.147059	0	0	0
-2	0.431818	0.233333	0.264706	0	0	0
3	0.545455	0.2	0.323529	0	0	0
8	0.568182	0.233333	0.176471	0	0	0
13	0.522727	0.288889	0.411765	0	0	0
18	0.613636	0.344444	0.441176	0	0	0
23	0.477273	0.2	0.676471	0	0	0
28	0.409091	0.277778	0.441176	0	0	0
33	0.409091	0.411111	0.529412	0	0	0
38	0.295455	0.333333	0.323529	0	0	0
43	0.363636	0.277778	0.323529	0	0	0
48	0.318182	0.311111	0.352941	0	0	0
53	0.227273	0.333333	0.470588	0	0	0
58	0.431818	0.388889	0.382353	0	0	0
63	0.5	0.277778	0.5	0	0	0
68	0.318182	0.377778	0.264706	0	0	0
73	0.340909	0.377778	0.5	0	0	0
78	0.295455	0.266667	0.382353	0	0	0
83	0.204545	0.311111	0.323529	0	0	0
88	0.204545	0.3	0.323529	0	0	0
93	0.136364	0.255556	0.294118	0	0	0
