# Supplementary material for: Instantaneous movement-unrelated midbrain activity modifies ongoing eye movements
Source: eLife. 2021 May 6;10:e64150. doi: 10.7554/eLife.64150 (PMC8143798; doi:10.7554/eLife.64150)
Supplement: Figure 6—figure supplement 2—source data 1. [file elife-64150-fig6-figsupp2-data1.xlsx]

## Sheet: A - N. spikes per 5 ms (Toward)
time	spike_count1	spike_count2	spike_count3	spike_count4	spike_count5	spike_count6
-97.5	0.0811176	0.0430528	0.0636364	0	0	0
-92.5	0.106354	0.0665362	0.0454545	0	0.125	0
-87.5	0.135196	0.0861057	0.0545455	0	0.1875	0.037037
-82.5	0.182515	0.0998043	0.0636364	0	0.25	0.037037
-77.5	0.216764	0.0919765	0.0727273	0	0.125	0
-72.5	0.249662	0.127202	0.0818182	0.0344828	0.125	0.037037
-67.5	0.232537	0.113503	0.1	0	0	0.111111
-62.5	0.250113	0.119374	0.136364	0.0344828	0.125	0.037037
-57.5	0.226228	0.113503	0.0545455	0	0.3125	0.037037
-52.5	0.217215	0.117417	0.0818182	0.0344828	0.25	0.037037
-47.5	0.210005	0.111546	0.0909091	0.0344828	0.125	0.0740741
-42.5	0.166742	0.105675	0.0818182	0.0344828	0.25	0.222222
-37.5	0.16584	0.0821918	0.0909091	0.103448	0.3125	0.148148
-32.5	0.149166	0.0998043	0.127273	0.103448	0.4375	0.333333
-27.5	0.136999	0.0958904	0.1	0.206897	0.25	0.518519
-22.5	0.142406	0.0958904	0.181818	0.551724	0.5	0.481481
-17.5	0.154574	0.129159	0.272727	0.551724	0.5625	0.62963
-12.5	0.181613	0.129159	0.327273	0.724138	1	0.925926
-7.5	0.22082	0.16047	0.372727	0.655172	1.125	0.814815
-2.5	0.222172	0.238748	0.454545	0.551724	1.25	0.777778
2.5	0.268139	0.252446	0.454545	0.344828	1.1875	0.740741
7.5	0.295629	0.191781	0.381818	0.37931	0.75	0.666667
12.5	0.298783	0.240705	0.363636	0.344828	0.5625	0.703704
17.5	0.326273	0.264188	0.390909	0.310345	0.5	0.814815
22.5	0.339793	0.270059	0.318182	0.310345	0.5625	0.666667
27.5	0.387562	0.305284	0.290909	0.482759	0.5625	0.407407
32.5	0.402434	0.330724	0.354545	0.37931	0.1875	0.333333
37.5	0.404236	0.277886	0.309091	0.275862	0.25	0.296296
42.5	0.393871	0.299413	0.245455	0.241379	0.125	0.185185
47.5	0.382154	0.27593	0.218182	0.241379	0.25	0.333333
52.5	0.406489	0.25636	0.245455	0.206897	0.1875	0.259259
57.5	0.408743	0.283757	0.245455	0.413793	0.125	0.333333
62.5	0.422713	0.340509	0.290909	0.482759	0.1875	0.518519
67.5	0.371789	0.268102	0.327273	0.413793	0.5625	0.444444
72.5	0.33123	0.273973	0.309091	0.275862	0.125	0.37037
77.5	0.263632	0.219178	0.181818	0.241379	0.25	0.222222
82.5	0.236142	0.172211	0.209091	0.206897	0.4375	0.481481
87.5	0.21406	0.170254	0.218182	0.172414	0.5	0.444444
92.5	0.200541	0.178082	0.227273	0.103448	0.1875	0.37037
97.5	0.196034	0.187867	0.190909	0.137931	0.125	0.333333

## Sheet: B - N. spikes per 5 ms (Opp.)
time	spike_count1	spike_count2	spike_count3	spike_count4	spike_count5	spike_count6
-97.5	0.102076	0.0484581	0	0.0909091	0.166667	0.3
-92.5	0.133218	0.0748899	0.111111	0	0.166667	0.1
-87.5	0.186275	0.0837004	0.111111	0	0	0
-82.5	0.232411	0.0837004	0.148148	0	0	0.1
-77.5	0.304498	0.171806	0.0740741	0.0909091	0.166667	0
-72.5	0.332757	0.145374	0.037037	0.0909091	0.333333	0
-67.5	0.370819	0.22467	0.222222	0.0909091	0.5	0
-62.5	0.360438	0.215859	0.185185	0	0	0
-57.5	0.332757	0.189427	0.148148	0	0.333333	0.2
-52.5	0.301038	0.211454	0.111111	0.0909091	0	0
-47.5	0.27105	0.185022	0.148148	0.0909091	0.166667	0.1
-42.5	0.237601	0.211454	0.111111	0.0909091	0.166667	0.1
-37.5	0.199539	0.202643	0.148148	0	0.333333	0.1
-32.5	0.179354	0.193833	0.111111	0.0909091	0.5	0.2
-27.5	0.16436	0.162996	0.222222	0	0.333333	0.1
-22.5	0.142445	0.15859	0.111111	0	0.666667	0.3
-17.5	0.163206	0.127753	0.111111	0.0909091	0.5	0.2
-12.5	0.16263	0.14978	0.296296	0.0909091	0.166667	0.4
-7.5	0.16436	0.162996	0.259259	0.0909091	0.333333	0
-2.5	0.206459	0.211454	0.296296	0.0909091	0.666667	0.1
2.5	0.216263	0.202643	0.185185	0	0.333333	0.4
7.5	0.257209	0.171806	0.185185	0.0909091	0.333333	0.6
12.5	0.286044	0.251101	0.296296	0.0909091	0.666667	0.5
17.5	0.304498	0.273128	0.296296	0.272727	0.166667	0.6
22.5	0.360438	0.356828	0.222222	0.454545	0	0.3
27.5	0.396194	0.409692	0.37037	0.363636	0	0.2
32.5	0.428489	0.400881	0.37037	0.636364	0.333333	0.5
37.5	0.470588	0.405286	0.296296	0.818182	0	0.5
42.5	0.475779	0.409692	0.37037	0.636364	0.166667	0.8
47.5	0.478085	0.356828	0.555556	0.545455	0.166667	0.5
52.5	0.466551	0.374449	0.296296	0.363636	0.166667	0.3
57.5	0.490773	0.427313	0.296296	0.181818	0.166667	0.2
62.5	0.469435	0.387665	0.407407	0.272727	0	0.5
67.5	0.39504	0.374449	0.407407	0.181818	0.5	0.3
72.5	0.326413	0.370044	0.222222	0.181818	0.166667	0.2
77.5	0.313725	0.321586	0.333333	0.0909091	0	0.3
82.5	0.275663	0.251101	0.259259	0.0909091	0	0.3
87.5	0.245098	0.277533	0.222222	0.363636	0	0.5
92.5	0.251442	0.339207	0.222222	0.0909091	0	0.3
97.5	0.227797	0.286344	0.296296	0.181818	0.166667	0.2
