# Supplementary material for: Instantaneous movement-unrelated midbrain activity modifies ongoing eye movements
Source: eLife. 2021 May 6;10:e64150. doi: 10.7554/eLife.64150 (PMC8143798; doi:10.7554/eLife.64150)
Supplement: Figure 6—source data 1. [file elife-64150-fig6-data1.xlsx]

## Sheet: A - N. spikes per 5 ms (Toward)
time	spike_count1	spike_count2	spike_count3	spike_count4	spike_count5	spike_count6
-97.5	0.0662432	0.0589971	0.0458716	0	0	0.0186916
-92.5	0.0771325	0.0589971	0.00917431	0.0263158	0	0.00934579
-87.5	0.102541	0.0501475	0.00917431	0.0263158	0	0.0373832
-82.5	0.118875	0.0501475	0.0183486	0.0263158	0	0.0280374
-77.5	0.126134	0.0737463	0.0275229	0	0.0181818	0.0560748
-72.5	0.11706	0.0678466	0.0275229	0.0131579	0	0.0560748
-67.5	0.106171	0.0707965	0.0275229	0.0131579	0	0.0560748
-62.5	0.0744102	0.0530973	0.0366972	0.0263158	0	0.0373832
-57.5	0.0852995	0.0678466	0.00917431	0.0394737	0	0.0373832
-52.5	0.0707804	0.0766962	0.0642202	0.0657895	0	0.102804
-47.5	0.0771325	0.0766962	0.0458716	0.105263	0.0181818	0.149533
-42.5	0.0635209	0.0501475	0.0642202	0.131579	0.0181818	0.233645
-37.5	0.0508167	0.0943953	0.110092	0.223684	0.0909091	0.420561
-32.5	0.0571688	0.0855457	0.201835	0.368421	0.272727	0.495327
-27.5	0.0462795	0.100295	0.275229	0.460526	0.509091	0.719626
-22.5	0.0480944	0.109145	0.247706	0.684211	0.836364	1.05607
-17.5	0.0571688	0.115044	0.302752	0.763158	0.8	1.17757
-12.5	0.0880218	0.132743	0.385321	0.736842	0.890909	1.28037
-7.5	0.105263	0.147493	0.513761	0.868421	0.763636	1.11215
-2.5	0.128857	0.224189	0.449541	1.02632	1.03636	0.962617
2.5	0.150635	0.230088	0.504587	0.697368	0.981818	0.831776
7.5	0.199637	0.20649	0.357798	0.631579	0.854545	0.831776
12.5	0.216878	0.235988	0.302752	0.592105	0.727273	0.654206
17.5	0.225953	0.185841	0.284404	0.552632	0.527273	0.46729
22.5	0.255898	0.221239	0.293578	0.539474	0.472727	0.448598
27.5	0.251361	0.171091	0.238532	0.289474	0.472727	0.336449
32.5	0.249546	0.150442	0.275229	0.355263	0.509091	0.439252
37.5	0.228675	0.112094	0.192661	0.223684	0.345455	0.364486
42.5	0.217786	0.159292	0.155963	0.223684	0.290909	0.271028
47.5	0.207804	0.129794	0.119266	0.210526	0.345455	0.308411
52.5	0.186933	0.144543	0.174312	0.236842	0.436364	0.308411
57.5	0.218693	0.159292	0.174312	0.25	0.327273	0.224299
62.5	0.157895	0.182891	0.155963	0.197368	0.290909	0.196262
67.5	0.137024	0.0943953	0.146789	0.223684	0.181818	0.0747664
72.5	0.149728	0.129794	0.192661	0.118421	0.0727273	0.0934579
77.5	0.118875	0.0855457	0.174312	0.144737	0.127273	0.0934579
82.5	0.128857	0.0914454	0.110092	0.210526	0.0181818	0.0747664
87.5	0.118875	0.0648968	0.100917	0.118421	0.109091	0.0560748
92.5	0.0862069	0.0648968	0.146789	0.118421	0.0909091	0.102804
97.5	0.0862069	0.0619469	0.100917	0.131579	0.127273	0.102804

## Sheet: B - N. spikes per 5 ms (Opp.)
time	spike_count1	spike_count2	spike_count3	spike_count4	spike_count5	spike_count6
-97.5	0.0709838	0.0443038	0	0	0.2	0
-92.5	0.0983811	0.0886076	0	0	0	0
-87.5	0.140722	0.0759494	0	0	0.2	0
-82.5	0.22665	0.113924	0	0	0.2	0
-77.5	0.251557	0.120253	0.103448	0	0	0
-72.5	0.277709	0.14557	0	0	0	0
-67.5	0.250311	0.132911	0.0689655	0	0	0.142857
-62.5	0.237858	0.170886	0.103448	0	0	0.142857
-57.5	0.214197	0.126582	0.0689655	0	0	0.428571
-52.5	0.190535	0.107595	0.103448	0	0	0.428571
-47.5	0.161893	0.0886076	0.103448	0	0	0.428571
-42.5	0.135741	0.101266	0.172414	0	0	0.142857
-37.5	0.108344	0.0822785	0.0689655	0	0	0.142857
-32.5	0.0784558	0.0632911	0.0689655	0	0	0
-27.5	0.0859278	0.0189873	0.137931	0	0	0
-22.5	0.0722291	0.0126582	0.0689655	0	0	0
-17.5	0.0523039	0.00632911	0.0344828	0	0	0
-12.5	0.0510585	0.0253165	0.0344828	0.1	0.2	0
-7.5	0.0635118	0.0506329	0.0344828	0	0.4	0
-2.5	0.0734745	0.0379747	0.0344828	0.1	0.2	0.142857
2.5	0.107098	0.0822785	0.0344828	0	0	0
7.5	0.0933998	0.120253	0.137931	0	0.2	0
12.5	0.118306	0.158228	0.137931	0.1	0	0
17.5	0.119552	0.177215	0.206897	0.1	0	0
22.5	0.166874	0.240506	0.206897	0.2	0.2	0.142857
27.5	0.181818	0.170886	0.206897	0.1	0	0.142857
32.5	0.195517	0.21519	0.206897	0.5	0.4	0.142857
37.5	0.211706	0.139241	0.103448	0.5	0.2	0.142857
42.5	0.212951	0.101266	0.103448	0.3	0	0.428571
47.5	0.215442	0.14557	0.241379	0.4	0.2	0.285714
52.5	0.199253	0.151899	0.137931	0.5	0	0.285714
57.5	0.196762	0.177215	0.206897	0.2	0	0.142857
62.5	0.178082	0.151899	0.241379	0	0.2	0.142857
67.5	0.185554	0.158228	0.206897	0.3	0	0.285714
72.5	0.138232	0.113924	0.206897	0	0	0.285714
77.5	0.128269	0.0949367	0.0344828	0.1	0.4	0.285714
82.5	0.115816	0.0632911	0.172414	0	0.4	0.285714
87.5	0.0859278	0.0632911	0.137931	0.1	0	0
92.5	0.0971357	0.00632911	0.0344828	0	0.4	0.285714
97.5	0.0884184	0.0253165	0	0	0	0.142857
