# Supplementary material for: Instantaneous movement-unrelated midbrain activity modifies ongoing eye movements
Source: eLife. 2021 May 6;10:e64150. doi: 10.7554/eLife.64150 (PMC8143798; doi:10.7554/eLife.64150)
Supplement: Figure 7—figure supplement 1—source data 1. [file elife-64150-fig7-figsupp1-data1.xlsx]

## Sheet: A - spikes raster
t-150	t-149	t-148	t-147	t-146	t-145	t-144	t-143	t-142	t-141	t-140	t-139	t-138	t-137	t-136	t-135	t-134	t-133	t-132	t-131	t-130	t-129	t-128	t-127	t-126	t-125	t-124	t-123	t-122	t-121	t-120	t-119	t-118	t-117	t-116	t-115	t-114	t-113	t-112	t-111	t-110	t-109	t-108	t-107	t-106	t-105	t-104	t-103	t-102	t-101
0	0	0	0	0	0	0	0	0	0	0	0	0	1	0	0	0	0	0	0	0	0	0	0	0	0	0	1	0	0	0	0	0	0	0	0	0	0	0	0	0	0	0	0	0	0	0	0	0	0
0	0	0	0	0	0	0	0	0	0	0	0	0	0	0	0	1	0	0	0	0	0	0	0	0	0	0	0	0	0	0	0	0	0	0	0	0	0	0	0	0	0	0	0	0	0	1	0	0	0
0	0	0	0	0	0	0	0	0	0	0	0	0	0	0	0	0	0	0	0	0	0	0	0	0	0	0	0	0	0	0	0	0	0	0	0	0	0	0	0	0	0	0	0	0	0	0	0	0	0
0	0	0	0	0	0	0	0	0	0	0	0	0	0	0	0	0	1	0	0	0	0	0	0	0	0	0	0	0	0	0	0	0	0	0	0	0	0	0	0	0	0	0	0	0	0	0	0	0	0
0	0	0	0	0	0	0	0	0	0	0	0	0	0	0	0	0	0	0	0	0	0	0	0	0	0	0	0	0	0	0	0	0	0	0	0	1	0	0	0	0	0	0	0	0	0	0	0	0	1
0	0	0	0	0	0	0	0	0	0	0	0	0	0	0	0	0	0	0	0	0	0	0	0	0	0	0	0	0	0	1	0	0	0	0	0	0	0	0	0	0	0	0	0	0	0	0	0	0	0
0	0	0	0	0	0	0	0	0	0	0	0	0	0	0	0	0	0	0	0	0	0	0	0	0	0	0	0	0	0	0	0	0	0	0	0	0	0	0	0	0	0	0	0	0	0	0	0	0	0
0	0	0	0	0	0	0	0	0	0	0	0	0	0	0	0	0	0	0	0	0	0	0	0	0	0	0	0	0	0	0	0	0	0	0	1	0	0	0	0	0	0	0	0	0	0	0	0	0	0
0	0	0	0	0	0	0	0	0	0	0	0	0	0	0	0	0	1	0	0	0	0	0	0	0	0	0	0	0	0	0	0	0	0	0	0	0	0	0	0	0	0	0	0	1	0	0	0	0	0
0	0	0	0	0	0	0	0	0	0	0	0	0	0	0	0	0	0	0	0	0	0	0	0	0	0	0	0	0	0	0	0	0	0	0	0	0	0	0	0	0	0	0	0	0	0	0	0	0	0
0	0	0	0	0	0	0	0	0	0	0	0	0	0	0	0	0	0	0	0	0	0	0	0	0	0	0	0	0	0	0	0	0	0	0	0	0	0	0	0	0	1	0	0	0	0	0	0	0	0
0	0	0	0	0	0	0	0	0	0	0	0	0	0	0	0	0	0	0	0	0	0	0	0	0	0	0	0	0	0	1	0	0	0	0	0	0	0	0	0	0	0	0	0	0	0	0	0	0	0
0	0	0	0	0	0	0	0	0	0	0	0	0	0	0	0	0	0	0	0	0	0	0	0	0	0	0	0	0	0	0	0	0	0	1	0	0	0	0	0	0	0	0	0	0	0	0	0	0	0
0	0	0	0	0	0	0	0	0	0	0	0	0	0	0	0	0	0	0	0	0	0	0	0	0	0	0	0	0	0	0	0	1	0	0	0	0	0	0	0	0	0	0	0	0	0	0	0	0	0
0	0	0	0	0	1	0	0	0	0	0	0	0	0	0	0	0	0	0	0	0	0	0	0	0	0	0	0	0	0	0	0	0	0	0	0	0	0	0	0	0	1	0	0	0	0	0	0	0	0
0	0	0	0	0	0	0	0	0	0	0	0	0	0	0	0	0	0	1	0	0	0	0	0	0	0	0	0	0	0	0	0	0	0	0	0	0	0	0	1	0	0	0	0	0	0	0	0	0	0
0	0	1	0	0	0	0	0	0	0	0	0	0	0	0	0	0	0	0	0	0	0	0	0	0	0	0	0	1	0	0	0	0	0	0	0	0	0	0	0	0	0	0	0	0	0	0	0	0	0
0	0	0	0	0	0	0	0	0	0	0	0	0	0	0	0	1	0	0	0	0	0	0	0	0	0	0	0	0	0	0	0	0	0	0	0	0	0	0	0	0	0	0	0	0	0	0	0	0	0
0	0	0	0	0	0	0	0	0	0	0	0	0	0	0	0	0	0	0	0	0	0	0	0	0	0	0	0	0	0	0	0	0	0	0	0	0	0	0	0	0	0	0	0	0	0	0	0	0	0
0	0	0	0	0	0	0	0	0	0	0	0	0	0	0	0	0	0	0	0	0	0	0	0	0	0	0	0	0	0	0	0	0	0	0	0	0	0	0	0	0	1	0	0	0	0	0	0	0	0
0	0	0	0	0	0	0	0	0	0	0	0	0	0	0	0	0	0	0	0	0	0	0	0	0	0	0	0	0	0	0	0	1	0	0	0	0	0	0	0	0	0	0	0	0	0	0	0	0	0
0	0	0	0	0	0	0	0	0	0	0	0	0	0	0	0	0	0	0	0	0	0	0	0	0	0	0	0	0	0	0	0	0	0	0	0	0	0	0	0	0	0	0	0	0	0	0	0	0	0
0	0	0	0	0	0	0	0	0	0	0	0	0	0	0	0	0	0	0	0	0	0	0	0	0	0	0	0	0	0	0	0	0	0	0	0	0	0	0	0	0	0	0	0	0	0	0	0	0	0
0	1	0	0	0	0	0	0	0	0	0	0	0	0	0	0	0	0	0	0	0	0	0	0	0	0	0	0	0	0	0	0	0	0	0	0	0	0	0	0	0	0	0	0	0	1	0	0	0	0
0	0	0	0	0	0	0	0	0	0	0	0	0	0	0	0	0	0	0	0	0	0	1	0	0	0	0	0	0	0	0	0	0	0	0	0	0	0	0	0	0	0	0	0	0	0	0	0	0	0
0	0	0	0	0	0	0	0	0	0	0	0	0	0	0	0	0	0	1	0	0	0	0	0	0	0	0	0	0	0	0	0	0	0	0	0	0	1	0	0	0	0	0	0	0	0	0	0	0	0
0	0	0	0	0	0	0	0	0	0	0	0	0	0	0	0	0	0	1	0	0	0	0	0	0	0	0	0	0	0	0	0	0	0	0	0	0	0	0	0	0	0	0	0	0	0	0	0	0	0
0	0	0	0	0	0	0	0	0	0	0	0	0	0	0	0	0	0	0	0	0	0	0	0	0	0	0	0	0	0	0	0	0	0	0	0	0	0	0	0	0	0	0	0	0	0	0	0	0	0
0	0	0	0	0	0	0	0	0	0	0	0	0	0	0	0	0	0	0	0	0	0	0	0	0	0	0	0	0	0	0	0	0	0	1	0	0	0	0	0	0	0	0	0	0	0	0	0	0	0
0	0	0	0	0	0	0	0	0	0	0	0	0	0	0	0	0	0	0	0	0	0	0	0	0	0	0	0	0	0	0	0	0	0	0	0	0	0	0	0	1	0	0	0	0	0	0	0	0	0
[truncated: 1,201 more columns]

## Sheet: A - Firing rate (spikes per s)
time	mean	CI_UP	CI_Down
-150	20.5502	23.6207	17.4797
-149	20.1324	23.1472	17.1176
-148	19.7052	22.6595	16.751
-147	19.3457	22.2378	16.4536
-146	18.9941	21.8424	16.1457
-145	18.7403	21.5457	15.9348
-144	18.5087	21.2843	15.7332
-143	18.3235	21.0857	15.5613
-142	18.2205	20.9963	15.4447
-141	18.1759	20.9844	15.3674
-140	18.189	21.0446	15.3333
-139	18.2768	21.1943	15.3594
-138	18.4567	21.4378	15.4756
-137	18.6386	21.6867	15.5906
-136	18.832	21.941	15.7231
-135	19.1029	22.2672	15.9385
-134	19.4258	22.6286	16.2229
-133	19.7475	22.9755	16.5194
-132	20.1115	23.3472	16.8759
-131	20.4596	23.6843	17.2349
-130	20.8745	24.0756	17.6735
-129	21.2855	24.4527	18.1182
-128	21.7045	24.8298	18.5791
-127	22.109	25.1867	19.0313
-126	22.5741	25.5987	19.5495
-125	23.0154	25.9949	20.0359
-124	23.4793	26.426	20.5325
-123	23.9441	26.861	21.0272
-122	24.368	27.2642	21.4719
-121	24.7656	27.6455	21.8858
-120	25.1792	28.045	22.3135
-119	25.5695	28.4206	22.7185
-118	25.9367	28.7766	23.0967
-117	26.2711	29.1	23.4422
-116	26.5833	29.4004	23.7662
-115	26.8413	29.6386	24.044
-114	27.0768	29.8574	24.2962
-113	27.2695	30.0252	24.5139
-112	27.4002	30.1329	24.6674
-111	27.4837	30.1931	24.7743
-110	27.5208	30.2078	24.8339
-109	27.5132	30.1802	24.8462
-108	27.4823	30.1366	24.8279
-107	27.3821	30.0295	24.7348
-106	27.2831	29.9257	24.6404
-105	27.1342	29.7794	24.4891
-104	26.9427	29.5995	24.2859
-103	26.7141	29.3904	24.0377
-102	26.4675	29.1625	23.7724
-101	26.2911	29.0106	23.5716
-100	26.0623	28.8136	23.311
-99	25.8139	28.5985	23.0294
-98	25.5145	28.3271	22.7019
-97	25.214	28.055	22.373
-96	24.9144	27.7786	22.0502
-95	24.5845	27.4697	21.6994
-94	24.2813	27.1844	21.3782
-93	23.9266	26.8474	21.0057
-92	23.5722	26.502	20.6423
-91	23.2359	26.1771	20.2947
-90	22.8929	25.8551	19.9307
-89	22.5814	25.5541	19.6087
-88	22.2717	25.2614	19.282
-87	22.002	25.0025	19.0015
-86	21.7222	24.737	18.7073
-85	21.4873	24.5151	18.4595
-84	21.2985	24.3449	18.2521
-83	21.1817	24.2382	18.1252
-82	21.0853	24.1574	18.0133
-81	21.0048	24.0882	17.9214
-80	20.9382	24.0377	17.8386
-79	20.8861	23.9915	17.7808
-78	20.9118	24.0312	17.7925
-77	20.973	24.1069	17.8392
-76	21.0189	24.1675	17.8702
-75	21.0603	24.22	17.9006
-74	21.167	24.3223	18.0118
-73	21.2502	24.3991	18.1013
-72	21.3927	24.5313	18.254
-71	21.4798	24.6022	18.3574
-70	21.6354	24.7253	18.5456
-69	21.776	24.8281	18.724
-68	21.9304	24.9382	18.9225
-67	22.0587	25.016	19.1013
-66	22.2511	25.1545	19.3478
-65	22.4571	25.3066	19.6077
-64	22.7132	25.5129	19.9135
-63	23.0164	25.773	20.2599
-62	23.3684	26.0957	20.6412
-61	23.7552	26.4575	21.0529
-60	24.1805	26.87	21.4909
-59	24.6259	27.3155	21.9364
-58	25.0948	27.7902	22.3994
-57	25.5586	28.2729	22.8443
-56	26.0253	28.7634	23.2872
-55	26.4815	29.2458	23.7172
-54	26.913	29.7152	24.1108
-53	27.3197	30.1555	24.4839
-52	27.6682	30.5374	24.799
-51	27.9653	30.8686	25.062
-50	28.2053	31.1253	25.2852
-49	28.3513	31.2952	25.4075
-48	28.4323	31.3808	25.4837
-47	28.432	31.3906	25.4734
-46	28.3529	31.3034	25.4023
-45	28.1415	31.0817	25.2013
-44	27.8676	30.783	24.9522
-43	27.5062	30.3874	24.625
-42	27.0783	29.9161	24.2406
-41	26.6306	29.4233	23.8379
-40	26.1532	28.9054	23.4009
-39	25.6767	28.3829	22.9704
-38	25.1982	27.8616	22.5347
-37	24.7188	27.3429	22.0947
-36	24.3457	26.9414	21.75
-35	23.9422	26.5212	21.3631
-34	23.6494	26.223	21.0758
-33	23.4021	25.9855	20.8188
-32	23.2195	25.8266	20.6124
-31	23.0873	25.7359	20.4388
-30	23.0561	25.7514	20.3608
-29	23.0519	25.8055	20.2984
-28	23.1339	25.9562	20.3116
-27	23.2378	26.1311	20.3445
-26	23.4246	26.3932	20.4561
-25	23.5657	26.6087	20.5226
-24	23.7195	26.8224	20.6167
-23	23.8914	27.0452	20.7377
-22	24.0448	27.2428	20.8468
-21	24.1846	27.4015	20.9677
-20	24.2501	27.472	21.0282
-19	24.2697	27.4763	21.063
-18	24.2448	27.4223	21.0673
-17	24.2344	27.3649	21.104
-16	24.1513	27.2186	21.084
-15	24.0021	26.994	21.0101
-14	23.8626	26.7752	20.95
-13	23.6545	26.4806	20.8283
-12	23.5091	26.2632	20.755
-11	23.3211	26.0245	20.6178
-10	23.2035	25.8532	20.5538
-9	23.089	25.7047	20.4733
-8	23.0211	25.6239	20.4183
-7	22.9731	25.582	20.3641
-6	22.9635	25.5979	20.3291
-5	23.0133	25.6845	20.342
-4	23.127	25.8518	20.4022
-3	23.2538	26.0429	20.4647
-2	23.4225	26.2947	20.5503
-1	23.6307	26.5861	20.6754
0	23.8506	26.886	20.8153
1	24.0969	27.2127	20.9811
2	24.3805	27.5714	21.1895
3	24.6259	27.8861	21.3657
4	24.8548	28.1757	21.5338
5	25.0596	28.4313	21.6879
6	25.254	28.6609	21.8471
7	25.3996	28.8329	21.9662
8	25.4929	28.9374	22.0485
9	25.5357	28.9854	22.0861
10	25.5446	28.9929	22.0963
11	25.5376	28.9694	22.1058
12	25.466	28.8655	22.0666
13	25.3784	28.7427	22.014
14	25.305	28.6301	21.9799
15	25.1763	28.4648	21.8878
16	25.0296	28.2784	21.7808
17	24.8188	28.0338	21.6038
18	24.5932	27.7811	21.4054
19	24.3535	27.5225	21.1845
20	24.1058	27.2648	20.9467
21	23.7979	26.9478	20.6479
22	23.4986	26.635	20.3621
23	23.0967	26.2242	19.9692
24	22.7224	25.8411	19.6038
25	22.3228	25.4233	19.2223
26	21.9002	24.9847	18.8158
27	21.5126	24.564	18.4612
28	21.0845	24.0985	18.0706
29	20.6582	23.6283	17.6881
30	20.3021	23.2386	17.3656
31	19.9667	22.8509	17.0825
32	19.6821	22.5043	16.8598
33	19.3957	22.1578	16.6336
34	19.1993	21.9031	16.4954
35	19.0673	21.7276	16.4069
36	19.1113	21.7238	16.4988
37	19.2249	21.8045	16.6453
38	19.4846	22.0503	16.9188
39	19.9419	22.4834	17.4005
40	20.5021	23.039	17.9651
41	21.222	23.7674	18.6766
42	22.082	24.6475	19.5166
43	23.146	25.723	20.5689
44	24.3732	26.9738	21.7727
45	25.8587	28.4792	23.2382
46	27.5228	30.1632	24.8825
47	29.2887	31.9631	26.6143
48	31.1705	33.8956	28.4455
49	33.163	35.9485	30.3774
50	35.3557	38.2083	32.5031
51	37.5809	40.5276	34.6343
52	39.8762	42.9434	36.809
53	42.2333	45.4388	39.0278
54	44.6191	47.9804	41.2579
55	47.0599	50.5788	43.541
56	49.4461	53.1277	45.7645
57	51.8135	55.6608	47.9662
58	54.1712	58.1815	50.1609
59	56.4086	60.5618	52.2554
60	58.581	62.8631	54.299
61	60.615	65.0006	56.2293
62	62.5448	67.0057	58.0839
63	64.3338	68.8481	59.8195
64	65.972	70.5024	61.4415
65	67.4161	71.9393	62.8929
66	68.7058	73.1999	64.2117
67	69.834	74.2779	65.3901
68	70.8008	75.1865	66.4152
69	71.6092	75.9174	67.3011
70	72.1907	76.403	67.9783
71	72.5878	76.701	68.4747
72	72.8349	76.8437	68.826
73	72.871	76.7696	68.9724
74	72.8074	76.6237	68.9912
75	72.5548	76.2803	68.8292
76	72.1317	75.7757	68.4877
77	71.5576	75.1438	67.9713
78	70.8286	74.3587	67.2985
79	69.9414	73.4286	66.4542
80	69.0099	72.4586	65.5613
81	67.972	71.3839	64.5601
82	66.8791	70.2567	63.5016
83	65.7261	69.0644	62.3877
84	64.5579	67.8537	61.262
85	63.3821	66.6357	60.1285
86	62.1129	65.3233	58.9025
87	60.9184	64.081	57.7558
88	59.728	62.8367	56.6194
89	58.6008	61.6332	55.5684
90	57.5204	60.5029	54.538
91	56.5401	59.4811	53.599
92	55.6821	58.5815	52.7828
93	54.9488	57.8134	52.0843
94	54.2719	57.118	51.4258
95	53.6808	56.5084	50.8532
96	53.2247	56.064	50.3854
97	52.8183	55.679	49.9575
98	52.4943	55.3958	49.5927
99	52.2926	55.2208	49.3643
100	52.1064	55.0794	49.1334
101	51.9336	54.9418	48.9254
102	51.8239	54.8784	48.7694
103	51.6972	54.8025	48.5919
104	51.4581	54.6049	48.3112
105	51.2125	54.394	48.0311
106	50.9519	54.1827	47.7211
107	50.648	53.9355	47.3605
108	50.2678	53.6167	46.919
109	49.7284	53.1417	46.315
110	49.1862	52.6731	45.6993
111	48.5508	52.1088	44.9927
112	47.8084	51.4363	44.1804
113	46.9717	50.6721	43.2714
114	46.0052	49.7836	42.2268
115	45.048	48.8799	41.2161
116	44.0385	47.9254	40.1516
117	42.9504	46.8885	39.0124
118	41.9269	45.8969	37.9569
119	40.8354	44.8217	36.849
120	39.741	43.7298	35.7522
121	38.6877	42.669	34.7064
122	37.631	41.597	33.6651
123	36.632	40.5842	32.6799
124	35.6438	39.5614	31.7262
125	34.6802	38.5544	30.806
126	33.7884	37.6033	29.9735
127	32.8931	36.6475	29.1387
128	32.0285	35.7174	28.3396
129	31.2223	34.8432	27.6014
130	30.4838	34.028	26.9396
131	29.7309	33.2045	26.2573
132	29.0309	32.4238	25.6381
133	28.3591	31.6624	25.0558
134	27.7394	30.9618	24.517
135	27.1769	30.3328	24.021
136	26.6882	29.7912	23.5852
137	26.2086	29.2504	23.1668
138	25.7843	28.7716	22.797
139	25.408	28.3467	22.4693
140	25.0374	27.9205	22.1542
141	24.7344	27.5773	21.8914
142	24.4975	27.31	21.685
143	24.2617	27.0534	21.47
144	24.0905	26.8818	21.2993
145	24.0234	26.8176	21.2292
146	23.9505	26.755	21.146
147	23.956	26.7904	21.1216
148	23.9592	26.8322	21.0861
149	24.0046	26.9238	21.0853
150	24.0835	27.067	21.1
151	24.1243	27.1729	21.0757
152	24.1899	27.2959	21.084
153	24.276	27.4474	21.1045
154	24.3305	27.5687	21.0924
155	24.4038	27.6977	21.1099
156	24.509	27.855	21.163
157	24.5445	27.9335	21.1555
158	24.5974	28.0194	21.1755
159	24.6686	28.1158	21.2214
160	24.7561	28.2281	21.2841
161	24.8157	28.2978	21.3335
162	24.8901	28.387	21.3933
163	25.0126	28.5204	21.5048
164	25.135	28.6645	21.6055
165	25.2766	28.821	21.7323
166	25.4559	29.0223	21.8894
167	25.6616	29.2494	22.0738
168	25.8963	29.5109	22.2817
169	26.1312	29.7773	22.4851
170	26.398	30.0865	22.7096
171	26.7073	30.4452	22.9694
172	27.0399	30.8286	23.2512
173	27.425	31.2552	23.5947
174	27.824	31.7001	23.9479
175	28.1982	32.1237	24.2727
176	28.555	32.5233	24.5866
177	28.9007	32.8944	24.9071
178	29.2815	33.3127	25.2503
179	29.6242	33.6816	25.5668
180	29.9047	33.9755	25.8339
181	30.1864	34.2644	26.1084
182	30.4029	34.474	26.3318
183	30.62	34.6735	26.5665
184	30.7989	34.8296	26.7682
185	30.8969	34.9123	26.8816
186	30.9825	34.9579	27.0071
187	31.0324	34.961	27.1037
188	31.0633	34.9418	27.1847
189	31.0438	34.8706	27.217
190	31.0301	34.8028	27.2575
191	30.9914	34.7052	27.2776
192	30.9013	34.5621	27.2406
193	30.8145	34.4249	27.2042
194	30.7271	34.287	27.1672
195	30.5914	34.1044	27.0785
196	30.4556	33.9301	26.9811
197	30.3735	33.8197	26.9273
198	30.2412	33.6549	26.8276
199	30.1245	33.5129	26.7361
200	29.9822	33.3438	26.6206
201	29.7974	33.1371	26.4577
202	29.6204	32.9351	26.3058
203	29.4343	32.7256	26.143
204	29.2277	32.5018	25.9535
205	29.0576	32.314	25.8012
206	28.866	32.1063	25.6257
207	28.6965	31.9204	25.4726
208	28.5686	31.7912	25.346
209	28.454	31.6613	25.2467
210	28.4465	31.6587	25.2342
211	28.412	31.629	25.195
212	28.4378	31.6613	25.2142
213	28.5517	31.7713	25.3321
214	28.6689	31.8931	25.4446
215	28.8572	32.0841	25.6303
216	29.095	32.3259	25.8642
217	29.3736	32.6094	26.1379
218	29.6726	32.9023	26.4429
219	30.0578	33.2846	26.831
220	30.4197	33.6352	27.2042
221	30.7927	33.9854	27.6
222	31.1663	34.325	28.0077
223	31.53	34.6415	28.4184
224	31.9079	34.9732	28.8427
225	32.2437	35.2536	29.2338
226	32.5299	35.4776	29.5822
227	32.7738	35.6614	29.8862
228	33.0088	35.8408	30.1768
229	33.1979	35.9752	30.4206
230	33.34	36.0696	30.6104
231	33.4206	36.1251	30.7161
232	33.4198	36.1122	30.7274
233	33.3904	36.0929	30.6879
234	33.3527	36.0759	30.6294
235	33.2708	36.0158	30.5258
236	33.1242	35.904	30.3443
237	32.9009	35.7133	30.0885
238	32.656	35.5041	29.8078
239	32.3864	35.2679	29.5049
240	32.0609	34.9671	29.1548
241	31.7016	34.6286	28.7746
242	31.3107	34.2455	28.376
243	30.9305	33.8661	27.9949
244	30.5369	33.4728	27.601
245	30.1508	33.0846	27.217
246	29.7603	32.6933	26.8272
247	29.3337	32.2732	26.3942
248	28.9258	31.8833	25.9683
249	28.4933	31.4806	25.5061
250	28.0937	31.1316	25.0558
251	27.6962	30.7849	24.6075
252	27.3176	30.4667	24.1684
253	26.9786	30.2075	23.7496
254	26.6464	29.9595	23.3332
255	26.4096	29.8066	23.0126
256	26.0898	29.5729	22.6068
257	25.8208	29.3821	22.2596
258	25.5942	29.2296	21.9589
259	25.4424	29.1496	21.7352
260	25.2928	29.0531	21.5325
261	25.1551	28.9604	21.3497
262	25.0484	28.8891	21.2077
263	24.9384	28.8114	21.0653
264	24.8629	28.7635	20.9623
265	24.7721	28.6964	20.8479
266	24.6923	28.6501	20.7345
267	24.6594	28.6494	20.6695
268	24.6428	28.676	20.6095
269	24.5919	28.6667	20.5171
270	24.5813	28.6999	20.4626
271	24.5693	28.7289	20.4097
272	24.5297	28.7339	20.3254
273	24.5226	28.7585	20.2866
274	24.4729	28.7337	20.212
275	24.4862	28.7659	20.2065
276	24.4615	28.7463	20.1768
277	24.4292	28.7109	20.1475
278	24.361	28.62	20.102
279	24.3256	28.5612	20.0901
280	24.281	28.485	20.077
281	24.2495	28.4254	20.0737
282	24.24	28.3808	20.0991
283	24.2079	28.3047	20.1111
284	24.1901	28.259	20.1213
285	24.2036	28.2458	20.1614
286	24.2311	28.259	20.2032
287	24.2453	28.2648	20.2257
288	24.2994	28.3259	20.2728
289	24.3387	28.3864	20.2911
290	24.4292	28.5001	20.3582
291	24.5297	28.6284	20.4311
292	24.6385	28.7672	20.5098
293	24.7433	28.8954	20.5911
294	24.875	29.0566	20.6933
295	25.0263	29.2249	20.8277
296	25.1569	29.3661	20.9477
297	25.2793	29.4888	21.0698
298	25.3912	29.5896	21.1928
299	25.5102	29.6884	21.3319
300	25.6204	29.7681	21.4726
301	25.7012	29.8073	21.595
302	25.7358	29.7931	21.6785
303	25.8188	29.8301	21.8075
304	25.8463	29.7938	21.8988
305	25.899	29.7946	22.0035
306	25.937	29.7801	22.0939
307	25.9549	29.7492	22.1605
308	25.9523	29.7054	22.1992
309	25.9487	29.6747	22.2228
310	25.9304	29.6312	22.2296
311	25.8938	29.5712	22.2164
312	25.8061	29.467	22.1453
313	25.7562	29.3948	22.1176
314	25.6149	29.2426	21.9872
315	25.5144	29.1245	21.9042
316	25.3983	28.9887	21.808
317	25.3297	28.8955	21.7639
318	25.2226	28.7622	21.683
319	25.126	28.6416	21.6104
320	25.0745	28.5667	21.5823
321	24.9915	28.462	21.521
322	24.984	28.4408	21.5272
323	24.96	28.407	21.513
324	25.0056	28.4517	21.5596
325	25.0657	28.521	21.6104
326	25.1269	28.6037	21.6501
327	25.2663	28.7548	21.7778
328	25.4488	28.977	21.9206
329	25.6631	29.2332	22.0929
330	25.9065	29.5208	22.2922
331	26.1804	29.8373	22.5234
332	26.4951	30.1916	22.7987
333	26.8072	30.5377	23.0767
334	27.1157	30.8839	23.3474
335	27.4328	31.2204	23.6452
336	27.7805	31.5822	23.9788
337	28.0844	31.8926	24.2762
338	28.4058	32.205	24.6066
339	28.7447	32.5358	24.9537
340	28.9954	32.7593	25.2314
341	29.2006	32.9482	25.4529
342	29.4077	33.1271	25.6883
343	29.5983	33.2958	25.9009
344	29.7365	33.4165	26.0565
345	29.8158	33.4735	26.1581
346	29.869	33.5073	26.2306
347	29.8618	33.4872	26.2364
348	29.8438	33.4537	26.234
349	29.7692	33.358	26.1803
350	29.6556	33.2312	26.0799
351	29.5069	33.0664	25.9474
352	29.3325	32.8816	25.7834
353	29.1373	32.6668	25.6077
354	28.907	32.4177	25.3964
355	28.6954	32.1783	25.2124
356	28.4546	31.9064	25.0028
357	28.2043	31.6213	24.7873
358	27.9733	31.3394	24.6073
359	27.7169	31.0381	24.3957
360	27.5006	30.7805	24.2207
361	27.2927	30.5338	24.0517
362	27.0511	30.2562	23.8459
363	26.9167	30.0865	23.7469
364	26.7355	29.8824	23.5886
365	26.5849	29.7103	23.4594
366	26.4248	29.5377	23.3119
367	26.2877	29.3926	23.1829
368	26.1429	29.2449	23.0409
369	26.0275	29.1358	22.9192
370	25.9806	29.104	22.8573
371	25.8977	29.0331	22.7622
372	25.8291	28.988	22.6701
373	25.8163	28.9825	22.6501
374	25.7852	28.9637	22.6067
375	25.7684	28.9566	22.5802
376	25.7243	28.9213	22.5274
377	25.7462	28.9409	22.5514
378	25.8107	29.0046	22.6168
379	25.8661	29.0514	22.6808
380	25.9806	29.1561	22.805
381	26.1052	29.257	22.9534
382	26.2578	29.3902	23.1254
383	26.4497	29.567	23.3325
384	26.6974	29.7898	23.6051
385	26.9445	30.0132	23.8758
386	27.1715	30.2277	24.1154
387	27.4249	30.4661	24.3837
388	27.6924	30.7241	24.6606
389	27.9131	30.9391	24.8871
390	28.172	31.2005	25.1435
391	28.3803	31.4144	25.3462
392	28.5762	31.6286	25.5238
393	28.7212	31.7826	25.6598
394	28.8264	31.9058	25.7469
395	28.8894	31.9811	25.7977
396	28.9098	32.0149	25.8047
397	28.8689	31.9877	25.75
398	28.7582	31.8769	25.6395
399	28.6822	31.799	25.5654
400	28.5737	31.6786	25.4688
401	28.406	31.4973	25.3147
402	28.2445	31.3212	25.1677
403	28.0817	31.1463	25.017
404	27.9151	30.9682	24.862
405	27.7711	30.8252	24.717
406	27.6221	30.6817	24.5624
407	27.4868	30.5624	24.4112
408	27.353	30.4569	24.2491
409	27.2894	30.447	24.1317
410	27.2137	30.4256	24.0018
411	27.1784	30.4506	23.9063
412	27.1473	30.4937	23.8009
413	27.1466	30.5653	23.7279
414	27.1193	30.6093	23.6293
415	27.1296	30.6842	23.575
416	27.1208	30.7375	23.5041
417	27.1146	30.7977	23.4316
418	27.1091	30.8439	23.3744
419	27.0786	30.8577	23.2994
420	27.0614	30.8833	23.2395
421	27.0437	30.8963	23.1912
422	26.9981	30.9003	23.0959
423	26.9741	30.9134	23.0348
424	26.9636	30.9453	22.9819
425	26.9694	30.9994	22.9395
426	26.9603	31.0416	22.8791
427	26.9373	31.0707	22.8039
428	26.9185	31.1062	22.7308
429	26.9164	31.1563	22.6765
430	26.9423	31.2387	22.6459
431	26.9291	31.272	22.5861
432	26.9299	31.3195	22.5403
433	26.9539	31.3724	22.5355
434	26.9583	31.3901	22.5265
435	26.9197	31.3534	22.486
436	26.8334	31.2522	22.4146
437	26.7284	31.1184	22.3383
438	26.5811	30.9267	22.2356
439	26.4088	30.6965	22.1211
440	26.2409	30.4695	22.0123
441	25.9929	30.1401	21.8457
442	25.6915	29.7475	21.6354
443	25.3441	29.304	21.3843
444	24.988	28.8437	21.1322
445	24.6278	28.3804	20.8752
446	24.2757	27.9194	20.632
447	23.9458	27.4771	20.4145
448	23.5897	27.0205	20.1589
449	23.1962	26.5358	19.8566
450	22.8586	26.1132	19.604
451	22.5834	25.7545	19.4122
452	22.3293	25.4322	19.2264
453	22.1123	25.1551	19.0695
454	21.9172	24.902	18.9324
455	21.8005	24.7415	18.8594
456	21.7107	24.6129	18.8084
457	21.7223	24.5853	18.8592
458	21.7396	24.5674	18.9117
459	21.8101	24.6112	19.009
460	21.966	24.7474	19.1846
461	22.1226	24.8837	19.3616
462	22.3246	25.0776	19.5717
463	22.6359	25.3917	19.8802
464	22.9626	25.7195	20.2056
465	23.3317	26.1091	20.5542
466	23.7164	26.5211	20.9117
467	24.1282	26.9688	21.2877
468	24.5294	27.4066	21.6522
469	24.9686	27.8869	22.0504
470	25.407	28.3677	22.4463
471	25.8737	28.8689	22.8785
472	26.3645	29.3968	23.3323
473	26.8567	29.9119	23.8014
474	27.3468	30.4153	24.2782
475	27.831	30.9031	24.7589
476	28.2703	31.3311	25.2095
477	28.746	31.8	25.692
478	29.1993	32.232	26.1665
479	29.5902	32.6039	26.5764
480	29.9448	32.9414	26.9481
481	30.2935	33.275	27.312
482	30.5949	33.571	27.6188
483	30.8572	33.8323	27.882
484	31.006	33.9899	28.022
485	31.1171	34.1205	28.1138
486	31.1317	34.1571	28.1063
487	31.0601	34.1094	28.0108
488	30.9144	33.9991	27.8297
489	30.7146	33.8096	27.6195
490	30.4348	33.5327	27.3369
491	30.0473	33.1415	26.9532
492	29.6134	32.7041	26.5227
493	29.1287	32.1984	26.0591
494	28.6407	31.6737	25.6077
495	28.0923	31.0858	25.0988
496	27.5285	30.4783	24.5788
497	26.9651	29.8704	24.0599
498	26.4221	29.2916	23.5526
499	25.8742	28.6998	23.0486
500	25.449	28.2483	22.6497
501	25.0599	27.8447	22.275
502	24.7495	27.5303	21.9687
503	24.5095	27.2997	21.7193
504	24.3084	27.1184	21.4984
505	24.1632	27.0027	21.3238
506	24.1318	27.0069	21.2568
507	24.1883	27.104	21.2725
508	24.2961	27.2517	21.3406
509	24.4275	27.4218	21.4333
510	24.5569	27.5823	21.5316
511	24.7447	27.804	21.6855
512	24.9403	28.0266	21.854
513	25.1279	28.2366	22.0191
514	25.3027	28.4244	22.1811
515	25.476	28.615	22.3371
516	25.578	28.7179	22.4381
517	25.6702	28.8147	22.5258
518	25.7832	28.9363	22.6301
519	25.8001	28.9532	22.647
520	25.8183	28.9628	22.6739
521	25.8205	28.9653	22.6758
522	25.7278	28.8664	22.5893
523	25.6153	28.7537	22.4769
524	25.514	28.64	22.388
525	25.3888	28.5077	22.2699
526	25.2585	28.3669	22.15
527	25.1079	28.2078	22.0079
528	24.9604	28.0501	21.8708
529	24.8251	27.9165	21.7337
530	24.652	27.7466	21.5573
531	24.4966	27.6112	21.382
532	24.3262	27.4593	21.1931
533	24.1755	27.3293	21.0218
534	24.011	27.1944	20.8275
535	23.8418	27.0614	20.6222
536	23.6523	26.9114	20.3933
537	23.46	26.7673	20.1527
538	23.3168	26.6777	19.9559
539	23.1554	26.5594	19.7514
540	22.9421	26.3815	19.5027
541	22.7436	26.2267	19.2605
542	22.5444	26.0603	19.0285
543	22.3592	25.899	18.8194
544	22.15	25.7049	18.5951
545	21.9715	25.5324	18.4107
546	21.7726	25.3296	18.2155
547	21.5253	25.0655	17.9851
548	21.3563	24.8886	17.8239
549	21.1799	24.6909	17.6688
550	21.0477	24.5432	17.5523
551	20.9152	24.3857	17.4447
552	20.7857	24.238	17.3334
553	20.6415	24.0837	17.1994
554	20.5462	23.9736	17.1189
555	20.4617	23.8763	17.0471
556	20.4086	23.8149	17.0024
557	20.3988	23.7965	17.001
558	20.3661	23.7465	16.9856
559	20.3543	23.7163	16.9924
560	20.3976	23.7309	17.0642
561	20.4484	23.7521	17.1446
562	20.5073	23.7759	17.2387
563	20.6232	23.8473	17.399
564	20.7433	23.921	17.5657
565	20.8382	23.9665	17.7099
566	20.9926	24.0701	17.9152
567	21.165	24.2098	18.1201
568	21.367	24.3858	18.3482
569	21.5762	24.5819	18.5706
570	21.7737	24.7847	18.7627
571	22.0271	25.0549	18.9992
572	22.2634	25.3187	19.208
573	22.4968	25.5934	19.4002
574	22.6867	25.8362	19.5372
575	22.8739	26.0875	19.6602
576	23.0511	26.342	19.7603
577	23.1292	26.4852	19.7732
578	23.2172	26.6386	19.7959
579	23.2762	26.7499	19.8025
580	23.2553	26.7654	19.7453
581	23.2364	26.7803	19.6924
582	23.1736	26.7369	19.6103
583	23.0532	26.6209	19.4854
584	22.8767	26.4344	19.3191
585	22.6661	26.1997	19.1325
586	22.4496	25.9479	18.9513
587	22.2084	25.6625	18.7544
588	21.9383	25.3423	18.5342
589	21.7115	25.0565	18.3664
590	21.4694	24.7493	18.1894
591	21.2882	24.5118	18.0646
592	21.1069	24.2863	17.9274
593	21.018	24.1565	17.8795
594	20.9725	24.0779	17.867
595	20.9731	24.0572	17.889
596	21.0004	24.0809	17.9198
597	21.0756	24.1683	17.9828
598	21.1783	24.2974	18.0592
599	21.3444	24.4909	18.1979
600	21.5121	24.6958	18.3284
601	21.7111	24.9322	18.4901
602	21.9177	25.186	18.6494
603	22.1381	25.457	18.8191
604	22.2965	25.6513	18.9417
605	22.4679	25.8593	19.0765
606	22.6326	26.0449	19.2203
607	22.7052	26.1367	19.2737
608	22.7655	26.2062	19.3247
609	22.7781	26.2165	19.3397
610	22.7631	26.2069	19.3194
611	22.7374	26.1673	19.3074
612	22.7007	26.1208	19.2807
613	22.66	26.0672	19.2527
614	22.5889	25.9835	19.1942
615	22.5339	25.9212	19.1465
616	22.4435	25.8226	19.0643
617	22.3999	25.7747	19.025
618	22.383	25.7538	19.0121
619	22.3475	25.7236	18.9714
620	22.3477	25.73	18.9653
621	22.3628	25.757	18.9686
622	22.43	25.8262	19.0339
623	22.4987	25.9101	19.0873
624	22.5754	25.9937	19.1572
625	22.6561	26.0769	19.2353
626	22.7367	26.164	19.3094
627	22.7936	26.2171	19.37
628	22.9162	26.3317	19.5007
629	22.9684	26.3671	19.5697
630	22.9784	26.3493	19.6074
631	22.9982	26.338	19.6585
632	22.9941	26.3036	19.6846
633	23.0162	26.2858	19.7467
634	23.0347	26.2578	19.8115
635	23.0399	26.2149	19.8648
636	23.0855	26.2173	19.9537
637	23.1437	26.2357	20.0516
638	23.1709	26.233	20.1087
639	23.2521	26.2825	20.2217
640	23.3202	26.3218	20.3185
641	23.4519	26.4427	20.4612
642	23.6114	26.6049	20.6179
643	23.7855	26.7842	20.7869
644	24.004	27.0185	20.9896
645	24.1988	27.2366	21.1609
646	24.3769	27.4427	21.3111
647	24.5783	27.6722	21.4844
648	24.7414	27.8685	21.6143
649	24.8726	28.0348	21.7105
650	25.0038	28.1987	21.8089
651	25.1015	28.3283	21.8748
652	25.1096	28.3633	21.8558
653	25.1134	28.3919	21.8349
654	25.1049	28.4104	21.7994
655	25.0302	28.3575	21.7029
656	24.8899	28.2376	21.5423
657	24.758	28.1177	21.3984
658	24.5887	27.9605	21.217
659	24.4249	27.8011	21.0486
660	24.2465	27.6278	20.8652
661	24.1412	27.521	20.7614
662	23.9973	27.372	20.6227
663	23.9146	27.2896	20.5395
664	23.8455	27.2238	20.4672
665	23.8182	27.1975	20.439
666	23.849	27.228	20.4699
667	23.9131	27.2937	20.5325
668	24.0281	27.4201	20.6361
669	24.156	27.5576	20.7544
670	24.3046	27.72	20.8891
671	24.5644	28.0001	21.1287
672	24.7447	28.2016	21.2879
673	24.9632	28.4578	21.4685
674	25.1275	28.6547	21.6002
675	25.3151	28.8822	21.748
676	25.4983	29.1069	21.8898
677	25.6174	29.2696	21.9653
678	25.7351	29.432	22.0382
679	25.78	29.5166	22.0434
680	25.8381	29.5971	22.0791
681	25.7789	29.5615	21.9963
682	25.7195	29.5202	21.9188
683	25.623	29.44	21.8059
684	25.5131	29.3433	21.683
685	25.3615	29.1953	21.5277
686	25.223	29.0546	21.3914
687	24.992	28.8159	21.1682
688	24.8431	28.6701	21.0161
689	24.6897	28.5254	20.854
690	24.5383	28.3793	20.6973
691	24.4139	28.2718	20.5561
692	24.2673	28.1393	20.3954
693	24.1145	28.0008	20.2283
694	24.0084	27.9082	20.1086
695	23.8798	27.7979	19.9616
696	23.7793	27.7078	19.8508
697	23.7041	27.6336	19.7747
698	23.6325	27.5574	19.7077
699	23.5427	27.4553	19.6301
700	23.4762	27.3521	19.6003
701	23.4026	27.2357	19.5694
702	23.3455	27.1346	19.5564
703	23.2572	26.9774	19.5369
704	23.1723	26.8283	19.5164
705	23.1019	26.6825	19.5212
706	23.0739	26.5879	19.5599
707	23.0455	26.4832	19.6078
708	23.0126	26.3729	19.6524
709	22.965	26.2539	19.6761
710	22.944	26.1685	19.7196
711	22.9806	26.1485	19.8128
712	23.0284	26.1511	19.9057
713	23.0982	26.1966	19.9997
714	23.2526	26.3282	20.177
715	23.4335	26.5068	20.3602
716	23.6405	26.7224	20.5587
717	23.872	26.9705	20.7735
718	24.1247	27.2582	20.9912
719	24.3597	27.5191	21.2003
720	24.5743	27.7868	21.3618
721	24.8615	28.1126	21.6104
722	25.1414	28.4379	21.8448
723	25.3881	28.7321	22.0442
724	25.5947	28.9823	22.2071
725	25.8472	29.2773	22.4171
726	26.0201	29.4968	22.5433
727	26.1581	29.6739	22.6423
728	26.2578	29.8181	22.6975
729	26.332	29.9354	22.7285
730	26.2724	29.923	22.6217
731	26.2611	29.9478	22.5745
732	26.2065	29.9237	22.4894
733	26.1118	29.8641	22.3595
734	25.9808	29.7713	22.1903
735	25.8429	29.6557	22.0301
736	25.6648	29.5047	21.825
737	25.4467	29.3036	21.5898
738	25.2269	29.1028	21.351
739	24.9802	28.8652	21.0953
740	24.7441	28.6285	20.8598
741	24.517	28.3923	20.6417
742	24.3276	28.1765	20.4787
743	24.0783	27.8869	20.2697
744	23.8684	27.6231	20.1136
745	23.6907	27.394	19.9875
746	23.5346	27.1645	19.9047
747	23.3846	26.9314	19.8377
748	23.2638	26.7129	19.8148
749	23.1369	26.4997	19.7741
750	23.0207	26.2888	19.7525
751	23.0052	26.1866	19.8237
752	22.9884	26.0913	19.8855
753	22.9892	26.0269	19.9514
754	23.0449	26.0249	20.0649
755	23.1444	26.0863	20.2024
756	23.2758	26.1864	20.3651
757	23.4945	26.3872	20.6017
758	23.7686	26.664	20.8732
759	24.0702	26.9782	21.1622
760	24.4514	27.3707	21.5321
761	24.8654	27.8087	21.9222
762	25.3219	28.296	22.3478
763	25.8281	28.833	22.8232
764	26.356	29.3923	23.3197
765	26.9105	29.9664	23.8545
766	27.4652	30.5497	24.3807
767	28.0264	31.1361	24.9167
768	28.5811	31.7137	25.4485
769	29.0829	32.2316	25.9342
770	29.5532	32.7157	26.3906
771	29.9316	33.1006	26.7626
772	30.2604	33.4353	27.0856
773	30.4961	33.6777	27.3145
774	30.6652	33.8484	27.4819
775	30.7489	33.9374	27.5604
776	30.726	33.9152	27.5368
777	30.6112	33.8093	27.4131
778	30.4215	33.6242	27.2187
779	30.1424	33.3517	26.933
780	29.8253	33.0464	26.6043
781	29.4173	32.6444	26.1901
782	29.012	32.2467	25.7774
783	28.5553	31.7886	25.322
784	27.9922	31.2247	24.7597
785	27.4641	30.6886	24.2396
786	26.9088	30.1197	23.6979
787	26.3904	29.5769	23.2038
788	25.8513	29.0115	22.6912
789	25.349	28.4734	22.2246
790	24.8913	27.9807	21.802
791	24.437	27.4815	21.3925
792	24.0395	27.0439	21.0352
793	23.6683	26.6389	20.6977
794	23.3295	26.2687	20.3902
795	23.1304	26.05	20.2108
796	22.9514	25.8548	20.0481
797	22.8024	25.7025	19.9022
798	22.6805	25.5868	19.7742
799	22.6148	25.5432	19.6864
800	22.565	25.53	19.6
801	22.533	25.5376	19.5284
802	22.558	25.6107	19.5054
803	22.6122	25.7079	19.5164
804	22.6491	25.7955	19.5027
805	22.6945	25.8956	19.4933
806	22.7156	25.9692	19.4621
807	22.739	26.0433	19.4347
808	22.7938	26.1497	19.438
809	22.8654	26.2534	19.4773
810	22.8399	26.2461	19.4336
811	22.8118	26.2267	19.3968
812	22.7801	26.1879	19.3722
813	22.7171	26.1095	19.3247
814	22.6299	25.9991	19.2607
815	22.5599	25.8952	19.2245
816	22.4862	25.7862	19.1862
817	22.4365	25.6975	19.1755
818	22.4581	25.677	19.2393
819	22.4918	25.6764	19.3072
820	22.5831	25.7361	19.4301
821	22.7178	25.8482	19.5873
822	22.8987	26.0169	19.7805
823	23.126	26.2426	20.0094
824	23.3522	26.4704	20.234
825	23.6914	26.8312	20.5515
826	24.0426	27.2086	20.8767
827	24.3953	27.59	21.2006
828	24.7896	28.0182	21.561
829	25.1832	28.4359	21.9304
830	25.5823	28.8566	22.308
831	25.9008	29.1902	22.6114
832	26.1877	29.4838	22.8916
833	26.4158	29.7141	23.1175
834	26.5594	29.8428	23.2761
835	26.6784	29.9342	23.4226
836	26.6811	29.8964	23.4657
837	26.5947	29.7587	23.4306
838	26.4398	29.5458	23.3339
839	26.1823	29.2073	23.1574
840	25.9222	28.8857	22.9588
841	25.5294	28.4288	22.63
842	25.1123	27.9424	22.2823
843	24.6936	27.4545	21.9327
844	24.2895	26.9852	21.5937
845	23.8695	26.5095	21.2295
846	23.431	26.0275	20.8345
847	23.0568	25.615	20.4986
848	22.7265	25.2575	20.1956
849	22.4377	24.9563	19.919
850	22.2333	24.7594	19.7073
851	22.0811	24.6233	19.539
852	22.0186	24.5874	19.4498
853	22.0125	24.6158	19.4091
854	22.0899	24.7396	19.4401
855	22.2511	24.9424	19.5598
856	22.4751	25.211	19.7391
857	22.7488	25.5284	19.9692
858	23.0628	25.8828	20.2428
859	23.4063	26.2617	20.5508
860	23.7727	26.6601	20.8853
861	24.1702	27.0823	21.2581
862	24.5591	27.4749	21.6432
863	24.9141	27.831	21.9971
864	25.3273	28.2384	22.4163
865	25.705	28.607	22.8029
866	26.0174	28.9149	23.1199
867	26.2984	29.1791	23.4177
868	26.4993	29.3691	23.6296
869	26.7523	29.6141	23.8905
870	26.9455	29.8011	24.0899
871	27.0955	29.95	24.241
872	27.2249	30.0791	24.3706
873	27.2989	30.1583	24.4395
874	27.3958	30.2675	24.5242
875	27.4255	30.3129	24.538
876	27.4572	30.3612	24.5532
877	27.4138	30.337	24.4906
878	27.4553	30.3994	24.5112
879	27.4612	30.4224	24.5
880	27.4661	30.4455	24.4866
881	27.474	30.4736	24.4743
882	27.5274	30.5471	24.5078
883	27.5814	30.6292	24.5337
884	27.6184	30.6962	24.5405
885	27.7059	30.8332	24.5787
886	27.8095	30.9885	24.6305
887	27.9132	31.1488	24.6777
888	28.0389	31.3353	24.7425
889	28.1485	31.5099	24.7871
890	28.2948	31.7228	24.8668
891	28.4341	31.9285	24.9396
892	28.5665	32.1193	25.0137
893	28.7268	32.3326	25.1209
894	28.8089	32.4632	25.1545
895	28.9047	32.5941	25.2152
896	28.9706	32.6836	25.2577
897	28.9882	32.716	25.2605
898	28.958	32.6771	25.2388
899	28.8995	32.6048	25.1943
900	28.8781	32.5569	25.1993
901	28.8019	32.4365	25.1672
902	28.6674	32.2513	25.0835
903	28.5202	32.0268	25.0136
904	28.3538	31.7876	24.92
905	28.1425	31.4983	24.7867
906	27.8852	31.1563	24.6141
907	27.6441	30.837	24.4513
908	27.3561	30.4587	24.2536
909	27.0945	30.1039	24.0851
910	26.8317	29.7503	23.913
911	26.5355	29.3667	23.7043
912	26.2603	29.0002	23.5203
913	25.9677	28.626	23.3093
914	25.7155	28.2808	23.1501
915	25.518	28.0058	23.0302
916	25.3273	27.7427	22.9119
917	25.1622	27.5141	22.8103
918	25.0256	27.3263	22.7249
919	24.9039	27.1685	22.6394
920	24.8551	27.1123	22.5978
921	24.8345	27.1004	22.5685
922	24.8693	27.1672	22.5713
923	24.888	27.245	22.531
924	24.9528	27.3896	22.5159
925	25.0467	27.5741	22.5192
926	25.1483	27.7713	22.5253
927	25.2701	27.996	22.5442
928	25.3563	28.1913	22.5213
929	25.4874	28.4238	22.551
930	25.5506	28.5788	22.5225
931	25.5886	28.7067	22.4706
932	25.6107	28.8012	22.4201
933	25.5496	28.8034	22.2958
934	25.5091	28.8012	22.217
935	25.4156	28.7437	22.0875
936	25.3195	28.6771	21.9618
937	25.1613	28.5469	21.7756
938	24.9939	28.3919	21.5959
939	24.7981	28.2065	21.3896
940	24.619	28.0365	21.2016
941	24.3861	27.8161	20.9562
942	24.1927	27.6318	20.7536
943	24.0059	27.4585	20.5532
944	23.7922	27.2607	20.3238
945	23.6485	27.1372	20.1598
946	23.4766	26.9858	19.9674
947	23.3273	26.8552	19.7993
948	23.2158	26.7641	19.6675
949	23.1185	26.6822	19.5549
950	23.0555	26.6311	19.48
951	23.0379	26.6038	19.472
952	22.984	26.5461	19.4218
953	22.9852	26.5248	19.4457
954	23.0024	26.5088	19.496
955	23.0355	26.4988	19.5723
956	23.0844	26.4956	19.6732
957	23.1486	26.5008	19.7964
958	23.2319	26.5205	19.9432
959	23.3032	26.531	20.0754
960	23.467	26.6338	20.3002
961	23.6543	26.7543	20.5544
962	23.7763	26.8225	20.7302
963	23.9695	26.9788	20.9602
964	24.171	27.1398	21.2022
965	24.3867	27.3256	21.4478
966	24.5887	27.5011	21.6764
967	24.7872	27.6806	21.8937
968	24.9379	27.8113	22.0645
969	25.0885	27.9473	22.2297
970	25.229	28.0696	22.3884
971	25.3364	28.1541	22.5187
972	25.3936	28.1796	22.6075
973	25.4521	28.2067	22.6975
974	25.4635	28.1799	22.7471
975	25.4433	28.1162	22.7704
976	25.408	28.0377	22.7784
977	25.3663	27.9459	22.7867
978	25.2891	27.83	22.7481
979	25.1663	27.6717	22.6609
980	25.04	27.5225	22.5574
981	24.9672	27.4584	22.476
982	24.8657	27.3784	22.3531
983	24.7839	27.3311	22.2367
984	24.7068	27.3038	22.1099
985	24.6437	27.3111	21.9764
986	24.5838	27.3112	21.8565
987	24.5644	27.3601	21.7686
988	24.5402	27.3999	21.6804
989	24.5774	27.4873	21.6676
990	24.6414	27.5806	21.7022
991	24.737	27.6984	21.7756
992	24.8693	27.8358	21.9029
993	25.0287	27.9913	22.0661
994	25.2336	28.1723	22.2948
995	25.4674	28.3702	22.5645
996	25.7509	28.6245	22.8772
997	26.0986	28.9439	23.2533
998	26.5296	29.355	23.7043
999	26.9451	29.7672	24.1231
1000	27.4218	30.2616	24.582
1001	27.9168	30.7964	25.0372
1002	28.4727	31.4066	25.5388
1003	29.0385	32.052	26.0251
1004	29.5514	32.6638	26.4391
1005	30.136	33.351	26.921
1006	30.6554	33.9698	27.3409
1007	31.1431	34.5627	27.7235
1008	31.5451	35.0623	28.0279
1009	31.8866	35.4912	28.282
1010	32.1169	35.7857	28.4481
1011	32.2894	36.0175	28.5613
1012	32.3548	36.1213	28.5883
1013	32.312	36.103	28.5209
1014	32.1831	35.9805	28.3856
1015	31.9214	35.7071	28.1356
1016	31.5649	35.3225	27.8074
1017	31.1106	34.824	27.3972
1018	30.6455	34.3055	26.9855
1019	30.0554	33.6539	26.4569
1020	29.4583	32.9846	25.932
1021	28.8804	32.3272	25.4336
1022	28.2908	31.6458	24.9358
1023	27.7402	31.0194	24.4611
1024	27.2243	30.4284	24.0202
1025	26.7262	29.8707	23.5817
1026	26.3568	29.4582	23.2554
1027	26.0164	29.08	22.9527
1028	25.7372	28.7769	22.6975
1029	25.5579	28.5787	22.5371
1030	25.4072	28.426	22.3884
1031	25.327	28.3517	22.3024
1032	25.2793	28.3062	22.2523
1033	25.2522	28.2893	22.2151
1034	25.3014	28.347	22.2557
1035	25.3128	28.3625	22.2632
1036	25.3475	28.4123	22.2827
1037	25.38	28.4311	22.329
1038	25.377	28.4045	22.3495
1039	25.3656	28.3608	22.3704
1040	25.2974	28.2501	22.3447
1041	25.2581	28.1416	22.3746
1042	25.1568	27.979	22.3346
1043	25.0262	27.7775	22.2749
1044	24.8563	27.5451	22.1675
1045	24.6866	27.3093	22.064
1046	24.4896	27.0475	21.9317
1047	24.3455	26.8612	21.8298
1048	24.175	26.6654	21.6846
1049	24.0341	26.5279	21.5402
1050	23.8944	26.4049	21.3839
1051	23.7943	26.338	21.2507
1052	23.722	26.319	21.125
1053	23.7528	26.4223	21.0833
1054	23.7484	26.4942	21.0025
1055	23.7857	26.6059	20.9656
1056	23.8283	26.725	20.9316
1057	23.8766	26.8543	20.8988
1058	23.9983	27.0322	20.9644
1059	24.097	27.1759	21.0181
1060	24.217	27.3287	21.1052
1061	24.3055	27.4349	21.1761
1062	24.4068	27.5315	21.2821
1063	24.5177	27.6156	21.4198
1064	24.5929	27.6389	21.5469
1065	24.6847	27.6669	21.7025
1066	24.7538	27.6671	21.8404
1067	24.8694	27.702	22.0367
1068	24.9174	27.656	22.1787
1069	24.9668	27.6108	22.3228
1070	25.0324	27.5819	22.4829
1071	25.1347	27.601	22.6685
1072	25.2275	27.6185	22.8365
1073	25.3116	27.6559	22.9674
1074	25.4158	27.7289	23.1027
1075	25.5342	27.8341	23.2343
1076	25.6713	27.9857	23.3569
1077	25.7429	28.0851	23.4008
1078	25.8421	28.2337	23.4504
1079	25.9253	28.3769	23.4738
1080	26.0084	28.523	23.4939
1081	26.0589	28.6428	23.4751
1082	26.1078	28.7605	23.4551
1083	26.0989	28.8143	23.3835
1084	26.1579	28.9285	23.3873
1085	26.1013	28.935	23.2676
1086	26.0758	28.9644	23.1873
1087	26.09	29.0251	23.1548
1088	26.0192	29.0008	23.0375
1089	26.0205	29.0523	22.9886
1090	25.9606	29.0388	22.8825
1091	25.9295	29.0522	22.8068
1092	25.9147	29.0784	22.751
1093	25.8889	29.0914	22.6864
1094	25.9255	29.1606	22.6904
1095	25.9612	29.2162	22.7062
1096	26.0726	29.3476	22.7976
1097	26.2436	29.5334	22.9538
1098	26.4232	29.7213	23.125
1099	26.6649	29.9551	23.3748
1100	26.9378	30.2274	23.6483

## Sheet: B - Sacc. amp. (deg) - Toward
spikes	SFtowards_mean	CI_towards_UP	CI_towards_Down
0	0.207262	0.233899	0.180625
1	0.231379	0.252445	0.210313
2	0.281362	0.351976	0.210748

## Sheet: C - Sacc. amp. (deg) - Opposite
spikes	SFopposite_mean	CI_opposite_UP	CI_opposite_Down
0	0.215214	0.238174	0.192254
1	0.230964	0.254918	0.207011
2	0.131391	0.131391	0.131391
