# Supplementary material for: Instantaneous movement-unrelated midbrain activity modifies ongoing eye movements
Source: eLife. 2021 May 6;10:e64150. doi: 10.7554/eLife.64150 (PMC8143798; doi:10.7554/eLife.64150)
Supplement: Figure 7—source data 1. [file elife-64150-fig7-data1.xlsx]

## Sheet: A - spikes raster
t-150	t-149	t-148	t-147	t-146	t-145	t-144	t-143	t-142	t-141	t-140	t-139	t-138	t-137	t-136	t-135	t-134	t-133	t-132	t-131	t-130	t-129	t-128	t-127	t-126	t-125	t-124	t-123	t-122	t-121	t-120	t-119	t-118	t-117	t-116	t-115	t-114	t-113	t-112	t-111	t-110	t-109	t-108	t-107	t-106	t-105	t-104	t-103	t-102	t-101
0	0	0	0	0	0	0	0	0	0	0	0	0	0	0	0	0	0	0	0	0	0	0	0	0	0	0	0	0	0	0	0	0	0	0	0	0	0	0	0	0	0	0	0	0	0	0	0	0	0
0	0	0	0	0	0	0	0	0	0	0	0	0	0	0	0	0	0	0	0	0	0	0	0	0	0	0	0	0	0	0	0	0	0	0	0	0	0	0	0	0	0	0	0	0	0	0	0	0	0
0	0	0	0	0	0	0	0	0	0	0	0	0	0	0	0	0	0	0	0	0	0	0	0	0	0	0	0	0	0	0	0	0	0	0	0	0	0	0	0	0	0	0	0	0	0	0	0	0	0
0	0	0	0	0	0	0	0	0	0	0	0	0	0	0	0	0	0	0	0	0	0	0	0	0	0	0	0	0	0	0	0	0	0	0	0	0	0	0	0	0	0	0	0	0	0	0	0	0	0
0	0	0	0	0	0	0	0	0	0	0	0	0	0	0	0	0	0	0	0	0	0	0	0	0	0	0	0	0	0	0	0	0	0	0	0	0	0	0	0	0	0	0	0	0	0	0	0	0	0
0	0	0	0	0	0	0	0	0	0	0	0	0	0	0	0	0	0	0	0	0	0	0	0	0	0	0	0	0	0	0	0	0	0	0	0	0	0	0	0	0	0	0	0	0	0	0	0	0	0
0	0	0	0	0	0	0	0	0	0	0	0	0	0	0	0	0	0	0	0	0	0	0	0	0	0	0	0	0	0	0	0	0	0	0	0	0	0	0	0	0	0	0	0	0	0	0	0	0	0
0	0	0	0	0	0	0	0	0	0	0	0	0	0	0	0	0	0	0	0	0	0	0	0	0	0	0	0	0	0	0	0	0	0	0	0	0	0	0	0	0	0	0	0	0	0	0	0	0	0
0	0	0	0	0	0	0	0	0	0	0	0	0	0	0	0	0	0	0	0	0	0	0	0	0	0	0	0	0	0	0	0	0	0	0	0	0	0	0	0	0	0	0	0	0	0	0	0	0	0
0	0	0	0	0	0	0	0	0	0	0	0	0	0	0	0	0	0	0	0	0	0	0	0	0	0	0	0	0	0	0	0	0	0	0	0	0	0	0	0	0	0	0	0	0	0	0	0	0	0
0	0	0	0	0	0	0	0	0	0	0	0	0	0	0	0	0	0	0	0	0	0	0	0	0	0	0	0	0	0	0	0	0	0	0	0	0	0	0	0	0	0	0	0	0	0	0	0	0	0
0	0	0	0	0	0	0	0	0	0	0	0	0	0	0	0	0	0	0	0	0	0	0	0	0	0	0	0	0	0	0	0	0	0	0	0	0	0	0	0	0	0	0	0	0	0	0	0	0	0
0	0	0	0	0	0	0	0	0	0	0	0	0	0	0	0	0	0	0	0	0	0	0	0	0	0	0	0	0	0	0	0	0	0	0	0	0	0	0	0	0	0	0	0	0	0	0	0	0	0
0	0	0	0	0	0	0	0	0	0	0	0	0	0	0	0	0	0	0	0	0	0	0	0	0	0	0	0	0	0	0	0	0	0	0	0	0	0	0	0	0	0	0	0	0	0	0	0	0	0
0	0	0	0	0	0	0	0	0	0	0	0	0	0	0	0	0	0	0	0	0	0	0	0	0	0	0	0	0	0	0	0	0	0	0	0	0	0	0	0	0	0	0	0	0	0	0	0	0	0
0	0	0	0	0	0	0	0	0	0	0	0	0	0	0	0	0	0	0	0	0	0	0	0	0	0	0	0	0	0	0	0	0	0	0	0	0	0	0	0	0	0	0	0	0	0	0	0	0	0
0	0	0	0	0	0	0	0	0	0	0	0	0	0	0	0	0	0	0	0	0	0	0	0	0	0	0	0	0	0	0	0	0	0	0	0	0	0	0	0	0	0	0	0	0	0	0	0	0	0
0	0	0	0	0	0	0	0	0	0	0	0	0	0	0	0	0	0	0	0	0	0	0	0	0	0	0	0	0	0	0	0	0	0	0	0	0	0	0	0	0	0	0	0	0	0	0	0	0	0
0	0	0	0	0	0	0	0	0	0	0	0	0	1	0	0	0	0	0	0	0	0	0	0	0	0	0	0	0	0	0	0	0	0	0	0	0	0	0	0	0	0	0	0	0	0	0	0	0	0
0	0	0	0	0	0	0	0	0	0	0	0	0	0	0	0	0	0	0	0	0	0	0	0	0	0	0	0	0	0	0	0	0	0	0	0	0	0	0	0	0	0	0	0	0	0	0	0	0	0
0	0	0	0	0	0	0	0	0	0	0	0	0	0	0	0	0	0	0	0	0	0	0	0	0	0	0	0	0	0	0	0	0	0	0	0	0	0	0	0	0	0	0	0	0	0	0	0	0	0
0	0	0	0	0	0	0	0	0	0	0	0	0	0	0	0	0	0	0	0	0	0	0	0	0	0	0	0	0	0	0	0	0	0	0	0	0	0	0	0	0	0	0	0	0	0	0	0	0	0
0	0	0	0	0	0	0	0	0	0	0	0	0	0	0	0	0	0	0	0	0	0	0	0	0	0	0	0	0	0	0	0	0	0	0	0	0	0	0	0	0	0	0	0	0	0	0	0	0	0
0	0	0	0	0	0	0	0	0	0	0	0	0	0	0	0	0	0	0	0	0	0	0	0	0	0	0	0	0	0	0	0	0	0	0	0	0	0	0	0	0	0	0	0	0	0	0	0	0	0
[truncated: 1,201 more columns]

## Sheet: A - Firing rate (spikes per s)
time	mean	CI_UP	CI_Down
-150	0.757456	1.4559	0.0590105
-149	0.84209	1.63342	0.0507629
-148	0.93252	1.8204	0.0446384
-147	1.00821	1.99519	0.0212279
-146	1.10869	2.19403	0.0233434
-145	1.20705	2.38868	0.0254144
-144	1.30106	2.57472	0.0273938
-143	1.38844	2.74764	0.0292335
-142	1.46694	2.90299	0.0308864
-141	1.53446	3.03661	0.032308
-140	1.58912	3.14477	0.0334588
-139	1.62934	3.22438	0.0343058
-138	1.65397	3.27311	0.0348243
-137	1.66226	3.28952	0.0349989
-136	1.65397	3.27311	0.0348243
-135	1.62934	3.22438	0.0343058
-134	1.58912	3.14477	0.0334588
-133	1.53446	3.03661	0.032308
-132	1.46694	2.90299	0.0308864
-131	1.38844	2.74764	0.0292335
-130	1.30106	2.57472	0.0273938
-129	1.20705	2.38868	0.0254144
-128	1.10869	2.19403	0.0233434
-127	1.00821	1.99519	0.0212279
-126	0.907717	1.79632	0.019112
-125	0.809109	1.60118	0.0170358
-124	0.714036	1.41304	0.015034
-123	0.623864	1.23459	0.0131355
-122	0.539657	1.06795	0.0113625
-121	0.46217	0.914609	0.00973099
-120	0.391871	0.775491	0.00825084
-119	0.328959	0.650992	0.00692623
-118	0.273399	0.541042	0.00575642
-117	0.224962	0.445188	0.00473658
-116	0.183265	0.362671	0.00385864
-115	0.147811	0.292509	0.00311215
-114	0.118029	0.233574	0.00248511
-113	0.0933105	0.184656	0.00196465
-112	0.0730346	0.144531	0.00153774
-111	0.0565957	0.112	0.00119162
-110	0.0434206	0.0859269	0.000914219
-109	0.032981	0.0652677	0.000694416
-108	0.0248022	0.0490822	0.00052221
-107	0	0	0
-106	0	0	0
-105	0	0	0
-104	0	0	0
-103	0	0	0
-102	0	0	0
-101	0	0	0
-100	0	0	0
-99	0	0	0
-98	0.0248022	0.0490822	0.00052221
-97	0.032981	0.0652677	0.000694416
-96	0.0434206	0.0859269	0.000914219
-95	0.0565957	0.112	0.00119162
-94	0.0730346	0.144531	0.00153774
-93	0.0933105	0.184656	0.00196465
-92	0.118029	0.233574	0.00248511
-91	0.147811	0.292509	0.00311215
-90	0.183265	0.362671	0.00385864
-89	0.224962	0.445188	0.00473658
-88	0.273399	0.541042	0.00575642
-87	0.328959	0.650992	0.00692623
-86	0.391871	0.775491	0.00825084
-85	0.486972	0.939007	0.0349375
-84	0.572638	1.10051	0.0447608
-83	0.667285	1.27764	0.056925
-82	0.770632	1.46942	0.0718429
-81	0.882143	1.67433	0.0899521
-80	1.00103	1.89036	0.111699
-79	1.12624	2.11496	0.137519
-78	1.2565	2.34519	0.167805
-77	1.39031	2.57775	0.202874
-76	1.52602	2.80911	0.242927
-75	1.66184	3.03567	0.287997
-74	1.7959	3.25389	0.337907
-73	1.92633	3.46045	0.392214
-72	2.05129	3.6524	0.450172
-71	2.169	3.8273	0.510698
-70	2.27783	3.9833	0.572362
-69	2.3763	4.11919	0.633404
-68	2.46308	4.23437	0.691782
-67	2.53706	4.32885	0.74527
-66	2.59733	4.40307	0.791589
-65	2.64315	4.45772	0.828578
-64	2.67399	4.49359	0.854386
-63	2.68949	4.51134	0.86765
-62	2.68949	4.51134	0.86765
-61	2.67399	4.49359	0.854386
-60	2.64315	4.45772	0.828578
-59	2.59733	4.40307	0.791589
-58	2.53706	4.32885	0.74527
-57	2.46308	4.23437	0.691782
-56	2.3763	4.11919	0.633404
-55	2.27783	3.9833	0.572362
-54	2.169	3.8273	0.510698
-53	2.05129	3.6524	0.450172
-52	1.92633	3.46045	0.392214
-51	1.7959	3.25389	0.337907
-50	1.66184	3.03567	0.287997
-49	1.52602	2.80911	0.242927
-48	1.39031	2.57775	0.202874
-47	1.2565	2.34519	0.167805
-46	1.12624	2.11496	0.137519
-45	1.00103	1.89036	0.111699
-44	0.882143	1.67433	0.0899521
-43	0.770632	1.46942	0.0718429
-42	0.667285	1.27764	0.056925
-41	0.572638	1.10051	0.0447608
-40	0.486972	0.939007	0.0349375
-39	0.391871	0.775491	0.00825084
-38	0.328959	0.650992	0.00692623
-37	0.273399	0.541042	0.00575642
-36	0.224962	0.445188	0.00473658
-35	0.183265	0.362671	0.00385864
-34	0.172613	0.31829	0.0269363
-33	0.15101	0.269621	0.0323997
-32	0.136731	0.235793	0.0376694
-31	0.12963	0.218157	0.0411037
-30	0.12963	0.218157	0.0411037
-29	0.136731	0.235793	0.0376694
-28	0.15101	0.269621	0.0323997
-27	0.172613	0.31829	0.0269363
-26	0.183265	0.362671	0.00385864
-25	0.224962	0.445188	0.00473658
-24	0.273399	0.541042	0.00575642
-23	0.353761	0.675654	0.0318688
-22	0.424852	0.808427	0.041277
-21	0.505591	0.958178	0.053003
-20	0.596252	1.12504	0.0674621
-19	0.696899	1.3087	0.0850946
-18	0.807346	1.50834	0.10635
-17	0.927138	1.72261	0.131668
-16	1.05553	1.94961	0.16145
-15	1.19148	2.18693	0.196024
-14	1.33365	2.43169	0.235612
-13	1.48045	2.68061	0.280285
-12	1.63002	2.93012	0.329917
-11	1.78031	3.17646	0.38415
-10	1.92911	3.41587	0.442351
-9	2.07412	3.64464	0.503592
-8	2.21298	3.85932	0.566638
-7	2.34338	4.0568	0.629962
-6	2.46308	4.23437	0.691782
-5	2.56998	4.38983	0.750126
-4	2.66218	4.52143	0.802932
-3	2.73803	4.6279	0.848169
-2	2.79616	4.70836	0.883971
-1	2.83552	4.76225	0.908781
0	2.85537	4.78927	0.92148
1	2.85537	4.78927	0.92148
2	2.83552	4.76225	0.908781
3	2.79616	4.70836	0.883971
4	2.73803	4.6279	0.848169
5	2.66218	4.52143	0.802932
6	2.56998	4.38983	0.750126
7	2.46308	4.23437	0.691782
8	2.34338	4.0568	0.629962
9	2.21298	3.85932	0.566638
10	2.07412	3.64464	0.503592
11	1.92911	3.41587	0.442351
12	1.78031	3.17646	0.38415
13	1.63002	2.93012	0.329917
14	1.48045	2.68061	0.280285
15	1.33365	2.43169	0.235612
16	1.21628	2.21079	0.221767
17	1.08851	1.98155	0.195471
18	0.970558	1.76505	0.176063
19	0.888744	1.58836	0.189129
20	0.802915	1.41455	0.191276
21	0.732983	1.26462	0.201346
22	0.705018	1.16602	0.244013
23	0.703481	1.10711	0.299853
24	0.731541	1.09543	0.367655
25	0.798993	1.1725	0.425483
26	0.909988	1.29793	0.522042
27	1.03825	1.46767	0.60883
28	1.25524	1.75578	0.754695
29	1.50618	2.09236	0.919993
30	1.86492	2.55283	1.177
31	2.30414	3.12733	1.48095
32	2.80955	3.7724	1.84671
33	3.40912	4.55412	2.26412
34	4.11265	5.43974	2.78555
35	5.0293	6.55305	3.50556
36	6.05917	7.79111	4.32724
37	7.25439	9.23813	5.27065
38	8.57498	10.8148	6.3352
39	10.0952	12.604	7.58634
40	11.785	14.596	8.97403
41	13.6489	16.7657	10.5322
42	15.762	19.1982	12.3257
43	18.1202	21.889	14.3513
44	20.6382	24.7361	16.5403
45	23.396	27.8219	18.9701
46	26.3478	31.1019	21.5936
47	29.5035	34.5749	24.4322
48	32.85	38.2259	27.4741
49	36.3686	42.038	30.6991
50	40.06	45.9965	34.1235
51	43.8534	50.0514	37.6555
52	47.7079	54.1398	41.2761
53	51.6255	58.2726	44.9784
54	55.5187	62.3597	48.6778
55	59.4057	66.4305	52.381
56	63.1509	70.3384	55.9634
57	66.7372	74.0756	59.3987
58	70.1349	77.6146	62.6553
59	73.2741	80.8797	65.6685
60	76.1307	83.8633	68.3982
61	78.6191	86.474	70.7642
62	80.6948	88.6676	72.7219
63	82.3437	90.4277	74.2598
64	83.591	91.796	75.3861
65	84.3876	92.6894	76.0859
66	84.682	93.0648	76.2992
67	84.5156	92.9616	76.0697
68	83.9026	92.391	75.4142
69	82.9153	91.422	74.4087
70	81.5017	90.0034	73
71	79.8112	88.3032	71.3192
72	77.7631	86.2101	69.3161
73	75.4614	83.8445	67.0784
74	72.9571	81.2604	64.6538
75	70.3079	78.5331	62.0826
76	67.6142	75.7589	59.4694
77	64.8355	72.8884	56.7826
78	62.0359	70.0013	54.0705
79	59.3228	67.2034	51.4423
80	56.7398	64.5417	48.9379
81	54.2169	61.9591	46.4747
82	51.8651	59.5482	44.1821
83	49.6371	57.277	41.9972
84	47.5629	55.1652	39.9606
85	45.7154	53.2984	38.1324
86	44.0729	51.6348	36.511
87	42.5741	50.127	35.0213
88	41.2808	48.8342	33.7273
89	40.1238	47.6661	32.5815
90	39.1156	46.6662	31.565
91	38.3028	45.852	30.7537
92	37.6546	45.1993	30.1099
93	37.0918	44.6353	29.5483
94	36.5633	44.1072	29.0194
95	36.2163	43.7279	28.7048
96	35.994	43.4689	28.5191
97	35.8732	43.314	28.4324
98	35.7717	43.1578	28.3855
99	35.7898	43.1238	28.4558
100	35.8543	43.1013	28.6074
101	35.9168	43.0728	28.7609
102	35.9758	43.0232	28.9284
103	36.1195	43.0499	29.189
104	36.2744	43.0727	29.4762
105	36.4849	43.1139	29.856
106	36.706	43.1813	30.2308
107	36.8869	43.2021	30.5718
108	37.0854	43.2174	30.9533
109	37.2373	43.1922	31.2824
110	37.4242	43.1995	31.6489
111	37.5951	43.1881	32.0021
112	37.7484	43.1494	32.3475
113	37.883	43.102	32.664
114	37.9539	42.9967	32.911
115	38.0428	42.9048	33.1809
116	38.0983	42.7843	33.4124
117	38.0994	42.6116	33.5872
118	38.0659	42.4222	33.7095
119	37.999	42.217	33.7809
120	37.918	42.0195	33.8164
121	37.813	41.81	33.816
122	37.6323	41.5476	33.7171
123	37.3784	41.2378	33.5189
124	37.0522	40.8757	33.2287
125	36.7033	40.5145	32.8922
126	36.2801	40.0958	32.4643
127	35.8058	39.6378	31.9738
128	35.2013	39.0575	31.3451
129	34.5942	38.4787	30.7097
130	33.8407	37.7426	29.9387
131	33.0886	37.0143	29.1629
132	32.2701	36.2104	28.3298
133	31.3927	35.3362	27.4491
134	30.4712	34.403	26.5395
135	29.4785	33.3809	25.576
136	28.5272	32.3973	24.6571
137	27.5377	31.3612	23.7143
138	26.5218	30.285	22.7586
139	25.477	29.1845	21.7694
140	24.4959	28.1365	20.8553
141	23.5691	27.1457	19.9924
142	22.6814	26.1894	19.1733
143	21.8534	25.2928	18.4141
144	21.0568	24.4438	17.6698
145	20.3217	23.6654	16.978
146	19.6275	22.9335	16.3214
147	18.9938	22.263	15.7247
148	18.4209	21.6654	15.1764
149	17.926	21.1561	14.6958
150	17.4652	20.6827	14.2476
151	17.0417	20.2522	13.8312
152	16.7369	19.929	13.5449
153	16.4574	19.6342	13.2807
154	16.2317	19.4008	13.0627
155	16.0205	19.167	12.8741
156	15.874	19.0107	12.7373
157	15.7825	18.9239	12.6411
158	15.682	18.8446	12.5195
159	15.6349	18.8243	12.4455
160	15.6369	18.8647	12.4091
161	15.6603	18.9396	12.381
162	15.6956	19.0409	12.3503
163	15.7204	19.1475	12.2932
164	15.7348	19.2467	12.223
165	15.756	19.3561	12.156
166	15.8382	19.5292	12.1471
167	15.8673	19.6498	12.0848
168	15.8996	19.7646	12.0347
169	15.9624	19.9125	12.0123
170	16.019	20.0308	12.0072
171	15.997	20.0599	11.9341
172	15.9748	20.0717	11.8779
173	15.9286	20.0472	11.81
174	15.8601	19.9901	11.7301
175	15.772	19.9056	11.6384
176	15.6678	19.8002	11.5353
177	15.5513	19.681	11.4216
178	15.4088	19.5332	11.2844
179	15.2681	19.3986	11.1377
180	15.1328	19.2663	10.9994
181	15.0246	19.1722	10.877
182	14.9294	19.1162	10.7426
183	14.8508	19.0684	10.6331
184	14.785	19.0397	10.5304
185	14.7582	19.0517	10.4647
186	14.71	19.0517	10.3683
187	14.7239	19.1104	10.3374
188	14.7123	19.1462	10.2784
189	14.7318	19.2154	10.2481
190	14.7528	19.2851	10.2205
191	14.7945	19.3759	10.2132
192	14.8094	19.4317	10.1872
193	14.7914	19.4438	10.1389
194	14.7763	19.4525	10.1002
195	14.7161	19.4057	10.0265
196	14.6731	19.364	9.98213
197	14.5782	19.2513	9.90518
198	14.449	19.0885	9.8095
199	14.3103	18.9071	9.71363
200	14.0855	18.6203	9.55074
201	13.8797	18.3455	9.41394
202	13.6546	18.0644	9.24475
203	13.3977	17.738	9.05734
204	13.1326	17.4077	8.85755
205	12.8834	17.1001	8.66682
206	12.6322	16.804	8.46045
207	12.3852	16.5281	8.24233
208	12.1723	16.2997	8.04489
209	11.956	16.085	7.82697
210	11.7577	15.9	7.61537
211	11.5854	15.7403	7.43047
212	11.4396	15.6205	7.25875
213	11.3017	15.5005	7.10291
214	11.2373	15.447	7.02753
215	11.1973	15.4249	6.96972
216	11.1821	15.4081	6.95618
217	11.192	15.3952	6.98883
218	11.2274	15.4062	7.04857
219	11.2459	15.3717	7.12018
220	11.3076	15.3796	7.23553
221	11.3878	15.3976	7.37806
222	11.512	15.4606	7.56345
223	11.6395	15.521	7.75803
224	11.8148	15.6391	7.99037
225	12.0039	15.7703	8.23742
226	12.2271	15.9434	8.51076
227	12.4797	16.1568	8.8026
228	12.7074	16.346	9.06873
229	12.9986	16.6194	9.37781
230	13.3873	17.0102	9.76438
231	13.7815	17.4218	10.1411
232	14.2223	17.894	10.5505
233	14.714	18.4271	11.0008
234	15.1871	18.9499	11.4242
235	15.6728	19.4913	11.8542
236	16.1888	20.0618	12.3158
237	16.6858	20.6157	12.7559
238	17.1739	21.1569	13.191
239	17.6445	21.6735	13.6155
240	18.1384	22.2157	14.0611
241	18.5459	22.6447	14.4471
242	18.9884	23.1185	14.8583
243	19.3525	23.4934	15.2116
244	19.6778	23.8236	15.532
245	19.987	24.1221	15.852
246	20.2633	24.3703	16.1563
247	20.4856	24.571	16.4001
248	20.6946	24.7587	16.6304
249	20.8539	24.8948	16.8129
250	20.9943	25.0178	16.9709
251	21.123	25.1338	17.1121
252	21.2656	25.265	17.2661
253	21.4125	25.4167	17.4083
254	21.5476	25.5602	17.5349
255	21.6766	25.701	17.6523
256	21.8462	25.8925	17.7998
257	22.0346	26.1069	17.9623
258	22.2248	26.3194	18.1302
259	22.4579	26.5827	18.333
260	22.7065	26.8604	18.5525
261	22.9476	27.125	18.7702
262	23.2411	27.4474	19.0348
263	23.5128	27.7429	19.2828
264	23.7719	28.0236	19.5203
265	24.0081	28.2797	19.7365
266	24.2349	28.5285	19.9412
267	24.4057	28.7236	20.0879
268	24.5782	28.922	20.2343
269	24.6781	29.0408	20.3154
270	24.6997	29.0912	20.3082
271	24.656	29.0697	20.2422
272	24.5191	28.9501	20.0881
273	24.3116	28.7535	19.8697
274	24.0586	28.5126	19.6047
275	23.7217	28.1778	19.2657
276	23.3253	27.7824	18.8682
277	22.9023	27.3427	18.462
278	22.44	26.868	18.0119
279	21.97	26.377	17.563
280	21.4649	25.8538	17.0759
281	20.939	25.3126	16.5654
282	20.4476	24.8119	16.0833
283	19.9851	24.3544	15.6158
284	19.5442	23.9252	15.1632
285	19.1695	23.5835	14.7554
286	18.8676	23.3257	14.4095
287	18.6256	23.1437	14.1075
288	18.4213	23.0124	13.8302
289	18.3274	22.9942	13.6605
290	18.2567	23.006	13.5074
291	18.2655	23.1071	13.424
292	18.2684	23.19	13.3469
293	18.3535	23.3485	13.3586
294	18.4883	23.5433	13.4333
295	18.6544	23.7467	13.5622
296	18.822	23.9511	13.6928
297	19.0224	24.1784	13.8663
298	19.2098	24.375	14.0447
299	19.3632	24.5307	14.1957
300	19.5646	24.7171	14.412
301	19.7279	24.8616	14.5943
302	19.963	25.0868	14.8391
303	20.1626	25.2607	15.0645
304	20.3961	25.4731	15.3191
305	20.6047	25.6677	15.5417
306	20.868	25.9219	15.814
307	21.1193	26.1713	16.0673
308	21.4249	26.486	16.3639
309	21.7478	26.8242	16.6714
310	22.111	27.2042	17.0177
311	22.4949	27.5851	17.4047
312	22.8298	27.9457	17.7139
313	23.1825	28.3206	18.0445
314	23.5221	28.6772	18.367
315	23.8419	29.0066	18.6772
316	24.1356	29.3002	18.971
317	24.3971	29.55	19.2442
318	24.6213	29.7496	19.4931
319	24.8044	29.8943	19.7145
320	24.9438	29.9816	19.906
321	25.0696	30.0556	20.0835
322	25.1655	30.0805	20.2506
323	25.2048	30.0387	20.371
324	25.2343	29.9771	20.4915
325	25.1981	29.8552	20.5411
326	25.1673	29.7322	20.6024
327	25.0849	29.5773	20.5925
328	25.0139	29.4301	20.5977
329	24.9317	29.2973	20.566
330	24.8577	29.1955	20.5198
331	24.7681	29.0961	20.4402
332	24.6624	28.9962	20.3285
333	24.5197	28.8749	20.1644
334	24.3784	28.7567	20
335	24.2093	28.6111	19.8075
336	24.014	28.4285	19.5995
337	23.7877	28.2109	19.3644
338	23.5014	27.921	19.0818
339	23.1932	27.5851	18.8013
340	22.8359	27.1807	18.4911
341	22.4278	26.7072	18.1484
342	21.9502	26.1429	17.7574
343	21.4454	25.5481	17.3427
344	20.8909	24.8977	16.884
345	20.296	24.2153	16.3768
346	19.6714	23.5089	15.834
347	19.0411	22.7958	15.2864
348	18.3579	22.0451	14.6707
349	17.6898	21.3234	14.0563
350	16.9963	20.5978	13.3948
351	16.3285	19.9059	12.7511
352	15.6652	19.2263	12.1042
353	14.9977	18.5481	11.4474
354	14.365	17.9029	10.8272
355	13.7936	17.3193	10.268
356	13.3179	16.8355	9.80037
357	12.8641	16.3615	9.36667
358	12.4719	15.9468	8.99708
359	12.1743	15.6232	8.72535
360	11.9611	15.4075	8.51466
361	11.7964	15.2345	8.35824
362	11.7443	15.1921	8.29651
363	11.7639	15.2422	8.28573
364	11.9219	15.4461	8.39765
365	12.1497	15.7456	8.55389
366	12.5115	16.1958	8.82709
367	12.9239	16.7298	9.11796
368	13.3791	17.3165	9.44177
369	13.9081	17.9991	9.81697
370	14.4785	18.7313	10.2257
371	15.1793	19.59	10.7686
372	15.9074	20.4705	11.3442
373	16.627	21.3373	11.9167
374	17.3439	22.1883	12.4994
375	18.0451	23.0066	13.0835
376	18.7181	23.7764	13.6599
377	19.376	24.5044	14.2476
378	19.9913	25.1722	14.8104
379	20.532	25.7376	15.3264
380	20.9724	26.1686	15.7761
381	21.3718	26.5391	16.2044
382	21.7188	26.8462	16.5914
383	21.9684	27.0393	16.8975
384	22.1616	27.1551	17.1681
385	22.2559	27.1621	17.3497
386	22.3194	27.1326	17.5062
387	22.2884	26.9959	17.5809
388	22.2095	26.8119	17.6071
389	22.0698	26.5675	17.5721
390	21.8505	26.2436	17.4575
391	21.6	25.8931	17.3069
392	21.3066	25.5116	17.1015
393	20.9776	25.1062	16.849
394	20.5962	24.6489	16.5435
395	20.1688	24.1485	16.1892
396	19.7441	23.6645	15.8236
397	19.3041	23.1719	15.4362
398	18.8558	22.6775	15.0342
399	18.431	22.2178	14.6442
400	18.0194	21.7718	14.2669
401	17.6293	21.3502	13.9084
402	17.2441	20.942	13.5463
403	16.8884	20.5682	13.2086
404	16.5487	20.2174	12.8799
405	16.2773	19.9328	12.6217
406	16.0343	19.6795	12.3891
407	15.8207	19.4619	12.1794
408	15.6961	19.3384	12.0539
409	15.6174	19.2699	11.9649
410	15.5828	19.2401	11.9255
411	15.6079	19.2664	11.9494
412	15.6715	19.3425	12.0006
413	15.7266	19.4045	12.0487
414	15.8271	19.5099	12.1444
415	15.8862	19.5568	12.2155
416	16.0219	19.6998	12.344
417	16.1534	19.8367	12.47
418	16.2556	19.9463	12.565
419	16.3457	20.0393	12.6521
420	16.4598	20.1585	12.7612
421	16.552	20.2555	12.8485
422	16.5958	20.3063	12.8852
423	16.5888	20.3056	12.872
424	16.5714	20.303	12.8399
425	16.5314	20.2842	12.7785
426	16.4512	20.2176	12.6847
427	16.3625	20.154	12.571
428	16.2684	20.0804	12.4564
429	16.131	19.965	12.2971
430	15.9543	19.7999	12.1087
431	15.7655	19.6256	11.9055
432	15.6108	19.4793	11.7423
433	15.4529	19.323	11.5827
434	15.2979	19.172	11.4237
435	15.152	19.0124	11.2915
436	14.9779	18.8244	11.1314
437	14.8215	18.6443	10.9987
438	14.7287	18.5348	10.9227
439	14.6368	18.418	10.8557
440	14.5924	18.3486	10.8361
441	14.5564	18.293	10.8199
442	14.5495	18.2728	10.8262
443	14.5726	18.2914	10.8539
444	14.626	18.3508	10.9012
445	14.6901	18.4303	10.9498
446	14.8046	18.5754	11.0337
447	14.9234	18.7371	11.1098
448	15.0906	18.9642	11.2169
449	15.2767	19.2114	11.3419
450	15.4516	19.4566	11.4467
451	15.6325	19.7045	11.5606
452	15.836	19.9704	11.7016
453	16.0553	20.2646	11.8461
454	16.2361	20.5109	11.9614
455	16.3904	20.7241	12.0567
456	16.5119	20.8966	12.1271
457	16.6196	21.0448	12.1944
458	16.6734	21.1285	12.2183
459	16.6699	21.1425	12.1973
460	16.6243	21.108	12.1406
461	16.6029	21.0746	12.1312
462	16.4994	20.9522	12.0466
463	16.3542	20.7752	11.9332
464	16.1784	20.5496	11.8071
465	15.978	20.2917	11.6644
466	15.7543	19.9981	11.5105
467	15.5152	19.6782	11.3523
468	15.2754	19.3386	11.2123
469	15.0435	19.0112	11.0758
470	14.803	18.6712	10.9348
471	14.5849	18.3479	10.8219
472	14.4375	18.1172	10.7578
473	14.3	17.8916	10.7084
474	14.1948	17.7084	10.6812
475	14.1237	17.5725	10.6748
476	14.1114	17.512	10.7108
477	14.1145	17.4821	10.7468
478	14.1476	17.4988	10.7965
479	14.1872	17.5404	10.8341
480	14.2747	17.6487	10.9008
481	14.3783	17.7758	10.9807
482	14.4842	17.9124	11.0559
483	14.6094	18.0769	11.1418
484	14.6677	18.1654	11.1701
485	14.7544	18.2875	11.2213
486	14.8139	18.3771	11.2508
487	14.8233	18.4105	11.236
488	14.8452	18.4424	11.2479
489	14.8112	18.4115	11.2108
490	14.7639	18.3646	11.1633
491	14.6441	18.2338	11.0543
492	14.4954	18.0659	10.9249
493	14.3446	17.8804	10.8087
494	14.1778	17.6773	10.6783
495	13.9946	17.4535	10.5358
496	13.7951	17.2116	10.3787
497	13.5672	16.934	10.2005
498	13.4083	16.745	10.0716
499	13.1982	16.5009	9.89544
500	13.0463	16.3096	9.78305
501	12.892	16.1217	9.66229
502	12.7585	15.958	9.55908
503	12.6499	15.8229	9.47686
504	12.5688	15.7197	9.41787
505	12.5171	15.6511	9.38316
506	12.5202	15.6522	9.38821
507	12.5424	15.6637	9.42114
508	12.6014	15.7297	9.47309
509	12.6893	15.8324	9.54615
510	12.8284	15.9903	9.66647
511	12.9802	16.1705	9.78991
512	13.1413	16.3565	9.92608
513	13.3433	16.6003	10.0864
514	13.5822	16.8823	10.282
515	13.8118	17.1559	10.4677
516	14.0275	17.4166	10.6384
517	14.2725	17.7	10.845
518	14.5176	17.9791	11.0561
519	14.7526	18.24	11.2652
520	14.9612	18.4652	11.4572
521	15.182	18.696	11.668
522	15.3812	18.8947	11.8677
523	15.563	19.065	12.061
524	15.726	19.2066	12.2453
525	15.863	19.315	12.4109
526	15.9735	19.3917	12.5552
527	16.0636	19.4522	12.6751
528	16.1338	19.4861	12.7816
529	16.1785	19.4967	12.8603
530	16.2232	19.5201	12.9263
531	16.2585	19.5404	12.9767
532	16.2628	19.5303	12.9953
533	16.2501	19.5121	12.9881
534	16.2222	19.4878	12.9565
535	16.187	19.4673	12.9067
536	16.1462	19.4523	12.8402
537	16.0953	19.4359	12.7547
538	16.0358	19.4196	12.652
539	15.9506	19.3842	12.517
540	15.9323	19.4342	12.4304
541	15.8991	19.4775	12.3206
542	15.8297	19.4908	12.1686
543	15.7863	19.536	12.0367
544	15.7461	19.5921	11.9001
545	15.7106	19.6591	11.762
546	15.6809	19.7363	11.6255
547	15.6392	19.7988	11.4797
548	15.6771	19.944	11.4101
549	15.6678	20.0255	11.3102
550	15.69	20.1475	11.2326
551	15.7181	20.2639	11.1722
552	15.7321	20.355	11.1091
553	15.7779	20.4658	11.0901
554	15.8287	20.557	11.1003
555	15.9003	20.6549	11.1457
556	15.9484	20.7073	11.1896
557	15.9517	20.6911	11.2123
558	15.9906	20.6992	11.282
559	15.9946	20.659	11.3301
560	16.0277	20.6479	11.4076
561	16.0467	20.6045	11.4888
562	16.0269	20.5112	11.5426
563	15.9862	20.3927	11.5798
564	15.9242	20.2514	11.597
565	15.8473	20.0892	11.6054
566	15.7378	19.9005	11.5751
567	15.6326	19.727	11.5382
568	15.5089	19.5417	11.4761
569	15.3752	19.3625	11.3878
570	15.2153	19.1632	11.2675
571	15.0924	19.0149	11.1699
572	14.9429	18.8477	11.038
573	14.8192	18.727	10.9114
574	14.7077	18.6257	10.7896
575	14.5821	18.5262	10.6379
576	14.4704	18.4582	10.4826
577	14.3756	18.4159	10.3353
578	14.2945	18.3959	10.193
579	14.2357	18.3888	10.0827
580	14.2017	18.4269	9.97642
581	14.1881	18.4848	9.89143
582	14.178	18.5445	9.81152
583	14.2141	18.6402	9.78797
584	14.272	18.7481	9.79587
585	14.3514	18.8656	9.83715
586	14.4573	18.9975	9.91713
587	14.6377	19.1928	10.0825
588	14.8008	19.3549	10.2467
589	14.9627	19.4992	10.4262
590	15.1495	19.6471	10.6519
591	15.3994	19.8643	10.9345
592	15.6361	20.0572	11.215
593	15.874	20.2457	11.5023
594	16.0899	20.4124	11.7673
595	16.3453	20.6203	12.0704
596	16.5692	20.7958	12.3426
597	16.7754	20.9584	12.5924
598	16.9595	21.1047	12.8143
599	17.0807	21.193	12.9684
600	17.2006	21.2809	13.1204
601	17.3092	21.368	13.2504
602	17.43	21.4669	13.3932
603	17.4794	21.4967	13.4622
604	17.4949	21.4919	13.4978
605	17.4775	21.4529	13.5021
606	17.4287	21.3809	13.4766
607	17.3134	21.2277	13.3991
608	17.2416	21.1399	13.3433
609	17.1246	21.0023	13.2469
610	16.9833	20.8413	13.1252
611	16.8195	20.66	12.9791
612	16.6165	20.4424	12.7905
613	16.4417	20.2635	12.6199
614	16.2362	20.051	12.4214
615	16.0197	19.832	12.2075
616	15.7872	19.5999	11.9745
617	15.5398	19.3554	11.7242
618	15.2786	19.0988	11.4585
619	15.0112	18.8276	11.1947
620	14.7206	18.5337	10.9075
621	14.4445	18.2632	10.6258
622	14.1608	17.9824	10.3391
623	13.872	17.6931	10.051
624	13.5626	17.3798	9.74544
625	13.2769	17.0829	9.47096
626	13.0177	16.8125	9.22284
627	12.7706	16.5497	8.99151
628	12.4965	16.2517	8.7412
629	12.2824	16.0106	8.5543
630	12.0457	15.7352	8.35613
631	11.8728	15.5209	8.22469
632	11.6618	15.271	8.05271
633	11.5221	15.0906	7.95365
634	11.4054	14.9312	7.87954
635	11.2878	14.7764	7.79929
636	11.2118	14.6643	7.75935
637	11.1529	14.5747	7.73119
638	11.0925	14.4812	7.70375
639	11.0718	14.4424	7.70126
640	11.0904	14.4524	7.72845
641	11.1307	14.4809	7.78052
642	11.1688	14.5124	7.82524
643	11.2225	14.5615	7.88344
644	11.2904	14.6266	7.95423
645	11.3775	14.709	8.04595
646	11.4451	14.7822	8.10798
647	11.5936	14.9425	8.24464
648	11.7301	15.0886	8.37164
649	11.8529	15.2279	8.478
650	11.9829	15.3704	8.5954
651	12.1591	15.5794	8.73891
652	12.3127	15.7612	8.86421
653	12.4842	15.9715	8.99683
654	12.6106	16.1308	9.09041
655	12.7498	16.2994	9.20014
656	12.8994	16.4821	9.31668
657	13.0162	16.6209	9.41144
658	13.1172	16.7378	9.4965
659	13.2015	16.8321	9.57092
660	13.2687	16.904	9.63331
661	13.2815	16.912	9.65104
662	13.3238	16.9557	9.69203
663	13.3717	17.0177	9.72575
664	13.4095	17.0685	9.75052
665	13.4402	17.1208	9.75957
666	13.4422	17.1519	9.73257
667	13.4172	17.1635	9.67086
668	13.4328	17.2342	9.63142
669	13.4738	17.3283	9.61924
670	13.5015	17.4251	9.57799
671	13.5132	17.5076	9.5189
672	13.5106	17.573	9.44819
673	13.5432	17.6791	9.40725
674	13.5883	17.7947	9.38183
675	13.6417	17.9146	9.36875
676	13.7302	18.0618	9.39858
677	13.8141	18.1998	9.42847
678	13.9201	18.3566	9.48367
679	14.075	18.5591	9.59096
680	14.2329	18.7575	9.70823
681	14.4139	18.973	9.85477
682	14.619	19.2075	10.0305
683	14.8483	19.4625	10.2341
684	15.101	19.7389	10.4631
685	15.3563	20.0138	10.6989
686	15.6343	20.3112	10.9573
687	15.972	20.6765	11.2675
688	16.2792	21.0205	11.538
689	16.6096	21.3894	11.8298
690	16.9372	21.7539	12.1205
691	17.2539	22.1191	12.3887
692	17.5266	22.4464	12.6068
693	17.7883	22.7604	12.8163
694	18.006	23.0286	12.9833
695	18.1965	23.261	13.1319
696	18.3112	23.4114	13.2109
697	18.3629	23.4862	13.2397
698	18.3476	23.4778	13.2174
699	18.2441	23.3549	13.1333
700	18.0999	23.1891	13.0107
701	17.8917	22.9273	12.856
702	17.6169	22.5757	12.6581
703	17.2806	22.1398	12.4215
704	16.8711	21.6083	12.1338
705	16.4374	21.035	11.8398
706	15.945	20.3863	11.5037
707	15.4445	19.7185	11.1704
708	14.9697	19.0806	10.8588
709	14.4467	18.3835	10.5099
710	13.9027	17.6619	10.1434
711	13.3875	16.9858	9.78932
712	12.8654	16.3174	9.41336
713	12.3842	15.7019	9.06641
714	11.9242	15.1255	8.72288
715	11.4957	14.6025	8.38897
716	11.1016	14.1309	8.07238
717	10.7376	13.7055	7.76967
718	10.4045	13.3247	7.48437
719	10.152	13.0403	7.26373
720	9.92107	12.7907	7.0514
721	9.70649	12.5572	6.85577
722	9.50751	12.3422	6.67284
723	9.39601	12.2241	6.56789
724	9.28673	12.1127	6.46079
725	9.23362	12.059	6.40822
726	9.21208	12.043	6.38119
727	9.22852	12.0788	6.37827
728	9.24622	12.1179	6.37453
729	9.32425	12.2236	6.42488
730	9.45536	12.4043	6.50645
731	9.61508	12.6246	6.6056
732	9.78457	12.8676	6.7015
733	10.054	13.211	6.89712
734	10.3141	13.5575	7.0707
735	10.5813	13.9093	7.25322
736	10.8945	14.3204	7.46863
737	11.207	14.727	7.68702
738	11.5376	15.1527	7.92251
739	11.8981	15.6072	8.18893
740	12.2827	16.0762	8.48931
741	12.6436	16.5149	8.7724
742	13.0172	16.9519	9.08254
743	13.3797	17.3638	9.3957
744	13.7262	17.7611	9.69138
745	14.0523	18.1108	9.99371
746	14.3111	18.3729	10.2493
747	14.5588	18.6107	10.507
748	14.7678	18.7921	10.7436
749	14.9427	18.9372	10.9482
750	15.0832	19.0198	11.1465
751	15.1844	19.05	11.3187
752	15.2487	19.0328	11.4646
753	15.2797	18.975	11.5844
754	15.2631	18.8617	11.6645
755	15.2702	18.774	11.7664
756	15.24	18.6567	11.8233
757	15.1964	18.535	11.8579
758	15.1444	18.4183	11.8706
759	15.0697	18.2967	11.8427
760	15.0171	18.2166	11.8175
761	14.9639	18.1587	11.7692
762	14.9109	18.1242	11.6977
763	14.882	18.142	11.622
764	14.8335	18.157	11.51
765	14.8055	18.2074	11.4036
766	14.7523	18.2476	11.257
767	14.6758	18.2657	11.0859
768	14.6379	18.3428	10.9331
769	14.5623	18.3752	10.7495
770	14.4643	18.378	10.5506
771	14.3412	18.3447	10.3377
772	14.1915	18.2705	10.1125
773	14.0147	18.1524	9.87695
774	13.7931	17.974	9.61215
775	13.5704	17.7731	9.36783
776	13.3254	17.5323	9.11844
777	13.0621	17.2578	8.86654
778	12.7488	16.9109	8.58678
779	12.4557	16.5885	8.32292
780	12.181	16.2749	8.08701
781	11.9302	15.9936	7.86676
782	11.6298	15.6617	7.59798
783	11.3862	15.3863	7.38609
784	11.153	15.1292	7.17683
785	10.9324	14.8937	6.97107
786	10.7311	14.6858	6.77639
787	10.5485	14.5036	6.59338
788	10.4015	14.3671	6.43585
789	10.2709	14.2562	6.2856
790	10.1309	14.1303	6.13147
791	9.99689	14.0084	5.98541
792	9.82915	13.8447	5.81361
793	9.70863	13.7254	5.69185
794	9.58432	13.594	5.57464
795	9.45546	13.4489	5.46205
796	9.32204	13.2899	5.35418
797	9.18489	13.1186	5.25119
798	9.07034	12.9791	5.16161
799	8.94544	12.8056	5.08524
800	8.85674	12.6845	5.02898
801	8.76664	12.5547	4.9786
802	8.67963	12.4328	4.92644
803	8.61718	12.3409	4.89343
804	8.58201	12.2757	4.88835
805	8.59466	12.2774	4.91188
806	8.63305	12.315	4.95109
807	8.69861	12.3899	5.00736
808	8.82252	12.5295	5.11549
809	8.9624	12.6943	5.23049
810	9.12896	12.8919	5.36605
811	9.31972	13.1177	5.52176
812	9.53129	13.3662	5.69642
813	9.75955	13.6311	5.88802
814	10.031	13.9379	6.12406
815	10.2996	14.244	6.35511
816	10.5733	14.5508	6.59577
817	10.8481	14.8539	6.84234
818	11.12	15.1491	7.09084
819	11.385	15.4328	7.33715
820	11.6393	15.7016	7.57706
821	11.9291	16.0105	7.84771
822	12.1495	16.2431	8.05583
823	12.3767	16.4775	8.27581
824	12.5655	16.6639	8.46706
825	12.7558	16.8601	8.65151
826	12.9031	17.0061	8.80017
827	13.0542	17.1625	8.94586
828	13.1838	17.2971	9.07044
829	13.2854	17.3998	9.17105
830	13.3592	17.4704	9.24795
831	13.4051	17.5087	9.30155
832	13.4236	17.5148	9.3324
833	13.4149	17.4887	9.3411
834	13.4042	17.4642	9.34418
835	13.3755	17.4062	9.34468
836	13.3066	17.3053	9.30787
837	13.2175	17.1789	9.25605
838	13.1343	17.05	9.21861
839	13.0172	16.8849	9.14945
840	12.8926	16.7145	9.07067
841	12.7875	16.5673	9.00778
842	12.6567	16.3876	8.92579
843	12.5214	16.2045	8.83836
844	12.3844	16.0226	8.7463
845	12.23	15.8307	8.62926
846	12.1024	15.6693	8.53545
847	11.9611	15.4956	8.42656
848	11.8319	15.3471	8.31681
849	11.7838	15.3038	8.26384
850	11.7113	15.242	8.18056
851	11.6784	15.227	8.12992
852	11.6455	15.2235	8.0675
853	11.6324	15.2476	8.01719
854	11.6398	15.2981	7.98148
855	11.6675	15.3726	7.9623
856	11.7145	15.4681	7.96076
857	11.7604	15.5582	7.96251
858	11.8257	15.6652	7.9862
859	11.9553	15.8476	8.06303
860	12.0859	16.0254	8.14629
861	12.2761	16.2592	8.293
862	12.4338	16.4525	8.41496
863	12.5931	16.6418	8.54443
864	12.7516	16.8246	8.67858
865	12.9068	16.9989	8.8147
866	13.0566	17.1628	8.95039
867	13.187	17.3079	9.06621
868	13.3391	17.4644	9.21384
869	13.5314	17.6621	9.40062
870	13.6816	17.8108	9.55234
871	13.8778	18.016	9.73963
872	14.0886	18.224	9.95328
873	14.2339	18.3495	10.1183
874	14.4375	18.5533	10.3217
875	14.6785	18.8095	10.5476
876	14.9189	19.0578	10.78
877	15.18	19.3331	11.0269
878	15.4641	19.6404	11.2879
879	15.7723	19.9831	11.5614
880	16.0673	20.3268	11.8078
881	16.4314	20.7535	12.1094
882	16.8128	21.2123	12.4132
883	17.2076	21.6984	12.7167
884	17.6105	22.2042	13.0169
885	18.0399	22.7432	13.3367
886	18.4279	23.2403	13.6156
887	18.8263	23.7557	13.8969
888	19.2011	24.2432	14.1591
889	19.5676	24.7182	14.4171
890	19.8744	25.1184	14.6304
891	20.18	25.5189	14.8412
892	20.3925	25.799	14.986
893	20.5227	25.9737	15.0718
894	20.5876	26.0765	15.0987
895	20.6244	26.1421	15.1066
896	20.5641	26.0847	15.0435
897	20.4063	25.9124	14.9003
898	20.2192	25.707	14.7315
899	19.9468	25.3932	14.5004
900	19.6203	25.016	14.2246
901	19.2424	24.5806	13.9042
902	18.8178	24.0909	13.5447
903	18.3585	23.5614	13.1556
904	17.8773	23.0072	12.7474
905	17.3873	22.4436	12.3309
906	16.901	21.8855	11.9166
907	16.4553	21.3736	11.537
908	16.0069	20.8495	11.1642
909	15.6254	20.4127	10.8382
910	15.2692	19.9963	10.542
911	14.9853	19.6719	10.2986
912	14.7519	19.4035	10.1003
913	14.5942	19.2263	9.96202
914	14.4931	19.1075	9.87882
915	14.4215	19.0189	9.82421
916	14.4168	18.9967	9.83687
917	14.43	18.9958	9.86419
918	14.4346	18.9848	9.88438
919	14.487	19.0164	9.95765
920	14.5343	19.0353	10.0333
921	14.6274	19.1023	10.1525
922	14.7101	19.151	10.2692
923	14.7763	19.1745	10.3781
924	14.8457	19.1988	10.4927
925	14.9223	19.2256	10.6191
926	14.9702	19.1979	10.7425
927	14.9843	19.1475	10.821
928	14.9659	19.0673	10.8646
929	14.9596	18.9989	10.9203
930	14.926	18.9218	10.9302
931	14.8749	18.8172	10.9325
932	14.8643	18.7772	10.9515
933	14.8511	18.7525	10.9496
934	14.8223	18.7292	10.9155
935	14.8251	18.7684	10.8819
936	14.8641	18.8669	10.8613
937	14.9014	18.9915	10.8112
938	14.9831	19.1936	10.7726
939	15.0693	19.4165	10.722
940	15.1791	19.6825	10.6757
941	15.312	19.987	10.637
942	15.4905	20.3452	10.6359
943	15.6701	20.7134	10.6267
944	15.8462	21.0821	10.6104
945	16.0802	21.5025	10.6579
946	16.2996	21.9024	10.6969
947	16.5163	22.2882	10.7444
948	16.7292	22.66	10.7985
949	16.9312	22.9989	10.8635
950	17.0718	23.2367	10.9069
951	17.2279	23.484	10.9717
952	17.344	23.6612	11.0267
953	17.4151	23.7614	11.0687
954	17.4185	23.7584	11.0786
955	17.393	23.6967	11.0893
956	17.3123	23.5478	11.0768
957	17.1576	23.2962	11.0189
958	16.9531	22.9693	10.9369
959	16.6998	22.5712	10.8284
960	16.4182	22.1255	10.7108
961	16.088	21.6205	10.5555
962	15.7143	21.0671	10.3615
963	15.327	20.5034	10.1506
964	14.9146	19.9165	9.91266
965	14.4841	19.319	9.64917
966	14.0491	18.7422	9.35601
967	13.5739	18.1197	9.02813
968	13.1186	17.5449	8.69236
969	12.6646	16.9819	8.34725
970	12.2175	16.4337	8.0013
971	11.7828	15.9025	7.66314
972	11.3473	15.3741	7.3205
973	10.964	14.8891	7.0389
974	10.6134	14.4403	6.78647
975	10.276	14.0017	6.55034
976	9.9985	13.6197	6.37733
977	9.7855	13.3218	6.2492
978	9.59934	13.0419	6.15674
979	9.46171	12.8212	6.10221
980	9.39944	12.6902	6.10863
981	9.37177	12.6171	6.12647
982	9.3967	12.6233	6.17015
983	9.4785	12.7158	6.24118
984	9.5768	12.8522	6.30144
985	9.72721	13.0627	6.39171
986	9.95802	13.3929	6.52313
987	10.2442	13.8021	6.68631
988	10.5369	14.2268	6.84696
989	10.822	14.6519	6.99201
990	11.1579	15.1373	7.17857
991	11.4706	15.5868	7.3544
992	11.7711	16.0146	7.52756
993	12.0528	16.4103	7.69532
994	12.31	16.7652	7.85488
995	12.5198	17.0566	7.98306
996	12.7207	17.3174	8.12404
997	12.8678	17.4957	8.23989
998	13.0023	17.6555	8.34917
999	13.1499	17.8229	8.47687
1000	13.2291	17.8986	8.55965
1001	13.2612	17.9172	8.60518
1002	13.2909	17.9212	8.66049
1003	13.2966	17.8946	8.69866
1004	13.263	17.8264	8.69966
1005	13.2342	17.7577	8.71072
1006	13.1876	17.6705	8.70472
1007	13.106	17.5405	8.6715
1008	13.0317	17.429	8.63439
1009	12.9401	17.3005	8.57965
1010	12.8306	17.1544	8.50678
1011	12.7022	16.9894	8.41496
1012	12.5534	16.8036	8.30321
1013	12.3827	16.5951	8.1704
1014	12.2134	16.3837	8.04313
1015	12.0028	16.1315	7.87398
1016	11.7685	15.8538	7.68332
1017	11.5107	15.5501	7.47127
1018	11.2543	15.2532	7.25547
1019	10.959	14.9088	7.0092
1020	10.6451	14.5428	6.74737
1021	10.315	14.1568	6.47314
1022	9.97797	13.7799	6.17606
1023	9.61919	13.3627	5.87564
1024	9.25994	12.9331	5.58676
1025	8.88504	12.4748	5.29526
1026	8.58315	12.1057	5.06056
1027	8.26876	11.7135	4.82403
1028	7.96591	11.3268	4.60502
1029	7.70454	10.9747	4.43439
1030	7.44784	10.6264	4.26931
1031	7.21867	10.3055	4.13181
1032	7.00228	9.98669	4.01787
1033	6.84336	9.74936	3.93736
1034	6.71944	9.55583	3.88306
1035	6.65663	9.43407	3.87919
1036	6.59525	9.33054	3.85995
1037	6.59504	9.30146	3.88861
1038	6.65474	9.34555	3.96392
1039	6.71208	9.40536	4.0188
1040	6.82432	9.53002	4.11863
1041	6.98791	9.71955	4.25627
1042	7.18818	9.97444	4.40193
1043	7.39795	10.2239	4.572
1044	7.62549	10.4939	4.75709
1045	7.86675	10.7784	4.95507
1046	8.08076	11.0215	5.14
1047	8.34721	11.3326	5.3618
1048	8.61346	11.6411	5.58582
1049	8.85828	11.9161	5.80043
1050	9.14578	12.241	6.05055
1051	9.40785	12.5401	6.27563
1052	9.68651	12.8506	6.52245
1053	9.96409	13.1686	6.75955
1054	10.2171	13.4555	6.9787
1055	10.464	13.7357	7.19218
1056	10.7045	14.0094	7.39971
1057	10.9386	14.2763	7.60094
1058	11.1535	14.5139	7.79311
1059	11.3905	14.785	7.99597
1060	11.6179	15.0449	8.19102
1061	11.8598	15.3136	8.40608
1062	12.0732	15.5533	8.59319
1063	12.2751	15.7774	8.7727
1064	12.4633	15.983	8.94369
1065	12.6358	16.1666	9.10499
1066	12.7899	16.3248	9.25511
1067	12.9233	16.4542	9.3923
1068	13.0332	16.5521	9.51444
1069	13.1423	16.6369	9.64768
1070	13.2067	16.6719	9.74148
1071	13.2434	16.6724	9.81449
1072	13.2513	16.6387	9.8639
1073	13.2109	16.5529	9.86889
1074	13.1635	16.4592	9.8679
1075	13.1093	16.3555	9.86305
1076	13.007	16.2094	9.80462
1077	12.8577	16.0149	9.70038
1078	12.7041	15.8272	9.58094
1079	12.523	15.6156	9.43042
1080	12.3163	15.3813	9.25122
1081	12.0671	15.1032	9.031
1082	11.844	14.8593	8.82875
1083	11.6326	14.6145	8.65075
1084	11.3961	14.3488	8.44341
1085	11.1152	14.0345	8.19589
1086	10.8543	13.7314	7.97719
1087	10.5934	13.423	7.76378
1088	10.3188	13.0897	7.54799
1089	10.0773	12.7941	7.36051
1090	9.84904	12.5091	7.18896
1091	9.63875	12.2416	7.03591
1092	9.45074	11.9983	6.90315
1093	9.31347	11.8148	6.81211
1094	9.19475	11.6525	6.73701
1095	9.11577	11.5388	6.69272
1096	9.07226	11.4727	6.67185
1097	9.04667	11.4411	6.65228
1098	9.08049	11.4802	6.68081
1099	9.14765	11.568	6.72726
1100	9.22709	11.686	6.7682

## Sheet: B - Sacc. amp. (deg) - Toward
spikes	SFtowards_mean	CI_towards_UP	CI_towards_Down
0	0.107709	0.116222	0.0991956
1	0.210952	0.273149	0.148754
2	0.297412	0.382218	0.212606

## Sheet: C - Sacc. amp. (deg) - Opposite
spikes	SFopposite_mean	CI_opposite_UP	CI_opposite_Down
0	0.132461	0.144004	0.120917
1	0.129389	0.146076	0.112702
2	0.112085	0.112085	0.112085

## Sheet: D - Sacc. amp. (deg) - Toward
spikes	SFtowards_mean	CI_towards_UP	CI_towards_Down
0	0.1039	0.105088	0.102712
1	0.137067	0.141485	0.132648
2	0.127796	0.134875	0.120716
3	0.141207	0.162789	0.119624
4	0.16477	0.204839	0.124701

## Sheet: E - Sacc. amp. (deg) - Opposite
spikes	SFopposite_mean	CI_opposite_UP	CI_opposite_Down
0	0.104835	0.106102	0.103567
1	0.123049	0.12677	0.119327
2	0.105276	0.111867	0.0986848
3	0.0906099	0.0975096	0.0837102
4	0.0809492	0.0927861	0.0691123
