# Supplementary material for: Instantaneous movement-unrelated midbrain activity modifies ongoing eye movements
Source: eLife. 2021 May 6;10:e64150. doi: 10.7554/eLife.64150 (PMC8143798; doi:10.7554/eLife.64150)
Supplement: Figure 9—source data 1. [file elife-64150-fig9-data1.xlsx]

## Sheet: A
Polar distance (deg)	Polar angle (deg)	Firing rate (spikes/s)
1.14083	0.897665	4
0.243591	5.85118	56
0.649448	5.44859	21
0.186231	2.64979	136
1.08779	5.88774	13
0.00609867	1.48583	44
0.972254	5.90607	23
0.0185265	5.1982	43
0.13381	3.81828	30
0.663507	5.98206	41
0.139963	5.03883	21
0.139688	1.13062	23
0.17479	0.919576	22
0.0201119	4.59706	83
1.2901	5.22598	6
0.332193	0.330605	40
0.148066	0.726676	33
0.269336	0.470264	18
0.934921	2.07636	0
0.223701	0.436734	40
0.228855	3.91001	137
0.474589	5.76608	32
0.18756	2.04245	85
0.374249	4.94762	0
0.113135	0.919338	26
0.169695	0.209545	48
1.24897	0.40198	10
0.214486	0.641519	39
0.044992	4.55594	39
0.543398	0.176673	26
0.108769	5.24548	31
0.331148	0.621194	26
0.0472956	5.33412	16
1.48689	5.44111	0
0.235903	0.653854	30
0.181583	3.92847	66
0.240113	0.338767	38
1.56623	5.67022	0
0.0727324	5.94582	33
1.22737	4.01484	0
0.0911888	5.0267	47
0.0288457	1.45856	17
1.73809	0.961396	0
0.521325	6.16342	18
0.141368	0.902055	32
1.72958	0.375586	1
0.0061196	4.57083	77
1.71393	0.0762219	0
0.408262	6.13865	33
1.38417	5.88967	1
0.00650553	1.54826	25
0.0089111	4.69188	29
1.57435	3.32585	38
0.401493	0.0650092	24
0.401915	6.15176	32
1.38981	6.24284	9
0.153735	6.13206	16
0.201384	2.04903	63
1.00352	0.188914	16
0.36207	0.0480943	26
0.0999845	4.38953	61
0.01956	1.48432	17
0.0952049	4.08556	35
0.174131	2.04395	58
0.229408	0.0710488	26
1.63272	5.72657	0
0.213543	0.691282	25
0.232568	3.31969	161
0.999978	6.25968	8
0.224619	0.878621	23
0.613949	0.455915	21
0.0515872	1.39305	16
0.128458	5.22585	40
0.137801	3.88798	54
0.345447	1.46801	0
0.051039	1.1305	17
0.283967	5.5722	19
1.10418	2.36474	4
0.183745	0.456735	31
0.183536	0.910859	20
0.0693984	1.01943	34
0.33371	5.01161	3
0.137599	0.3638	22
0.53022	5.91733	19
0.172271	3.68493	126
1.33921	0.0970275	13
0.0749287	0.631357	16
0.302681	5.48628	26
0.0229694	1.6208	41
0.780849	4.41116	0
0.128792	0.480487	15
0.25723	6.1427	12
0.375275	6.13344	21
1.04852	5.64388	5
0.290994	0.439849	16
0.0480353	4.61355	36
1.14564	6.16742	3
0.0773636	1.04631	13
0.0367565	4.57065	38
1.11853	3.8217	18
0.335081	6.10668	32
1.45195	0.0160129	13
0.176029	6.1277	23
0.183621	2.07818	115
0.144238	5.24735	43
0.0658232	5.80365	18
1.05451	0.60851	3
0.304039	3.71918	110
0.167454	1.03526	19
0.262969	3.58246	22
0.0491976	1.38101	18
0.0587693	4.14562	39
0.0501396	1.28817	19
0.0533627	1.83762	76
0.430679	1.98081	0
0.0717935	0.820551	33
0.753648	6.14573	14
0.238775	0.593914	27
0.0727257	5.94589	27
1.34081	0.597597	1
0.119085	0.849022	29
0.298626	6.08267	24
0.572077	2.57313	102
0.44361	5.73413	29
0.244757	2.71485	150
0.117862	0.682693	19
0.926958	5.50941	0
0.272385	6.07553	33
0.202008	3.13795	147
0.270938	5.40751	19
1.65334	3.28796	40
0.287446	0.434306	12
1.53458	2.94702	36
0.458656	0.238948	13
0.231431	0.591202	18
0.0726461	4.51744	39
0.278467	1.16576	19
0.12682	4.26262	53
0.25072	6.169	28
0.50714	5.09445	0
0.199373	2.39732	134
0.0798465	0.704397	30
0.323734	2.46883	139
0.137182	6.19772	27
0.0803978	2.07233	18
0.682639	6.20537	27
0.0820692	1.81359	39
0.0124227	4.28285	33
0.14924	1.8085	42
0.212049	5.73659	41
0.108361	4.83051	0
0.906212	6.18461	6
0.0560972	1.30668	18
0.0979616	4.44127	43
1.41386	5.95236	0
0.259729	5.58723	33
0.0550522	4.27834	62
0.82598	5.00043	0
1.78257	0.436136	0
0.0195332	1.22109	21
0.0769486	4.87897	5
0.0462078	1.74675	44
0.12298	5.86248	31
1.62044	0.460029	3
0.314683	6.09874	8
0.168027	1.04191	24
1.33432	3.12777	44
0.155334	6.12378	11
0.132431	5.83035	29
0.122215	1.11337	14
0.108695	5.09455	19
0.0365128	1.32296	7
1.22141	1.00663	0
1.18919	4.1193	0
0.203436	6.23173	40
0.166328	0.344802	29
0.684366	5.07144	5
0.305471	6.20707	27
0.219738	6.10363	33
0.192219	5.28812	17
0.0380956	1.71099	27
0.377105	1.89888	18
0.306582	5.37249	26
1.41147	5.68272	0
0.279215	5.61379	24
1.46603	0.252986	5
0.406126	0.00878774	12
0.241601	2.5966	165
1.88999	0.278161	0
0.378441	5.91527	16
0.153243	5.29816	23
0.192866	0.84546	25
1.46221	5.46812	0
0.0675084	4.93703	16
0.76603	5.67012	5
0.0871065	1.74608	25
0.156623	5.55389	10
0.156536	3.71287	113
0.864455	0.758581	1
0.110369	1.92261	63
1.45965	5.95077	0
0.181741	6.17301	19
0.119663	1.00529	18
1.28384	2.48522	0
0.0802147	6.14144	17
1.75125	3.07633	21
0.0999438	0.724995	20
1.28935	2.22942	0
0.360624	5.79205	26
0.114332	6.2531	11
0.235731	1.10877	6
0.218909	5.65575	16
0.104548	1.79374	34
0.471	0.954199	11
0.0156568	4.7386	2
0.0742846	5.38117	15
0.417136	0.141949	21
0.0526536	0.977665	14
0.158287	1.31572	5
0.411861	6.19418	19
1.54348	6.04392	0
0.326209	6.26238	24
0.04593	1.76933	40
0.152805	4.83457	0
0.149135	5.32699	17
0.418421	4.88535	6
0.0289802	0.712675	11
0.124563	0.658441	16
0.00222858	1.57512	39
0.0891119	4.93645	13
0.147502	1.96637	40
0.106244	6.2477	15
0.290778	2.23706	89
0.020549	4.51721	25
0.593556	5.92914	19
0.196918	6.22014	35
1.31244	5.71832	3
0.509163	6.27272	21
0.12225	0.786894	8
0.298385	4.46335	19
1.39985	0.267422	5
0.407311	5.64413	17
0.100167	1.84644	34
1.7821	0.236946	0
0.184812	0.769297	23
0.165395	3.62008	104
0.283075	0.524844	26
0.220491	4.15979	104
0.294962	0.649301	26
0.412013	5.53333	25
1.75576	0.101482	0
0.281969	0.641254	18
0.225899	4.21454	75
0.0757349	0.482402	12
0.220608	0.343278	13
0.918204	5.51192	0
0.23405	0.616697	18
0.053653	4.46732	22
0.382782	5.95921	13
0.440921	2.70815	156
1.99566	5.6873	0
0.109792	5.94708	18
0.361275	5.6877	22
0.00381396	1.54623	15
1.05972	0.0404358	12
0.37158	0.0215004	23
0.185433	5.41607	24
0.090004	5.06648	14
0.580639	5.5086	18
0.144288	1.08432	21
0.175645	4.16895	28
1.2204	5.9855	4
0.214595	5.65226	31
1.53779	0.437694	0
0.146175	5.44693	19
0.552028	0.0992184	19
0.271887	0.949455	9
0.289715	5.91157	27
0.167598	0.947304	13
0.0528206	5.01061	11
0.220752	0.579295	11
0.211398	5.43516	21
0.140053	0.932316	27
0.110758	5.89468	26
0.75179	5.85694	3
0.160938	5.27263	27
1.69703	3.45077	43
0.0247218	1.47099	21
0.172583	5.24805	42
0.38969	3.07922	138
0.0133927	4.69698	0
1.95999	0.649664	0
0.498576	5.56067	10
0.0698028	0.728487	16
0.281429	5.74196	20
0.160178	1.26575	11
0.235541	6.16963	25
0.743731	5.316	0
0.270757	0.548513	16
0.593518	4.00625	34
0.103144	1.07474	7
0.435626	6.22987	15
0.127116	5.80976	19
0.175336	0.76774	22
1.61758	0.504183	0
0.124858	5.14593	24
0.409206	5.90579	5
1.55654	0.901337	0
0.950966	5.93054	14
0.140339	3.17182	152
0.0542294	1.15939	21
1.94	0.0441755	0
0.324154	0.142985	12
0.0470441	1.81479	33
0.537873	1.88824	0
1.7046	5.95265	5
0.35931	5.97061	41
1.58787	4.10282	9
0.223176	0.58193	9
0.256276	3.80444	31
0.811047	0.329765	12
0.0302193	1.43272	9
0.0498959	4.45953	27
0.392993	5.59207	14
0.27521	0.451551	18
0.696402	6.00437	8
0.334022	5.54906	23
0.028821	4.85239	14
1.08239	0.316097	8
0.0453828	1.32024	16
0.396733	5.05404	0
0.0097809	4.80287	10
1.19155	5.60749	0
0.28343	5.98387	28
0.509326	5.81636	8
0.0535232	1.75798	47
0.0695277	1.16231	6
0.876829	5.75688	3
0.873254	2.52563	27
0.315643	3.32545	151
0.901589	0.956129	0
0.114417	5.16666	20
0.675744	6.15002	10
0.287453	0.461244	23
0.24578	3.35732	45
0.556858	0.411071	12
0.235754	0.12298	22
0.0768942	4.13253	50
1.04108	5.89848	9
0.180178	0.109001	25
0.00582764	1.57637	29
0.362545	5.55758	33
0.0388799	1.68389	16
1.78127	5.94821	0
0.241636	6.07585	31
0.0492508	4.5868	22
0.594483	5.12898	3
0.0551437	1.33888	9
0.0227377	4.58298	27
0.393782	6.17195	8
0.911026	6.15805	10
0.254882	6.2059	7
0.197351	5.30365	9
0.0747469	0.901232	13
1.73701	0.410938	3
0.315414	0.437441	6
0.242373	2.50086	87
0.392755	1.16401	9
0.073937	4.97555	20
0.156759	2.06018	26
1.10885	0.00969375	12
0.198321	3.2224	28
1.10316	0.944294	0
0.166605	4.36584	33
0.11867	1.26702	9
1.23719	0.0921548	3
0.640362	0.301863	15
0.117824	5.51193	17
1.22444	0.204436	8
0.36278	5.60176	23
1.19245	3.60815	36
0.266911	6.07363	26
1.50852	5.80033	0
0.222114	0.845949	11
1.67768	0.159896	2
0.0321644	4.22148	43
1.39167	3.65738	21
0.0502592	1.5044	7
0.00534921	4.70307	61
0.0197499	4.54803	33
0.058038	4.75704	5
0.052227	1.75885	28
0.267723	0.95403	14
0.240727	4.18687	23
1.05934	0.390403	5
0.367517	0.0227837	12
0.882542	5.15183	3
0.0482939	5.96993	10
0.513415	0.22901	22
0.29856	5.43329	7
1.67999	6.10823	0
0.0469092	4.84504	12
1.12785	0.189998	3
0.329561	0.681448	20
0.302863	5.30819	12
0.244318	2.02362	23
0.123773	5.01482	28
0.207088	1.93976	20
0.0871246	4.91922	39
0.0933097	0.896289	13
0.617696	5.74228	11
0.222489	2.50492	87
0.10851	5.09581	20
0.126023	0.698092	24
1.75089	0.101093	6
0.0656301	4.95762	22
1.24202	2.73733	11
0.4106	5.48429	14
0.146476	1.96129	30
0.125089	5.26198	20
0.669123	4.28723	6
0.153041	0.310207	18
0.135558	5.46737	11
0.250285	2.68933	120
0.0610452	5.09018	1
0.490307	0.397787	9
0.237512	6.1922	11
0.0913175	0.884371	21
0.0786465	0.828583	11
0.352686	5.53326	26
0.0905304	1.87733	56
0.164587	0.959408	9
0.204514	4.37602	4
0.49844	2.42923	51
0.164618	0.0319439	16
0.0244414	4.77752	14
1.04317	0.0897857	5
0.231208	5.97811	14
0.877106	5.45909	2
0.25494	0.254504	21
0.405166	0.480881	19
0.851174	0.183146	0
0.107728	2.09331	23
0.148739	5.33191	36
0.292004	0.472145	16
0.293937	5.22223	18
0.0709842	0.217217	7
0.705408	5.93963	8
0.121254	0.818443	15
1.68025	6.09107	0
0.961457	1.11141	3
0.295733	2.58308	104
0.303148	6.13617	27
0.311342	2.49053	116
0.11897	5.23007	26
0.091101	5.01651	17
1.56498	5.91922	3
0.133899	0.987916	17
0.00923806	4.87645	17
0.170835	4.00836	23
1.73107	6.21482	0
0.167952	0.117879	23
0.262029	3.44902	164
0.113354	6.14645	24
1.02549	5.71463	9
0.161285	0.343028	9
0.866195	2.31796	5
0.515213	5.63073	15
0.157381	0.542906	14
0.3445	4.89846	0
0.0269852	2.19397	65
0.0388901	1.65572	26
1.50684	6.28262	0
0.399692	5.76278	16
0.208694	2.6036	128
1.51618	0.453784	3
0.245004	1.00827	8
0.305306	6.02911	24
0.872627	5.63005	0
0.184368	0.593441	14
0.821079	5.9388	10
0.0488904	1.54717	9
1.72007	6.07772	0
0.134993	5.73444	48
1.44467	3.36236	48
0.0896189	1.01138	19
1.5331	3.76599	3
0.329188	1.01237	14
0.273587	6.08035	8
1.09627	0.0421324	0
0.632907	6.25458	11
0.444621	0.107345	9
0.180662	2.0183	75
1.15968	0.808491	0
0.292366	0.107567	15
0.230284	4.80444	0
0.329919	0.377057	10
1.35335	5.89239	0
0.759812	1.32041	0
0.24537	3.9348	110
0.199599	0.975267	5
0.176977	4.26461	63
0.0837994	4.80166	7
0.0976564	2.00292	35
0.456678	5.73755	20
0.0609168	3.15058	30
0.219002	6.04378	19
0.0142717	4.69946	0
0.130636	1.12675	23
1.98393	6.17371	3
0.195227	5.37551	23
1.73612	0.0768833	2
0.0439098	5.04181	30
0.579431	5.63808	9
0.167871	1.49601	5
0.0299229	4.69866	0
1.16684	3.41876	82
0.281466	6.02727	9
0.0579982	1.14121	9
0.777368	6.26619	6
0.0442659	5.01689	13
0.223856	5.70625	17
0.238758	2.14876	77
0.359842	5.55472	13
0.366635	0.0902938	22
0.0160178	4.74662	8
0.218609	0.32498	12
0.16358	3.15814	76
1.46318	5.4036	1
0.277871	0.670947	8
0.0512135	1.39693	9
0.203607	0.641366	5
1.48857	5.7934	0
0.299154	5.76613	20
0.163925	2.07593	59
1.05496	6.11999	3
0.819137	0.149813	17
0.400962	0.0515193	17
0.838262	0.00913913	5
0.039085	1.53811	3
0.452679	5.70218	30
0.0357293	1.3733	13
0.26708	5.05211	8
0.107611	0.0522287	15
0.549963	5.96738	9
1.80882	0.494289	0
0.0166416	4.61482	69
0.552954	5.50413	9
0.0731841	1.77423	31
0.544309	0.0693664	0
1.49363	6.2097	0
0.288422	4.57637	0
0.0946653	1.87115	29
1.48636	5.50504	3
0.128684	4.23745	60
0.201109	0.305944	11
0.573091	5.87625	10
0.0902619	1.25124	5
0.319212	0.104988	2
0.241507	4.04379	68
0.262703	0.534479	19
1.85145	0.821982	0
0.298972	5.7224	30
0.366389	0.199645	11
1.57239	0.268458	0
0.233673	5.51725	19
1.46288	5.71761	0
0.238175	0.0519822	5
0.0864762	1.96334	34
0.418628	5.04006	2
0.13408	0.00663	19
0.116553	1.29042	6
0.203662	0.429419	22
1.23679	0.62537	0
0.10939	5.89174	33
1.05532	6.21811	5
0.290313	0.482387	6
1.30616	0.448524	3
0.341953	5.87755	10
0.287277	2.18011	69
1.5662	5.76104	0
0.311636	5.9591	19
0.300424	6.13576	20
0.277536	0.338415	7
0.0618046	1.37435	7
0.0902848	4.53454	55
1.39105	0.319023	0
0.19825	0.894212	27
0.820573	5.58248	5
0.2568	2.30944	77
0.692682	5.72502	6
0.586248	2.5786	64
1.17725	6.26426	3
0.126162	4.39428	35
0.0810528	4.46955	22
0.244577	0.422809	13
1.41167	0.033709	0
1.09469	1.967	0
0.121717	4.12835	78
0.145541	1.23531	6
0.279745	0.721931	7
0.00599364	4.74293	16
0.205834	2.0752	38
1.66078	0.491961	0
0.0833111	4.98213	23
0.220045	5.37538	17
0.0844914	1.91831	57
0.151075	5.13053	11
1.10788	0.22994	10
0.246073	2.14647	50
0.256564	5.31079	27
0.289828	0.731268	28
0.0534124	4.86393	12
1.48779	5.41126	0
0.0483079	0.437934	8
0.656764	3.77325	124
0.312265	0.420872	8
0.461713	0.191561	11
0.10212	4.28835	102
1.11589	0.559108	0
0.20352	2.40618	72
1.23283	5.69865	0
0.384774	6.2111	19
0.134507	4.2291	34
0.444755	2.66073	152
0.125061	5.01871	28
0.150565	5.91267	14
0.0571513	1.7179	51
0.102103	6.25133	25
0.70591	5.35356	0
0.0116082	1.78493	124
0.306736	0.0835653	23
1.75976	0.568968	0
0.438619	0.263685	22
0.212448	2.52384	58
0.917092	5.7277	3
0.183137	1.21699	20
0.00511142	4.72335	20
0.0274246	1.53039	15
0.26744	2.56086	44
0.211269	5.22901	21
0.307225	5.3572	24
0.411117	5.37982	11
0.0934565	1.84999	27
0.130774	4.20438	56
0.833972	5.13599	0
0.16717	0.588297	10
0.261853	0.139427	13
1.46519	5.92826	0
0.0805677	5.27082	27
1.20975	5.87036	6
0.174078	0.245998	15
0.335522	1.31926	1
0.131222	4.36816	95
0.0290982	1.496	10
1.7182	6.16886	3
0.392545	6.19601	30
0.112522	4.99178	13
0.162235	0.192031	18
0.29967	3.88687	16
1.13041	0.826691	0
0.108068	0.573138	23
0.196725	0.485144	11
0.862748	6.2037	1
0.547631	6.12672	29
0.0740907	1.92941	55
0.203836	4.27487	41
0.045734	4.67391	9
1.06482	0.141217	2
0.538671	5.56269	13
0.179579	0.777775	16
1.94026	0.0159331	0
0.350621	0.589424	9
0.11742	4.83206	1
0.0628278	5.05551	17
0.77165	0.895069	1
0.193732	5.61592	25
0.0176051	4.69561	0
0.00380923	1.55762	12
0.110959	5.28825	9
1.77632	0.492519	3
0.268907	0.360865	8
0.897453	5.38573	0
0.173394	5.44913	10
0.474671	5.42576	13
0.0639715	1.44252	9
0.0910449	4.24357	8
0.812628	3.7735	74
0.283923	0.765946	12
0.353508	3.93036	83
0.161152	5.38926	17
0.874929	2.4749	27
0.262269	0.619356	11
0.046638	4.606	19
0.108025	0.0261063	9
0.205193	1.63455	0
0.00140191	1.576	16
0.0555266	5.08133	16
0.835751	1.08807	0
0.251431	5.49231	31
0.134757	5.4839	16
0.325784	2.89938	56
0.226878	0.150326	15
0.307862	6.03424	7
0.159611	4.37342	30
1.57264	3.65399	20
0.349655	3.68293	155
0.0649127	1.34195	16
1.32563	0.769685	0
0.446613	6.06061	27
0.0951418	4.54212	33
0.0155075	1.50765	15
0.0652056	5.07216	10
1.35519	0.0834526	8
0.207183	6.1973	22
0.0896788	6.26435	21
0.701747	5.50801	0
0.968032	0.226944	12
0.290632	5.51213	15
0.999719	4.18076	16
0.041688	1.29334	10
0.231633	0.0865185	22
0.443068	5.74038	18
0.0521931	1.84323	43
0.21167	1.97775	26
0.0805724	5.18497	23
0.833589	5.74511	9
0.0117944	4.85283	11
0.215426	6.15215	15
1.20838	6.28183	1
0.0579308	5.44317	27
0.329202	2.14487	29
0.210264	5.777	24
1.27231	2.31911	16
1.06846	5.84575	8
0.24286	4.27345	47
0.148319	1.19016	9
0.356899	5.24481	7
0.220549	6.25062	29
0.425831	1.30868	3
0.108924	4.95219	23
1.28376	6.05742	0
0.273396	6.01908	32
1.49384	6.06966	1
0.275939	3.08554	171
0.136719	5.15807	23
0.483653	1.22501	4
0.0427786	4.36699	46
1.18284	4.11199	0
0.4719	0.949402	7
0.0516029	4.57446	27
0.971756	0.084495	4
0.314768	0.345843	12
0.24584	1.99783	30
0.413349	6.07805	26
0.155129	0.484361	11
0.0756135	1.74861	9
0.22176	0.554854	26
0.220736	0.766876	13
0.230005	0.293472	16
0.10914	1.32526	9
0.708793	1.28191	0
0.0431872	4.60305	81
0.0752894	1.2813	8
1.77944	3.76937	0
0.170773	4.44212	32
0.223731	1.23023	15
1.90481	5.79575	0
0.165556	5.67061	22
0.441477	2.75484	108
0.141302	5.77227	18
0.101902	2.76662	65
0.488833	5.67415	26
0.184185	1.01487	5
0.171274	4.42496	38
0.232738	5.45056	21
0.194345	1.01305	2
0.166121	4.00667	124
0.052436	4.22353	36
0.447518	3.5758	148
0.0124568	1.54237	6
1.19411	6.03405	5
0.300763	5.81405	20
0.11662	1.14714	7
1.70805	5.67367	0
0.155077	1.90677	80
0.147624	5.0505	39
0.323791	3.26035	188
0.131486	1.20574	16
0.210206	4.39944	45
0.171794	0.821563	7
0.211086	5.10118	10
0.212	0.518183	7
0.258144	5.24787	12
0.0634344	1.79702	32
0.0561548	4.89705	15
0.826991	5.33384	0
0.247086	5.46875	17
0.345058	2.45356	71
1.62743	5.39813	0
0.168546	0.693011	12
0.0953319	4.97305	16
0.129563	4.92869	6
0.490013	5.41512	16
0.169889	5.98972	16
0.195415	5.08509	9
0.2899	2.71028	136
0.159621	5.70852	5
1.8294	5.9093	0
0.267482	5.95983	3
1.06739	3.91129	18
0.11369	2.01607	56
0.13007	1.86346	39
0.0387898	4.55461	23
0.0824797	1.22843	9
0.104433	4.99062	12
1.13794	3.88871	13
0.0342795	2.08777	28
1.0515	0.738507	2
0.194832	5.39921	10
0.118345	1.12245	2
1.7044	3.48718	16
0.177782	2.86944	114
0.086546	3.98383	8
0.613943	6.01083	8
0.43201	5.08226	3
0.218672	0.988021	17
0.0912298	4.56838	15
0.0695352	1.69047	17
0.176217	5.96721	8
0.100592	4.29649	16
0.81585	2.40387	9
0.262816	0.253435	3
0.438211	3.11257	147
0.0623908	5.01225	13

## Sheet: F
Polar distance (deg)	Polar angle	Firing rate (spikes/s)
1.64274	4.17289	59
0.319798	0.496134	224
0.0939943	4.01609	36
0.364262	0.864306	182
0.183942	5.18582	87
0.218349	4.99685	93
0.0617335	4.17234	195
0.219308	0.902411	148
0.0999688	5.0137	101
0.152024	4.19902	91
0.808701	3.08523	41
0.365686	0.251408	213
0.0819413	1.01318	163
0.324144	6.1373	278
0.502511	4.39018	77
0.105719	0.227579	168
0.935003	3.76124	117
0.0880921	3.21513	27
0.107489	2.06723	109
1.47627	3.58994	103
0.386739	3.6294	28
0.363237	3.97505	36
0.010202	1.54105	146
0.252316	0.923636	177
0.0878601	1.96336	65
1.82349	0.351905	298
0.0597641	1.38016	204
0.267404	4.91151	147
0.343299	1.68453	192
0.394611	0.0170261	251
1.85248	3.9552	41
0.0738664	6.06947	94
0.104568	0.21905	122
0.666808	5.31743	112
0.149707	2.68879	84
0.057466	1.78643	101
0.226467	3.89375	51
0.140661	2.17454	71
0.030544	4.63587	71
0.0763956	1.30373	133
0.0643566	4.95219	86
0.15307	1.43515	223
0.212298	2.25495	63
0.822744	0.920798	265
0.422154	0.00499274	273
0.154362	2.36938	56
1.13816	2.87799	85
0.538912	1.30342	245
0.0256648	1.7093	84
0.684856	2.93637	39
0.0112485	4.75402	177
0.0486518	1.44818	111
0.283138	2.07467	62
0.0339343	1.65842	71
0.905276	0.668089	255
3.02509e-05	1.57096	35
0.206922	0.923254	191
0.64468	2.71807	29
0.283827	6.20931	279
1.40181	3.29466	84
0.293308	3.03909	128
0.271911	0.341809	290
0.196259	1.37519	131
0.116675	3.78729	21
0.422619	0.638544	207
0.187012	3.53531	40
0.217375	1.26427	152
0.146406	1.98206	77
0.183091	0.306619	171
0.0176517	1.60817	99
0.0382361	4.58574	45
0.0949942	1.8987	72
0.0623154	4.83239	65
0.0901186	4.60489	48
0.000923511	1.56499	125
0.209866	0.709022	154
0.095351	2.44665	86
0.385277	2.3266	79
0.172528	4.07034	28
0.18764	1.86508	116
0.122272	1.98078	103
0.255087	4.99751	84
0.0314094	1.39896	233
0.766515	1.17512	245
0.0673827	1.40999	92
0.521321	1.85053	126
0.173794	0.710514	211
1.0587	2.77279	79
0.153498	1.41847	212
0.169267	4.48057	46
0.384883	1.94829	97
0.271293	1.39978	189
0.144153	4.60324	17
0.251915	1.94982	94
0.203313	4.16663	68
0.0741821	1.30015	97
0.92649	2.11241	94
0.127154	1.91013	62
1.91131	0.611084	257
0.263076	0.84457	180
0.0075854	4.80781	80
0.154396	1.50751	136
0.341673	2.09486	77
0.0144364	4.64509	101
1.36818	3.7697	122
0.124222	5.3051	107
0.346864	0.917109	192
0.0177748	4.81847	73
0.200398	1.70852	175
0.146857	0.611677	76
0.320082	3.16725	56
0.179895	0.461008	186
0.381223	0.532777	232
0.364986	3.53451	35
0.199394	4.88793	54
1.51905	3.57321	45
0.374791	0.29658	175
0.146745	2.30412	62
0.0550724	1.29628	127
0.029086	0.952441	51
0.21223	4.42515	44
0.0879381	1.7228	126
0.0420171	1.68688	148
0.107306	5.27518	52
0.433086	0.84428	159
0.329238	0.77563	297
0.0141681	4.73742	56
0.543803	0.0218149	274
0.834802	2.21046	134
0.105069	1.31706	212
0.568091	0.510108	235
0.136198	4.07843	48
0.500232	1.86177	177
0.156804	0.931655	190
0.284514	1.29734	260
0.357026	4.46463	66
0.0617806	3.46268	103
0.974908	6.23947	276
0.123095	0.47133	157
1.59825	0.918236	262
0.117484	6.20296	150
0.0200017	1.6269	154
0.268688	5.11131	125
0.110735	1.76808	125
0.2747	3.71862	38
0.00358349	1.55064	127
0.175982	4.49186	58
0.127234	5.16689	88
0.11584	1.82833	80
0.116153	5.32349	108
1.70604	6.09402	184
0.0592041	0.455021	249
0.255405	3.20563	51
0.567246	2.46711	103
0.129005	0.765902	168
0.0425652	4.79857	80
0.333529	4.96923	136
0.119132	4.96	109
0.789858	4.11351	80
0.0131536	1.47717	101
0.0315154	4.78325	63
0.0332872	1.66679	198
0.743111	2.4022	76
0.142201	2.17596	70
0.764789	2.46553	63
0.00177513	4.7229	117
0.34765	1.09201	200
0.312914	0.178334	235
1.48059	0.523235	294
0.216583	0.973141	206
0.10832	4.1263	57
0.462333	2.49963	118
0.00264817	1.55568	64
0.332802	1.24155	217
0.166663	2.95286	46
0.0384684	5.09119	223
0.306538	1.28866	278
0.18415	2.70167	71
0.421686	0.0142682	257
0.338476	1.28959	205
0.04184	1.65791	115
0.48421	0.983919	186
0.0735154	4.92782	85
0.0920627	1.99348	106
0.112323	2.73823	98
0.101884	1.42429	97
0.16519	2.37256	62
0.30984	3.66699	15
0.138599	0.685964	101
0.149407	4.24634	64
1.52695	2.2002	124
0.339346	2.50259	61
0.260359	4.25468	56
0.129609	0.78447	184
0.949978	2.58044	75
0.0968636	1.92166	71
0.111177	4.5847	77
0.0342788	3.75255	115
1.0674	3.70577	100
0.165686	1.33217	178
0.0359853	4.6533	56
1.28703	6.13847	208
0.353994	5.9761	282
0.0525305	1.95991	101
0.0403992	4.80963	59
0.0927429	2.06446	104
0.00791245	1.55766	135
0.0019285	1.6181	94
0.0757497	1.3119	97
0.0601051	1.78814	111
0.100913	5.8738	133
0.187285	3.4843	40
0.0195547	4.56733	209
0.10942	1.07469	161
0.857395	1.13023	253
0.293549	0.952165	163
0.284891	1.98524	64
0.0872115	3.73776	20
0.00318094	1.56022	148
0.260463	5.91502	261
0.111499	1.81505	74
0.361441	0.80409	193
0.280227	1.11619	222
0.1967	4.32544	38
0.150672	1.93692	71
0.0550945	4.48799	167
0.395688	5.86536	168
0.0600447	1.43696	129
0.201111	5.06748	144
1.10503	5.50812	182
0.306134	2.56152	68
0.312232	3.24884	26
0.0750045	2.22804	43
0.646449	3.89943	94
0.0810035	4.21074	60
1.62215	4.00595	47
0.0860421	4.16242	66
0.374439	2.56602	35
0.0185624	4.63869	62
0.128559	0.507777	210
0.0803573	4.56411	40
0.0910025	1.37757	178
0.0183028	4.66858	19
0.291464	6.09881	189
0.203234	4.26151	43
0.143063	1.75735	144
0.281489	2.93199	55
0.176681	5.28395	113
0.128777	5.97824	105
0.724012	6.18191	286
0.245823	0.418542	246
0.166206	4.04273	63
1.2259	4.24528	37
0.00161735	4.70912	77
0.0288355	1.46186	110
0.966012	5.422	179
0.0320686	1.41574	161
0.549877	1.20272	275
0.129235	4.2658	52
0.471776	5.13644	135
0.0733019	2.10944	104
0.284084	5.07034	132
0.125301	0.771487	189
0.744756	2.73548	83
0.0735974	4.99481	120
0.0282028	4.77911	25
0.206025	4.87453	103
0.151668	5.44386	120
0.174407	4.47489	73
0.0513634	4.426	77
0.171046	4.53153	74
0.20378	6.10598	204
1.06882	0.736928	274
0.0568224	1.74927	127
0.0162554	1.32243	127
0.688556	2.61851	90
0.0120794	4.74979	114
0.193377	1.00164	175
1.04898	2.93102	89
1.00843	3.66096	86
0.24105	3.4531	25
0.474177	2.65421	59
0.0618302	5.66226	97
0.786918	2.24782	104
0.197221	2.05109	83
0.528479	6.1218	241
0.00443744	4.67972	184
0.322697	3.63889	41
0.150027	0.451717	262
0.966649	3.48218	133
0.0550849	1.97979	81
0.239756	3.96987	60
0.702196	0.480907	224
0.0510615	0.840253	173
0.755379	2.65304	98
0.0230137	4.507	172
0.291335	0.13234	262
0.222474	2.94508	58
0.0781726	4.78715	118
0.0593931	0.435031	283
0.0962767	0.916632	262
0.753032	0.838004	306
0.263014	2.44607	57
0.852085	2.98892	67
0.352322	0.352534	243
0.943363	2.09708	182
0.163648	2.9602	39
0.135751	5.57763	136
0.918051	0.399147	230
0.0903924	6.1869	139
0.312714	2.91986	32
0.264775	0.447905	297
0.337886	3.56702	71
0.0907992	1.36392	118
0.545729	5.67555	169
0.343361	3.98331	51
0.169648	1.06706	198
0.102121	5.0056	130
0.029174	1.62871	126
0.0937126	4.39062	52
0.738566	3.40622	60
0.971971	3.01796	98
0.13333	0.519404	205
1.12417	5.62976	188
0.353367	0.213728	248
0.0924556	4.43027	52
0.388414	5.86609	156
0.358702	4.47571	58
0.170174	2.49118	92
0.0316892	1.68709	131
0.368951	1.09405	212
0.26135	1.22631	198
1.20616	0.781872	280
0.0397391	4.88717	92
1.77736	2.98766	129
0.0160594	5.05355	120
0.387018	3.57261	43
0.279055	0.268264	254
0.16512	6.26386	65
0.971969	5.53123	168
0.0115507	4.74862	102
0.168059	1.01688	138
0.551392	5.98633	210
0.69392	2.28261	84
0.18766	2.13729	72
0.0628227	4.49236	154
0.359974	0.573978	234
0.28602	4.93815	103
0.326425	2.24031	39
0.201248	5.54064	79
0.722464	1.19828	272
0.198386	3.84014	28
0.0446259	2.17215	211
0.211889	5.91303	242
0.495279	4.08868	44
0.00573694	2.0327	93
0.318873	5.77714	217
1.00803	5.85888	160
0.0497614	4.22361	91
0.353265	0.464163	290
1.31032	0.50145	266
0.0176824	1.52147	165
0.339161	1.93056	106
0.178231	1.16497	250
1.82935	2.56645	151
0.377078	2.91869	45
0.188293	0.584829	247
0.160725	1.11009	108
0.45018	5.7716	166
0.0514383	4.48301	39
0.0786494	1.89678	107
0.0681723	1.70008	136
0.19362	0.724257	243
0.128116	1.21447	100
0.192276	1.12364	241
0.123581	4.5452	36
0.271904	0.699141	146
1.65961	3.89564	58
0.179813	3.85045	39
0.820803	1.06688	262
0.00775399	1.55411	79
0.0139326	4.98939	140
0.0951107	5.1998	220
0.00570472	5.93465	155
0.206619	0.894308	116
0.577604	1.26838	254
0.00702656	1.53874	161
1.01587	3.16576	41
0.323845	6.23173	250
0.0922738	1.86252	89
0.493098	4.03482	55
0.0152754	1.66606	150
0.190228	0.861517	227
1.55401	6.02507	284
0.305826	5.57344	168
0.045906	4.57486	47
0.00890216	1.54099	131
0.234565	5.29265	166
0.233079	0.951414	154
0.141203	3.16827	64
0.0698884	5.72205	144
0.444909	0.649348	213
0.199477	6.11124	181
0.117718	5.71249	93
0.495313	3.83366	82
0.0382915	4.6836	87
0.0946481	5.28049	112
0.542229	3.72755	39
0.0944132	5.51316	225
0.228905	4.4042	74
0.133421	4.43534	29
0.00488939	4.70524	59
0.0272619	4.83907	137
0.691203	2.39654	95
0.218164	2.37903	64
0.954952	2.28789	111
0.0244775	1.66481	123
0.22903	0.284882	160
0.75556	3.68864	45
0.207173	1.18571	197
0.125376	1.8369	111
0.0906787	1.16311	198
0.945189	0.550342	262
0.0271771	5.65759	93
0.597283	1.07221	250
0.160321	4.3912	47
0.0849428	0.322956	182
0.120825	1.3805	88
0.435346	0.854557	225
1.93119	3.93556	63
0.166499	2.15494	178
0.0876334	4.14919	43
0.110092	1.85785	83
0.501757	5.10806	97
0.0289853	2.30661	151
1.08711	5.58003	203
0.21169	0.0521987	277
0.966989	0.660937	236
0.233855	2.63135	111
0.0381862	5.01514	87
0.666352	0.463528	265
0.026784	4.66876	142
0.18088	1.32224	170
0.00439193	4.70174	86
0.531696	0.00693551	222
0.262092	6.24418	286
0.349786	4.96606	128
0.0574902	1.24392	207
0.0328659	4.90465	116
0.919296	3.74334	80
0.237632	3.10095	70
1.67972	5.62565	169
0.0299923	5.02052	241
0.982159	6.2569	231
0.188797	0.247444	232
0.137478	4.42312	45
0.106994	0.526022	215
1.091	2.59976	61
0.0247962	5.81349	79
1.05807	2.95987	141
0.0747574	4.39575	45
0.0909213	1.26919	145
1.31874	3.66748	105
0.122099	2.28003	33
0.407744	4.24805	48
0.0351004	0.485225	175
0.0659377	1.6161	194
0.449613	0.729264	251
0.0908647	1.12681	150
0.379194	2.8827	53
0.143914	0.38785	194
1.07025	3.56669	108
0.111406	1.15633	119
0.0505803	4.49201	62
0.368737	5.75974	180
0.0338901	2.44087	128
0.10248	1.77774	130
0.0263202	4.75087	58
0.198729	1.1482	168
0.103672	4.15896	23
0.00124522	1.64101	81
0.656749	2.57277	134
0.148543	2.00249	57
0.230143	0.987372	138
0.285879	0.259655	252
0.685052	0.697465	332
0.0947321	0.708527	208
0.525063	3.28043	65
0.026049	1.54342	233
0.0759413	4.81286	101
1.18793	2.3745	135
0.0370904	1.34489	92
1.64808	3.30399	78
0.0708382	2.25301	66
0.0403382	4.57692	61
0.0134911	4.68675	50
0.0510298	1.44346	104
0.00522107	1.57384	211
0.0535658	4.97432	89
0.266366	0.79982	240
0.0680437	4.2142	39
0.900495	5.89693	263
0.382153	5.91344	219
0.398297	2.89188	34
0.53667	3.98124	93
0.976679	0.520832	271
0.224939	1.94202	107
0.0476993	2.03569	47
0.103356	1.77342	86
0.0163102	4.78894	85
0.254452	4.21263	59
0.0277683	1.7614	113
0.112207	1.3995	123
0.0880677	3.60682	90
0.050215	1.63304	157
0.393586	3.38129	60
0.196306	0.567434	225
0.181885	1.45163	242
0.24283	2.17839	55
0.0917234	6.18713	73
0.425577	2.78431	38
0.103213	1.97117	131
0.927001	5.9522	235
0.154058	2.44021	63
0.600223	4.36557	65
0.0512711	5.46223	44
0.819382	6.02321	214
0.302204	0.505053	301
0.316649	3.3816	38
0.628028	6.2416	239
0.143702	0.552	263
0.166513	1.3708	215
0.431565	4.39918	99
0.0535946	4.57586	62
0.0429356	1.74287	162
0.333752	4.03251	22
0.0862712	4.23625	65
0.27575	2.19797	76
1.75112	3.212	145
1.39579	4.23841	58
0.200411	5.72954	124
0.0947554	1.46309	258
0.369653	4.25532	94
1.45078	5.35861	217
0.457798	6.00748	230
0.170215	2.92377	59
1.07422	4.14675	73
0.00194685	1.20965	112
0.0263849	1.65123	98
0.690366	4.06403	85
0.177076	1.32796	194
0.101118	4.52799	36
0.26073	2.11047	58
0.227684	0.886459	269
0.364488	5.03984	141
0.127405	1.24359	154
0.236828	1.2197	179
0.179186	4.40787	50
0.383614	4.86712	60
0.151056	1.37954	186
0.231541	5.01596	174
0.147303	0.5973	196
1.21635	3.88225	113
0.192722	6.248	257
0.00240535	1.57988	136
0.133553	5.097	78
0.140057	4.27162	85
0.23205	3.58859	30
0.0612605	5.60292	130
1.33054	0.411782	289
0.042233	4.83448	119
0.0384955	1.81885	110
0.93643	0.95181	322
0.151343	4.42109	55
0.54239	4.12764	138
0.0628814	4.81765	88
0.129915	1.78371	86
0.377539	3.69506	22
0.0262569	1.42616	104
1.29392	0.912226	290
0.305999	0.989868	148
0.0715504	5.25113	109
1.56217	0.949956	290
0.0469649	1.32317	143
0.100801	4.45919	93
0.291351	1.03763	186
0.0673565	0.988221	67
0.943991	0.580315	303
0.00835003	4.74334	67
0.0269188	4.93395	96
0.97419	3.44365	88
0.0200183	1.52658	250
0.189165	4.62011	86
0.440661	2.47781	72
0.176498	5.13403	148
1.01549	0.601634	280
0.523133	2.62157	95
0.270524	0.433397	293
0.0106732	4.68484	84
0.021705	4.56588	104
0.642538	0.0195101	233
0.0512073	4.86551	129
0.0675506	1.40201	113
1.86049	2.93103	125
0.205927	2.28999	106
0.126718	3.72655	58
0.0761777	1.44975	191
0.19021	3.63739	113
0.891621	5.66163	167
0.0976987	4.41815	116
0.11622	1.30885	190
0.00197369	4.71843	65
0.228994	4.04137	38
1.98887	3.43069	140
0.160383	4.18932	44
0.235878	0.381137	200
0.247971	4.63246	84
0.219075	3.63157	28
0.444126	0.284997	273
0.94976	0.614841	303
0.00678139	4.74573	155
1.91433	3.85076	88
0.0628134	4.52703	43
0.461752	3.9679	72
0.191594	2.95444	46
0.0930292	0.105933	202
0.460599	5.19258	145
0.310327	5.79529	262
0.0810081	1.85614	143
0.05493	4.02811	35
0.146518	1.38341	236
0.91841	4.05838	97
0.451326	2.4285	49
0.157967	4.99123	97
0.101465	2.19904	75
0.302255	1.09597	141
0.147076	1.08285	203
0.120103	5.98666	82
1.09086	3.49011	118
0.211111	2.00561	75
0.0340833	0.6405	124
1.94338	0.105271	254
0.0320132	4.63795	172
0.229539	1.13326	180
0.892855	0.616239	272
0.0691992	5.99036	103
0.298317	3.98065	95
0.387735	0.184611	297
0.0811289	0.507619	96
0.554843	4.3686	77
0.181586	4.13632	65
0.105041	2.0727	67
0.791721	2.54351	70
0.115505	4.48225	91
0.00416419	4.72491	42
0.0114088	4.49317	158
0.190765	5.94411	315
1.07076	0.32892	294
0.340378	1.28159	174
0.34277	2.9061	10
0.0473219	6.27155	141
0.530319	6.09784	220
0.197717	2.51743	60
0.0973782	5.07159	170
0.0550134	4.43818	45
0.297038	1.38994	225
0.100263	4.22947	40
0.0597553	2.29962	153
0.964438	5.96899	207
0.105886	5.77289	186
0.394158	4.43142	75
0.36016	3.04562	31
0.271285	6.05166	275
0.820843	3.10921	25
0.165137	0.205565	232
0.0963246	5.3417	126
0.937145	2.77207	45
0.10819	5.05302	122
1.93767	0.937263	228
0.491747	0.646162	235
0.113419	1.99788	121
1.19348	5.19767	102
0.225447	6.28279	190
0.125102	5.12847	124
0.0946122	1.33062	140
1.32328	3.9073	98
0.147718	2.48247	65
0.100601	3.79965	63
0.0912335	4.42371	63
0.122424	1.97944	54
0.438484	0.474395	253
0.179101	5.99923	235
1.53492	2.8385	84
0.370411	6.03119	229
0.19794	3.8987	37
0.0239508	1.41197	183
0.653395	6.17328	283
0.136585	1.19617	215
0.0579159	4.4081	54
0.916773	3.84544	63
0.0324385	4.09667	110
0.00156057	4.71362	88
0.0213416	3.90075	191
0.199875	1.06177	209
0.228563	0.955276	161
0.0597145	0.809232	171
0.398272	3.76229	12
0.065177	1.47074	187
0.0139391	1.80486	166
0.107753	1.1892	183
0.711827	5.75434	223
0.195626	5.77201	135
0.452895	6.01682	254
0.407713	4.0636	38
0.0316453	4.6104	59
0.0155332	5.99184	195
0.540764	5.24186	159
0.190805	5.20739	130
1.12273	5.62908	183
0.031215	4.61833	78
0.523165	0.817771	241
0.244564	0.483364	204
0.0730557	1.91531	84
0.178566	1.09889	154
0.14453	0.852454	261
1.8811	3.643	87
0.117384	4.15007	194
0.191682	1.04751	180
1.4104	3.31047	105
0.0997853	0.00870029	95
0.690708	2.51112	76
0.208279	3.54864	36
0.33044	4.23776	80
0.0994571	0.92484	172
1.23587	4.12264	64
0.0997813	5.04883	44
0.0767883	1.80522	96
0.87714	5.53333	240
0.0400022	4.56103	95
0.379834	2.6075	54
0.163163	3.5251	94
0.265997	0.301031	251
0.63209	5.69078	221
0.147369	4.33104	40
0.139396	1.02236	175
0.24575	4.27971	25
0.0883251	2.70869	132
0.865724	5.3125	179
0.382867	4.14434	46
1.80731	0.2719	312
0.521622	5.87747	233
0.0213459	1.55003	203
0.0961612	1.81244	74
0.504838	3.33736	59
1.02031	0.923859	259
0.0482654	1.34047	174
1.54707	4.00779	78
0.0059331	1.55535	133
0.629557	5.2182	173
0.186903	2.49054	73
0.158047	2.90871	69
0.253575	5.73466	204
0.694116	0.743282	277
0.330131	4.39928	32
0.078212	3.68125	82
0.131341	1.80196	108
0.259711	4.51595	48
0.0193837	4.61579	144
0.216393	0.98914	168
0.394861	5.32863	101
0.119972	3.30612	163
0.209472	1.01779	164
1.48209	2.25523	93
0.378069	4.20422	9
0.115789	1.18827	266
0.77442	5.42887	189
0.310899	5.46067	179
0.1139	1.90672	69
0.489233	5.85368	173
0.0674687	1.44579	107
0.0477556	1.36274	64
0.509084	4.35077	92
0.248831	3.16741	57
1.01118	5.98653	233
0.232682	0.223446	92
0.726907	4.15335	60
0.450774	4.55778	100
0.266393	2.40262	60
0.184157	2.32176	71
1.23455	2.65562	127
0.43054	3.20943	45
0.224447	0.113596	239
0.368435	4.12464	44
0.0457219	1.02462	183
1.00588	2.55693	99
0.257589	4.18663	71
0.00454968	4.72281	69
0.232242	2.79749	82
0.102722	1.29258	167
0.0385831	4.4476	68
0.713465	6.25597	254
0.37451	5.72507	172
0.160647	3.7499	150
0.304601	0.462223	227
0.863376	5.79793	126
0.138783	5.70596	63
0.66588	2.02914	113
0.131407	0.945007	182
1.47802	4.40774	49
0.0123899	1.75536	141
0.112768	3.49145	60
1.05032	6.12216	222
0.0197586	4.57409	101
0.0353317	1.79031	140
0.279912	5.92674	248
0.273066	2.86939	37
0.266188	0.36301	248
0.241778	2.30448	53
1.33848	6.14167	197
1.17481	5.37456	232
0.192478	0.820598	240
0.969354	0.419451	249
0.0892989	3.98103	54
0.215468	4.64439	56
0.104222	4.17064	31
0.423756	0.682552	246
0.300119	0.369401	212
0.628771	1.22302	256
0.138787	2.56433	34
0.652374	3.92884	28
0.230643	0.942797	156
0.0646288	1.45455	198
0.305324	1.88055	109
0.130389	3.81989	43
0.307099	3.4208	120
0.603834	5.21934	134
0.138766	6.10061	259
0.245819	4.55022	73
0.343095	5.99241	236
0.337745	2.61764	47
0.319039	4.05035	48
0.0240562	5.45926	105
1.22192	3.72755	108
0.0293505	4.81236	103
0.0355173	1.80288	126
0.922387	4.27624	117
0.0561444	4.96481	161
0.802934	0.791879	252
0.189273	1.75855	130
0.004988	1.55505	116
0.0237417	4.83716	44
0.301049	4.01475	31
0.10725	0.824918	226
0.223233	1.15177	258
0.278681	4.54273	86
0.433964	4.25415	51
0.125138	5.14133	59
0.175203	2.24512	82
0.194829	0.472524	131
0.13656	2.10306	144
1.07389	3.67485	63
0.148056	0.480269	244
0.00387481	4.70166	64
0.0682841	1.7816	123
0.495272	6.10375	238
0.164854	1.39602	209
0.0609276	4.55917	33
0.848186	3.46017	72
0.170878	0.922301	93
0.144557	4.38325	34
0.75527	3.18233	110
0.0291224	4.80895	119
0.687379	0.0293514	274
0.0744182	4.50345	121
0.181543	1.11008	140
0.78381	6.20925	246
0.16786	3.23233	69
1.80754	3.5613	144
0.12636	4.14293	58
0.0202146	1.66595	113
1.16526	6.2659	309
0.202202	0.607219	244
0.222764	1.98454	51
0.306068	3.27016	63
0.53204	5.46253	251
0.189244	4.30084	111
0.42508	4.40049	66
0.333225	4.15809	17
0.118344	1.25671	120
0.0177155	1.19579	232
0.443573	2.13133	90
0.0916797	4.38259	36
1.04963	4.25197	69
0.317179	2.57424	79
0.286938	1.80248	144
0.061709	4.32246	109
0.173772	0.889481	182
0.635865	0.0485108	247
0.189447	0.129523	240
1.33946	0.30204	241
0.182262	4.97311	123
0.123885	4.57694	66
0.747535	4.2969	74
0.0130837	1.93763	175
0.202758	0.757431	229
0.703839	4.18589	88
0.0879462	4.03376	70
0.124743	4.56819	85
0.23042	1.13806	273
0.157093	1.70287	235
0.0338809	1.39686	132
0.40666	3.87289	64
0.342219	2.35139	74
0.0736973	4.35483	111
0.306192	0.606976	308
0.402773	5.66149	220
0.514665	3.66749	45
0.238048	1.07709	142
0.0342683	4.81113	103
0.324169	2.24371	86
0.20466	4.53566	61
0.0217198	1.40297	79
0.758783	6.16512	227
0.32796	0.554283	148
0.27736	5.30673	113
0.0787774	1.30768	132
0.0911667	1.44299	181
0.0208298	1.47098	165
1.40471	2.92799	125
0.282692	6.14309	249
0.082023	1.37625	190
0.97311	0.579153	277
0.143731	1.30593	214
0.57389	6.07709	291
0.205209	5.63083	88
0.239216	2.41245	82
0.813666	5.67409	230
0.306651	3.01648	51
0.269969	1.32485	217
0.0166272	1.50587	185
0.211089	0.395808	123
0.469674	0.478827	215
0.195997	0.0389169	232
0.0111877	4.64398	139
0.314178	3.58558	50
1.60945	5.72699	175
0.0235952	4.61271	112
0.504846	2.89063	57
0.323354	4.2061	46
0.0311493	1.49884	247
0.0190821	4.69925	109
0.233813	1.33382	231
0.148637	4.5493	27
0.472821	5.1989	185
0.130385	0.7206	202
0.762256	6.03018	198
0.0810879	3.87755	78
0.466014	6.20286	269
0.0353077	1.80362	131
0.449229	2.39832	33
0.164875	4.2272	73
0.112765	1.2774	214
0.541795	3.71968	33
0.074342	5.20357	112
1.55739	5.76208	170
0.394823	0.326709	166
0.142338	4.52897	99
0.375715	5.82201	224
0.380224	4.11674	47
0.940246	3.1953	91
0.241285	3.63692	48
0.0211808	4.60956	34
0.165563	5.20323	128
0.0406615	6.25651	174
0.376336	2.61626	105
0.849136	5.89392	259
0.0217415	4.42241	163
0.364549	5.3624	118
0.0331314	4.45141	134
0.116739	0.969777	197
0.809433	3.04156	56
0.066165	4.3962	51
0.319535	5.19863	122
0.213256	4.56236	59
0.00619093	4.79052	142
0.332284	5.19395	132
0.0823654	2.4109	69
0.316341	4.98311	89
0.300991	3.57395	56
0.0443738	1.4687	251
0.772363	5.22905	113
0.0249472	1.69074	92
0.292562	1.97661	121
0.0522618	1.77296	47
0.323931	3.59116	37
0.918657	5.85715	228
0.0683183	4.20758	158
1.6539	3.05484	150
0.43503	3.19887	59
0.0869998	5.40211	85
1.12506	0.70192	292
0.701037	2.98086	85
0.0441447	1.99127	178
1.52355	3.70966	146
0.19143	5.66439	205
0.0639159	1.43203	135
0.156413	4.3374	68
1.68827	3.51503	94
0.170841	3.42652	52
0.0400579	1.31015	248
0.0379278	4.83263	123
0.16562	4.40726	70
0.0329188	5.07602	133
1.93224	3.16253	177
0.187807	0.662299	271
0.153176	1.35897	151
0.186761	0.628329	225
0.103911	4.60709	64
0.0595205	1.2961	140
0.376621	3.28711	34
0.0699439	1.13223	217
1.26077	0.41273	308
0.92995	3.39407	59
0.254278	3.6555	18
0.062891	2.91244	208
0.397069	4.34966	36
0.0547974	4.4528	85
0.676395	4.31688	57
0.372351	5.88889	239
0.187829	2.5351	49
0.821545	0.391899	243
0.00393426	4.75155	11
0.361556	0.776257	187
1.01849	0.166956	271
0.175499	1.18557	256
0.0938489	5.48207	77
0.284672	5.86139	191
0.211449	1.40828	212
0.211471	4.55102	70
0.846902	3.79124	116
0.156579	0.231755	266
1.00883	0.946737	264
0.298736	0.688493	277
0.300699	3.64945	36
0.351192	0.813097	175
0.12586	1.27437	220
0.00717154	4.75497	57

## Sheet: B
Time (ms)	Mean value (spikes/s)	Upper s.e.m. value (spikes/s)	Lower s.e.m. (spikes/s)
-50	42.6163	46.7035	38.529
-49	42.8686	46.9768	38.7604
-48	43.1159	47.2454	38.9864
-47	43.4241	47.5884	39.2598
-46	43.7702	47.976	39.5644
-45	44.1048	48.3576	39.852
-44	44.447	48.7501	40.144
-43	44.8506	49.2168	40.4843
-42	45.2883	49.7249	40.8518
-41	45.7372	50.2464	41.228
-40	46.1989	50.7869	41.6108
-39	46.7108	51.3875	42.0341
-38	47.2574	52.0256	42.4891
-37	47.8411	52.7052	42.977
-36	48.4724	53.437	43.5077
-35	49.1002	54.1627	44.0376
-34	49.8046	54.9758	44.6334
-33	50.5803	55.8628	45.2978
-32	51.3678	56.7654	45.9702
-31	52.2212	57.7368	46.7056
-30	53.1758	58.8259	47.5258
-29	54.1917	59.9703	48.4132
-28	55.2778	61.1906	49.365
-27	56.5002	62.566	50.4344
-26	57.7882	63.9995	51.5768
-25	59.2044	65.5712	52.8376
-24	60.7419	67.2645	54.2193
-23	62.3946	69.0737	55.7156
-22	64.1976	71.0486	57.3466
-21	66.1	73.1151	59.0849
-20	68.0945	75.2748	60.9142
-19	70.2171	77.5692	62.8651
-18	72.4671	79.9887	64.9456
-17	74.7574	82.4451	67.0698
-16	77.1556	85.0043	69.3069
-15	79.6219	87.6371	71.6068
-14	82.1329	90.3148	73.951
-13	84.7009	93.0544	76.3473
-12	87.1975	95.7182	78.6767
-11	89.7151	98.3969	81.0333
-10	92.1773	101.026	83.3283
-9	94.5337	103.543	85.5239
-8	96.8112	105.978	87.6443
-7	98.9898	108.31	89.6696
-6	101.028	110.496	91.5609
-5	102.943	112.554	93.3311
-4	104.678	114.421	94.9357
-3	106.261	116.127	96.3963
-2	107.758	117.737	97.7799
-1	109.054	119.127	98.9818
0	110.167	120.319	100.015
1	111.122	121.337	100.908
2	111.946	122.206	101.686
3	112.669	122.96	102.377
4	113.298	123.602	102.995
5	113.824	124.123	103.525
6	114.24	124.52	103.96
7	114.664	124.905	104.422
8	114.997	125.186	104.808
9	115.258	125.382	105.134
10	115.567	125.615	105.519
11	115.84	125.805	105.876
12	116.108	125.981	106.236
13	116.324	126.091	106.557
14	116.627	126.288	106.965
15	116.915	126.461	107.37
16	117.186	126.613	107.759
17	117.446	126.74	108.151
18	117.68	126.843	108.517
19	117.89	126.922	108.859
20	118.049	126.94	109.159
21	118.166	126.917	109.415
22	118.243	126.852	109.633
23	118.191	126.646	109.737
24	118.091	126.393	109.789
25	117.815	125.954	109.676
26	117.439	125.414	109.463
27	116.946	124.747	109.145
28	116.317	123.943	108.692
29	115.523	122.964	108.081
30	114.608	121.86	107.356
31	113.563	120.624	106.502
32	112.362	119.222	105.501
33	111.042	117.699	104.385
34	109.612	116.062	103.162
35	108.01	114.246	101.775
36	106.279	112.296	100.261
37	104.452	110.248	98.6571
38	102.582	108.161	97.0032
39	100.623	105.98	95.2669
40	98.576	103.717	93.4355
41	96.4872	101.415	91.5595
42	94.359	99.0804	89.6376
43	92.2191	96.7423	87.696
44	90.0412	94.3726	85.7099
45	87.8357	91.9856	83.6858
46	85.6194	89.5986	81.6403
47	83.4962	87.3194	79.673
48	81.3416	85.0281	77.6551
49	79.2382	82.807	75.6694
50	77.2059	80.6733	73.7385

## Sheet: G
Time (ms)	Mean value (spikes/s)	Upper s.e.m. value (spikes/s)	Lower s.e.m. (spikes/s)
-50	116.878	119.441	114.314
-49	117.624	120.199	115.048
-48	118.461	121.05	115.871
-47	119.398	122.006	116.79
-46	120.432	123.062	117.803
-45	121.544	124.196	118.892
-44	122.758	125.436	120.081
-43	124.048	126.754	121.342
-42	125.418	128.152	122.683
-41	126.904	129.669	124.139
-40	128.459	131.254	125.664
-39	130.152	132.981	127.323
-38	131.923	134.785	129.06
-37	133.807	136.704	130.909
-36	135.837	138.773	132.9
-35	137.989	140.966	135.012
-34	140.318	143.34	137.295
-33	142.746	145.821	139.671
-32	145.38	148.51	142.249
-31	148.172	151.366	144.977
-30	151.132	154.399	147.865
-29	154.303	157.653	150.953
-28	157.655	161.096	154.215
-27	161.181	164.723	157.638
-26	164.96	168.615	161.305
-25	168.925	172.7	165.15
-24	173.091	176.998	169.185
-23	177.452	181.499	173.404
-22	182.015	186.213	177.816
-21	186.792	191.147	182.437
-20	191.747	196.268	187.226
-19	196.912	201.606	192.219
-18	202.216	207.087	197.345
-17	207.703	212.754	202.653
-16	213.335	218.571	208.1
-15	219.114	224.534	213.694
-14	224.954	230.558	219.351
-13	230.914	236.698	225.129
-12	236.939	242.898	230.98
-11	242.974	249.103	236.846
-10	249.04	255.329	242.752
-9	255.06	261.498	248.621
-8	261.001	267.578	254.423
-7	266.826	273.527	260.125
-6	272.493	279.304	265.683
-5	277.932	284.84	271.025
-4	283.152	290.139	276.164
-3	288.042	295.092	280.992
-2	292.581	299.679	285.483
-1	296.736	303.869	289.604
0	300.445	307.597	293.293
1	303.68	310.841	296.519
2	306.373	313.534	299.213
3	308.521	315.673	301.369
4	310.103	317.242	302.964
5	311.08	318.203	303.957
6	311.424	318.527	304.321
7	311.14	318.225	304.055
8	310.202	317.272	303.131
9	308.656	315.715	301.597
10	306.488	313.539	299.436
11	303.689	310.738	296.641
12	300.315	307.365	293.266
13	296.383	303.438	289.329
14	291.916	298.977	284.854
15	286.936	294.006	279.866
16	281.531	288.607	274.455
17	275.72	282.801	268.639
18	269.512	276.595	262.43
19	262.999	270.079	255.918
20	256.191	263.265	249.117
21	249.16	256.221	242.099
22	241.946	248.988	234.904
23	234.562	241.577	227.548
24	227.091	234.071	220.112
25	219.541	226.478	212.604
26	212.034	218.919	205.149
27	204.5	211.325	197.674
28	197.073	203.83	190.316
29	189.72	196.4	183.041
30	182.498	189.089	175.906
31	175.451	181.945	168.957
32	168.619	175.007	162.232
33	161.945	168.216	155.674
34	155.535	161.68	149.39
35	149.353	155.365	143.342
36	143.467	149.337	137.597
37	137.847	143.568	132.126
38	132.499	138.062	126.937
39	127.447	132.849	122.045
40	122.688	127.924	117.452
41	118.235	123.301	113.17
42	114.045	118.939	109.151
43	110.16	114.885	105.435
44	106.547	111.1	101.993
45	103.238	107.624	98.8507
46	100.153	104.376	95.9299
47	97.3209	101.386	93.2559
48	94.7275	98.6401	90.8148
49	92.316	96.0835	88.5485
50	90.0971	93.7274	86.4669

## Sheet: C
Time (ms)	Mean value (blue)	Upper s.e.m. value (blue)	Lower s.e.m. (blue)	Mean value (light blue)	Upper s.e.m. value (light blue)	Lower s.e.m. (light blue)
-50	38.8226	41.0288	36.6163	44.4999	47.4557	41.5442
-49	38.8916	41.1086	36.6746	44.2497	47.1662	41.3331
-48	39.0082	41.2372	36.7792	44.0095	46.8895	41.1295
-47	39.1078	41.3477	36.8679	43.7854	46.6275	40.9433
-46	39.24	41.4912	36.9888	43.5547	46.359	40.7503
-45	39.3771	41.6385	37.1158	43.3684	46.1325	40.6044
-44	39.5078	41.7794	37.2362	43.1902	45.9116	40.4687
-43	39.6525	41.9325	37.3725	43.0182	45.6968	40.3395
-42	39.797	42.0849	37.509	42.8526	45.4858	40.2194
-41	39.9373	42.229	37.6455	42.6704	45.2548	40.086
-40	40.0532	42.3469	37.7596	42.5057	45.0414	39.9701
-39	40.1643	42.4594	37.8691	42.323	44.8115	39.8345
-38	40.2581	42.5514	37.9648	42.1555	44.5949	39.7161
-37	40.3538	42.6412	38.0664	41.9822	44.3754	39.589
-36	40.4421	42.7226	38.1616	41.7884	44.137	39.4399
-35	40.494	42.765	38.223	41.5919	43.8986	39.2852
-34	40.5189	42.7793	38.2585	41.3789	43.646	39.1117
-33	40.5441	42.7911	38.297	41.1488	43.3813	38.9162
-32	40.5556	42.7896	38.3216	40.9102	43.1115	38.7088
-31	40.5686	42.7917	38.3455	40.6476	42.8228	38.4723
-30	40.5518	42.761	38.3426	40.4015	42.5526	38.2504
-29	40.5288	42.7259	38.3317	40.1431	42.2727	38.0136
-28	40.5039	42.6876	38.3202	39.8792	41.9906	37.7679
-27	40.4676	42.6394	38.2958	39.6234	41.7193	37.5275
-26	40.4056	42.568	38.2431	39.3645	41.4443	37.2848
-25	40.3667	42.5189	38.2145	39.1224	41.1875	37.0573
-24	40.3163	42.4578	38.1748	38.8974	40.9481	36.8466
-23	40.2672	42.3979	38.1366	38.6973	40.7319	36.6627
-22	40.2314	42.3524	38.1103	38.5085	40.5301	36.4869
-21	40.1676	42.2761	38.059	38.306	40.3135	36.2984
-20	40.1027	42.1993	38.0061	38.1522	40.1469	36.1574
-19	40.0651	42.1513	37.9788	38.0272	40.0089	36.0455
-18	40.0024	42.0782	37.9266	37.9151	39.8838	35.9463
-17	39.9298	41.9956	37.864	37.8051	39.7627	35.8474
-16	39.853	41.9069	37.799	37.7024	39.6496	35.7551
-15	39.7592	41.8026	37.7158	37.6152	39.5536	35.6769
-14	39.6556	41.6892	37.622	37.5069	39.4358	35.5781
-13	39.5488	41.5703	37.5274	37.3944	39.313	35.4758
-12	39.4271	41.4379	37.4164	37.2846	39.1925	35.3766
-11	39.2817	41.285	37.2784	37.1537	39.0511	35.2562
-10	39.1235	41.1166	37.1304	36.9806	38.8648	35.0964
-9	38.9724	40.9546	36.9902	36.7979	38.6693	34.9266
-8	38.7844	40.7546	36.8142	36.5935	38.4503	34.7367
-7	38.5686	40.5258	36.6114	36.3444	38.1849	34.504
-6	38.3546	40.2983	36.4109	36.0773	37.9003	34.2544
-5	38.1617	40.0935	36.2299	35.8035	37.6099	33.9972
-4	37.9507	39.8658	36.0356	35.489	37.2816	33.6963
-3	37.727	39.6237	35.8304	35.1652	36.9436	33.3867
-2	37.5189	39.3955	35.6424	34.8571	36.6231	33.0911
-1	37.3172	39.1723	35.4621	34.5264	36.2801	32.7726
0	37.1269	38.959	35.2949	34.2252	35.9686	32.4818
1	36.9259	38.7346	35.1172	33.9259	35.6603	32.1916
2	36.7689	38.5535	34.9843	33.6547	35.3835	31.926
3	36.627	38.3862	34.8677	33.4139	35.1408	31.687
4	36.5117	38.2458	34.7777	33.2403	34.9667	31.5139
5	36.4293	38.1374	34.7211	33.0862	34.814	31.3583
6	36.3697	38.0535	34.6859	32.9726	34.7035	31.2418
7	36.3205	37.9814	34.6597	32.9274	34.6643	31.1905
8	36.2859	37.926	34.6459	32.9381	34.6808	31.1953
9	36.3093	37.9303	34.6884	32.9917	34.742	31.2415
10	36.3529	37.9569	34.7489	33.1047	34.8624	31.3471
11	36.4018	37.9927	34.8109	33.2504	35.0152	31.4855
12	36.486	38.0679	34.904	33.4203	35.1918	31.6488
13	36.5944	38.1726	35.0163	33.6277	35.4067	31.8486
14	36.7204	38.2993	35.1414	33.8414	35.6275	32.0553
15	36.8565	38.441	35.272	34.0668	35.8603	32.2734
16	36.9833	38.5766	35.3899	34.2941	36.093	32.4951
17	37.1272	38.7338	35.5207	34.5152	36.32	32.7105
18	37.2512	38.8749	35.6276	34.7334	36.5434	32.9234
19	37.3661	39.0066	35.7256	34.9345	36.7502	33.1189
20	37.4719	39.1329	35.8108	35.1175	36.9378	33.2971
21	37.5384	39.2181	35.8587	35.2464	37.0718	33.4209
22	37.5605	39.2576	35.8633	35.3569	37.1886	33.5251
23	37.5372	39.2519	35.8225	35.4351	37.2733	33.597
24	37.493	39.2211	35.7649	35.479	37.3234	33.6347
25	37.4011	39.1385	35.6636	35.4755	37.3315	33.6196
26	37.2534	38.9962	35.5105	35.4383	37.3054	33.5712
27	37.0395	38.7839	35.295	35.3712	37.2516	33.4909
28	36.7505	38.4915	35.0095	35.2666	37.1613	33.372
29	36.3979	38.132	34.6638	35.1085	37.019	33.198
30	35.9895	37.7128	34.2662	34.9148	36.8421	32.9874
31	35.5098	37.2188	33.8008	34.6894	36.6334	32.7453
32	34.9792	36.6697	33.2887	34.4178	36.3769	32.4587
33	34.3892	36.0597	32.7186	34.1125	36.0846	32.1405
34	33.7486	35.3978	32.0993	33.7605	35.7433	31.7777
35	33.0442	34.6719	31.4165	33.3678	35.3584	31.3773
36	32.2941	33.8994	30.6888	32.9402	34.9349	30.9455
37	31.5057	33.0889	29.9225	32.4732	34.4674	30.479
38	30.6981	32.2606	29.1356	31.9859	33.9764	29.9954
39	29.8669	31.4104	28.3235	31.4709	33.455	29.4869
40	29.0057	30.5321	27.4794	30.9188	32.892	28.9456
41	28.1433	29.6538	26.6328	30.3604	32.3201	28.4007
42	27.282	28.7799	25.7841	29.7929	31.7367	27.8491
43	26.4242	27.9122	24.9361	29.2247	31.1526	27.2969
44	25.5738	27.0539	24.0936	28.6583	30.5701	26.7466
45	24.73	26.2048	23.2552	28.1017	29.9993	26.2042
46	23.8976	25.3661	22.4291	27.5552	29.4409	25.6696
47	23.0878	24.5501	21.6254	27.0435	28.9185	25.1685
48	22.2966	23.7549	20.8383	26.5663	28.4299	24.7026
49	21.5507	23.0036	20.0977	26.1214	27.9777	24.2652
50	20.819	22.2639	19.3742	25.7274	27.5758	23.879
51	20.1339	21.5697	18.6981	25.3868	27.2297	23.5438
52	19.4864	20.9103	18.0624	25.0714	26.9101	23.2328
53	18.8777	20.2884	17.467	24.8181	26.6523	22.984
54	18.2975	19.6929	16.902	24.6345	26.4634	22.8056
55	17.7846	19.1652	16.4041	24.4917	26.314	22.6693
56	17.3218	18.6858	15.9578	24.41	26.2261	22.594
57	16.9028	18.252	15.5536	24.3644	26.1735	22.5553
58	16.5633	17.897	15.2295	24.3769	26.1786	22.5752
59	16.2772	17.5972	14.9572	24.4322	26.2264	22.6379
60	16.0493	17.3619	14.7368	24.5402	26.3263	22.754
61	15.8918	17.2001	14.5834	24.7019	26.4798	22.9239
62	15.8273	17.1384	14.5163	24.8936	26.6669	23.1204
63	15.8148	17.1336	14.496	25.094	26.8627	23.3252
64	15.887	17.22	14.5541	25.3443	27.1111	23.5775
65	16.0245	17.3781	14.6709	25.6362	27.4026	23.8697
66	16.2365	17.6131	14.8599	25.9432	27.7128	24.1737
67	16.509	17.9113	15.1067	26.2685	28.042	24.4951
68	16.836	18.2663	15.4057	26.6064	28.3852	24.8276
69	17.2312	18.6898	15.7726	26.9441	28.7301	25.1582
70	17.7022	19.1892	16.2151	27.2964	29.0912	25.5015
71	18.2271	19.7407	16.7135	27.6838	29.4879	25.8796
72	18.7863	20.3242	17.2484	28.0665	29.8797	26.2534
73	19.4213	20.9797	17.8629	28.4817	30.3052	26.6581
74	20.1036	21.6807	18.5265	28.9007	30.7341	27.0672
75	20.8269	22.4191	19.2347	29.3203	31.1645	27.4761
76	21.5749	23.179	19.9707	29.7652	31.6192	27.9112
77	22.3633	23.9761	20.7506	30.213	32.0764	28.3496
78	23.1791	24.7983	21.5599	30.6607	32.5342	28.7872
79	24.0315	25.6541	22.4088	31.1121	32.9958	29.2285
80	24.9007	26.5241	23.2774	31.5884	33.4806	29.6963
81	25.8116	27.4368	24.1864	32.0737	33.9751	30.1723
82	26.7325	28.3565	25.1086	32.5624	34.4712	30.6536
83	27.6362	29.2589	26.0135	33.052	34.9678	31.1362
84	28.5743	30.1934	26.9552	33.5725	35.4967	31.6482
85	29.5088	31.1259	27.8917	34.1063	36.0397	32.1729
86	30.4463	32.0598	28.8327	34.657	36.5999	32.714
87	31.3736	32.9847	29.7625	35.214	37.165	33.2631
88	32.2725	33.8813	30.6637	35.7845	37.7426	33.8264
89	33.1579	34.766	31.5497	36.3838	38.3507	34.417
90	34.0187	35.6259	32.4116	36.9626	38.9359	34.9894
91	34.836	36.4416	33.2304	37.555	39.5366	35.5734
92	35.6185	37.2241	34.0128	38.1355	40.1235	36.1476
93	36.3545	37.9613	34.7478	38.7256	40.7169	36.7343
94	37.0454	38.6538	35.437	39.3028	41.2972	37.3083
95	37.6996	39.3097	36.0895	39.8615	41.8585	37.8645
96	38.2897	39.9001	36.6793	40.4286	42.4261	38.4311
97	38.8399	40.4498	37.23	40.9581	42.9561	38.9602
98	39.3201	40.9285	37.7116	41.4484	43.4437	39.453
99	39.7609	41.3675	38.1544	41.929	43.9237	39.9342
100	40.1289	41.7313	38.5264	42.3686	44.3602	40.3769
101	40.4431	42.0398	38.8463	42.7792	44.7665	40.7919
102	40.6959	42.2862	39.1055	43.1402	45.1245	41.1559
103	40.9192	42.5024	39.3361	43.4484	45.4301	41.4667
104	41.0727	42.6491	39.4964	43.7306	45.7074	41.7539
105	41.1947	42.7647	39.6247	43.9607	45.9331	41.9884
106	41.2545	42.8191	39.6899	44.1419	46.1094	42.1745
107	41.2913	42.8521	39.7304	44.2895	46.2542	42.3248
108	41.2696	42.8289	39.7103	44.4297	46.3919	42.4675
109	41.2264	42.786	39.6668	44.5116	46.4735	42.5497
110	41.169	42.7316	39.6065	44.5498	46.5105	42.5892
111	41.0883	42.6553	39.5214	44.5729	46.5317	42.6141
112	40.9803	42.5555	39.4051	44.5747	46.5327	42.6167
113	40.8907	42.4745	39.3068	44.5509	46.5091	42.5926
114	40.7674	42.3616	39.1731	44.5222	46.4798	42.5647
115	40.6605	42.2663	39.0546	44.4673	46.4262	42.5084
116	40.5842	42.2016	38.9668	44.425	46.3823	42.4677
117	40.5106	42.1398	38.8814	44.3984	46.3536	42.4432
118	40.4752	42.1153	38.8352	44.3457	46.2994	42.3921
119	40.4447	42.0951	38.7943	44.3099	46.2607	42.359
120	40.4451	42.107	38.7831	44.2583	46.2074	42.3092
121	40.459	42.1294	38.7887	44.2366	46.1836	42.2897
122	40.5288	42.2087	38.8488	44.2242	46.1691	42.2794
123	40.6357	42.3256	38.9457	44.2195	46.1611	42.2778
124	40.7936	42.491	39.0961	44.2066	46.1485	42.2647
125	40.9777	42.6821	39.2734	44.2292	46.1707	42.2878
126	41.1961	42.9056	39.4866	44.2433	46.1877	42.2989
127	41.4323	43.145	39.7197	44.2824	46.2305	42.3344
128	41.6893	43.4033	39.9753	44.3216	46.2754	42.3678
129	41.9855	43.7003	40.2707	44.3613	46.3226	42.4
130	42.2975	44.0124	40.5827	44.3854	46.3578	42.413
131	42.6273	44.3422	40.9125	44.4503	46.4369	42.4637
132	42.9487	44.663	41.2343	44.475	46.4767	42.4732
133	43.2779	44.9885	41.5674	44.5032	46.5215	42.485
134	43.6024	45.3121	41.8927	44.5245	46.5623	42.4867
135	43.9122	45.6211	42.2034	44.5418	46.5994	42.4842
136	44.2239	45.9328	42.515	44.5546	46.6321	42.4772
137	44.504	46.2129	42.795	44.5544	46.6533	42.4555
138	44.7456	46.4573	43.0339	44.5595	46.676	42.4431
139	44.9561	46.6707	43.2414	44.5611	46.6982	42.424
140	45.1373	46.8549	43.4198	44.5467	46.6984	42.3951
141	45.2751	46.9976	43.5527	44.5513	46.7185	42.3841
142	45.3996	47.1266	43.6725	44.539	46.7189	42.3591
143	45.4665	47.1964	43.7366	44.5325	46.7189	42.346
144	45.4903	47.2221	43.7585	44.5308	46.7189	42.3427
145	45.4889	47.2207	43.7571	44.5344	46.7217	42.347
146	45.4657	47.1965	43.7348	44.5454	46.7257	42.3651
147	45.4303	47.1615	43.6992	44.5641	46.7312	42.397
148	45.359	47.0876	43.6304	44.5922	46.7404	42.4441
149	45.2537	46.9808	43.5266	44.6631	46.7884	42.5379
150	45.1501	46.8775	43.4227	44.7351	46.8308	42.6395
151	45.0296	46.7556	43.3036	44.8404	46.9034	42.7774
152	44.8907	46.6142	43.1671	44.9486	46.9787	42.9185
153	44.7441	46.4653	43.023	45.0816	47.0754	43.0878
154	44.5795	46.2997	42.8594	45.2571	47.2163	43.2979
155	44.4396	46.1585	42.7206	45.4538	47.3809	43.5267
156	44.278	45.9952	42.5608	45.6871	47.586	43.7881
157	44.1119	45.8299	42.3939	45.9576	47.8371	44.0781
158	43.9298	45.6484	42.2113	46.2316	48.097	44.3662
159	43.76	45.4781	42.0418	46.5309	48.3905	44.6713
160	43.5899	45.3072	41.8725	46.8622	48.7268	44.9976
161	43.4219	45.1374	41.7064	47.2042	49.0785	45.3299
162	43.2399	44.952	41.5278	47.5778	49.4724	45.6831
163	43.0546	44.7622	41.3471	47.9583	49.8784	46.0382
164	42.8662	44.5698	41.1627	48.3357	50.2881	46.3834
165	42.6994	44.3973	41.0015	48.6986	50.6891	46.7082
166	42.517	44.208	40.8259	49.0839	51.1173	47.0504
167	42.365	44.0504	40.6797	49.4381	51.5141	47.3622
168	42.2237	43.9026	40.5449	49.7723	51.8925	47.652
169	42.0858	43.7618	40.4097	50.1106	52.2744	47.9467
170	41.9735	43.6459	40.3011	50.4236	52.6304	48.2168
171	41.8979	43.5655	40.2303	50.6964	52.9441	48.4486
172	41.8061	43.4735	40.1387	50.919	53.2037	48.6342
173	41.7763	43.4444	40.1082	51.1278	53.4459	48.8096
174	41.7666	43.4376	40.0956	51.3045	53.6507	48.9583
175	41.7643	43.4377	40.091	51.4084	53.7775	49.0392
176	41.7892	43.4671	40.1113	51.4922	53.8794	49.1051
177	41.8125	43.4952	40.1297	51.5395	53.9411	49.1379
178	41.8946	43.5847	40.2045	51.5392	53.9512	49.1272
179	41.9831	43.6796	40.2867	51.5221	53.9376	49.1066
180	42.0884	43.791	40.3859	51.4848	53.9024	49.0672
181	42.1968	43.9044	40.4893	51.4311	53.8474	49.0147
182	42.32	44.0316	40.6084	51.3811	53.797	48.9653
183	42.4407	44.1571	40.7243	51.2953	53.7104	48.8803
184	42.5797	44.3006	40.8588	51.1765	53.5927	48.7603
185	42.724	44.451	40.9969	51.0902	53.5102	48.6702
186	42.8801	44.615	41.1452	51.0147	53.4394	48.5901
187	43.0406	44.7851	41.2962	50.9275	53.3621	48.493
188	43.1623	44.9164	41.4082	50.8621	53.312	48.4122
189	43.2987	45.064	41.5335	50.8106	53.2789	48.3423
190	43.4291	45.2056	41.6526	50.7504	53.2418	48.2591
191	43.5524	45.3408	41.7639	50.7232	53.2387	48.2078
192	43.679	45.4837	41.8743	50.7229	53.2696	48.1761
193	43.8088	45.6301	41.9876	50.732	53.3108	48.1532
194	43.9323	45.7708	42.0938	50.7575	53.3712	48.1439
195	44.0332	45.887	42.1794	50.808	53.4615	48.1544
196	44.133	46.0012	42.2647	50.8843	53.5781	48.1904
197	44.2186	46.0985	42.3386	50.9481	53.6825	48.2137
198	44.3046	46.1958	42.4134	51.0239	53.8024	48.2453
199	44.3611	46.2572	42.465	51.1266	53.95	48.3032
200	44.394	46.2935	42.4945	51.2218	54.0886	48.3549

## Sheet: H
Time (ms)	Mean value (blue)	Upper s.e.m. value (blue)	Lower s.e.m. (blue)	Mean value (light blue)	Upper s.e.m. value (light blue)	Lower s.e.m. (light blue)
-50	85.0173	89.4166	80.618	76.5022	79.985	73.0194
-49	84.3917	88.7281	80.0553	76.4912	79.9809	73.0015
-48	83.7554	88.0307	79.48	76.4871	79.9834	72.9909
-47	83.1497	87.3651	78.9343	76.4705	79.9754	72.9656
-46	82.5813	86.7396	78.423	76.4471	79.9629	72.9313
-45	82.0318	86.1354	77.9283	76.4557	79.9841	72.9273
-44	81.4985	85.549	77.448	76.4786	80.0198	72.9375
-43	81.0203	85.0189	77.0217	76.5031	80.0546	72.9516
-42	80.5785	84.5277	76.6293	76.5221	80.0851	72.9591
-41	80.1754	84.0757	76.2752	76.5614	80.1343	72.9886
-40	79.8266	83.6803	75.9728	76.621	80.2032	73.0388
-39	79.5222	83.3279	75.7164	76.685	80.2751	73.095
-38	79.2843	83.0427	75.5258	76.7589	80.3552	73.1626
-37	79.0611	82.7706	75.3516	76.8334	80.4328	73.234
-36	78.8992	82.5581	75.2403	76.9077	80.5084	73.307
-35	78.7722	82.3798	75.1646	76.9684	80.5673	73.3695
-34	78.702	82.2547	75.1493	77.0249	80.6205	73.4294
-33	78.634	82.1288	75.1392	77.0313	80.6189	73.4436
-32	78.5829	82.0165	75.1493	77.0339	80.612	73.4557
-31	78.562	81.9318	75.1923	76.9853	80.5502	73.4204
-30	78.5371	81.8394	75.2348	76.9391	80.4915	73.3868
-29	78.5277	81.7592	75.2962	76.8427	80.3803	73.3051
-28	78.5408	81.7	75.3816	76.7408	80.2606	73.221
-27	78.5305	81.6171	75.4438	76.5854	80.0885	73.0823
-26	78.5189	81.5294	75.5084	76.4029	79.8866	72.9193
-25	78.4626	81.4011	75.524	76.152	79.6142	72.6899
-24	78.392	81.2601	75.5239	75.8921	79.3351	72.4491
-23	78.2853	81.0869	75.4838	75.6163	79.0375	72.195
-22	78.1407	80.8782	75.4031	75.3276	78.7275	71.9277
-21	77.9862	80.6648	75.3076	75.0617	78.4393	71.6842
-20	77.8171	80.4443	75.1899	74.7333	78.0858	71.3808
-19	77.6429	80.223	75.0628	74.4367	77.7658	71.1076
-18	77.4138	79.9521	74.8754	74.1358	77.4389	70.8327
-17	77.1945	79.6992	74.6897	73.8591	77.1367	70.5815
-16	76.9481	79.424	74.4722	73.5905	76.8434	70.3376
-15	76.7135	79.1638	74.2632	73.3189	76.5437	70.0942
-14	76.4526	78.882	74.0233	73.0779	76.2753	69.8805
-13	76.198	78.6094	73.7866	72.8533	76.0256	69.6811
-12	75.9476	78.3433	73.5518	72.6525	75.7982	69.5067
-11	75.6746	78.0559	73.2932	72.4596	75.5818	69.3375
-10	75.395	77.7617	73.0284	72.2942	75.3922	69.1963
-9	75.1113	77.4649	72.7578	72.1279	75.2046	69.0512
-8	74.8329	77.1749	72.4909	71.9578	75.0136	68.9019
-7	74.5735	76.9039	72.2432	71.8238	74.8595	68.7882
-6	74.313	76.6315	71.9944	71.7062	74.7231	68.6893
-5	74.0448	76.3545	71.7351	71.5955	74.5923	68.5986
-4	73.762	76.0645	71.4595	71.5108	74.4873	68.5343
-3	73.524	75.8193	71.2287	71.44	74.3966	68.4835
-2	73.2586	75.5493	70.968	71.3709	74.3066	68.4352
-1	73.0233	75.3134	70.7332	71.3169	74.2293	68.4044
0	72.7884	75.0801	70.4968	71.2615	74.1483	68.3748
1	72.5535	74.8479	70.2591	71.2492	74.1094	68.3891
2	72.3327	74.6347	70.0307	71.246	74.077	68.4149
3	72.1288	74.4376	69.82	71.2207	74.023	68.4183
4	71.9297	74.2479	69.6114	71.2345	74.0043	68.4647
5	71.7468	74.0759	69.4177	71.2571	73.9964	68.5178
6	71.598	73.9372	69.2588	71.2755	73.9841	68.5669
7	71.4684	73.8202	69.1166	71.3056	73.9853	68.626
8	71.3599	73.7246	68.9952	71.3276	73.9772	68.678
9	71.2827	73.6595	68.9058	71.3477	73.9722	68.7232
10	71.2292	73.6204	68.8379	71.3842	73.9823	68.7861
11	71.2235	73.627	68.8199	71.412	73.9886	68.8355
12	71.2447	73.6601	68.8294	71.4388	73.9966	68.881
13	71.2884	73.7146	68.8622	71.4632	74.0051	68.9212
14	71.3562	73.7933	68.9191	71.4716	73.9995	68.9437
15	71.4554	73.9042	69.0065	71.4898	74.0075	68.9721
16	71.5901	74.0516	69.1287	71.4929	74.0024	68.9833
17	71.7449	74.217	69.2729	71.484	73.9935	68.9746
18	71.9258	74.4094	69.4422	71.4512	73.9618	68.9407
19	72.12	74.6154	69.6247	71.4159	73.9311	68.9008
20	72.2952	74.8008	69.7896	71.3623	73.8843	68.8403
21	72.4856	74.9987	69.9726	71.2924	73.824	68.7609
22	72.6899	75.2118	70.168	71.236	73.7794	68.6925
23	72.8444	75.3742	70.3146	71.1465	73.7015	68.5915
24	72.9951	75.5337	70.4565	71.0399	73.6071	68.4727
25	73.1094	75.6567	70.5621	70.9216	73.5022	68.3409
26	73.2115	75.7669	70.6561	70.7904	73.3819	68.199
27	73.2552	75.8181	70.6922	70.6229	73.2253	68.0204
28	73.227	75.7974	70.6567	70.4422	73.0543	67.83
29	73.1552	75.7328	70.5776	70.2217	72.8401	67.6034
30	72.9797	75.5615	70.3979	69.9776	72.6018	67.3534
31	72.749	75.336	70.1621	69.6973	72.3242	67.0705
32	72.4454	75.0355	69.8554	69.4077	72.0365	66.7789
33	72.0453	74.6375	69.453	69.0908	71.7189	66.4627
34	71.5843	74.1756	68.9931	68.7887	71.4158	66.1616
35	71.0261	73.6126	68.4397	68.4517	71.0742	65.8292
36	70.3867	72.9658	67.8076	68.1084	70.723	65.4939
37	69.6671	72.2375	67.0968	67.757	70.3633	65.1508
38	68.8884	71.4471	66.3297	67.3982	69.9947	64.8016
39	68.0455	70.5902	65.5008	67.1054	69.6892	64.5217
40	67.1282	69.6562	64.6002	66.8019	69.3703	64.2335
41	66.2106	68.7227	63.6985	66.5297	69.0818	63.9775
42	65.2383	67.7316	62.745	66.2576	68.793	63.7223
43	64.27	66.7446	61.7954	66.0187	68.5369	63.5004
44	63.2813	65.7385	60.8241	65.8157	68.317	63.3144
45	62.3075	64.7477	59.8673	65.6405	68.1246	63.1565
46	61.3463	63.7695	58.9231	65.5167	67.9871	63.0463
47	60.4169	62.8256	58.0082	65.3823	67.8415	62.9231
48	59.5577	61.953	57.1624	65.2988	67.7499	62.8478
49	58.7653	61.1509	56.3796	65.214	67.6612	62.7667
50	58.033	60.4123	55.6537	65.1689	67.6155	62.7222
51	57.3785	59.7536	55.0034	65.1455	67.5934	62.6975
52	56.8103	59.1839	54.4368	65.1156	67.5676	62.6636
53	56.3513	58.7273	53.9753	65.1065	67.5633	62.6498
54	55.9967	58.374	53.6194	65.0958	67.5583	62.6333
55	55.7537	58.136	53.3714	65.0927	67.5621	62.6232
56	55.6068	57.9936	53.2201	65.097	67.5708	62.6232
57	55.5853	57.9777	53.1928	65.1269	67.6025	62.6513
58	55.6448	58.0451	53.2446	65.1462	67.6217	62.6708
59	55.8308	58.2398	53.4219	65.2024	67.6767	62.728
60	56.1097	58.5254	53.6941	65.2579	67.7298	62.7861
61	56.5072	58.9284	54.0861	65.3512	67.8187	62.8838
62	56.9865	59.416	54.5571	65.4883	67.9485	63.0281
63	57.5862	60.0238	55.1486	65.6553	68.1073	63.2032
64	58.2571	60.7026	55.8115	65.8438	68.2891	63.3985
65	59.0429	61.4965	56.5893	66.092	68.5315	63.6525
66	59.8845	62.3444	57.4247	66.3749	68.8085	63.9413
67	60.852	63.319	58.385	66.7624	69.1943	64.3304
68	61.8807	64.3559	59.4056	67.1502	69.5806	64.7198
69	62.9833	65.4657	60.5009	67.6036	70.034	65.1732
70	64.1552	66.6451	61.6652	68.0876	70.5183	65.6569
71	65.4196	67.9179	62.9212	68.63	71.0629	66.197
72	66.7133	69.2179	64.2087	69.2267	71.6607	66.7926
73	68.0997	70.6131	65.5862	69.8532	72.2904	67.4161
74	69.5276	72.05	67.0052	70.4932	72.9306	68.0559
75	70.9846	73.516	68.4531	71.1945	73.6338	68.7551
76	72.4788	75.0224	69.9352	71.9159	74.3573	69.4744
77	74.0127	76.5692	71.4562	72.6345	75.0759	70.1931
78	75.5456	78.118	72.9732	73.3518	75.7941	70.9095
79	77.0838	79.6748	74.4928	74.0863	76.5305	71.6421
80	78.5789	81.1921	75.9657	74.8139	77.2626	72.3653
81	80.0539	82.6923	77.4155	75.5069	77.9611	73.0528
82	81.5101	84.177	78.8431	76.1948	78.6565	73.7331
83	82.8743	85.5721	80.1766	76.8549	79.3267	74.3831
84	84.1638	86.893	81.4345	77.4628	79.9479	74.9776
85	85.3756	88.1369	82.6144	78.0528	80.5566	75.5489
86	86.5018	89.2976	83.706	78.6116	81.1353	76.0879
87	87.5099	90.3385	84.6812	79.0926	81.6398	76.5454
88	88.4077	91.2684	85.5471	79.5311	82.1023	76.9599
89	89.2213	92.1113	86.3312	79.9349	82.5317	77.3381
90	89.869	92.784	86.954	80.2695	82.8911	77.6479
91	90.3813	93.3153	87.4473	80.544	83.1878	77.9001
92	90.7729	93.7225	87.8234	80.7727	83.4369	78.1086
93	91.0448	94.0023	88.0873	80.942	83.6234	78.2606
94	91.1889	94.1498	88.2281	81.0552	83.7489	78.3616
95	91.2081	94.1664	88.2497	81.1238	83.8246	78.4229
96	91.132	94.0802	88.1837	81.125	83.8296	78.4204
97	90.921	93.8544	87.9876	81.0766	83.7796	78.3736
98	90.6049	93.5181	87.6917	80.964	83.6629	78.2651
99	90.2174	93.1061	87.3287	80.838	83.5289	78.1472
100	89.7725	92.6339	86.9111	80.6577	83.3404	77.9749
101	89.239	92.0693	86.4088	80.4582	83.1317	77.7848
102	88.6616	91.4582	85.8651	80.2032	82.8691	77.5372
103	88.0528	90.8139	85.2917	79.9246	82.585	77.2643
104	87.4125	90.1392	84.6857	79.5961	82.2545	76.9376
105	86.7627	89.4562	84.0693	79.2391	81.898	76.5802
106	86.1224	88.7825	83.4624	78.8787	81.5433	76.2141
107	85.4873	88.1191	82.8554	78.4841	81.1549	75.8132
108	84.8693	87.4746	82.2639	78.0636	80.7433	75.3839
109	84.298	86.881	81.7151	77.6172	80.3069	74.9274
110	83.7555	86.3206	81.1905	77.1553	79.8578	74.4528
111	83.2981	85.8501	80.746	76.6797	79.3941	73.9652
112	82.8558	85.3985	80.3131	76.1795	78.9026	73.4564
113	82.4712	85.0078	79.9345	75.6733	78.4039	72.9426
114	82.1309	84.664	79.5979	75.1511	77.8865	72.4158
115	81.8164	84.3479	79.285	74.606	77.3431	71.8688
116	81.573	84.1036	79.0424	74.005	76.7419	71.2682
117	81.3587	83.8901	78.8273	73.4074	76.1394	70.6753
118	81.1693	83.7005	78.6381	72.7819	75.5049	70.059
119	81.0049	83.5357	78.474	72.1422	74.8542	69.4302
120	80.8304	83.3588	78.302	71.4528	74.1522	68.7535
121	80.6914	83.2174	78.1654	70.7553	73.4403	68.0704
122	80.5247	83.0468	78.0027	70.0534	72.7242	67.3827
123	80.3616	82.8785	77.8447	69.3602	72.0155	66.7049
124	80.1333	82.646	77.6206	68.6539	71.293	66.0148
125	79.917	82.4246	77.4093	67.9544	70.5772	65.3316
126	79.642	82.141	77.1431	67.2278	69.8364	64.6191
127	79.3722	81.8642	76.8801	66.558	69.1511	63.965
128	79.0746	81.5585	76.5907	65.8676	68.4466	63.2887
129	78.7251	81.2005	76.2497	65.2388	67.8044	62.6733
130	78.3632	80.8312	75.8952	64.6287	67.179	62.0784
131	77.9975	80.4574	75.5377	64.043	66.579	61.507
132	77.5853	80.0359	75.1348	63.5127	66.0335	60.9919
133	77.2079	79.6499	74.766	63.027	65.5334	60.5206
134	76.8181	79.2537	74.3826	62.5794	65.0695	60.0894
135	76.4301	78.8582	74.002	62.1951	64.6693	59.7208
136	76.0375	78.4599	73.6151	61.8748	64.3326	59.417
137	75.6806	78.0983	73.2629	61.6091	64.0504	59.1678
138	75.3569	77.7713	72.9425	61.3781	63.8012	58.9549
139	75.0518	77.4638	72.6399	61.2005	63.6064	58.7946
140	74.7657	77.1748	72.3566	61.0881	63.4797	58.6966
141	74.4811	76.888	72.0743	61.0403	63.416	58.6645
142	74.2442	76.6524	71.8361	61.0288	63.3889	58.6687
143	74.024	76.4339	71.6141	61.0459	63.3952	58.6967
144	73.8181	76.2322	71.404	61.1143	63.4559	58.7727
145	73.6357	76.0529	71.2185	61.1864	63.5235	58.8493
146	73.4772	75.8997	71.0547	61.2897	63.6257	58.9536
147	73.3126	75.7429	70.8822	61.4024	63.7435	59.0614
148	73.142	75.5824	70.7016	61.4769	63.8265	59.1272
149	72.9923	75.4457	70.5389	61.5685	63.9325	59.2045
150	72.8672	75.3335	70.4009	61.6438	64.0265	59.2612
151	72.7207	75.2017	70.2397	61.6844	64.0879	59.281
152	72.5698	75.0683	70.0713	61.6927	64.1191	59.2663
153	72.406	74.9215	69.8905	61.6788	64.1298	59.2277
154	72.2231	74.7574	69.6889	61.6437	64.1191	59.1682
155	71.9979	74.5507	69.4451	61.5506	64.0512	59.0501
156	71.7943	74.3672	69.2214	61.4216	63.945	58.8982
157	71.5515	74.1429	68.96	61.2816	63.8243	58.739
158	71.275	73.8844	68.6656	61.093	63.6554	58.5307
159	70.9647	73.5899	68.3395	60.8615	63.439	58.2841
160	70.6717	73.3109	68.0325	60.6175	63.209	58.0259
161	70.3524	73.0052	67.6996	60.3778	62.9819	57.7737
162	69.9981	72.6618	67.3344	60.136	62.7482	57.5238
163	69.6254	72.2978	66.953	59.8725	62.4919	57.2532
164	69.2606	71.9379	66.5833	59.6267	62.2533	57.0001
165	68.8797	71.5612	66.1983	59.3874	62.0193	56.7555
166	68.4997	71.1839	65.8154	59.1662	61.8035	56.529
167	68.1336	70.8203	65.4469	58.9783	61.6204	56.3362
168	67.7746	70.4613	65.0879	58.7904	61.4368	56.1439
169	67.4167	70.1021	64.7314	58.6305	61.2778	55.9832
170	67.0725	69.7575	64.3875	58.5009	61.1485	55.8534
171	66.7801	69.4641	64.0961	58.4087	61.0568	55.7606
172	66.5148	69.1998	63.8297	58.3255	60.9714	55.6796
173	66.3098	68.9957	63.6238	58.2691	60.913	55.6251
174	66.1292	68.8186	63.4399	58.2367	60.8777	55.5957
175	65.9877	68.6796	63.2958	58.2695	60.906	55.6331
176	65.8942	68.5917	63.1966	58.2801	60.9099	55.6503
177	65.8697	68.574	63.1654	58.3257	60.952	55.6994
178	65.8721	68.5861	63.1581	58.3733	60.9918	55.7547
179	65.936	68.6597	63.2122	58.4334	61.0443	55.8224
180	66.0417	68.7774	63.3061	58.4884	61.0925	55.8844
181	66.1908	68.9414	63.4402	58.5349	61.1349	55.935
182	66.3915	69.1557	63.6272	58.5854	61.1785	55.9923
183	66.6342	69.4134	63.855	58.6292	61.2189	56.0395
184	66.9018	69.6979	64.1056	58.6643	61.2473	56.0812
185	67.2087	70.024	64.3934	58.699	61.2783	56.1197
186	67.5215	70.3556	64.6873	58.725	61.3011	56.1489
187	67.863	70.7181	65.0079	58.7555	61.3268	56.1842
188	68.2373	71.1171	65.3575	58.7557	61.3216	56.1897
189	68.6022	71.5092	65.6953	58.7751	61.3384	56.2118
190	68.9745	71.9109	66.038	58.7957	61.3553	56.2361
191	69.357	72.3263	66.3877	58.8143	61.3712	56.2575
192	69.7103	72.7161	66.7044	58.8631	61.416	56.3103
193	70.0703	73.1171	67.0236	58.9003	61.4508	56.3498
194	70.4177	73.5088	67.3266	58.9571	61.5055	56.4088
195	70.7669	73.9076	67.6262	59.0467	61.5938	56.4995
196	71.1189	74.3138	67.924	59.1404	61.6896	56.5912
197	71.4334	74.6874	68.1794	59.2444	61.7955	56.6932
198	71.7576	75.0749	68.4402	59.3605	61.9157	56.8054
199	72.0559	75.4414	68.6705	59.4984	62.0575	56.9392
200	72.3622	75.8183	68.9062	59.6501	62.2147	57.0856

## Sheet: D
Time (ms)	Mean value (spikes/s)	Upper s.e.m. value (spikes/s)	Lower s.e.m. (spikes/s)
-50	42.1495	55.1547	29.1443
-49	42.1914	55.0115	29.3714
-48	42.1475	54.7801	29.5149
-47	42.0303	54.4645	29.5961
-46	41.9532	54.2387	29.6678
-45	41.8864	54.0391	29.7338
-44	41.8445	53.8713	29.8177
-43	41.886	53.8199	29.952
-42	41.9832	53.7999	30.1664
-41	42.151	53.8718	30.4303
-40	42.4024	54.0326	30.7722
-39	42.6877	54.2082	31.1672
-38	42.9214	54.2975	31.5453
-37	43.4032	54.6877	32.1186
-36	44.0704	55.3328	32.8081
-35	44.8361	56.0956	33.5765
-34	45.5803	56.8555	34.305
-33	46.4402	57.808	35.0723
-32	47.3622	58.8659	35.8585
-31	48.5147	60.2823	36.7471
-30	49.5293	61.5862	37.4724
-29	50.483	62.8817	38.0843
-28	51.6251	64.4645	38.7857
-27	52.8628	66.2071	39.5185
-26	54.036	67.9253	40.1468
-25	55.2319	69.6628	40.8009
-24	56.4662	71.5198	41.4125
-23	57.8464	73.6091	42.0837
-22	59.1633	75.6157	42.7109
-21	60.5125	77.6739	43.351
-20	61.9596	79.8717	44.0474
-19	63.44	82.0894	44.7907
-18	65.0625	84.4698	45.6552
-17	66.7749	87.0231	46.5268
-16	68.5231	89.5617	47.4844
-15	70.2896	92.1021	48.477
-14	72.2271	94.8501	49.6041
-13	74.1648	97.5673	50.7624
-12	76.146	100.351	51.9409
-11	78.1496	103.094	53.2051
-10	80.136	105.785	54.4867
-9	82.2102	108.583	55.8376
-8	84.1422	111.144	57.14
-7	85.9744	113.556	58.3931
-6	87.6749	115.78	59.5699
-5	89.2714	117.879	60.6634
-4	90.7084	119.749	61.6673
-3	92.0231	121.409	62.6374
-2	92.9794	122.641	63.3173
-1	93.8099	123.738	63.8821
0	94.3451	124.46	64.2307
1	94.7144	124.959	64.4695
2	94.8204	125.168	64.4726
3	94.8205	125.268	64.3725
4	94.5902	125.046	64.1343
5	94.0806	124.518	63.6435
6	93.5218	123.924	63.1192
7	92.8144	123.057	62.5715
8	92.0357	122.169	61.9028
9	91.1462	121.151	61.1411
10	90.2956	120.111	60.4804
11	89.4579	119.081	59.8347
12	88.7082	118.126	59.2906
13	88.0327	117.198	58.8675
14	87.4724	116.378	58.5667
15	87.0485	115.665	58.4318
16	86.7173	115.049	58.3858
17	86.4851	114.503	58.4669
18	86.392	114.071	58.7133
19	86.4871	113.809	59.1657
20	86.6984	113.639	59.7582
21	87.0517	113.58	60.5235
22	87.4833	113.565	61.4018
23	87.8213	113.395	62.2473
24	88.1917	113.226	63.1577
25	88.6451	113.138	64.1525
26	89.1065	113.02	65.1926
27	89.4621	112.779	66.1448
28	89.5971	112.271	66.9235
29	89.835	111.904	67.7659
30	89.8668	111.292	68.4412
31	89.6813	110.447	68.9151
32	89.2979	109.422	69.1737
33	88.8561	108.35	69.3622
34	88.1819	107.044	69.3199
35	87.339	105.598	69.08
36	86.4101	104.032	68.7883
37	85.4111	102.523	68.2994
38	84.2906	100.933	67.6486
39	83.0889	99.2895	66.8884
40	81.7441	97.5323	65.9559
41	80.3657	95.8056	64.9257
42	78.9155	94.01	63.821
43	77.618	92.4295	62.8064
44	76.2774	90.8479	61.7069
45	74.9145	89.2601	60.5689
46	73.6468	87.7946	59.499
47	72.385	86.3188	58.4512
48	71.2398	84.9951	57.4845
49	70.2185	83.7866	56.6504
50	69.0918	82.4205	55.763

## Sheet: I
Time (ms)	Mean value (spikes/s)	Upper s.e.m. value (spikes/s)	Lower s.e.m. (spikes/s)
-50	112.555	118.937	106.173
-49	111.911	118.2	105.621
-48	111.248	117.439	105.057
-47	110.572	116.665	104.48
-46	109.973	115.957	103.99
-45	109.438	115.321	103.554
-44	108.918	114.703	103.133
-43	108.485	114.169	102.8
-42	108.101	113.694	102.508
-41	107.939	113.478	102.4
-40	107.81	113.299	102.32
-39	107.772	113.235	102.309
-38	107.948	113.393	102.503
-37	108.249	113.712	102.787
-36	108.625	114.106	103.144
-35	109.206	114.741	103.672
-34	109.93	115.526	104.333
-33	110.825	116.489	105.161
-32	111.978	117.726	106.23
-31	113.265	119.111	107.418
-30	114.727	120.686	108.769
-29	116.354	122.423	110.285
-28	118.156	124.372	111.939
-27	120.127	126.488	113.767
-26	122.327	128.851	115.804
-25	124.737	131.441	118.033
-24	127.448	134.355	120.54
-23	130.24	137.383	123.097
-22	133.252	140.647	125.858
-21	136.245	143.916	128.575
-20	139.484	147.45	131.519
-19	142.917	151.213	134.62
-18	146.486	155.143	137.828
-17	150.08	159.12	141.04
-16	153.726	163.18	144.272
-15	157.515	167.401	147.63
-14	161.363	171.713	151.012
-13	165.166	175.993	154.339
-12	169.081	180.404	157.759
-11	172.887	184.719	161.055
-10	176.715	189.055	164.375
-9	180.445	193.298	167.591
-8	184.164	197.525	170.802
-7	187.653	201.506	173.8
-6	191.124	205.443	176.805
-5	194.379	209.145	179.614
-4	197.48	212.662	182.298
-3	200.437	216.004	184.87
-2	203.145	219.054	187.237
-1	205.527	221.747	189.307
0	207.738	224.234	191.243
1	209.623	226.356	192.89
2	211.17	228.12	194.22
3	212.375	229.518	195.232
4	213.289	230.607	195.97
5	213.793	231.277	196.309
6	213.935	231.568	196.302
7	213.718	231.485	195.951
8	213.092	230.986	195.198
9	212.031	230.033	194.028
10	210.616	228.7	192.533
11	208.857	227.007	190.707
12	206.722	224.907	188.538
13	204.235	222.424	186.045
14	201.401	219.565	183.237
15	198.294	216.371	180.217
16	194.855	212.804	176.907
17	191.217	208.977	173.457
18	187.198	204.715	169.68
19	183.061	200.293	165.829
20	178.748	195.636	161.861
21	174.29	190.789	157.791
22	169.638	185.68	153.595
23	164.946	180.507	149.384
24	160.138	175.168	145.109
25	155.311	169.788	140.835
26	150.527	164.422	136.633
27	145.745	159.035	132.454
28	141.065	153.729	128.401
29	136.53	148.561	124.499
30	132.183	143.583	120.783
31	127.993	138.77	117.217
32	123.998	134.166	113.83
33	120.272	129.856	110.688
34	116.794	125.804	107.783
35	113.477	121.955	104.999
36	110.429	118.427	102.431
37	107.643	115.213	100.072
38	105.197	112.404	97.9908
39	102.88	109.776	95.9833
40	100.758	107.411	94.105
41	98.8688	105.361	92.3763
42	97.1421	103.538	90.7464
43	95.5485	101.899	89.1982
44	93.9512	100.291	87.6115
45	92.4551	98.8203	86.0899
46	91.0144	97.4218	84.607
47	89.596	96.0444	83.1475
48	88.2592	94.7459	81.7724
49	86.8452	93.3442	80.3463
50	85.4573	91.9497	78.965

## Sheet: E
Time (ms)	Mean value (red)	Upper s.e.m. value (red)	Lower s.e.m. (red)	Mean value (blue)	Upper s.e.m. value (blue)	Lower s.e.m. (blue)	Mean value (light blue)	Upper s.e.m. value (light blue)	Lower s.e.m. (light blue)
-50	26.8547	31.7412	21.9683	38.8226	41.0288	36.6163	44.4999	47.4557	41.5442
-49	26.9214	31.6873	22.1556	38.8916	41.1086	36.6746	44.2497	47.1662	41.3331
-48	27.1858	31.883	22.4886	39.0082	41.2372	36.7792	44.0095	46.8895	41.1295
-47	27.4164	32.1002	22.7327	39.1078	41.3477	36.8679	43.7854	46.6275	40.9433
-46	27.5527	32.2747	22.8306	39.24	41.4912	36.9888	43.5547	46.359	40.7503
-45	27.8788	32.695	23.0625	39.3771	41.6385	37.1158	43.3684	46.1325	40.6044
-44	28.2617	33.2498	23.2735	39.5078	41.7794	37.2362	43.1902	45.9116	40.4687
-43	28.5593	33.7664	23.3523	39.6525	41.9325	37.3725	43.0182	45.6968	40.3395
-42	28.8614	34.3477	23.3751	39.797	42.0849	37.509	42.8526	45.4858	40.2194
-41	29.1861	34.9537	23.4184	39.9373	42.229	37.6455	42.6704	45.2548	40.086
-40	29.4687	35.5438	23.3935	40.0532	42.3469	37.7596	42.5057	45.0414	39.9701
-39	29.6617	36.0644	23.2589	40.1643	42.4594	37.8691	42.323	44.8115	39.8345
-38	29.9235	36.6408	23.2061	40.2581	42.5514	37.9648	42.1555	44.5949	39.7161
-37	30.0963	37.1255	23.067	40.3538	42.6412	38.0664	41.9822	44.3754	39.589
-36	30.1836	37.505	22.8621	40.4421	42.7226	38.1616	41.7884	44.137	39.4399
-35	30.2906	37.8815	22.6997	40.494	42.765	38.223	41.5919	43.8986	39.2852
-34	30.3793	38.2114	22.5472	40.5189	42.7793	38.2585	41.3789	43.646	39.1117
-33	30.4726	38.5281	22.417	40.5441	42.7911	38.297	41.1488	43.3813	38.9162
-32	30.5641	38.7815	22.3467	40.5556	42.7896	38.3216	40.9102	43.1115	38.7088
-31	30.7668	39.1381	22.3956	40.5686	42.7917	38.3455	40.6476	42.8228	38.4723
-30	31.0086	39.4654	22.5518	40.5518	42.761	38.3426	40.4015	42.5526	38.2504
-29	31.1872	39.7002	22.6742	40.5288	42.7259	38.3317	40.1431	42.2727	38.0136
-28	31.3992	39.935	22.8634	40.5039	42.6876	38.3202	39.8792	41.9906	37.7679
-27	31.6509	40.1799	23.122	40.4676	42.6394	38.2958	39.6234	41.7193	37.5275
-26	31.9464	40.4434	23.4493	40.4056	42.568	38.2431	39.3645	41.4443	37.2848
-25	32.3025	40.7528	23.8522	40.3667	42.5189	38.2145	39.1224	41.1875	37.0573
-24	32.72	41.0956	24.3443	40.3163	42.4578	38.1748	38.8974	40.9481	36.8466
-23	33.1827	41.4749	24.8904	40.2672	42.3979	38.1366	38.6973	40.7319	36.6627
-22	33.7473	41.9615	25.533	40.2314	42.3524	38.1103	38.5085	40.5301	36.4869
-21	34.3097	42.4409	26.1785	40.1676	42.2761	38.059	38.306	40.3135	36.2984
-20	34.8646	42.922	26.8071	40.1027	42.1993	38.0061	38.1522	40.1469	36.1574
-19	35.5649	43.5904	27.5394	40.0651	42.1513	37.9788	38.0272	40.0089	36.0455
-18	36.2444	44.2318	28.2571	40.0024	42.0782	37.9266	37.9151	39.8838	35.9463
-17	36.9994	44.9794	29.0194	39.9298	41.9956	37.864	37.8051	39.7627	35.8474
-16	37.6775	45.6839	29.6711	39.853	41.9069	37.799	37.7024	39.6496	35.7551
-15	38.4145	46.4672	30.3619	39.7592	41.8026	37.7158	37.6152	39.5536	35.6769
-14	39.1421	47.2768	31.0075	39.6556	41.6892	37.622	37.5069	39.4358	35.5781
-13	39.9098	48.1534	31.6661	39.5488	41.5703	37.5274	37.3944	39.313	35.4758
-12	40.6071	48.9994	32.2148	39.4271	41.4379	37.4164	37.2846	39.1925	35.3766
-11	41.2825	49.8804	32.6845	39.2817	41.285	37.2784	37.1537	39.0511	35.2562
-10	41.9402	50.7588	33.1216	39.1235	41.1166	37.1304	36.9806	38.8648	35.0964
-9	42.6147	51.6283	33.6011	38.9724	40.9546	36.9902	36.7979	38.6693	34.9266
-8	43.1973	52.4141	33.9804	38.7844	40.7546	36.8142	36.5935	38.4503	34.7367
-7	43.7843	53.2186	34.35	38.5686	40.5258	36.6114	36.3444	38.1849	34.504
-6	44.255	53.8986	34.6114	38.3546	40.2983	36.4109	36.0773	37.9003	34.2544
-5	44.6646	54.5178	34.8114	38.1617	40.0935	36.2299	35.8035	37.6099	33.9972
-4	45.0112	55.0392	34.9831	37.9507	39.8658	36.0356	35.489	37.2816	33.6963
-3	45.28	55.4575	35.1024	37.727	39.6237	35.8304	35.1652	36.9436	33.3867
-2	45.4734	55.7756	35.1713	37.5189	39.3955	35.6424	34.8571	36.6231	33.0911
-1	45.6552	56.0853	35.2251	37.3172	39.1723	35.4621	34.5264	36.2801	32.7726
0	45.6876	56.2093	35.1659	37.1269	38.959	35.2949	34.2252	35.9686	32.4818
1	45.6793	56.2666	35.0921	36.9259	38.7346	35.1172	33.9259	35.6603	32.1916
2	45.86	56.603	35.1169	36.7689	38.5535	34.9843	33.6547	35.3835	31.926
3	45.9427	56.8204	35.0651	36.627	38.3862	34.8677	33.4139	35.1408	31.687
4	45.975	56.9965	34.9535	36.5117	38.2458	34.7777	33.2403	34.9667	31.5139
5	46.0748	57.2906	34.859	36.4293	38.1374	34.7211	33.0862	34.814	31.3583
6	46.1553	57.5851	34.7256	36.3697	38.0535	34.6859	32.9726	34.7035	31.2418
7	46.332	58.0473	34.6166	36.3205	37.9814	34.6597	32.9274	34.6643	31.1905
8	46.5735	58.5912	34.5557	36.2859	37.926	34.6459	32.9381	34.6808	31.1953
9	46.8311	59.1896	34.4726	36.3093	37.9303	34.6884	32.9917	34.742	31.2415
10	47.1683	59.902	34.4345	36.3529	37.9569	34.7489	33.1047	34.8624	31.3471
11	47.6163	60.7961	34.4366	36.4018	37.9927	34.8109	33.2504	35.0152	31.4855
12	48.1598	61.7931	34.5266	36.486	38.0679	34.904	33.4203	35.1918	31.6488
13	48.7663	62.8745	34.658	36.5944	38.1726	35.0163	33.6277	35.4067	31.8486
14	49.4301	64.029	34.8311	36.7204	38.2993	35.1414	33.8414	35.6275	32.0553
15	50.0984	65.167	35.0297	36.8565	38.441	35.272	34.0668	35.8603	32.2734
16	50.8754	66.4659	35.285	36.9833	38.5766	35.3899	34.2941	36.093	32.4951
17	51.6901	67.7892	35.5909	37.1272	38.7338	35.5207	34.5152	36.32	32.7105
18	52.5739	69.1697	35.9782	37.2512	38.8749	35.6276	34.7334	36.5434	32.9234
19	53.473	70.5516	36.3944	37.3661	39.0066	35.7256	34.9345	36.7502	33.1189
20	54.3776	71.9195	36.8357	37.4719	39.1329	35.8108	35.1175	36.9378	33.2971
21	55.1748	73.1654	37.1843	37.5384	39.2181	35.8587	35.2464	37.0718	33.4209
22	55.9963	74.4015	37.5911	37.5605	39.2576	35.8633	35.3569	37.1886	33.5251
23	56.7704	75.5563	37.9845	37.5372	39.2519	35.8225	35.4351	37.2733	33.597
24	57.4851	76.6115	38.3587	37.493	39.2211	35.7649	35.479	37.3234	33.6347
25	58.0841	77.5187	38.6495	37.4011	39.1385	35.6636	35.4755	37.3315	33.6196
26	58.6709	78.3543	38.9874	37.2534	38.9962	35.5105	35.4383	37.3054	33.5712
27	59.1756	79.03	39.3211	37.0395	38.7839	35.295	35.3712	37.2516	33.4909
28	59.485	79.4113	39.5586	36.7505	38.4915	35.0095	35.2666	37.1613	33.372
29	59.7017	79.6661	39.7373	36.3979	38.132	34.6638	35.1085	37.019	33.198
30	59.8997	79.8192	39.9801	35.9895	37.7128	34.2662	34.9148	36.8421	32.9874
31	60.073	79.9309	40.2152	35.5098	37.2188	33.8008	34.6894	36.6334	32.7453
32	60.1363	79.7744	40.4983	34.9792	36.6697	33.2887	34.4178	36.3769	32.4587
33	60.0357	79.4264	40.645	34.3892	36.0597	32.7186	34.1125	36.0846	32.1405
34	59.7162	78.744	40.6884	33.7486	35.3978	32.0993	33.7605	35.7433	31.7777
35	59.3846	77.979	40.7903	33.0442	34.6719	31.4165	33.3678	35.3584	31.3773
36	58.947	77.0415	40.8525	32.2941	33.8994	30.6888	32.9402	34.9349	30.9455
37	58.3719	75.9191	40.8248	31.5057	33.0889	29.9225	32.4732	34.4674	30.479
38	57.7162	74.6836	40.7487	30.6981	32.2606	29.1356	31.9859	33.9764	29.9954
39	57.0395	73.4086	40.6704	29.8669	31.4104	28.3235	31.4709	33.455	29.4869
40	56.2156	71.9536	40.4776	29.0057	30.5321	27.4794	30.9188	32.892	28.9456
41	55.4681	70.6315	40.3047	28.1433	29.6538	26.6328	30.3604	32.3201	28.4007
42	54.6748	69.3125	40.0372	27.282	28.7799	25.7841	29.7929	31.7367	27.8491
43	53.9629	68.1147	39.811	26.4242	27.9122	24.9361	29.2247	31.1526	27.2969
44	53.2413	66.978	39.5046	25.5738	27.0539	24.0936	28.6583	30.5701	26.7466
45	52.6372	66.0566	39.2177	24.73	26.2048	23.2552	28.1017	29.9993	26.2042
46	52.0873	65.2777	38.8969	23.8976	25.3661	22.4291	27.5552	29.4409	25.6696
47	51.7153	64.7528	38.6778	23.0878	24.5501	21.6254	27.0435	28.9185	25.1685
48	51.3791	64.3302	38.428	22.2966	23.7549	20.8383	26.5663	28.4299	24.7026
49	51.3112	64.3341	38.2883	21.5507	23.0036	20.0977	26.1214	27.9777	24.2652
50	51.3178	64.4553	38.1803	20.819	22.2639	19.3742	25.7274	27.5758	23.879
51	51.5493	64.881	38.2176	20.1339	21.5697	18.6981	25.3868	27.2297	23.5438
52	51.9031	65.4704	38.3358	19.4864	20.9103	18.0624	25.0714	26.9101	23.2328
53	52.5792	66.4633	38.6951	18.8777	20.2884	17.467	24.8181	26.6523	22.984
54	53.3249	67.5537	39.0962	18.2975	19.6929	16.902	24.6345	26.4634	22.8056
55	54.2165	68.8484	39.5846	17.7846	19.1652	16.4041	24.4917	26.314	22.6693
56	55.3409	70.4348	40.247	17.3218	18.6858	15.9578	24.41	26.2261	22.594
57	56.5377	72.071	41.0043	16.9028	18.252	15.5536	24.3644	26.1735	22.5553
58	57.7884	73.7686	41.8082	16.5633	17.897	15.2295	24.3769	26.1786	22.5752
59	59.1139	75.5407	42.6872	16.2772	17.5972	14.9572	24.4322	26.2264	22.6379
60	60.5347	77.4019	43.6676	16.0493	17.3619	14.7368	24.5402	26.3263	22.754
61	61.8533	79.1366	44.57	15.8918	17.2001	14.5834	24.7019	26.4798	22.9239
62	63.3073	80.9861	45.6285	15.8273	17.1384	14.5163	24.8936	26.6669	23.1204
63	64.7441	82.7929	46.6952	15.8148	17.1336	14.496	25.094	26.8627	23.3252
64	66.1473	84.52	47.7746	15.887	17.22	14.5541	25.3443	27.1111	23.5775
65	67.503	86.1972	48.8088	16.0245	17.3781	14.6709	25.6362	27.4026	23.8697
66	68.7995	87.8063	49.7926	16.2365	17.6131	14.8599	25.9432	27.7128	24.1737
67	70.0427	89.3787	50.7067	16.509	17.9113	15.1067	26.2685	28.042	24.4951
68	71.2707	90.914	51.6273	16.836	18.2663	15.4057	26.6064	28.3852	24.8276
69	72.3198	92.2527	52.3868	17.2312	18.6898	15.7726	26.9441	28.7301	25.1582
70	73.2428	93.4621	53.0236	17.7022	19.1892	16.2151	27.2964	29.0912	25.5015
71	74.1785	94.7429	53.614	18.2271	19.7407	16.7135	27.6838	29.4879	25.8796
72	75.1252	96.0897	54.1606	18.7863	20.3242	17.2484	28.0665	29.8797	26.2534
73	75.8813	97.2271	54.5355	19.4213	20.9797	17.8629	28.4817	30.3052	26.6581
74	76.5926	98.3469	54.8384	20.1036	21.6807	18.5265	28.9007	30.7341	27.0672
75	77.1712	99.3288	55.0136	20.8269	22.4191	19.2347	29.3203	31.1645	27.4761
76	77.6577	100.221	55.094	21.5749	23.179	19.9707	29.7652	31.6192	27.9112
77	78.0481	101.069	55.0274	22.3633	23.9761	20.7506	30.213	32.0764	28.3496
78	78.2936	101.708	54.8795	23.1791	24.7983	21.5599	30.6607	32.5342	28.7872
79	78.49	102.293	54.687	24.0315	25.6541	22.4088	31.1121	32.9958	29.2285
80	78.6932	102.889	54.4975	24.9007	26.5241	23.2774	31.5884	33.4806	29.6963
81	78.8053	103.324	54.2861	25.8116	27.4368	24.1864	32.0737	33.9751	30.1723
82	78.7748	103.604	53.9454	26.7325	28.3565	25.1086	32.5624	34.4712	30.6536
83	78.5926	103.683	53.5023	27.6362	29.2589	26.0135	33.052	34.9678	31.1362
84	78.4858	103.813	53.1582	28.5743	30.1934	26.9552	33.5725	35.4967	31.6482
85	78.1771	103.708	52.6464	29.5088	31.1259	27.8917	34.1063	36.0397	32.1729
86	77.8106	103.5	52.1215	30.4463	32.0598	28.8327	34.657	36.5999	32.714
87	77.385	103.201	51.5692	31.3736	32.9847	29.7625	35.214	37.165	33.2631
88	76.9157	102.831	51.0003	32.2725	33.8813	30.6637	35.7845	37.7426	33.8264
89	76.4191	102.412	50.4258	33.1579	34.766	31.5497	36.3838	38.3507	34.417
90	76.0017	102.068	49.9353	34.0187	35.6259	32.4116	36.9626	38.9359	34.9894
91	75.4935	101.646	49.3411	34.836	36.4416	33.2304	37.555	39.5366	35.5734
92	75.0837	101.306	48.8615	35.6185	37.2241	34.0128	38.1355	40.1235	36.1476
93	74.7719	101.07	48.4733	36.3545	37.9613	34.7478	38.7256	40.7169	36.7343
94	74.47	100.854	48.0865	37.0454	38.6538	35.437	39.3028	41.2972	37.3083
95	74.3642	100.902	47.8266	37.6996	39.3097	36.0895	39.8615	41.8585	37.8645
96	74.3186	100.922	47.715	38.2897	39.9001	36.6793	40.4286	42.4261	38.4311
97	74.4262	101.148	47.7048	38.8399	40.4498	37.23	40.9581	42.9561	38.9602
98	74.6467	101.506	47.7875	39.3201	40.9285	37.7116	41.4484	43.4437	39.453
99	74.9198	101.89	47.9495	39.7609	41.3675	38.1544	41.929	43.9237	39.9342
100	75.2215	102.261	48.1823	40.1289	41.7313	38.5264	42.3686	44.3602	40.3769
101	75.5933	102.717	48.4698	40.4431	42.0398	38.8463	42.7792	44.7665	40.7919
102	76.0729	103.302	48.8441	40.6959	42.2862	39.1055	43.1402	45.1245	41.1559
103	76.6396	103.941	49.3384	40.9192	42.5024	39.3361	43.4484	45.4301	41.4667
104	77.1112	104.436	49.7859	41.0727	42.6491	39.4964	43.7306	45.7074	41.7539
105	77.5637	104.839	50.2886	41.1947	42.7647	39.6247	43.9607	45.9331	41.9884
106	77.9694	105.159	50.7799	41.2545	42.8191	39.6899	44.1419	46.1094	42.1745
107	78.4646	105.553	51.3761	41.2913	42.8521	39.7304	44.2895	46.2542	42.3248
108	78.7402	105.712	51.7681	41.2696	42.8289	39.7103	44.4297	46.3919	42.4675
109	78.9683	105.784	52.1523	41.2264	42.786	39.6668	44.5116	46.4735	42.5497
110	79.0171	105.641	52.3932	41.169	42.7316	39.6065	44.5498	46.5105	42.5892
111	78.9778	105.372	52.5834	41.0883	42.6553	39.5214	44.5729	46.5317	42.6141
112	78.6967	104.813	52.581	40.9803	42.5555	39.4051	44.5747	46.5327	42.6167
113	78.4473	104.219	52.6755	40.8907	42.4745	39.3068	44.5509	46.5091	42.5926
114	78.0144	103.474	52.5552	40.7674	42.3616	39.1731	44.5222	46.4798	42.5647
115	77.465	102.601	52.3288	40.6605	42.2663	39.0546	44.4673	46.4262	42.5084
116	76.7659	101.554	51.9779	40.5842	42.2016	38.9668	44.425	46.3823	42.4677
117	75.9567	100.343	51.5704	40.5106	42.1398	38.8814	44.3984	46.3536	42.4432
118	75.2127	99.2241	51.2013	40.4752	42.1153	38.8352	44.3457	46.2994	42.3921
119	74.3067	97.9061	50.7072	40.4447	42.0951	38.7943	44.3099	46.2607	42.359
120	73.3008	96.466	50.1356	40.4451	42.107	38.7831	44.2583	46.2074	42.3092
121	72.3129	95.0119	49.6139	40.459	42.1294	38.7887	44.2366	46.1836	42.2897
122	71.3608	93.5722	49.1494	40.5288	42.2087	38.8488	44.2242	46.1691	42.2794
123	70.302	91.969	48.635	40.6357	42.3256	38.9457	44.2195	46.1611	42.2778
124	69.2965	90.4356	48.1574	40.7936	42.491	39.0961	44.2066	46.1485	42.2647
125	68.3139	88.8606	47.7673	40.9777	42.6821	39.2734	44.2292	46.1707	42.2878
126	67.3225	87.2949	47.3501	41.1961	42.9056	39.4866	44.2433	46.1877	42.2989
127	66.4931	85.875	47.1112	41.4323	43.145	39.7197	44.2824	46.2305	42.3344
128	65.6768	84.4614	46.8923	41.6893	43.4033	39.9753	44.3216	46.2754	42.3678
129	64.9123	83.0871	46.7375	41.9855	43.7003	40.2707	44.3613	46.3226	42.4
130	64.2064	81.7656	46.6471	42.2975	44.0124	40.5827	44.3854	46.3578	42.413
131	63.4747	80.3635	46.5859	42.6273	44.3422	40.9125	44.4503	46.4369	42.4637
132	62.9788	79.2671	46.6905	42.9487	44.663	41.2343	44.475	46.4767	42.4732
133	62.5155	78.2245	46.8065	43.2779	44.9885	41.5674	44.5032	46.5215	42.485
134	62.0833	77.198	46.9687	43.6024	45.3121	41.8927	44.5245	46.5623	42.4867
135	61.7635	76.3427	47.1844	43.9122	45.6211	42.2034	44.5418	46.5994	42.4842
136	61.446	75.4872	47.4049	44.2239	45.9328	42.515	44.5546	46.6321	42.4772
137	61.3406	74.9454	47.7358	44.504	46.2129	42.795	44.5544	46.6533	42.4555
138	61.1923	74.3487	48.0358	44.7456	46.4573	43.0339	44.5595	46.676	42.4431
139	60.9893	73.7413	48.2372	44.9561	46.6707	43.2414	44.5611	46.6982	42.424
140	60.8154	73.2519	48.3789	45.1373	46.8549	43.4198	44.5467	46.6984	42.3951
141	60.695	72.8058	48.5842	45.2751	46.9976	43.5527	44.5513	46.7185	42.3841
142	60.5966	72.442	48.7513	45.3996	47.1266	43.6725	44.539	46.7189	42.3591
143	60.3154	71.9003	48.7306	45.4665	47.1964	43.7366	44.5325	46.7189	42.346
144	60.0954	71.4642	48.7265	45.4903	47.2221	43.7585	44.5308	46.7189	42.3427
145	59.8483	71.0419	48.6546	45.4889	47.2207	43.7571	44.5344	46.7217	42.347
146	59.5064	70.5387	48.474	45.4657	47.1965	43.7348	44.5454	46.7257	42.3651
147	59.1815	70.0692	48.2939	45.4303	47.1615	43.6992	44.5641	46.7312	42.397
148	58.6693	69.4151	47.9235	45.359	47.0876	43.6304	44.5922	46.7404	42.4441
149	57.9829	68.5822	47.3836	45.2537	46.9808	43.5266	44.6631	46.7884	42.5379
150	57.3241	67.8095	46.8386	45.1501	46.8775	43.4227	44.7351	46.8308	42.6395
151	56.5639	66.9423	46.1855	45.0296	46.7556	43.3036	44.8404	46.9034	42.7774
152	55.7093	65.9914	45.4272	44.8907	46.6142	43.1671	44.9486	46.9787	42.9185
153	54.8281	65.0507	44.6055	44.7441	46.4653	43.023	45.0816	47.0754	43.0878
154	53.7414	63.8761	43.6067	44.5795	46.2997	42.8594	45.2571	47.2163	43.2979
155	52.6604	62.7704	42.5504	44.4396	46.1585	42.7206	45.4538	47.3809	43.5267
156	51.5345	61.619	41.4501	44.278	45.9952	42.5608	45.6871	47.586	43.7881
157	50.3286	60.3946	40.2626	44.1119	45.8299	42.3939	45.9576	47.8371	44.0781
158	49.3153	59.4714	39.1591	43.9298	45.6484	42.2113	46.2316	48.097	44.3662
159	48.2489	58.4994	37.9985	43.76	45.4781	42.0418	46.5309	48.3905	44.6713
160	47.1319	57.4645	36.7994	43.5899	45.3072	41.8725	46.8622	48.7268	44.9976
161	45.9767	56.3767	35.5767	43.4219	45.1374	41.7064	47.2042	49.0785	45.3299
162	44.9098	55.4197	34.3998	43.2399	44.952	41.5278	47.5778	49.4724	45.6831
163	43.8828	54.4761	33.2894	43.0546	44.7622	41.3471	47.9583	49.8784	46.0382
164	42.8907	53.5569	32.2246	42.8662	44.5698	41.1627	48.3357	50.2881	46.3834
165	42.002	52.7275	31.2764	42.6994	44.3973	41.0015	48.6986	50.6891	46.7082
166	41.0354	51.8128	30.2581	42.517	44.208	40.8259	49.0839	51.1173	47.0504
167	40.3171	51.1429	29.4914	42.365	44.0504	40.6797	49.4381	51.5141	47.3622
168	39.6357	50.4967	28.7748	42.2237	43.9026	40.5449	49.7723	51.8925	47.652
169	39.0274	49.9208	28.1339	42.0858	43.7618	40.4097	50.1106	52.2744	47.9467
170	38.4973	49.4225	27.5721	41.9735	43.6459	40.3011	50.4236	52.6304	48.2168
171	38.0488	49.0061	27.0916	41.8979	43.5655	40.2303	50.6964	52.9441	48.4486
172	37.5944	48.6053	26.5835	41.8061	43.4735	40.1387	50.919	53.2037	48.6342
173	37.3932	48.4622	26.3243	41.7763	43.4444	40.1082	51.1278	53.4459	48.8096
174	37.1365	48.201	26.0719	41.7666	43.4376	40.0956	51.3045	53.6507	48.9583
175	37.0656	48.1668	25.9645	41.7643	43.4377	40.091	51.4084	53.7775	49.0392
176	37.1169	48.275	25.9588	41.7892	43.4671	40.1113	51.4922	53.8794	49.1051
177	37.1549	48.3504	25.9593	41.8125	43.4952	40.1297	51.5395	53.9411	49.1379
178	37.2723	48.4473	26.0974	41.8946	43.5847	40.2045	51.5392	53.9512	49.1272
179	37.4869	48.6561	26.3177	41.9831	43.6796	40.2867	51.5221	53.9376	49.1066
180	37.6855	48.8298	26.5412	42.0884	43.791	40.3859	51.4848	53.9024	49.0672
181	37.913	48.9929	26.8331	42.1968	43.9044	40.4893	51.4311	53.8474	49.0147
182	38.1987	49.2251	27.1723	42.32	44.0316	40.6084	51.3811	53.797	48.9653
183	38.471	49.4246	27.5174	42.4407	44.1571	40.7243	51.2953	53.7104	48.8803
184	38.6728	49.5309	27.8148	42.5797	44.3006	40.8588	51.1765	53.5927	48.7603
185	39.0699	49.843	28.2968	42.724	44.451	40.9969	51.0902	53.5102	48.6702
186	39.263	49.9083	28.6176	42.8801	44.615	41.1452	51.0147	53.4394	48.5901
187	39.4772	50.0118	28.9426	43.0406	44.7851	41.2962	50.9275	53.3621	48.493
188	39.6324	50.0434	29.2215	43.1623	44.9164	41.4082	50.8621	53.312	48.4122
189	39.7247	50.0006	29.4487	43.2987	45.064	41.5335	50.8106	53.2789	48.3423
190	39.7514	49.8826	29.6202	43.4291	45.2056	41.6526	50.7504	53.2418	48.2591
191	39.6675	49.6468	29.6883	43.5524	45.3408	41.7639	50.7232	53.2387	48.2078
192	39.5299	49.3498	29.71	43.679	45.4837	41.8743	50.7229	53.2696	48.1761
193	39.3824	49.0402	29.7247	43.8088	45.6301	41.9876	50.732	53.3108	48.1532
194	39.1709	48.6674	29.6745	43.9323	45.7708	42.0938	50.7575	53.3712	48.1439
195	38.961	48.3177	29.6043	44.0332	45.887	42.1794	50.808	53.4615	48.1544
196	38.5713	47.7472	29.3954	44.133	46.0012	42.2647	50.8843	53.5781	48.1904
197	38.2101	47.2509	29.1692	44.2186	46.0985	42.3386	50.9481	53.6825	48.2137
198	37.8676	46.8016	28.9335	44.3046	46.1958	42.4134	51.0239	53.8024	48.2453
199	37.4931	46.3346	28.6517	44.3611	46.2572	42.465	51.1266	53.95	48.3032
200	37.1537	45.8905	28.4169	44.394	46.2935	42.4945	51.2218	54.0886	48.3549

## Sheet: J
Time (ms)	Mean value (red)	Upper s.e.m. value (red)	Lower s.e.m. (red)	Mean value (blue)	Upper s.e.m. value (blue)	Lower s.e.m. (blue)	Mean value (light blue)	Upper s.e.m. value (light blue)	Lower s.e.m. (light blue)
-50	82.1306	88.6057	75.6555	85.0173	89.4166	80.618	76.5022	79.985	73.0194
-49	82.8329	89.2833	76.3824	84.3917	88.7281	80.0553	76.4912	79.9809	73.0015
-48	83.5825	90.0155	77.1496	83.7554	88.0307	79.48	76.4871	79.9834	72.9909
-47	84.4273	90.8474	78.0072	83.1497	87.3651	78.9343	76.4705	79.9754	72.9656
-46	85.3264	91.721	78.9318	82.5813	86.7396	78.423	76.4471	79.9629	72.9313
-45	86.1945	92.5683	79.8208	82.0318	86.1354	77.9283	76.4557	79.9841	72.9273
-44	87.1765	93.5437	80.8093	81.4985	85.549	77.448	76.4786	80.0198	72.9375
-43	88.2171	94.568	81.8663	81.0203	85.0189	77.0217	76.5031	80.0546	72.9516
-42	89.2696	95.6192	82.9199	80.5785	84.5277	76.6293	76.5221	80.0851	72.9591
-41	90.3519	96.699	84.0048	80.1754	84.0757	76.2752	76.5614	80.1343	72.9886
-40	91.4122	97.7674	85.057	79.8266	83.6803	75.9728	76.621	80.2032	73.0388
-39	92.5533	98.9351	86.1715	79.5222	83.3279	75.7164	76.685	80.2751	73.095
-38	93.7065	100.13	87.2829	79.2843	83.0427	75.5258	76.7589	80.3552	73.1626
-37	94.8991	101.377	88.4217	79.0611	82.7706	75.3516	76.8334	80.4328	73.234
-36	96.0904	102.626	89.5545	78.8992	82.5581	75.2403	76.9077	80.5084	73.307
-35	97.3028	103.909	90.6965	78.7722	82.3798	75.1646	76.9684	80.5673	73.3695
-34	98.4526	105.137	91.7685	78.702	82.2547	75.1493	77.0249	80.6205	73.4294
-33	99.6714	106.43	92.9129	78.634	82.1288	75.1392	77.0313	80.6189	73.4436
-32	100.857	107.684	94.0295	78.5829	82.0165	75.1493	77.0339	80.612	73.4557
-31	102.038	108.929	95.1473	78.562	81.9318	75.1923	76.9853	80.5502	73.4204
-30	103.089	110.025	96.1528	78.5371	81.8394	75.2348	76.9391	80.4915	73.3868
-29	104.129	111.099	97.1595	78.5277	81.7592	75.2962	76.8427	80.3803	73.3051
-28	105.062	112.042	98.0819	78.5408	81.7	75.3816	76.7408	80.2606	73.221
-27	106.012	112.988	99.0366	78.5305	81.6171	75.4438	76.5854	80.0885	73.0823
-26	106.853	113.799	99.9057	78.5189	81.5294	75.5084	76.4029	79.8866	72.9193
-25	107.565	114.476	100.653	78.4626	81.4011	75.524	76.152	79.6142	72.6899
-24	108.199	115.058	101.341	78.392	81.2601	75.5239	75.8921	79.3351	72.4491
-23	108.756	115.549	101.963	78.2853	81.0869	75.4838	75.6163	79.0375	72.195
-22	109.249	115.97	102.527	78.1407	80.8782	75.4031	75.3276	78.7275	71.9277
-21	109.619	116.257	102.981	77.9862	80.6648	75.3076	75.0617	78.4393	71.6842
-20	109.877	116.428	103.325	77.8171	80.4443	75.1899	74.7333	78.0858	71.3808
-19	110.068	116.534	103.602	77.6429	80.223	75.0628	74.4367	77.7658	71.1076
-18	110.151	116.533	103.77	77.4138	79.9521	74.8754	74.1358	77.4389	70.8327
-17	110.16	116.452	103.868	77.1945	79.6992	74.6897	73.8591	77.1367	70.5815
-16	109.99	116.191	103.789	76.9481	79.424	74.4722	73.5905	76.8434	70.3376
-15	109.768	115.907	103.629	76.7135	79.1638	74.2632	73.3189	76.5437	70.0942
-14	109.492	115.573	103.411	76.4526	78.882	74.0233	73.0779	76.2753	69.8805
-13	109.157	115.2	103.114	76.198	78.6094	73.7866	72.8533	76.0256	69.6811
-12	108.812	114.805	102.819	75.9476	78.3433	73.5518	72.6525	75.7982	69.5067
-11	108.397	114.367	102.427	75.6746	78.0559	73.2932	72.4596	75.5818	69.3375
-10	108.046	114.002	102.089	75.395	77.7617	73.0284	72.2942	75.3922	69.1963
-9	107.647	113.617	101.677	75.1113	77.4649	72.7578	72.1279	75.2046	69.0512
-8	107.238	113.224	101.252	74.8329	77.1749	72.4909	71.9578	75.0136	68.9019
-7	106.965	112.994	100.936	74.5735	76.9039	72.2432	71.8238	74.8595	68.7882
-6	106.74	112.822	100.658	74.313	76.6315	71.9944	71.7062	74.7231	68.6893
-5	106.653	112.79	100.516	74.0448	76.3545	71.7351	71.5955	74.5923	68.5986
-4	106.678	112.888	100.469	73.762	76.0645	71.4595	71.5108	74.4873	68.5343
-3	106.722	113.009	100.435	73.524	75.8193	71.2287	71.44	74.3966	68.4835
-2	106.94	113.305	100.574	73.2586	75.5493	70.968	71.3709	74.3066	68.4352
-1	107.17	113.617	100.724	73.0233	75.3134	70.7332	71.3169	74.2293	68.4044
0	107.676	114.204	101.148	72.7884	75.0801	70.4968	71.2615	74.1483	68.3748
1	108.195	114.811	101.58	72.5535	74.8479	70.2591	71.2492	74.1094	68.3891
2	108.821	115.512	102.129	72.3327	74.6347	70.0307	71.246	74.077	68.4149
3	109.501	116.261	102.741	72.1288	74.4376	69.82	71.2207	74.023	68.4183
4	110.463	117.28	103.647	71.9297	74.2479	69.6114	71.2345	74.0043	68.4647
5	111.328	118.191	104.464	71.7468	74.0759	69.4177	71.2571	73.9964	68.5178
6	112.288	119.201	105.375	71.598	73.9372	69.2588	71.2755	73.9841	68.5669
7	113.285	120.226	106.344	71.4684	73.8202	69.1166	71.3056	73.9853	68.626
8	114.429	121.41	107.448	71.3599	73.7246	68.9952	71.3276	73.9772	68.678
9	115.581	122.585	108.578	71.2827	73.6595	68.9058	71.3477	73.9722	68.7232
10	116.853	123.881	109.824	71.2292	73.6204	68.8379	71.3842	73.9823	68.7861
11	117.959	125.011	110.906	71.2235	73.627	68.8199	71.412	73.9886	68.8355
12	119.212	126.295	112.13	71.2447	73.6601	68.8294	71.4388	73.9966	68.881
13	120.536	127.674	113.397	71.2884	73.7146	68.8622	71.4632	74.0051	68.9212
14	121.911	129.108	114.714	71.3562	73.7933	68.9191	71.4716	73.9995	68.9437
15	123.262	130.547	115.976	71.4554	73.9042	69.0065	71.4898	74.0075	68.9721
16	124.686	132.1	117.272	71.5901	74.0516	69.1287	71.4929	74.0024	68.9833
17	126.223	133.801	118.645	71.7449	74.217	69.2729	71.484	73.9935	68.9746
18	127.842	135.628	120.056	71.9258	74.4094	69.4422	71.4512	73.9618	68.9407
19	129.625	137.662	121.588	72.12	74.6154	69.6247	71.4159	73.9311	68.9008
20	131.52	139.848	123.192	72.2952	74.8008	69.7896	71.3623	73.8843	68.8403
21	133.481	142.164	124.798	72.4856	74.9987	69.9726	71.2924	73.824	68.7609
22	135.591	144.669	126.513	72.6899	75.2118	70.168	71.236	73.7794	68.6925
23	137.821	147.345	128.297	72.8444	75.3742	70.3146	71.1465	73.7015	68.5915
24	140.115	150.109	130.122	72.9951	75.5337	70.4565	71.0399	73.6071	68.4727
25	142.704	153.197	132.211	73.1094	75.6567	70.5621	70.9216	73.5022	68.3409
26	145.243	156.265	134.221	73.2115	75.7669	70.6561	70.7904	73.3819	68.199
27	147.891	159.455	136.328	73.2552	75.8181	70.6922	70.6229	73.2253	68.0204
28	150.583	162.705	138.462	73.227	75.7974	70.6567	70.4422	73.0543	67.83
29	153.399	166.066	140.732	73.1552	75.7328	70.5776	70.2217	72.8401	67.6034
30	156.223	169.421	143.025	72.9797	75.5615	70.3979	69.9776	72.6018	67.3534
31	159.091	172.821	145.361	72.749	75.336	70.1621	69.6973	72.3242	67.0705
32	161.834	176.058	147.61	72.4454	75.0355	69.8554	69.4077	72.0365	66.7789
33	164.561	179.237	149.884	72.0453	74.6375	69.453	69.0908	71.7189	66.4627
34	167.204	182.281	152.126	71.5843	74.1756	68.9931	68.7887	71.4158	66.1616
35	169.78	185.211	154.35	71.0261	73.6126	68.4397	68.4517	71.0742	65.8292
36	172.218	187.955	156.481	70.3867	72.9658	67.8076	68.1084	70.723	65.4939
37	174.399	190.376	158.422	69.6671	72.2375	67.0968	67.757	70.3633	65.1508
38	176.429	192.602	160.256	68.8884	71.4471	66.3297	67.3982	69.9947	64.8016
39	178.257	194.547	161.966	68.0455	70.5902	65.5008	67.1054	69.6892	64.5217
40	179.845	196.189	163.502	67.1282	69.6562	64.6002	66.8019	69.3703	64.2335
41	181.147	197.482	164.812	66.2106	68.7227	63.6985	66.5297	69.0818	63.9775
42	182.201	198.476	165.925	65.2383	67.7316	62.745	66.2576	68.793	63.7223
43	182.977	199.139	166.815	64.27	66.7446	61.7954	66.0187	68.5369	63.5004
44	183.538	199.523	167.554	63.2813	65.7385	60.8241	65.8157	68.317	63.3144
45	183.757	199.523	167.992	62.3075	64.7477	59.8673	65.6405	68.1246	63.1565
46	183.604	199.116	168.091	61.3463	63.7695	58.9231	65.5167	67.9871	63.0463
47	183.174	198.419	167.93	60.4169	62.8256	58.0082	65.3823	67.8415	62.9231
48	182.476	197.433	167.519	59.5577	61.953	57.1624	65.2988	67.7499	62.8478
49	181.584	196.249	166.919	58.7653	61.1509	56.3796	65.214	67.6612	62.7667
50	180.463	194.833	166.093	58.033	60.4123	55.6537	65.1689	67.6155	62.7222
51	179.086	193.194	164.978	57.3785	59.7536	55.0034	65.1455	67.5934	62.6975
52	177.457	191.313	163.601	56.8103	59.1839	54.4368	65.1156	67.5676	62.6636
53	175.635	189.289	161.981	56.3513	58.7273	53.9753	65.1065	67.5633	62.6498
54	173.743	187.214	160.271	55.9967	58.374	53.6194	65.0958	67.5583	62.6333
55	171.673	185.015	158.33	55.7537	58.136	53.3714	65.0927	67.5621	62.6232
56	169.509	182.771	156.248	55.6068	57.9936	53.2201	65.097	67.5708	62.6232
57	167.267	180.481	154.053	55.5853	57.9777	53.1928	65.1269	67.6025	62.6513
58	165.036	178.259	151.813	55.6448	58.0451	53.2446	65.1462	67.6217	62.6708
59	162.646	175.901	149.391	55.8308	58.2398	53.4219	65.2024	67.6767	62.728
60	160.392	173.711	147.073	56.1097	58.5254	53.6941	65.2579	67.7298	62.7861
61	158.106	171.484	144.729	56.5072	58.9284	54.0861	65.3512	67.8187	62.8838
62	155.851	169.302	142.4	56.9865	59.416	54.5571	65.4883	67.9485	63.0281
63	153.578	167.09	140.067	57.5862	60.0238	55.1486	65.6553	68.1073	63.2032
64	151.489	165.046	137.931	58.2571	60.7026	55.8115	65.8438	68.2891	63.3985
65	149.392	162.969	135.815	59.0429	61.4965	56.5893	66.092	68.5315	63.6525
66	147.391	160.967	133.814	59.8845	62.3444	57.4247	66.3749	68.8085	63.9413
67	145.433	158.963	131.902	60.852	63.319	58.385	66.7624	69.1943	64.3304
68	143.602	157.06	130.144	61.8807	64.3559	59.4056	67.1502	69.5806	64.7198
69	141.799	155.149	128.449	62.9833	65.4657	60.5009	67.6036	70.034	65.1732
70	140.217	153.431	127.003	64.1552	66.6451	61.6652	68.0876	70.5183	65.6569
71	138.681	151.72	125.641	65.4196	67.9179	62.9212	68.63	71.0629	66.197
72	137.231	150.065	124.397	66.7133	69.2179	64.2087	69.2267	71.6607	66.7926
73	135.86	148.488	123.231	68.0997	70.6131	65.5862	69.8532	72.2904	67.4161
74	134.631	147.036	122.225	69.5276	72.05	67.0052	70.4932	72.9306	68.0559
75	133.424	145.602	121.247	70.9846	73.516	68.4531	71.1945	73.6338	68.7551
76	132.259	144.218	120.3	72.4788	75.0224	69.9352	71.9159	74.3573	69.4744
77	131.142	142.889	119.394	74.0127	76.5692	71.4562	72.6345	75.0759	70.1931
78	130.055	141.608	118.501	75.5456	78.118	72.9732	73.3518	75.7941	70.9095
79	128.953	140.324	117.581	77.0838	79.6748	74.4928	74.0863	76.5305	71.6421
80	127.883	139.102	116.664	78.5789	81.1921	75.9657	74.8139	77.2626	72.3653
81	126.834	137.92	115.749	80.0539	82.6923	77.4155	75.5069	77.9611	73.0528
82	125.745	136.731	114.759	81.5101	84.177	78.8431	76.1948	78.6565	73.7331
83	124.71	135.619	113.802	82.8743	85.5721	80.1766	76.8549	79.3267	74.3831
84	123.51	134.373	112.646	84.1638	86.893	81.4345	77.4628	79.9479	74.9776
85	122.438	133.277	111.599	85.3756	88.1369	82.6144	78.0528	80.5566	75.5489
86	121.36	132.192	110.528	86.5018	89.2976	83.706	78.6116	81.1353	76.0879
87	120.205	131.051	109.359	87.5099	90.3385	84.6812	79.0926	81.6398	76.5454
88	119.028	129.91	108.146	88.4077	91.2684	85.5471	79.5311	82.1023	76.9599
89	117.852	128.796	106.908	89.2213	92.1113	86.3312	79.9349	82.5317	77.3381
90	116.655	127.696	105.614	89.869	92.784	86.954	80.2695	82.8911	77.6479
91	115.508	126.668	104.349	90.3813	93.3153	87.4473	80.544	83.1878	77.9001
92	114.372	125.67	103.075	90.7729	93.7225	87.8234	80.7727	83.4369	78.1086
93	113.28	124.754	101.807	91.0448	94.0023	88.0873	80.942	83.6234	78.2606
94	112.221	123.894	100.548	91.1889	94.1498	88.2281	81.0552	83.7489	78.3616
95	111.199	123.092	99.3068	91.2081	94.1664	88.2497	81.1238	83.8246	78.4229
96	110.244	122.372	98.1158	91.132	94.0802	88.1837	81.125	83.8296	78.4204
97	109.355	121.733	96.9774	90.921	93.8544	87.9876	81.0766	83.7796	78.3736
98	108.497	121.144	95.8504	90.6049	93.5181	87.6917	80.964	83.6629	78.2651
99	107.715	120.639	94.7905	90.2174	93.1061	87.3287	80.838	83.5289	78.1472
100	106.983	120.2	93.7647	89.7725	92.6339	86.9111	80.6577	83.3404	77.9749
101	106.212	119.697	92.7275	89.239	92.0693	86.4088	80.4582	83.1317	77.7848
102	105.527	119.268	91.7862	88.6616	91.4582	85.8651	80.2032	82.8691	77.5372
103	104.752	118.716	90.7883	88.0528	90.8139	85.2917	79.9246	82.585	77.2643
104	104.011	118.172	89.8495	87.4125	90.1392	84.6857	79.5961	82.2545	76.9376
105	103.261	117.583	88.939	86.7627	89.4562	84.0693	79.2391	81.898	76.5802
106	102.373	116.809	87.9372	86.1224	88.7825	83.4624	78.8787	81.5433	76.2141
107	101.439	115.943	86.9352	85.4873	88.1191	82.8554	78.4841	81.1549	75.8132
108	100.364	114.899	85.829	84.8693	87.4746	82.2639	78.0636	80.7433	75.3839
109	99.162	113.672	84.652	84.298	86.881	81.7151	77.6172	80.3069	74.9274
110	97.8355	112.272	83.3993	83.7555	86.3206	81.1905	77.1553	79.8578	74.4528
111	96.4069	110.722	82.0918	83.2981	85.8501	80.746	76.6797	79.3941	73.9652
112	94.8441	108.982	80.7063	82.8558	85.3985	80.3131	76.1795	78.9026	73.4564
113	93.0824	107.007	79.1576	82.4712	85.0078	79.9345	75.6733	78.4039	72.9426
114	91.3446	105.017	77.6719	82.1309	84.664	79.5979	75.1511	77.8865	72.4158
115	89.5063	102.906	76.1067	81.8164	84.3479	79.285	74.606	77.3431	71.8688
116	87.5601	100.636	74.4841	81.573	84.1036	79.0424	74.005	76.7419	71.2682
117	85.5866	98.339	72.8342	81.3587	83.8901	78.8273	73.4074	76.1394	70.6753
118	83.6851	96.0733	71.2969	81.1693	83.7005	78.6381	72.7819	75.5049	70.059
119	81.6814	93.7042	69.6585	81.0049	83.5357	78.474	72.1422	74.8542	69.4302
120	79.7649	91.4089	68.1208	80.8304	83.3588	78.302	71.4528	74.1522	68.7535
121	77.9258	89.1922	66.6594	80.6914	83.2174	78.1654	70.7553	73.4403	68.0704
122	76.1691	87.047	65.2912	80.5247	83.0468	78.0027	70.0534	72.7242	67.3827
123	74.553	85.0666	64.0393	80.3616	82.8785	77.8447	69.3602	72.0155	66.7049
124	73.1483	83.3115	62.9852	80.1333	82.646	77.6206	68.6539	71.293	66.0148
125	71.8523	81.6713	62.0333	79.917	82.4246	77.4093	67.9544	70.5772	65.3316
126	70.774	80.2851	61.263	79.642	82.141	77.1431	67.2278	69.8364	64.6191
127	69.8307	79.0536	60.6079	79.3722	81.8642	76.8801	66.558	69.1511	63.965
128	69.1322	78.0742	60.1903	79.0746	81.5585	76.5907	65.8676	68.4466	63.2887
129	68.6012	77.2985	59.9039	78.7251	81.2005	76.2497	65.2388	67.8044	62.6733
130	68.2224	76.7131	59.7317	78.3632	80.8312	75.8952	64.6287	67.179	62.0784
131	68.0459	76.3417	59.7501	77.9975	80.4574	75.5377	64.043	66.579	61.507
132	68.047	76.1855	59.9085	77.5853	80.0359	75.1348	63.5127	66.0335	60.9919
133	68.1724	76.1726	60.1722	77.2079	79.6499	74.766	63.027	65.5334	60.5206
134	68.406	76.2872	60.5248	76.8181	79.2537	74.3826	62.5794	65.0695	60.0894
135	68.8308	76.6312	61.0303	76.4301	78.8582	74.002	62.1951	64.6693	59.7208
136	69.3213	77.0611	61.5815	76.0375	78.4599	73.6151	61.8748	64.3326	59.417
137	69.8714	77.5645	62.1783	75.6806	78.0983	73.2629	61.6091	64.0504	59.1678
138	70.436	78.1097	62.7624	75.3569	77.7713	72.9425	61.3781	63.8012	58.9549
139	71.0892	78.7541	63.4244	75.0518	77.4638	72.6399	61.2005	63.6064	58.7946
140	71.7324	79.4106	64.0543	74.7657	77.1748	72.3566	61.0881	63.4797	58.6966
141	72.4043	80.1031	64.7056	74.4811	76.888	72.0743	61.0403	63.416	58.6645
142	72.9695	80.7056	65.2334	74.2442	76.6524	71.8361	61.0288	63.3889	58.6687
143	73.4862	81.2528	65.7196	74.024	76.4339	71.6141	61.0459	63.3952	58.6967
144	73.9807	81.7875	66.174	73.8181	76.2322	71.404	61.1143	63.4559	58.7727
145	74.3668	82.1992	66.5345	73.6357	76.0529	71.2185	61.1864	63.5235	58.8493
146	74.6944	82.5499	66.8388	73.4772	75.8997	71.0547	61.2897	63.6257	58.9536
147	74.9148	82.7814	67.0483	73.3126	75.7429	70.8822	61.4024	63.7435	59.0614
148	75.0646	82.9207	67.2086	73.142	75.5824	70.7016	61.4769	63.8265	59.1272
149	75.1537	82.9907	67.3167	72.9923	75.4457	70.5389	61.5685	63.9325	59.2045
150	75.1018	82.8999	67.3037	72.8672	75.3335	70.4009	61.6438	64.0265	59.2612
151	74.949	82.6957	67.2024	72.7207	75.2017	70.2397	61.6844	64.0879	59.281
152	74.7254	82.4026	67.0482	72.5698	75.0683	70.0713	61.6927	64.1191	59.2663
153	74.3729	81.9726	66.7732	72.406	74.9215	69.8905	61.6788	64.1298	59.2277
154	73.9951	81.5014	66.4888	72.2231	74.7574	69.6889	61.6437	64.1191	59.1682
155	73.5561	80.9713	66.141	71.9979	74.5507	69.4451	61.5506	64.0512	59.0501
156	73.0446	80.3628	65.7265	71.7943	74.3672	69.2214	61.4216	63.945	58.8982
157	72.4564	79.6757	65.2371	71.5515	74.1429	68.96	61.2816	63.8243	58.739
158	71.8085	78.9209	64.696	71.275	73.8844	68.6656	61.093	63.6554	58.5307
159	71.1398	78.1488	64.1309	70.9647	73.5899	68.3395	60.8615	63.439	58.2841
160	70.4292	77.3402	63.5183	70.6717	73.3109	68.0325	60.6175	63.209	58.0259
161	69.696	76.5122	62.8799	70.3524	73.0052	67.6996	60.3778	62.9819	57.7737
162	68.9626	75.6955	62.2297	69.9981	72.6618	67.3344	60.136	62.7482	57.5238
163	68.2252	74.8816	61.5687	69.6254	72.2978	66.953	59.8725	62.4919	57.2532
164	67.4523	74.0449	60.8598	69.2606	71.9379	66.5833	59.6267	62.2533	57.0001
165	66.7345	73.266	60.2031	68.8797	71.5612	66.1983	59.3874	62.0193	56.7555
166	65.9445	72.4147	59.4744	68.4997	71.1839	65.8154	59.1662	61.8035	56.529
167	65.1879	71.6115	58.7643	68.1336	70.8203	65.4469	58.9783	61.6204	56.3362
168	64.5169	70.8977	58.1362	67.7746	70.4613	65.0879	58.7904	61.4368	56.1439
169	63.8436	70.1739	57.5133	67.4167	70.1021	64.7314	58.6305	61.2778	55.9832
170	63.1693	69.4508	56.8877	67.0725	69.7575	64.3875	58.5009	61.1485	55.8534
171	62.5765	68.7951	56.358	66.7801	69.4641	64.0961	58.4087	61.0568	55.7606
172	61.9468	68.1009	55.7927	66.5148	69.1998	63.8297	58.3255	60.9714	55.6796
173	61.2862	67.3538	55.2186	66.3098	68.9957	63.6238	58.2691	60.913	55.6251
174	60.6837	66.6552	54.7121	66.1292	68.8186	63.4399	58.2367	60.8777	55.5957
175	60.0752	65.9458	54.2046	65.9877	68.6796	63.2958	58.2695	60.906	55.6331
176	59.4677	65.2226	53.7128	65.8942	68.5917	63.1966	58.2801	60.9099	55.6503
177	58.7999	64.4297	53.17	65.8697	68.574	63.1654	58.3257	60.952	55.6994
178	58.1918	63.6982	52.6854	65.8721	68.5861	63.1581	58.3733	60.9918	55.7547
179	57.6055	62.9882	52.2228	65.936	68.6597	63.2122	58.4334	61.0443	55.8224
180	56.9874	62.2517	51.7231	66.0417	68.7774	63.3061	58.4884	61.0925	55.8844
181	56.352	61.5026	51.2014	66.1908	68.9414	63.4402	58.5349	61.1349	55.935
182	55.7529	60.8081	50.6977	66.3915	69.1557	63.6272	58.5854	61.1785	55.9923
183	55.0773	60.0476	50.107	66.6342	69.4134	63.855	58.6292	61.2189	56.0395
184	54.4363	59.3347	49.5379	66.9018	69.6979	64.1056	58.6643	61.2473	56.0812
185	53.8014	58.6423	48.9606	67.2087	70.024	64.3934	58.699	61.2783	56.1197
186	53.1762	57.9828	48.3696	67.5215	70.3556	64.6873	58.725	61.3011	56.1489
187	52.5238	57.3107	47.7369	67.863	70.7181	65.0079	58.7555	61.3268	56.1842
188	51.9041	56.6857	47.1225	68.2373	71.1171	65.3575	58.7557	61.3216	56.1897
189	51.2909	56.0847	46.4971	68.6022	71.5092	65.6953	58.7751	61.3384	56.2118
190	50.7369	55.5536	45.9203	68.9745	71.9109	66.038	58.7957	61.3553	56.2361
191	50.2505	55.1006	45.4004	69.357	72.3263	66.3877	58.8143	61.3712	56.2575
192	49.7726	54.6567	44.8885	69.7103	72.7161	66.7044	58.8631	61.416	56.3103
193	49.3996	54.3356	44.4635	70.0703	73.1171	67.0236	58.9003	61.4508	56.3498
194	49.0095	53.9895	44.0296	70.4177	73.5088	67.3266	58.9571	61.5055	56.4088
195	48.7084	53.7304	43.6865	70.7669	73.9076	67.6262	59.0467	61.5938	56.4995
196	48.5149	53.5757	43.4541	71.1189	74.3138	67.924	59.1404	61.6896	56.5912
197	48.4067	53.5114	43.302	71.4334	74.6874	68.1794	59.2444	61.7955	56.6932
198	48.3229	53.4628	43.1831	71.7576	75.0749	68.4402	59.3605	61.9157	56.8054
199	48.2852	53.4633	43.1071	72.0559	75.4414	68.6705	59.4984	62.0575	56.9392
200	48.3204	53.5379	43.103	72.3622	75.8183	68.9062	59.6501	62.2147	57.0856
