# Supplementary material for: Instantaneous movement-unrelated midbrain activity modifies ongoing eye movements
Source: eLife. 2021 May 6;10:e64150. doi: 10.7554/eLife.64150 (PMC8143798; doi:10.7554/eLife.64150)
Supplement: Figure 10—source data 1. [file elife-64150-fig10-data1.xlsx]

## Sheet: A
Polar distance (deg)	Polar angle	Firing rate (spikes/s)
4.10122	3.11721	49
4.08044	2.84309	35
3.77359	2.58299	0
3.47851	1.24905	42
3.19061	1.00887	10
3.28024	0.655696	9
3.10161	0.362544	9
3.10644	0.0644268	0
3.2573	5.97114	18
3.32415	5.51906	0
3.32415	5.51906	0
3.40588	4.65363	9
3.4176	4.35362	9
3.30151	4.09918	9
3.41321	3.69709	9
3.61386	3.39328	0
3.70135	3.11457	7
3.70135	3.11457	0
3.05287	2.58994	9
3.05287	2.58994	0
2.86531	2.08128	0
2.86531	2.08128	0
2.80713	1.6421	27
2.64764	1.38081	29
2.32594	1.12638	11
2.34307	0.694738	9
2.34307	0.694738	0
2.30217	0.0434509	0
2.46982	5.72888	2
2.46982	5.72888	24
2.40832	4.79553	0
2.47386	4.46741	0
2.47386	4.46741	7
2.78029	3.79948	4
2.87924	3.4963	16
3.2	3.14159	0
3.2	3.14159	0
2.81603	2.85354	9
2.46982	2.58729	35
2.20227	2.25972	0
1.99249	1.87668	1
1.67631	1.26791	25
1.55563	0.785398	8
1.33417	0.226799	0
799.7	4.71139	0
1.7	5.79323	9
1.61245	5.23154	0
1.70294	4.01013	0
1.92354	3.62849	9
2.43311	3.30674	0
2.43311	3.30674	0
2.1587	2.90785	0
1.83576	2.6292	0
1.56205	2.26553	9
1.36015	1.8693	0
1.00499	1.47113	19
1.00499	1.47113	0
0.7	0	0
0.7	0	9
0.824621	4.46741	0
0.824621	4.46741	9
1.06301	3.86042	0
1.45602	3.41989	6
1.80278	3.08609	0
1.38924	2.61352	0
1.38924	2.61352	10
0.608276	1.73595	18
0.8	0	10
0.8	0	0
0.72111	2.55359	9
0.72111	2.55359	0
0.806226	3.26595	0
0.5	3.78509	1
0.412311	2.89661	0
0.412311	1.32582	0
0.412311	1.32582	9
0.316228	5.96143	0
0.509902	4.51499	0
0.5	2.49809	2
0.72111	2.1588	11
1.56525	4.24874	0
1.9105	4.81727	9
1.84391	5.42102	0
1.5	2.2143	0
1.07703	2.76109	9
1.07703	2.76109	2
1.52643	3.69325	9
1	5.63968	10
1.26491	3.46334	0
1.41421	4.85429	10
0.943398	0.558599	0
1.17047	1.22203	9
1.5	1.5708	17
1.5	1.5708	9
0.412311	4.95737	10
0.806226	4.83674	2
0.806226	4.83674	0
799.7	4.71214	0
1.61245	0.519146	9
1.8868	1.0122	0
1.8868	1.0122	0
4.13038	4.83374	0
4.13038	4.83374	11
4.3909	4.18759	21
4.53431	3.86457	39
4.53431	3.86457	2
4.66905	3.31378	1
4.73814	3.01462	71
4.84665	2.76109	2
4.77074	2.56522	45
4.59674	2.37158	72
4.63249	2.14084	64
4.52217	1.88555	35
4.42832	1.68395	50
4.42832	1.68395	43
4.06079	0.907593	39
3.98246	0.497343	17
3.84708	0.156602	3
3.84708	0.156602	7
4.13401	5.72202	0
4.13401	5.72202	12
4.74342	5.03414	39
5.24786	5.25281	0
5.09117	5.49779	0
4.66154	5.88674	0
4.66154	5.88674	0
4.50111	6.26097	0
4.993	0.571337	76
4.993	0.571337	1
5.51725	0.759763	0
5.68507	0.68573	39
5.56058	0.912908	95
4.70744	1.35674	146
5.52178	2.18894	63
5.52178	2.18894	0
5.52178	2.18894	0
5.52178	2.18894	36
4.10488	3.19033	38
5.65685	2.35619	0
5.90762	2.5489	0
6.07289	2.84067	0
6.2	3.14159	8
6.23939	3.51912	9
5.87963	3.86682	9
5.44059	4.08359	0
5.57853	4.45871	26
5.88558	4.88312	0
6.6242	5.21655	0
6.00333	5.75991	0
5.70701	6.08923	39
5.72189	0.0874953	7
5.91354	0.327098	12
6.82495	0.681606	17
5.85918	1.09188	121
799.717	4.71889	26
5.38516	1.83379	112
5.41295	2.00966	41
6.28013	0.920926	22
6.456	1.28824	26
6.89638	1.05525	0
7.37564	0.86217	29
7.1	1.5708	14
7.0214	1.38457	12
7.44648	1.1853	44
8.34865	0.819283	7
8.00812	0.2783	7
8.12219	0.073939	0
8.59069	6.07209	0
8.59826	5.70486	0
8.56037	5.36524	13
7.84474	4.90478	0
7.64853	4.51499	0
7.6844	4.10273	7
8.12712	3.74325	0
8.6122	3.36404	2
8.50529	3.10631	0
8.50529	3.10631	0
799.716	4.71877	7
6.7082	1.75065	29
5.92115	1.65534	97
9.71442	0.357566	8
8.8	1.5708	17
8.35225	1.27934	31
10.4738	0.74488	18
11.114	0.528074	0
11.2641	0.106736	7
11.2641	0.106736	6
12.1202	6.09226	0
12.3891	5.8051	2
12.3891	5.8051	0
10.4389	5.11602	2
9.70464	4.74331	0
10.1518	4.25315	14
12.0441	3.65353	0
12.0441	3.65353	3
12.1824	3.31484	7
12.1824	3.31484	0
12.2577	2.9362	0
10.3078	2.25311	5
8.98443	1.86439	5
9.5352	1.4022	7
10.5309	1.17089	15
11.1212	0.912908	7
10.7378	1.01121	17
9.13893	1.1659	62
9.62601	0.829487	13
8.05047	1.45877	25
10.3121	1.52229	15
10.5759	1.34187	4
8.18596	1.129	20
11.6469	1.04952	7
12.8725	0.763424	2
14.0872	0.463648	15
16.0328	0.603572	6
13.7295	0.183111	0
14.2636	5.97695	8
15.4768	5.68622	0
10.7168	5.58367	0
13.3015	6.26815	1
12.4844	4.00637	7
16.3003	3.77896	11
12.9402	3.77891	0
9.95389	3.53329	4
13.7899	3.48169	0
14.9003	3.63826	8
11.1041	3.11457	7
10.2883	2.77372	0
13.8235	2.79468	4
13.8235	2.79468	7
11.4022	2.41204	15
12.7405	2.31178	7
10.9128	2.04674	7
13.1548	2.58944	3
10.1607	1.74889	6

## Sheet: B
Time (ms)	Mean value (spikes/s)	Upper s.e.m. value (spikes/s)	Lower s.e.m. (spikes/s)
-50	1.55774	2.86637	0.249124
-49	1.57103	2.85522	0.286841
-48	1.57527	2.8307	0.319846
-47	1.59171	2.81473	0.368694
-46	1.60842	2.79702	0.419811
-45	1.62575	2.77951	0.471995
-44	1.64398	2.76417	0.523793
-43	1.68801	2.77698	0.599041
-42	1.71636	2.77924	0.653478
-41	1.74769	2.79049	0.704888
-40	1.78207	2.81173	0.752406
-39	1.81943	2.84323	0.795619
-38	1.85958	2.88454	0.834627
-37	1.90224	2.93447	0.870002
-36	1.94699	2.99132	0.902656
-35	1.99335	3.05304	0.933665
-34	2.04079	3.1175	0.964078
-33	2.1135	3.20657	1.02044
-32	2.18186	3.29049	1.07324
-31	2.24341	3.36607	1.12075
-30	2.2982	3.43131	1.16509
-29	2.36726	3.51031	1.2242
-28	2.43853	3.58934	1.28773
-27	2.5124	3.66953	1.35527
-26	2.58923	3.75224	1.42621
-25	2.6693	3.83887	1.49973
-24	2.75284	3.93074	1.57494
-23	2.83989	4.02887	1.65091
-22	2.93031	4.13386	1.72676
-21	3.03613	4.25754	1.81472
-20	3.14838	4.39843	1.89833
-19	3.25483	4.53311	1.97655
-18	3.36391	4.67406	2.05376
-17	3.49013	4.83432	2.14594
-16	3.61167	4.99232	2.23101
-15	3.73367	5.15203	2.31531
-14	3.8675	5.32334	2.41166
-13	3.99133	5.48473	2.49792
-12	4.11344	5.64323	2.58364
-11	4.24534	5.80899	2.68169
-10	4.36552	5.9609	2.77014
-9	4.48273	6.10658	2.85889
-8	4.59666	6.2451	2.94821
-7	4.71954	6.38782	3.05125
-6	4.83064	6.51454	3.14674
-5	4.93948	6.63443	3.24453
-4	5.04641	6.7482	3.34461
-3	5.14253	6.84831	3.43675
-2	5.26139	6.9686	3.55419
-1	5.38252	7.08974	3.67529
0	5.49457	7.20376	3.78538
1	5.63162	7.34468	3.91856
2	5.7519	7.47509	4.02872
3	5.8984	7.63734	4.15947
4	6.0446	7.81112	4.27808
5	6.18787	7.98909	4.38665
6	6.34643	8.19116	4.50171
7	6.52396	8.4258	4.62213
8	6.70035	8.67168	4.72902
9	6.89822	8.95126	4.84519
10	7.08576	9.22704	4.94448
11	7.28234	9.52292	5.04176
12	7.48906	9.84077	5.13735
13	7.70715	10.1828	5.23148
14	7.96269	10.5865	5.33893
15	8.26509	11.0467	5.48348
16	8.54526	11.4988	5.59174
17	8.87546	12.019	5.73192
18	9.30812	12.6713	5.94493
19	9.77088	13.3685	6.17326
20	10.2888	14.1327	6.44493
21	10.8066	14.9084	6.70488
22	11.4101	15.7783	7.04199
23	12.0634	16.7047	7.42207
24	12.8033	17.7195	7.88707
25	13.5909	18.7813	8.40047
26	14.4778	19.9351	9.02052
27	15.4402	21.158	9.72229
28	16.484	22.4452	10.5228
29	17.6836	23.8691	11.4981
30	18.9667	25.3586	12.5748
31	20.2968	26.8699	13.7237
32	21.7723	28.4997	15.0449
33	23.3371	30.1943	16.4799
34	25.0132	31.9807	18.0457
35	26.8158	33.8727	19.7588
36	28.7132	35.8307	21.5958
37	30.7483	37.9094	23.5872
38	32.8555	40.0461	25.6649
39	35.0937	42.3025	27.8848
40	37.4099	44.6337	30.186
41	39.8332	47.0857	32.5807
42	42.2897	49.5749	35.0045
43	44.8101	52.1416	37.4786
44	47.383	54.7872	39.9787
45	49.946	57.4437	42.4482
46	52.4911	60.1079	44.8743
47	54.9988	62.7622	47.2354
48	57.4081	65.3367	49.4794
49	59.7166	67.8346	51.5987
50	61.879	70.1984	53.5596
51	63.8618	72.3875	55.3362
52	65.6231	74.3489	56.8972
53	67.1646	76.0844	58.2449
54	68.4242	77.5156	59.3327
55	69.385	78.6201	60.1499
56	70.0249	79.3692	60.6806
57	70.3169	79.729	60.9048
58	70.26	79.6986	60.8213
59	69.8557	79.273	60.4385
60	69.085	78.4299	59.74
61	67.9741	77.2032	58.7449
62	66.501	75.5673	57.4347
63	64.7071	73.5692	55.8451
64	62.6334	71.2513	54.0155
65	60.2751	68.6125	51.9376
66	57.6806	65.7073	49.6539
67	54.8867	62.578	47.1954
68	51.9205	59.255	44.586
69	48.8533	55.8185	41.888
70	45.7029	52.2884	39.1175
71	42.5114	48.711	36.3118
72	39.319	45.1311	33.507
73	36.1451	41.5679	30.7223
74	33.029	38.0727	27.9852
75	30.051	34.7228	25.3793
76	27.2003	31.5131	22.8876
77	24.443	28.405	20.481
78	21.8841	25.5191	18.2491
79	19.5087	22.8302	16.1871
80	17.3685	20.4043	14.3327
81	15.3791	18.1483	12.6099
82	13.5856	16.1131	11.0581
83	11.9531	14.2629	9.64332
84	10.5165	12.634	8.3989
85	9.20471	11.1448	7.2646
86	8.07196	9.86874	6.27518
87	7.08943	8.76637	5.4125
88	6.1763	7.74087	4.61172
89	5.4077	6.88895	3.92645
90	4.78982	6.20135	3.37829
91	4.21322	5.5646	2.86184
92	3.73288	5.02998	2.43578
93	3.31366	4.5588	2.06851
94	2.937	4.133	1.741
95	2.62484	3.77254	1.47714
96	2.32775	3.42273	1.23276
97	2.09151	3.13449	1.04852
98	1.85717	2.83573	0.878599
99	1.67309	2.59377	0.752415
100	1.48258	2.34561	0.619555
101	1.32668	2.12879	0.524575
102	1.18962	1.92893	0.450304
103	1.0412	1.7176	0.364805
104	0.914569	1.52796	0.301175
105	0.806607	1.35791	0.255302
106	0.69645	1.18786	0.205042
107	0.605551	1.03953	0.171575
108	0.522015	0.901855	0.142176
109	0.446124	0.775578	0.11667
110	0.377951	0.661094	0.0948083
111	0.329793	0.570863	0.0887228
112	0.271441	0.475094	0.067788
113	0.232845	0.403666	0.0620236
114	0.201515	0.344344	0.058686
115	0.177296	0.29743	0.0571627
116	0.159998	0.263607	0.0563887
117	0.149411	0.243951	0.0548706
118	0.145321	0.239357	0.0512851
119	0.138288	0.240226	0.03635
120	0.148998	0.266518	0.0314794
121	0.177399	0.316645	0.0381518
122	0.20268	0.368554	0.0368063
123	0.246537	0.443592	0.0494829
124	0.288275	0.520699	0.0558505
125	0.340457	0.612285	0.0686289
126	0.403376	0.718382	0.0883702
127	0.47426	0.835907	0.112614
128	0.553413	0.964812	0.142014
129	0.641023	1.10484	0.177211
130	0.737148	1.2555	0.218794
131	0.854092	1.42828	0.279907
132	0.970881	1.60202	0.339737
133	1.09651	1.78495	0.40806
134	1.23056	1.97613	0.484989
135	1.37245	2.17455	0.570355
136	1.52138	2.3791	0.663664
137	1.67635	2.58864	0.764072
138	1.83615	2.80192	0.870379
139	1.99932	3.0176	0.981048
140	2.1642	3.23415	1.09426
141	2.3289	3.44985	1.20796
142	2.49134	3.66268	1.31999
143	2.64923	3.8703	1.42815
144	2.80016	4.07004	1.53029
145	2.94164	4.25888	1.6244
146	3.07112	4.43356	1.70868
147	3.1861	4.59065	1.78156
148	3.2842	4.7267	1.84169
149	3.36321	4.8384	1.88803
150	3.42124	4.92273	1.91975
151	3.45673	4.97714	1.93632
152	3.46855	4.99965	1.93746
153	3.46847	5.00087	1.93608
154	3.43567	4.96052	1.91083
155	3.38002	4.88794	1.8721
156	3.30273	4.78449	1.82098
157	3.20557	4.65231	1.75882
158	3.09078	4.49426	1.6873
159	2.96104	4.31382	1.60827
160	2.81936	4.11496	1.52377
161	2.66898	3.90204	1.43592
162	2.51324	3.67968	1.3468
163	2.35549	3.45264	1.25835
164	2.21136	3.2376	1.18511
165	2.06312	3.01947	1.10677
166	1.92288	2.81193	1.03383
167	1.79315	2.61969	0.966604
168	1.67596	2.44718	0.904743
169	1.58528	2.31035	0.860215
170	1.49221	2.18375	0.800676
171	1.4276	2.09865	0.756553
172	1.37946	2.04407	0.714844
173	1.34771	2.01917	0.676243
174	1.34425	2.03353	0.654977
175	1.35991	2.07567	0.644146
176	1.3822	2.1307	0.633709
177	1.41937	2.20396	0.634785
178	1.47028	2.29221	0.648343
179	1.54609	2.40468	0.687501
180	1.6156	2.51011	0.721087
181	1.70785	2.63606	0.779635
182	1.80031	2.76064	0.839967
183	1.92537	2.91541	0.935318
184	2.05233	3.07299	1.03167
185	2.20241	3.25208	1.15274
186	2.36383	3.4435	1.28416
187	2.52493	3.63676	1.41309
188	2.70726	3.85344	1.56108
189	2.88994	4.07423	1.70565
190	3.08524	4.31217	1.85831
191	3.29305	4.5662	2.0199
192	3.52247	4.85079	2.19415
193	3.75241	5.13784	2.36699
194	4.00409	5.45321	2.55497
195	4.25608	5.77375	2.7384
196	4.51684	6.10911	2.92458
197	4.79772	6.47382	3.12162
198	5.07661	6.84227	3.31096
199	5.37368	7.23626	3.51109
200	5.6664	7.6351	3.69769

## Sheet: C
Time (ms)	Mean value (red)	Upper s.e.m. value (red)	Lower s.e.m. (red)	Mean value (blue)	Upper s.e.m. value (blue)	Lower s.e.m. (blue)
-50	1.55774	2.86637	0.249124	4.99239	5.63708	4.34769
-49	1.57103	2.85522	0.286841	4.94334	5.58161	4.30508
-48	1.57527	2.8307	0.319846	4.89784	5.53023	4.26546
-47	1.59171	2.81473	0.368694	4.85502	5.48249	4.22756
-46	1.60842	2.79702	0.419811	4.81346	5.43686	4.19007
-45	1.62575	2.77951	0.471995	4.78024	5.40065	4.15983
-44	1.64398	2.76417	0.523793	4.74864	5.36705	4.13023
-43	1.68801	2.77698	0.599041	4.72641	5.34478	4.10803
-42	1.71636	2.77924	0.653478	4.70331	5.32225	4.08437
-41	1.74769	2.79049	0.704888	4.68659	5.30767	4.06551
-40	1.78207	2.81173	0.752406	4.67485	5.29842	4.05127
-39	1.81943	2.84323	0.795619	4.66735	5.29512	4.03958
-38	1.85958	2.88454	0.834627	4.66476	5.29802	4.03151
-37	1.90224	2.93447	0.870002	4.66856	5.30866	4.02845
-36	1.94699	2.99132	0.902656	4.67053	5.31822	4.02284
-35	1.99335	3.05304	0.933665	4.67683	5.33255	4.02112
-34	2.04079	3.1175	0.964078	4.68872	5.35428	4.02315
-33	2.1135	3.20657	1.02044	4.70231	5.37841	4.02621
-32	2.18186	3.29049	1.07324	4.71745	5.40464	4.03026
-31	2.24341	3.36607	1.12075	4.73803	5.43765	4.03842
-30	2.2982	3.43131	1.16509	4.76418	5.47703	4.05133
-29	2.36726	3.51031	1.2242	4.79121	5.51818	4.06424
-28	2.43853	3.58934	1.28773	4.82375	5.56563	4.08186
-27	2.5124	3.66953	1.35527	4.85356	5.61148	4.09564
-26	2.58923	3.75224	1.42621	4.89054	5.6653	4.11579
-25	2.6693	3.83887	1.49973	4.92409	5.71583	4.13235
-24	2.75284	3.93074	1.57494	4.95927	5.76888	4.14966
-23	2.83989	4.02887	1.65091	5.00428	5.83214	4.17642
-22	2.93031	4.13386	1.72676	5.04053	5.88668	4.19438
-21	3.03613	4.25754	1.81472	5.07891	5.94334	4.21449
-20	3.14838	4.39843	1.89833	5.11405	5.99612	4.23198
-19	3.25483	4.53311	1.97655	5.14504	6.04375	4.24632
-18	3.36391	4.67406	2.05376	5.17301	6.08715	4.25886
-17	3.49013	4.83432	2.14594	5.19895	6.12695	4.27096
-16	3.61167	4.99232	2.23101	5.22104	6.16092	4.28115
-15	3.73367	5.15203	2.31531	5.23103	6.18057	4.28148
-14	3.8675	5.32334	2.41166	5.23981	6.19659	4.28302
-13	3.99133	5.48473	2.49792	5.23431	6.19527	4.27334
-12	4.11344	5.64323	2.58364	5.22744	6.18967	4.26521
-11	4.24534	5.80899	2.68169	5.21486	6.17508	4.25465
-10	4.36552	5.9609	2.77014	5.19426	6.14933	4.23919
-9	4.48273	6.10658	2.85889	5.17135	6.11845	4.22425
-8	4.59666	6.2451	2.94821	5.14653	6.0826	4.21047
-7	4.71954	6.38782	3.05125	5.12214	6.04463	4.19965
-6	4.83064	6.51454	3.14674	5.09755	6.00427	4.19083
-5	4.93948	6.63443	3.24453	5.07383	5.96307	4.18458
-4	5.04641	6.7482	3.34461	5.05083	5.92109	4.18056
-3	5.14253	6.84831	3.43675	5.02773	5.87843	4.17704
-2	5.26139	6.9686	3.55419	5.00915	5.84023	4.17807
-1	5.38252	7.08974	3.67529	4.99829	5.81028	4.1863
0	5.49457	7.20376	3.78538	4.98737	5.78126	4.19349
1	5.63162	7.34468	3.91856	4.98343	5.76072	4.20613
2	5.7519	7.47509	4.02872	4.98388	5.74653	4.22123
3	5.8984	7.63734	4.15947	4.98349	5.73332	4.23366
4	6.0446	7.81112	4.27808	4.98357	5.72239	4.24476
5	6.18787	7.98909	4.38665	4.98253	5.71242	4.25264
6	6.34643	8.19116	4.50171	4.97417	5.69666	4.25168
7	6.52396	8.4258	4.62213	4.96187	5.67815	4.24559
8	6.70035	8.67168	4.72902	4.94394	5.65498	4.2329
9	6.89822	8.95126	4.84519	4.91445	5.62019	4.2087
10	7.08576	9.22704	4.94448	4.87873	5.57949	4.17798
11	7.28234	9.52292	5.04176	4.82837	5.52367	4.13307
12	7.48906	9.84077	5.13735	4.76839	5.45764	4.07915
13	7.70715	10.1828	5.23148	4.70648	5.38935	4.0236
14	7.96269	10.5865	5.33893	4.63629	5.31201	3.96057
15	8.26509	11.0467	5.48348	4.57701	5.24436	3.90966
16	8.54526	11.4988	5.59174	4.51158	5.17008	3.85308
17	8.87546	12.019	5.73192	4.46174	5.11099	3.81248
18	9.30812	12.6713	5.94493	4.41982	5.05937	3.78027
19	9.77088	13.3685	6.17326	4.41322	5.04268	3.78375
20	10.2888	14.1327	6.44493	4.42384	5.04345	3.80423
21	10.8066	14.9084	6.70488	4.47025	5.08062	3.85988
22	11.4101	15.7783	7.04199	4.57519	5.17705	3.97334
23	12.0634	16.7047	7.42207	4.72739	5.32132	4.13346
24	12.8033	17.7195	7.88707	4.95261	5.53981	4.36541
25	13.5909	18.7813	8.40047	5.26528	5.84747	4.68309
26	14.4778	19.9351	9.02052	5.68465	6.26433	5.10498
27	15.4402	21.158	9.72229	6.21529	6.79578	5.6348
28	16.484	22.4452	10.5228	6.86019	7.44562	6.27477
29	17.6836	23.8691	11.4981	7.65029	8.24613	7.05445
30	18.9667	25.3586	12.5748	8.59198	9.20467	7.97928
31	20.2968	26.8699	13.7237	9.69237	10.3296	9.05516
32	21.7723	28.4997	15.0449	10.9722	11.6421	10.3023
33	23.3371	30.1943	16.4799	12.4308	13.1432	11.7185
34	25.0132	31.9807	18.0457	14.096	14.8599	13.3321
35	26.8158	33.8727	19.7588	15.9479	16.7729	15.1229
36	28.7132	35.8307	21.5958	17.9876	18.882	17.0932
37	30.7483	37.9094	23.5872	20.2366	21.2075	19.2657
38	32.8555	40.0461	25.6649	22.6634	23.7173	21.6094
39	35.0937	42.3025	27.8848	25.2722	26.4143	24.1301
40	37.4099	44.6337	30.186	28.0312	29.2649	26.7975
41	39.8332	47.0857	32.5807	30.9338	32.2616	29.606
42	42.2897	49.5749	35.0045	33.9427	35.365	32.5205
43	44.8101	52.1416	37.4786	37.0216	38.5378	35.5054
44	47.383	54.7872	39.9787	40.1435	41.7514	38.5355
45	49.946	57.4437	42.4482	43.252	44.9486	41.5555
46	52.4911	60.1079	44.8743	46.3192	48.1001	44.5384
47	54.9988	62.7622	47.2354	49.2862	51.1459	47.4265
48	57.4081	65.3367	49.4794	52.1052	54.0375	50.1729
49	59.7166	67.8346	51.5987	54.7348	56.7329	52.7366
50	61.879	70.1984	53.5596	57.1297	59.1863	55.0731
51	63.8618	72.3875	55.3362	59.2424	61.3494	57.1354
52	65.6231	74.3489	56.8972	61.0353	63.1845	58.8861
53	67.1646	76.0844	58.2449	62.4772	64.6604	60.2939
54	68.4242	77.5156	59.3327	63.5408	65.7492	61.3324
55	69.385	78.6201	60.1499	64.2092	66.434	61.9845
56	70.0249	79.3692	60.6806	64.466	66.6983	62.2336
57	70.3169	79.729	60.9048	64.311	66.5421	62.0798
58	70.26	79.6986	60.8213	63.7452	65.9665	61.524
59	69.8557	79.273	60.4385	62.7875	64.9905	60.5845
60	69.085	78.4299	59.74	61.4513	63.6276	59.2749
61	67.9741	77.2032	58.7449	59.7671	61.909	57.6252
62	66.501	75.5673	57.4347	57.7728	59.8729	55.6728
63	64.7071	73.5692	55.8451	55.5014	57.5526	53.4501
64	62.6334	71.2513	54.0155	52.9962	54.9923	51.0002
65	60.2751	68.6125	51.9376	50.3036	52.2385	48.3686
66	57.6806	65.7073	49.6539	47.471	49.3403	45.6017
67	54.8867	62.578	47.1954	44.54	46.3397	42.7404
68	51.9205	59.255	44.586	41.5603	43.2869	39.8336
69	48.8533	55.8185	41.888	38.5701	40.2216	36.9185
70	45.7029	52.2884	39.1175	35.6137	37.1888	34.0386
71	42.5114	48.711	36.3118	32.7197	34.218	31.2214
72	39.319	45.1311	33.507	29.9213	31.3428	28.4998
73	36.1451	41.5679	30.7223	27.2421	28.5885	25.8957
74	33.029	38.0727	27.9852	24.7019	25.9748	23.429
75	30.051	34.7228	25.3793	22.326	23.5285	21.1235
76	27.2003	31.5131	22.8876	20.1224	21.2579	18.987
77	24.443	28.405	20.481	18.1043	19.1763	17.0324
78	21.8841	25.5191	18.2491	16.259	17.272	15.2461
79	19.5087	22.8302	16.1871	14.6147	15.5733	13.6561
80	17.3685	20.4043	14.3327	13.1519	14.0603	12.2435
81	15.3791	18.1483	12.6099	11.8496	12.7137	10.9855
82	13.5856	16.1131	11.0581	10.7305	11.5559	9.90514
83	11.9531	14.2629	9.64332	9.76362	10.5553	8.97192
84	10.5165	12.634	8.3989	8.93976	9.70361	8.1759
85	9.20471	11.1448	7.2646	8.25046	8.99241	7.50851
86	8.07196	9.86874	6.27518	7.69004	8.41496	6.96511
87	7.08943	8.76637	5.4125	7.25207	7.96607	6.53808
88	6.1763	7.74087	4.61172	6.91475	7.62289	6.20662
89	5.4077	6.88895	3.92645	6.67016	7.37868	5.96165
90	4.78982	6.20135	3.37829	6.50878	7.22161	5.79595
91	4.21322	5.5646	2.86184	6.41524	7.13569	5.69478
92	3.73288	5.02998	2.43578	6.38033	7.11247	5.64818
93	3.31366	4.5588	2.06851	6.38361	7.13037	5.63685
94	2.937	4.133	1.741	6.43379	7.19672	5.67085
95	2.62484	3.77254	1.47714	6.51318	7.29439	5.73197
96	2.32775	3.42273	1.23276	6.60047	7.40068	5.80025
97	2.09151	3.13449	1.04852	6.70729	7.52619	5.88838
98	1.85717	2.83573	0.878599	6.80735	7.64522	5.96949
99	1.67309	2.59377	0.752415	6.90957	7.76503	6.05411
100	1.48258	2.34561	0.619555	6.98759	7.85853	6.11665
101	1.32668	2.12879	0.524575	7.05144	7.93554	6.16735
102	1.18962	1.92893	0.450304	7.0973	7.99186	6.20275
103	1.0412	1.7176	0.364805	7.11538	8.01726	6.2135
104	0.914569	1.52796	0.301175	7.10953	8.015	6.20405
105	0.806607	1.35791	0.255302	7.06995	7.97538	6.16452
106	0.69645	1.18786	0.205042	7.00246	7.90348	6.10144
107	0.605551	1.03953	0.171575	6.90677	7.79995	6.01359
108	0.522015	0.901855	0.142176	6.78034	7.66195	5.89872
109	0.446124	0.775578	0.11667	6.62295	7.48935	5.75655
110	0.377951	0.661094	0.0948083	6.44667	7.29449	5.59886
111	0.329793	0.570863	0.0887228	6.24733	7.07374	5.42093
112	0.271441	0.475094	0.067788	6.02846	6.83115	5.22576
113	0.232845	0.403666	0.0620236	5.79732	6.57432	5.02031
114	0.201515	0.344344	0.058686	5.55207	6.30263	4.80151
115	0.177296	0.29743	0.0571627	5.30403	6.02736	4.58069
116	0.159998	0.263607	0.0563887	5.05244	5.7483	4.35659
117	0.149411	0.243951	0.0548706	4.80478	5.47386	4.13571
118	0.145321	0.239357	0.0512851	4.56001	5.20358	3.91645
119	0.138288	0.240226	0.03635	4.32399	4.94402	3.70396
120	0.148998	0.266518	0.0314794	4.0969	4.69523	3.49856
121	0.177399	0.316645	0.0381518	3.88744	4.46669	3.30818
122	0.20268	0.368554	0.0368063	3.69286	4.25597	3.12976
123	0.246537	0.443592	0.0494829	3.51864	4.06824	2.96904
124	0.288275	0.520699	0.0558505	3.3601	3.89893	2.82128
125	0.340457	0.612285	0.0686289	3.22065	3.75153	2.68977
126	0.403376	0.718382	0.0883702	3.10177	3.627	2.57653
127	0.47426	0.835907	0.112614	3.00176	3.52357	2.47995
128	0.553413	0.964812	0.142014	2.92203	3.4423	2.40175
129	0.641023	1.10484	0.177211	2.86092	3.3809	2.34095
130	0.737148	1.2555	0.218794	2.81623	3.33731	2.29516
131	0.854092	1.42828	0.279907	2.79177	3.31416	2.26937
132	0.970881	1.60202	0.339737	2.77884	3.30382	2.25387
133	1.09651	1.78495	0.40806	2.7779	3.30602	2.24979
134	1.23056	1.97613	0.484989	2.79206	3.32343	2.26069
135	1.37245	2.17455	0.570355	2.81413	3.34883	2.27943
136	1.52138	2.3791	0.663664	2.84212	3.3799	2.30434
137	1.67635	2.58864	0.764072	2.87706	3.41765	2.33648
138	1.83615	2.80192	0.870379	2.91973	3.46281	2.37666
139	1.99932	3.0176	0.981048	2.96279	3.50771	2.41786
140	2.1642	3.23415	1.09426	3.01526	3.5618	2.46873
141	2.3289	3.44985	1.20796	3.06475	3.61271	2.5168
142	2.49134	3.66268	1.31999	3.11346	3.66208	2.56485
143	2.64923	3.8703	1.42815	3.16301	3.71145	2.61456
144	2.80016	4.07004	1.53029	3.21252	3.76071	2.66432
145	2.94164	4.25888	1.6244	3.25925	3.80697	2.71154
146	3.07112	4.43356	1.70868	3.30439	3.85115	2.75763
147	3.1861	4.59065	1.78156	3.34407	3.88938	2.79876
148	3.2842	4.7267	1.84169	3.38099	3.92454	2.83745
149	3.36321	4.8384	1.88803	3.41622	3.95836	2.87407
150	3.42124	4.92273	1.91975	3.44778	3.98797	2.90758
151	3.45673	4.97714	1.93632	3.47789	4.01665	2.93912
152	3.46855	4.99965	1.93746	3.50464	4.04212	2.96716
153	3.46847	5.00087	1.93608	3.53526	4.07171	2.99881
154	3.43567	4.96052	1.91083	3.56089	4.09666	3.02512
155	3.38002	4.88794	1.8721	3.58358	4.11915	3.04801
156	3.30273	4.78449	1.82098	3.60531	4.14102	3.0696
157	3.20557	4.65231	1.75882	3.62553	4.16187	3.08919
158	3.09078	4.49426	1.6873	3.64782	4.18579	3.10985
159	2.96104	4.31382	1.60827	3.66959	4.20964	3.12953
160	2.81936	4.11496	1.52377	3.68718	4.23004	3.14431
161	2.66898	3.90204	1.43592	3.70646	4.25235	3.16057
162	2.51324	3.67968	1.3468	3.72503	4.27445	3.1756
163	2.35549	3.45264	1.25835	3.74327	4.29615	3.1904
164	2.21136	3.2376	1.18511	3.76548	4.32262	3.20833
165	2.06312	3.01947	1.10677	3.78321	4.34424	3.22218
166	1.92288	2.81193	1.03383	3.80215	4.36661	3.23769
167	1.79315	2.61969	0.966604	3.8214	4.38894	3.25387
168	1.67596	2.44718	0.904743	3.84083	4.41111	3.27054
169	1.58528	2.31035	0.860215	3.85959	4.4321	3.28708
170	1.49221	2.18375	0.800676	3.8782	4.45245	3.30396
171	1.4276	2.09865	0.756553	3.89883	4.47427	3.32338
172	1.37946	2.04407	0.714844	3.92057	4.49663	3.34451
173	1.34771	2.01917	0.676243	3.94494	4.52169	3.3682
174	1.34425	2.03353	0.654977	3.96967	4.5468	3.39255
175	1.35991	2.07567	0.644146	3.9976	4.5755	3.41969
176	1.3822	2.1307	0.633709	4.02632	4.60498	3.44766
177	1.41937	2.20396	0.634785	4.05398	4.63331	3.47465
178	1.47028	2.29221	0.648343	4.08758	4.66833	3.50684
179	1.54609	2.40468	0.687501	4.12069	4.70312	3.53827
180	1.6156	2.51011	0.721087	4.15158	4.73598	3.56718
181	1.70785	2.63606	0.779635	4.18353	4.77023	3.59684
182	1.80031	2.76064	0.839967	4.21527	4.80437	3.62616
183	1.92537	2.91541	0.935318	4.24898	4.8409	3.65707
184	2.05233	3.07299	1.03167	4.27899	4.87354	3.68445
185	2.20241	3.25208	1.15274	4.30964	4.90695	3.71234
186	2.36383	3.4435	1.28416	4.33955	4.93917	3.73993
187	2.52493	3.63676	1.41309	4.36294	4.96472	3.76116
188	2.70726	3.85344	1.56108	4.38193	4.98546	3.77839
189	2.88994	4.07423	1.70565	4.40147	5.00625	3.79668
190	3.08524	4.31217	1.85831	4.41498	5.0201	3.80986
191	3.29305	4.5662	2.0199	4.43124	5.03626	3.82622
192	3.52247	4.85079	2.19415	4.44127	5.04577	3.83676
193	3.75241	5.13784	2.36699	4.44755	5.05097	3.84413
194	4.00409	5.45321	2.55497	4.45398	5.05609	3.85187
195	4.25608	5.77375	2.7384	4.45942	5.05972	3.85912
196	4.51684	6.10911	2.92458	4.46175	5.0606	3.86289
197	4.79772	6.47382	3.12162	4.46674	5.06446	3.86902
198	5.07661	6.84227	3.31096	4.47439	5.07164	3.87715
199	5.37368	7.23626	3.51109	4.48163	5.07907	3.88418
200	5.6664	7.6351	3.69769	4.4925	5.09126	3.89374

## Sheet: D
Polar distance (deg)	Polar angle	Firing rate (spikes/s)
1.48381	3.65599	215
0.0823796	0.521013	48
0.0619982	0.840309	42
0.0808985	4.4513	0
1.53999	5.57034	0
0.198026	0.71348	0
0.0891821	2.08089	0
0.487547	4.34044	78
0.119068	5.31519	0
0.0875094	1.82074	79
0.732281	3.38064	280
0.870453	3.76405	203
0.242151	5.95382	9
0.058854	1.76601	83
1.85837	4.06327	50
0.0364514	4.6133	42
0.437788	2.36507	225
0.174276	0.472038	10
0.644049	3.31418	262
0.0315525	6.06783	18
0.305882	4.0309	98
0.15871	5.94798	0
0.0701945	4.6708	0
0.506184	2.24383	195
0.154157	5.02916	0
0.0968263	2.06494	56
0.866214	4.53368	0
0.3187	5.09768	0
0.111083	1.92808	109
1.42536	3.92875	113
0.156282	5.97686	0
0.591451	4.51126	0
0.026295	4.66976	41
0.0019421	1.56231	53
1.29147	3.54156	279
0.0621155	4.94387	0
0.317049	0.718917	1
0.0283577	3.25433	77
0.206054	1.09584	9
0.175483	0.932622	0
0.183922	4.01397	166
1.15816	3.36423	261
0.0860544	5.1256	16
1.90814	2.23191	45
0.333612	2.34607	257
0.0520594	1.48436	14
0.655838	1.71939	0
0.12976	5.18183	0
0.329434	2.1743	122
0.350833	6.01337	0
0.33735	1.27178	19
0.2395	1.01972	9
0.0181164	4.517	167
0.0110455	1.54474	66
0.948112	3.90325	195
0.359269	5.79552	0
0.152129	3.02085	186
1.65355	3.716	152
0.239288	5.44241	0
0.207737	2.24396	158
0.162472	2.33657	210
0.391497	1.24289	0
1.79358	3.02955	285
1.31594	3.31271	266
0.166623	3.7512	140
0.169559	0.307389	0
0.432874	5.24166	0
0.144846	5.18006	0
0.871366	3.4214	233
0.0397063	5.09354	0
0.206479	1.12571	0
0.975371	3.96602	139
0.299359	0.0716302	0
0.0181658	4.73606	2
0.142435	3.43788	159
0.147523	6.1254	0
0.210087	5.14683	0
0.0350933	1.63327	13
0.0652861	4.51689	0
0.544656	2.98463	335
0.850258	2.04677	116
0.271223	2.62821	147
0.183685	4.50058	26
0.220052	0.986748	3
0.0851005	4.37184	56
0.824159	4.06967	107
0.128681	0.523609	0
1.62517	5.74891	0
0.117793	5.08989	0
0.297401	0.109488	0
0.0654254	5.02187	0
0.698103	5.60771	0
1.39651	3.5995	196
0.0140142	1.98119	0
0.13079	6.00101	0
0.707364	3.92208	159
0.204521	3.23953	226
0.0300983	1.07327	51
0.194348	3.58369	168
0.0263972	4.57012	27
0.0201831	4.67435	10
0.381722	3.53578	306
1.31348	3.87694	123
0.019816	1.62772	10
1.64998	4.12837	44
0.203236	4.33638	28
0.228802	5.46021	0
1.07086	4.46053	0
0.532485	5.07508	0
0.00968743	1.36185	0
0.0277462	4.70365	0
0.326651	2.43762	145
0.211178	5.21236	0
0.128528	6.20625	0
0.825415	4.00879	118
0.0877845	0.959397	0
0.771603	0.503813	0
0.172848	2.08943	0
1.36734	5.672	0
0.391634	2.61985	242
0.3077	0.753092	0
0.0265902	1.70698	160
0.682846	3.44795	285
0.629248	5.86237	0
0.566315	2.90241	298
0.275907	4.34489	29
0.185709	5.33194	0
1.82553	2.65892	11
1.49554	5.62661	0
1.04084	5.42072	0
0.133425	0.118384	0
1.3832	2.94859	300
0.0255068	4.4529	0
0.613016	2.14788	185
0.167385	5.39918	0
0.539779	2.96198	306
0.0916893	2.51874	0
0.106798	4.87245	0
0.0696738	1.6733	61
1.31933	3.0163	278
0.374201	4.62427	0
0.310303	0.0203858	0
0.749368	3.25441	294
0.306489	0.63948	4
1.74568	5.20727	5
0.245301	3.55471	245
0.0101971	1.41826	101
0.172739	1.50072	1
0.277714	4.27107	90
0.215512	0.563217	15
0.539866	4.47646	1
0.036311	4.62652	19
0.106316	0.988204	5
0.163137	3.1715	185
0.847649	3.1956	272
0.302885	5.8797	0
1.89902	4.08016	18
0.0110644	4.66295	0
0.0734847	1.34624	27
0.421271	4.30683	92
0.211033	1.11531	0
0.111336	4.38777	124
0.14388	3.80475	74
0.325093	1.95836	108
0.295519	4.83785	0
0.0133091	5.51773	0
0.424864	6.22318	0
0.0777898	4.76618	0
1.74789	3.54201	208
0.162028	4.35626	67
0.188478	3.78371	142
0.0620072	1.35107	0
0.530066	5.23197	0
0.0352995	1.75484	157
0.191528	5.37101	0
0.342682	6.11295	6
0.393283	4.50755	9
0.0539101	4.50315	10
0.845479	4.35645	42
0.291134	4.92979	0
0.891474	4.05622	149
0.00285739	4.72469	0
0.0379938	1.44014	0
0.38524	4.49005	20
0.0522626	1.36899	1
0.792193	5.92972	0
0.20687	0.749304	5
0.594521	1.99462	124
0.164823	5.86105	0
1.37102	3.93213	96
1.83041	2.34567	62
0.231643	3.49052	143
0.00640118	2.48032	27
0.434352	0.637279	0
0.525341	5.52716	2
0.238264	2.59271	265
1.25495	3.36143	236
0.130043	5.77583	0
0.336522	1.42646	0
1.75373	3.13411	277
0.131117	2.06003	194
0.274452	4.5668	18
0.191492	2.24614	183
1.78448	3.8999	29
0.0747541	4.23605	84
1.76744	2.67608	210
0.0648774	1.74686	4
1.16247	5.92942	2
0.432099	2.13826	100
0.15018	5.10423	0
0.00596024	1.58525	38
0.131762	1.64166	3
0.232386	2.14352	128
0.0469369	1.30022	0
1.10742	3.28682	305
0.0318754	4.82904	97
1.52676	5.74805	0
0.102535	1.82257	25
1.02017	3.39743	152
0.163703	5.31448	0
0.0976997	0.875109	1
0.711327	3.92092	146
0.407418	5.77174	0
0.449089	5.00582	0
0.226788	4.84782	0
0.155627	0.731782	18
0.494493	4.19883	63
0.100057	4.40892	17
0.127597	1.08678	1
0.353282	1.85179	54
0.862359	5.84882	0
0.867445	4.06133	101
0.353938	5.55483	0
0.187078	4.38981	42
0.191539	5.0126	0
0.226004	2.17827	82
1.25511	4.23734	20
0.36973	5.82953	0
0.124167	1.39457	16
0.170071	4.21658	35
0.319172	0.358366	0
0.165418	4.53159	22
0.0528448	4.88857	25
0.749619	0.715667	0
1.00117	4.32276	0
0.349351	5.33143	0
0.0395796	1.40864	1
1.2605	3.48252	251
0.257824	0.446909	0
0.121916	2.80866	147
0.125184	4.97758	0
0.164374	1.45354	0
0.558861	5.51743	0
0.108703	2.18638	50
0.159627	5.47031	0
1.22598	2.29891	200
0.0826287	4.87996	0
0.0135076	1.5414	26
0.828712	1.30519	0
0.122353	5.36212	0
0.0568628	1.40461	12
0.908347	1.00747	0
0.120359	3.86259	121
0.917408	0.19591	0
0.215301	5.17921	1
0.782244	5.72912	0
0.0901608	4.99304	0
0.243239	1.46522	9
0.368421	2.14551	168
0.00396793	4.68816	0
0.4337	4.22191	79
0.426071	4.58422	0
0.0753734	4.67485	0
0.0686321	4.53063	75
0.17	4.8806	0
0.0909253	6.0358	0
0.401979	4.99868	0
0.400538	1.17908	3
0.403087	4.18564	103
0.63422	4.20186	85
0.333954	5.90277	0
0.844984	4.99409	0
0.056431	5.14141	0
0.797608	3.81601	193
0.0679371	4.97723	0
0.177024	6.22203	8
0.908711	4.28206	1
0.793932	3.84872	175
0.0775693	0.169681	0
0.265013	3.72573	164
0.0682196	4.38071	0
0.75782	3.70479	224
0.0846345	5.29995	0
1.25475	3.1822	301
0.220936	0.732753	0
0.151289	4.08971	75
1.00269	3.05538	264
0.156101	0.633855	8
0.105528	0.315579	0
0.189459	1.19322	36
1.00006	3.77452	143
0.242456	0.130074	0
0.14307	0.62219	9
0.404964	2.36116	201
0.286748	1.88177	88
0.285022	5.85593	0
0.541868	3.11031	286
0.0853536	4.38131	38
1.22794	5.32361	0
0.195256	0.547998	0
0.142654	6.09576	0
0.210041	5.5725	0
0.0101196	4.65475	0
0.0704302	4.73999	0
0.252951	3.93723	130
0.392148	3.91775	205
0.279413	2.31996	182
0.0661856	1.33166	0
0.790464	3.16619	199
0.313417	6.07986	0
0.193918	2.11255	158
0.260874	4.51542	19
0.0339763	4.5886	19
0.0622974	5.26054	9
1.50874	4.10158	20
0.00419153	4.73244	0
0.588362	3.50374	23
0.244426	4.49673	31
1.27406	3.59881	174
0.0575029	4.9234	0
0.322926	4.52579	9
0.145684	0.371807	0
0.220436	2.0263	97
0.234657	0.251836	0
0.580404	4.09044	115
0.089659	4.48483	0
0.197949	3.42043	0
0.192484	4.56328	9
0.165332	4.89606	0
0.106096	1.8145	103
0.678553	3.53344	195
0.300227	5.64432	0
0.959409	4.58271	0
0.0879888	5.14133	0
0.115365	1.13836	0
0.136311	4.60119	0
0.106582	0.93617	10
0.355935	6.1064	0
0.153506	5.33896	0
0.357431	5.05112	0
0.196646	2.39159	152
0.052334	5.13644	0
0.0125567	4.70306	0
0.16709	0.87553	0
0.676859	3.1188	275
0.121606	0.0502708	0
0.546516	0.452478	0
0.482524	1.31259	35
1.15731	3.73032	162
0.277319	3.35606	205
0.0374554	1.63615	64
0.0100587	4.68561	0
0.4958	0.689819	0
0.275649	0.167793	0
0.378554	4.50694	0
0.430936	4.621	0
0.383622	5.21179	0
0.0361023	1.72946	58
1.03348	4.24328	49
0.104743	1.25978	2
0.502693	0.964946	0
0.0374518	2.05514	38
0.652452	5.36303	0
0.159279	4.35063	55
0.53581	1.25073	0
0.970248	4.37075	5
0.319962	5.24476	0
0.165612	2.0398	54
0.0665105	4.91268	0
0.745873	3.67643	255
0.0211683	6.15317	0
0.176194	5.11255	0
1.15462	3.9123	140
0.0220602	4.60692	61
0.112791	3.29092	108
0.37255	0.71537	0
0.118095	4.21832	78
1.14249	4.36645	0
1.57763	0.104781	0
0.095182	4.91773	0
0.868921	3.54354	202
0.13969	1.13555	0
1.6407	3.07546	257
0.117831	3.54861	76
0.0591405	1.4065	0
0.438703	1.71053	16
0.10508	5.09897	0
0.249186	5.13473	0
0.0384703	4.86217	0
0.110782	5.40079	0
0.199655	1.12556	0
1.78236	3.63135	181
0.0445585	5.07053	0
0.281869	0.956052	0
0.412349	3.57464	218
0.135165	4.39999	85
1.06714	4.99927	4
0.235932	3.94406	163
0.17273	6.00785	6
0.163191	2.28465	115
0.240511	5.18728	0
0.113795	5.61674	0
0.203808	1.99105	66
0.122811	4.4111	0
0.753157	4.14078	39
0.422275	6.07945	0
0.294761	5.2527	0
0.113131	4.95527	0
1.24355	4.06315	0
0.0110543	4.70108	0
0.148853	5.93501	0
0.249932	5.84017	0
0.00323039	1.62739	24
0.453714	4.38698	18
0.0903724	4.96988	0
0.105142	4.65171	0
0.62136	0.527703	0
0.0936943	5.30446	0
1.22044	3.62914	214
0.0896482	4.47513	85
0.0283184	1.61142	17
0.178818	6.2526	0
0.107379	5.13448	0
0.172272	2.31924	10
0.580211	4.75917	0
0.161999	4.88516	0
0.147409	2.10867	94
0.71104	4.38842	11
0.0934691	0.700779	0
0.719781	5.19284	0
0.0879187	2.25952	145
1.21347	4.3966	0
0.024656	4.69418	5
0.162482	4.74474	0
0.205359	6.24572	0
0.121222	5.81389	0
0.207447	5.91034	0
0.249719	0.575147	0
0.189827	4.55711	6
0.133132	2.88151	51
1.79195	2.70677	216
0.342092	0.177467	0
0.217091	3.12496	187
0.971969	3.72391	183
0.221442	6.12204	0
0.146748	4.56686	0
0.139518	5.76779	0
0.721458	5.36237	7
0.0435627	1.03251	0
0.948529	4.37511	0
0.0623949	2.08542	0
0.512582	6.10539	0
1.65722	5.52149	0
0.272499	5.35822	0
0.0501195	1.73379	52
1.21096	5.2452	0
0.311204	5.03898	0
0.720377	3.44282	284
0.087101	1.14403	0
1.19567	4.53438	0
0.278074	0.493901	0
0.368307	0.633381	0
0.218547	3.36665	189
1.08282	6.05183	0
0.45086	4.0343	138
0.097287	5.06042	0
0.0616765	1.41041	38
1.2473	4.42751	0
0.255682	3.69612	120
0.197156	0.639803	0
0.696297	1.06678	16
0.0614226	4.35781	25
0.352971	3.90485	106
0.249915	1.27794	0
0.336349	1.97222	118
0.360759	1.347	0
0.05565	4.73397	0
0.0335309	5.00652	0
0.886083	1.30134	0
0.184173	6.17437	0
0.0184337	4.7462	0
0.0790017	1.75306	62
0.0550686	4.67908	0
0.0237338	1.67902	0
1.0908	5.12657	0
0.278005	5.36879	0
0.203436	1.1869	21
0.368682	6.27418	0
0.190292	5.57468	0
0.430025	1.22316	0
0.798657	4.14471	72
0.207904	6.25157	0
0.134422	4.96401	0
0.484482	0.137674	0
0.182773	1.25462	6
0.137962	4.4757	44
0.41732	3.76768	143
1.65883	4.42786	0
0.183626	4.96263	0
0.134789	0.529781	0
0.71686	5.00868	0
0.0951713	2.89929	134
0.387605	6.28229	0
0.198837	1.28874	0
0.121949	4.52559	0
0.786429	5.11555	0
0.095243	5.21992	0
1.05725	5.40662	0
0.135922	0.350981	0
0.375078	1.39606	1
0.565104	1.11971	9
0.310711	1.25747	0
0.357959	2.01718	91
1.10316	3.77403	187
1.43514	3.31861	256
0.700142	1.2592	9
0.0521808	1.41646	2
0.182812	0.686848	0
0.823961	6.15503	0
0.126809	4.32462	27
0.127877	4.56659	32
0.079315	1.42897	19
0.126191	4.43958	0
0.294659	1.19028	0
0.170454	5.20834	0
0.288373	2.38437	161
0.115437	4.59334	0
0.109174	3.91172	167
0.173243	2.32944	108
0.0676459	4.95101	0
1.02762	3.38302	317
0.188805	0.455698	0
0.248244	4.06643	124
0.666982	3.82373	240
0.632493	0.350218	16
0.41765	2.69356	275
0.0742138	1.41221	23
1.25653	4.20915	9
0.294457	5.02768	0
0.352205	4.20032	129
0.130493	1.22777	0
0.854136	0.185482	0
0.146171	5.97361	0
1.16365	0.908471	0
0.5929	4.98331	0
0.201772	4.51587	0
0.160217	5.2443	0
0.350228	0.503156	0
0.075775	0.844567	0
0.909297	3.69197	214
0.0405865	1.69126	32
0.0154491	4.74999	0
0.191334	3.06904	179
0.167243	5.83789	0
0.134202	1.63626	16
0.119306	4.43081	49
0.356344	4.40941	63
0.0437562	1.96057	75
0.140097	1.33416	20
1.43599	4.08925	53
1.5281	4.0891	39
0.206086	3.88245	155
0.125909	5.52748	0
1.28404	4.20052	36
0.0444161	4.61151	19
0.0803067	1.35662	0
1.09346	4.20107	45
0.261622	0.208864	0
0.105933	4.74756	0
0.341447	1.34226	0
0.0466519	4.7234	0
0.231308	5.10822	0
0.15449	5.73961	27
0.181157	3.66568	135
0.483461	3.27043	185
0.0519109	4.8493	0
0.0103098	4.66575	0
0.814096	5.03791	0
0.176981	1.35803	8
0.376829	5.29221	0
0.134143	2.32834	64
0.207903	0.858228	0
0.109439	4.69398	0
0.462282	5.15646	0
0.301357	0.995424	9
0.355639	4.07162	101
0.406602	3.21777	283
0.993102	4.33513	9
0.0185691	4.65141	8
0.396874	3.71423	70
1.80493	4.09123	24
0.381997	3.888	134
1.35136	3.76644	168
0.00333103	4.7037	0
0.10578	1.49175	29
0.297581	4.4415	0
0.427026	4.96376	0
0.124063	4.74571	0
0.0392856	4.52998	0
0.0887047	1.32452	0
0.0409817	1.39185	39
0.187539	4.67834	0
0.0774468	4.77803	0
0.130253	1.2094	13
0.0871066	0.244453	0
0.327719	1.2949	0
0.317697	4.43043	1
1.73971	3.03755	227
0.236936	3.89994	87
1.09054	3.43801	276
0.0838128	1.33983	0
1.34522	5.13167	0
0.203108	3.55681	164
1.34298	3.02742	251
0.052089	1.41985	1
0.297987	4.83041	0
0.207298	0.526509	0
0.287816	0.265754	0
1.5664	4.52192	0
0.0538327	4.77803	0
0.153777	2.02593	62
0.145922	1.94665	0
0.332868	5.47053	0
0.157142	4.83629	0
0.209177	4.23518	67
0.0663777	1.10086	9
0.411553	4.89624	0
0.0199865	4.75999	0
0.043649	5.59225	0
1.50464	4.02939	52
0.19666	3.38475	138
0.0556338	4.28167	0
0.326752	5.2965	0
0.382057	5.63811	0
0.228998	2.20668	161
0.478195	4.89714	0
0.131859	5.19453	0
0.133849	5.01123	0
0.0664552	1.86598	63
0.431711	4.54191	0
0.0563486	5.6927	0
0.394615	3.62141	148
0.313712	0.935907	0
0.146581	4.83087	0
0.158014	5.02346	0
0.453018	4.46601	27
0.228558	5.27472	0
0.0951184	1.84921	53
0.578489	4.96978	8
0.0469904	4.78296	13
0.129809	4.83737	0
0.0842961	1.74159	56
0.375321	3.21694	208
0.161697	5.78755	0
0.647973	4.31902	0
0.337019	0.459776	1
0.0498245	1.35065	0
0.0314635	1.30888	0
1.14049	4.09457	69
0.365374	5.76259	0
0.481533	1.22693	0
0.930816	3.89896	152
0.0829761	0.875916	9
0.355482	4.81687	0
0.202399	6.21419	9
0.0778304	4.94554	0
0.229926	3.44073	186
0.243769	3.66561	7
0.795912	4.00185	156
0.0387472	4.75242	0
0.00988705	4.45366	0
0.0486145	4.86327	0
0.0362467	1.68934	3
1.17302	4.08956	74
0.253015	5.65882	0
0.127505	1.4849	9
0.110174	5.26829	0
0.0301024	4.64985	0
0.0906707	4.7429	0
0.488912	1.10608	15
0.226546	4.42089	22
0.0803498	4.5666	19
1.08534	3.84165	185
0.154892	5.76673	0
0.105674	4.77155	0
0.233887	5.14362	0
1.01373	0.608247	0
0.809176	4.96629	0
0.169357	2.61047	204
0.324893	1.98185	100
0.785492	5.19295	0
0.0503732	4.62259	7
0.113709	1.41261	13
1.37201	5.08629	0
1.36238	4.07682	80
0.188803	5.03513	0
0.260398	2.18281	102
0.812006	4.17778	104
0.0431892	1.8384	0
0.600119	3.18842	289
0.184971	1.33457	0
1.04388	5.8319	0
0.604446	4.11263	103
0.178371	5.32986	0
0.0995596	1.89519	74
0.193425	4.58151	10
0.351664	4.09127	154
0.337741	1.24176	0
0.177599	4.56159	4
0.705104	4.60003	0
0.548671	3.57381	233
0.269846	6.14821	0
0.276054	1.30395	58
0.086103	4.32947	0
0.0917095	1.16428	0
1.34365	3.5592	177
0.123335	5.70183	0
0.124088	5.68101	0
1.63988	4.09476	47
0.0264825	4.74653	0
0.0575723	1.41152	1
0.16907	5.55149	0
0.703753	4.3096	73
0.030453	4.4698	61
0.122922	1.30683	26
0.0660972	4.90906	0
0.108804	4.77609	0
0.243789	5.89558	0
0.97649	3.8501	164
0.0524791	4.92749	0
1.75007	4.07873	9
0.0196712	1.73525	0
0.209302	5.62636	0
0.501437	4.43192	9
0.0647771	4.87491	0
0.0266806	1.47175	21
0.571011	6.029	0
0.108236	1.90297	32
0.223687	1.08621	0
0.21452	2.68498	31
0.0724558	4.52185	0
0.0659356	1.0311	0
0.334475	1.24352	2
0.154621	2.22296	84
0.0169334	4.70321	0
0.12989	3.41798	73
0.559686	5.36335	0
0.109296	0.12114	9
0.979871	3.90659	194
0.120289	4.13123	113
1.05452	3.43612	239
0.0438182	1.82498	72
1.41513	0.240189	11
0.428487	0.00346813	0
0.103315	0.878114	9
1.3597	2.42341	165
0.11374	5.53929	0
0.0251743	4.95278	0
0.381288	0.432685	7
0.0300245	1.5132	19
0.0154124	4.63532	45
0.161296	2.32933	126
0.952057	2.34258	143
0.221296	3.57974	141
0.199553	1.09451	0
0.19905	4.60888	0
0.199288	2.44433	175
1.05553	4.44336	0
0.003743	4.71679	0
0.0618867	1.69895	54
1.62155	3.88407	92
0.0766683	2.42611	9
1.04185	2.20035	167
0.0913925	5.07276	0
0.467384	1.27961	1
0.022131	4.83049	0
0.381002	4.93223	0
0.192488	5.16015	0
0.0487331	1.91774	58
0.343393	5.71816	0
0.210585	5.37621	0
1.63256	4.50796	0
0.110361	1.74875	39
0.313583	0.694003	0
1.47597	4.4922	0
0.268785	5.2382	0
0.0624804	4.84513	0
0.482679	2.04458	127
0.281737	6.16237	0
0.124394	4.28943	37
0.0144626	4.84044	0
0.206601	0.861582	0
1.44227	2.62826	251
0.20367	5.45294	0
0.850439	3.91147	140
0.2229	5.55418	0
0.386351	4.33588	79
0.530943	3.46613	48
0.134867	4.477	29
0.175689	4.78951	0
0.00539747	1.55298	65
1.1059	3.92618	144
0.195901	5.32334	0
0.251393	4.92227	0
0.512918	2.77996	235
0.215541	6.12783	0
0.185544	3.24077	17
0.402266	6.11539	0
0.249064	0.193611	0
0.331453	3.56973	192
1.30363	3.67883	161
0.238625	5.54369	0
0.049025	4.8794	0
0.35806	5.08478	0
0.0560396	1.85625	12
1.52745	4.11142	10
0.088724	4.94994	0
0.215455	2.85208	53
0.212325	0.697149	0
0.514076	4.36159	55
0.0568226	1.37951	10
1.33966	3.95099	91
0.0489978	4.78798	0
0.0100164	1.60454	49
1.21468	4.2699	31
0.0908917	0.907936	0
1.28854	4.19341	19
0.359462	5.5747	0
0.283621	4.93027	0
0.168419	1.70012	31
0.0260179	4.76061	0
0.100985	1.06906	0
0.0280491	4.71676	0
0.996638	2.15764	111
0.206197	5.69976	0
0.189977	5.35441	0
0.061184	1.46345	27
0.22491	4.60951	0
0.0114116	4.76852	0
0.960515	5.37413	0
0.0504539	3.2023	44
0.170686	4.79167	5
1.21283	3.62536	215
0.106404	2.78084	160
0.599006	4.40285	1
0.0676363	4.93804	0
0.00840624	4.74515	0
0.261739	0.122042	0
0.238265	2.86205	163
1.19813	3.86916	128
1.35029	4.31093	9
0.166343	3.92194	85
0.153177	1.40875	9
0.317576	4.52142	0
1.39421	5.16079	0
0.388421	4.86977	0
0.111022	4.90267	0
0.0630703	1.29914	1
1.5132	3.9148	94
0.0726279	4.85368	0
0.703825	4.43031	9
0.0493085	0.0368345	9
0.0768941	1.49115	0
0.0733813	4.61501	0
0.939234	2.82916	194
0.0120555	1.74665	19
1.65766	3.92497	65
0.0847743	4.9008	0
0.0836722	5.79803	0
1.33855	3.32115	200
0.00876231	1.55867	36
0.011517	4.69536	0
0.6659	5.43734	0
0.16415	5.66467	0
0.112793	0.945966	9
0.103386	4.76692	0
0.127653	2.10828	95
0.0922379	1.56206	0
0.00814465	4.72707	0
1.19812	4.30692	0
0.478773	3.98812	136
0.0874053	0.46402	14
0.115371	1.28279	0
0.482413	4.99626	0
0.13867	5.22818	0
0.0264628	1.47549	42
0.139964	4.1608	121
0.0565975	5.34118	0
1.67147	3.52398	122
0.116722	0.151771	0
0.00490747	4.72422	0
0.0774497	4.44489	0
0.0991873	4.97392	0
0.746101	4.41539	0
0.309277	3.5145	138
0.0122792	1.83282	0
1.80157	3.86095	38
0.227179	4.18186	74
0.142166	0.773152	0
0.371904	5.49953	0
0.1928	1.38618	9
0.91831	3.30791	94
1.20658	3.43651	191
0.155031	0.405596	0
0.242059	0.860947	0
0.293869	4.95699	0
0.331653	5.12724	0
1.69222	3.88453	119
0.215519	3.34132	173
0.15942	0.162034	0
0.663935	5.11702	0
0.177564	4.22574	81
0.0316245	1.4584	0
0.142998	2.65685	143
0.18548	3.8248	49
0.292771	3.44878	62
1.09234	3.82992	174
0.189888	1.32275	0
1.32231	0.538077	0
0.0968204	5.7006	0
0.174317	4.54941	17
0.0500745	4.29708	63
1.02098	0.0391387	0
0.781052	3.38551	210
0.813085	4.21042	59
0.297504	0.257515	0
0.105692	4.39356	0
0.177768	4.80379	0
0.0370697	0.576808	0
0.102655	4.76988	0
0.968597	4.37495	0
0.673188	1.04205	0
1.03352	3.45043	234
0.153555	5.43723	0
0.259087	1.28113	0
0.819814	4.40077	10
0.193589	2.29244	150
0.101976	0.152432	0
0.320163	0.923077	0
0.00717325	4.70157	0
0.141007	1.38774	0
0.0435079	4.74174	0
0.695017	1.08844	4
0.120869	0.208559	0
0.0246975	4.65236	0
1.1009	4.02267	0
0.0139416	4.70606	0
0.0524165	3.94084	122
1.33772	1.97861	20
0.869704	3.55058	192
0.116893	5.86012	0
0.182469	5.9806	0
0.0230659	4.55126	0
0.393998	1.20589	9
1.63799	4.05905	29
0.135657	4.5463	37
0.078841	1.82424	62
0.0229155	4.73864	0
0.333166	5.36975	0
0.193515	2.45719	190
0.906577	4.12194	7
0.198233	4.4585	11
0.109365	1.38072	20
0.035892	4.64198	11
0.0398616	4.27798	138
0.138644	4.94917	0
0.305894	5.65168	0
0.0424976	4.94833	0
0.386245	5.35746	0
0.252608	5.34601	0
1.29955	3.72536	182
0.00958221	1.45948	19
0.508775	5.31702	0
0.0213947	4.87746	0
0.598427	1.29271	9
0.0592511	4.39195	46
0.084081	5.85206	0
0.731511	4.46903	0
0.369415	1.24194	2
0.213458	4.47712	0
1.09438	2.40835	182
0.435901	4.55257	0
0.13398	2.23195	31
0.309262	0.497354	0
0.282697	4.39921	0
0.0339697	4.78335	0
0.0922545	1.07725	0
0.463458	4.43373	0
0.061391	4.81867	0
0.504978	4.52812	0
0.247454	4.2691	29
0.0606428	5.91851	0
0.377432	1.25599	0
0.278589	4.80792	0
0.546401	4.38846	60
1.55037	3.46304	198
0.137902	4.09232	96
0.133274	1.2579	9
1.74752	3.73509	118
0.105372	0.705464	0
0.420917	0.818469	5
0.980259	5.90557	0
0.0679397	4.92638	9
0.154202	0.792797	0
0.0911017	4.76085	0
0.140502	1.98213	68
0.214759	4.41839	9
0.152526	4.75461	0
0.325666	2.81512	131
0.0853707	5.38209	0
0.217169	5.56453	7
0.141096	2.15855	139
0.871673	5.81873	7
0.0152497	1.94116	12
0.20498	4.44495	84
0.255576	5.26484	0
0.180286	2.01538	74
0.482622	4.02503	146
0.160872	0.109271	9
1.12745	4.42157	0
0.498063	3.93055	148
1.67057	4.31567	0
0.124478	4.96464	0
0.0508854	4.50389	57
0.0025306	1.57536	26
1.39757	2.47797	198
0.160237	0.877592	0
0.297525	5.8706	0
0.11769	1.08346	0
0.0757195	4.19259	18
0.672094	3.70694	210
0.0453396	5.35027	0
0.263505	1.32548	0
0.274099	5.15033	0
0.680605	4.88965	0
0.119644	4.87741	0
0.101791	1.8495	60
1.25768	5.32177	0
0.0551927	4.79261	0
0.360522	0.0977722	4
0.0504483	1.32906	0
0.125444	5.44549	0
0.891084	4.11813	82
0.906722	3.71131	197
0.10458	3.07717	147
0.124319	4.77419	0
0.0461713	4.61422	0
0.0659864	1.34565	0
0.0178664	4.71992	13
0.0906846	4.97371	0
0.0462258	4.84225	10
0.0694834	1.70092	16
1.34646	3.93863	146
0.0415807	4.91456	0
0.0425591	1.33786	8
0.7011	3.68537	173
0.121169	5.71928	0
0.178919	1.37952	11
0.387989	1.11459	0
0.146319	2.01991	47
0.0232361	4.81972	0
0.759492	3.67751	203
0.736347	5.06404	0
0.220715	5.29622	0
0.0207738	1.48148	4
0.319251	4.47907	0
0.00335213	1.54866	22
0.0492312	4.57307	0
1.22082	4.01387	2
1.93695	0.251172	0
1.2438	2.72022	219
0.761019	4.97814	0
0.509867	4.08014	125
0.0848449	4.35576	0
1.11034	4.39578	0
0.255055	1.21921	1
1.31067	3.69749	191
0.150836	4.18539	120
0.195197	3.56426	173
0.341884	2.59261	111
0.56607	5.25194	0
0.871993	3.39845	40
0.317876	5.21068	1
0.0500183	4.85097	0
0.00423504	6.15287	29
0.304651	1.32117	0
0.295608	4.54596	9
0.0617973	1.73637	51
1.93529	3.98159	38
0.463471	4.85881	0
0.0314848	4.63702	0
0.329998	5.10191	0
0.186874	0.406618	0
0.155551	4.99728	0
1.20375	4.936	0
0.16754	4.53479	0
0.589659	2.56274	94
0.350799	5.78736	0
0.0707973	1.39533	0
0.0326902	4.76219	0
0.139827	5.18467	9
0.369504	4.95189	0
0.144967	2.7306	175
1.58041	3.72026	199
0.993805	4.05294	91
0.0981954	5.07706	0
0.0216974	4.70205	0
0.187098	2.53648	159
0.509988	3.82669	153
0.151823	5.50943	0
0.123503	4.61113	0
0.14201	5.53487	0
0.0679552	1.4024	0
0.726645	2.8125	307
0.0513176	1.36507	0
0.825703	2.83361	267
0.172794	5.88647	0
0.327713	1.22926	0
0.186471	3.2544	81
0.204667	0.241958	0
1.31136	4.51911	0
0.206508	5.2594	0
0.168847	0.248111	1
0.223851	2.79666	142
0.0493038	1.38239	0
0.020421	3.21307	0
1.1004	2.75373	150
0.317296	0.787083	0
0.137374	6.02712	0
1.08953	4.00013	108
0.0622343	5.07475	3
0.189281	0.830214	0
1.09731	4.08875	115
0.213457	0.287189	0
1.03098	4.33684	0
0.0698205	4.8824	0
0.19441	0.233758	0
0.139524	6.00128	0
0.515674	0.375873	0
0.0892912	5.53121	0
0.878556	1.28624	0
0.0262431	4.68576	0
0.164898	1.10462	1

## Sheet: E
Time (ms)	Mean value (spikes/s)	Upper s.e.m. value (spikes/s)	Lower s.e.m. (spikes/s)
-50	56.1432	73.3865	38.8999
-49	55.7658	72.8349	38.6967
-48	55.4649	72.3095	38.6203
-47	55.2383	71.8152	38.6614
-46	55.1147	71.3789	38.8505
-45	55.105	71.0756	39.1343
-44	55.3679	70.9809	39.7548
-43	55.5814	70.8923	40.2704
-42	56.0208	71.0505	40.9911
-41	56.3286	71.078	41.5792
-40	56.8227	71.2996	42.3457
-39	57.4343	71.7061	43.1625
-38	58.0667	72.1622	43.9712
-37	58.8996	72.9456	44.8536
-36	59.7111	73.7211	45.7011
-35	60.6185	74.6792	46.5579
-34	61.5764	75.7558	47.397
-33	62.6848	77.0931	48.2765
-32	64.1316	78.8995	49.3637
-31	65.546	80.6946	50.3974
-30	67.0388	82.628	51.4495
-29	68.8813	85.0387	52.7239
-28	70.7479	87.452	54.0438
-27	72.7765	90.0586	55.4944
-26	75.2181	93.1746	57.2617
-25	77.7616	96.3458	59.1775
-24	80.3307	99.5337	61.1278
-23	83.261	103.188	63.3344
-22	86.2877	106.901	65.674
-21	89.5619	110.948	68.1753
-20	92.9881	115.159	70.8172
-19	96.5003	119.433	73.568
-18	100.189	123.97	76.4084
-17	103.965	128.623	79.3065
-16	107.735	133.289	82.1808
-15	111.597	138.106	85.0886
-14	115.357	142.818	87.8951
-13	119.203	147.722	90.6827
-12	122.921	152.488	93.3546
-11	126.574	157.237	95.9118
-10	130.095	161.87	98.3195
-9	133.449	166.293	100.604
-8	136.653	170.626	102.681
-7	139.698	174.766	104.631
-6	142.317	178.414	106.22
-5	144.479	181.56	107.399
-4	146.492	184.479	108.506
-3	148.202	186.992	109.412
-2	149.496	188.989	110.003
-1	150.446	190.57	110.321
0	151.028	191.674	110.382
1	151.278	192.356	110.2
2	151.093	192.451	109.735
3	150.601	192.137	109.065
4	149.661	191.21	108.112
5	148.408	189.847	106.969
6	146.997	188.284	105.711
7	145.284	186.274	104.293
8	143.35	183.95	102.75
9	141.23	181.35	101.11
10	139.005	178.564	99.4473
11	136.595	175.517	97.6738
12	134.208	172.439	95.976
13	131.61	169.11	94.1109
14	128.984	165.674	92.2946
15	126.292	162.171	90.4131
16	123.672	158.675	88.6693
17	121	155.142	86.8583
18	118.427	151.725	85.13
19	115.829	148.278	83.381
20	113.163	144.747	81.5795
21	110.495	141.229	79.7604
22	107.775	137.636	77.9147
23	105.248	134.284	76.2126
24	102.694	130.983	74.4042
25	100.103	127.603	72.604
26	97.6472	124.377	70.9174
27	95.0272	120.948	69.1064
28	92.5883	117.754	67.4223
29	90.1902	114.595	65.7855
30	87.6932	111.295	64.0913
31	85.4377	108.3	62.5757
32	83.2815	105.394	61.1694
33	80.9698	102.258	59.6818
34	79.119	99.7556	58.4825
35	77.2504	97.1507	57.3501
36	75.3373	94.4726	56.202
37	73.5085	91.9158	55.1013
38	71.8092	89.4902	54.1282
39	70.1725	87.1923	53.1527
40	68.5968	84.9757	52.2179
41	67.0795	82.8782	51.2807
42	65.6175	80.8924	50.3425
43	64.2565	79.0544	49.4586
44	62.8319	77.1671	48.4967
45	61.5649	75.5499	47.5799
46	60.356	73.9781	46.7338
47	59.2039	72.5691	45.8388
48	58.025	71.1762	44.8738
49	56.8296	69.7469	43.9123
50	55.788	68.5884	42.9875

## Sheet: F
Time (ms)	Mean value (red)	Upper s.e.m. value (red)	Lower s.e.m. (red)	Mean value (blue)	Upper s.e.m. value (blue)	Lower s.e.m. (blue)	Mean value (light blue)	Upper s.e.m. value (light blue)	Lower s.e.m. (light blue)
-50	38.5227	49.8337	27.2118	43.8007	51.1974	36.404	44.9427	50.6528	39.2327
-49	39.5399	50.8593	28.2206	43.1082	50.4143	35.8022	44.9833	50.6367	39.33
-48	40.5601	51.8775	29.2427	42.4347	49.6371	35.2322	44.9632	50.5521	39.3743
-47	41.6076	52.9195	30.2957	41.7857	48.8893	34.6821	44.889	50.4087	39.3692
-46	42.6723	53.9734	31.3712	41.1412	48.1354	34.1471	44.8009	50.2488	39.3531
-45	43.7417	55.0267	32.4567	40.4885	47.3658	33.6113	44.6487	50.0269	39.2705
-44	44.9334	56.2132	33.6537	39.8643	46.6201	33.1084	44.3941	49.6942	39.094
-43	46.0762	57.3205	34.8319	39.2453	45.8838	32.6067	44.1313	49.3553	38.9072
-42	47.0928	58.3125	35.8731	38.6329	45.1414	32.1243	43.8313	48.9843	38.6783
-41	48.1944	59.4548	36.934	38.0556	44.4414	31.6698	43.433	48.5154	38.3505
-40	49.2553	60.5547	37.956	37.4842	43.7421	31.2262	43.0282	48.0445	38.0119
-39	50.1019	61.4008	38.803	36.9415	43.0739	30.8091	42.5262	47.4775	37.575
-38	50.9939	62.3708	39.6171	36.4385	42.4459	30.4311	42.0591	46.9556	37.1627
-37	51.7898	63.2594	40.3203	35.9293	41.8088	30.0497	41.561	46.4056	36.7164
-36	52.4816	64.055	40.9081	35.4455	41.2007	29.6904	41.0349	45.8385	36.2313
-35	53.0136	64.687	41.3402	34.9785	40.6052	29.3518	40.4938	45.2578	35.7298
-34	53.4927	65.2767	41.7088	34.5096	40.011	29.0082	39.9567	44.6871	35.2263
-33	53.9834	65.9326	42.0341	34.0821	39.4569	28.7074	39.4367	44.1427	34.7307
-32	54.2643	66.3217	42.2069	33.6759	38.9267	28.4252	38.9065	43.5903	34.2227
-31	54.4375	66.5895	42.2855	33.2535	38.3773	28.1297	38.3947	43.0559	33.7335
-30	54.8385	67.0598	42.6171	32.8395	37.838	27.8409	37.9181	42.5641	33.2722
-29	54.9207	67.2055	42.636	32.4456	37.3207	27.5706	37.4443	42.0735	32.815
-28	55.0086	67.3491	42.6682	32.1373	36.9015	27.3731	37.0113	41.6255	32.3972
-27	55.0043	67.3926	42.616	31.8147	36.4658	27.1636	36.5975	41.1953	31.9997
-26	54.8726	67.2913	42.454	31.517	36.07	26.9639	36.1947	40.7768	31.6126
-25	54.9824	67.4697	42.4951	31.2903	35.7552	26.8254	35.8413	40.4077	31.2748
-24	54.9458	67.4702	42.4214	31.0775	35.4605	26.6946	35.4401	39.9812	30.899
-23	54.9878	67.6127	42.3629	30.8954	35.2047	26.586	35.0795	39.5985	30.5605
-22	55.0565	67.7974	42.3156	30.7198	34.964	26.4755	34.7056	39.1947	30.2165
-21	55.2299	68.1514	42.3084	30.6081	34.7994	26.4168	34.3235	38.7838	29.8633
-20	55.3574	68.4269	42.2879	30.54	34.6844	26.3956	33.9601	38.3861	29.5341
-19	55.6068	68.8559	42.3578	30.4602	34.5614	26.3591	33.613	38.0065	29.2194
-18	55.9169	69.3581	42.4756	30.4029	34.4616	26.3442	33.2622	37.6236	28.9008
-17	56.2887	69.9318	42.6457	30.3876	34.4133	26.362	32.8883	37.2157	28.5609
-16	56.8524	70.7056	42.9991	30.3536	34.3448	26.3623	32.5371	36.832	28.2423
-15	57.3312	71.4066	43.2557	30.3313	34.2952	26.3674	32.1784	36.4386	27.9181
-14	57.9932	72.3256	43.6608	30.2949	34.2306	26.3593	31.8386	36.0735	27.6036
-13	58.7171	73.2921	44.1421	30.2399	34.1465	26.3332	31.4782	35.6868	27.2697
-12	59.4282	74.2458	44.6105	30.1438	34.0189	26.2686	31.1549	35.337	26.9727
-11	60.1938	75.2746	45.113	30.0315	33.878	26.1849	30.8566	35.0185	26.6946
-10	60.948	76.2828	45.6131	29.8926	33.708	26.0772	30.561	34.7053	26.4166
-9	61.7512	77.3729	46.1295	29.7306	33.5152	25.946	30.2918	34.4213	26.1622
-8	62.519	78.4228	46.6152	29.5383	33.291	25.7857	30.0573	34.1799	25.9348
-7	63.2317	79.4064	47.057	29.2976	33.0171	25.5781	29.8292	33.9431	25.7154
-6	63.9029	80.3252	47.4806	29.0495	32.7318	25.3672	29.6351	33.7463	25.5239
-5	64.5805	81.2482	47.9129	28.7465	32.3902	25.1029	29.4683	33.5789	25.3578
-4	65.1714	82.0481	48.2946	28.4916	32.1039	24.8793	29.3466	33.4602	25.2329
-3	65.6188	82.6888	48.5488	28.2126	31.7886	24.6367	29.2384	33.3523	25.1245
-2	66.1629	83.3717	48.9541	27.9131	31.4555	24.3706	29.1746	33.2917	25.0576
-1	66.3536	83.6422	49.065	27.6134	31.1241	24.1028	29.081	33.1961	24.9658
0	66.565	83.8726	49.2574	27.3543	30.8392	23.8694	29.0348	33.1525	24.9172
1	66.8062	84.1197	49.4928	27.0787	30.5383	23.6191	28.9824	33.1003	24.8644
2	67.0842	84.397	49.7713	26.8469	30.2877	23.4061	28.9333	33.0455	24.8212
3	67.2507	84.5327	49.9687	26.6067	30.031	23.1824	28.8743	32.9808	24.7678
4	67.2528	84.4709	50.0347	26.3709	29.7815	22.9602	28.7938	32.8903	24.6973
5	67.4567	84.6617	50.2516	26.159	29.5621	22.7558	28.6948	32.7756	24.6139
6	67.7158	84.9419	50.4897	25.9698	29.3672	22.5724	28.5863	32.6496	24.5229
7	68.0652	85.3654	50.7649	25.7797	29.1748	22.3846	28.4678	32.5114	24.4241
8	68.7367	86.1889	51.2845	25.5802	28.9732	22.1873	28.3187	32.341	24.2964
9	69.4298	87.0552	51.8044	25.3783	28.7668	21.9898	28.1629	32.1575	24.1682
10	70.3562	88.2496	52.4628	25.1988	28.588	21.8097	28.0113	31.9797	24.0429
11	71.5432	89.8094	53.277	24.9881	28.3713	21.6049	27.8005	31.7385	23.8625
12	72.9146	91.6091	54.2201	24.7735	28.1486	21.3984	27.587	31.4916	23.6824
13	74.6643	93.8871	55.4416	24.5666	27.9329	21.2004	27.3647	31.2402	23.4893
14	76.6419	96.4506	56.8333	24.3477	27.7016	20.9937	27.1493	30.9918	23.3068
15	78.7348	99.1505	58.3192	24.1039	27.4407	20.767	26.9265	30.7384	23.1145
16	81.2227	102.323	60.1228	23.8571	27.1733	20.5409	26.6763	30.4592	22.8934
17	84.0239	105.889	62.1587	23.6137	26.9104	20.3169	26.4296	30.1807	22.6784
18	87.0049	109.641	64.3692	23.363	26.6377	20.0883	26.2147	29.9413	22.488
19	90.1363	113.561	66.7118	23.1069	26.3616	19.8522	25.981	29.6841	22.2778
20	93.6086	117.873	69.3439	22.8248	26.056	19.5936	25.7817	29.4662	22.0972
21	97.1585	122.27	72.0475	22.546	25.7561	19.3359	25.5617	29.2291	21.8944
22	100.859	126.877	74.8418	22.2794	25.4759	19.0829	25.36	29.0116	21.7084
23	104.489	131.365	77.6119	21.9999	25.1793	18.8204	25.1481	28.7867	21.5095
24	108.158	135.902	80.4138	21.7281	24.8947	18.5616	24.9451	28.5719	21.3183
25	111.768	140.345	83.19	21.4606	24.6183	18.3029	24.7227	28.3378	21.1075
26	115.168	144.533	85.8028	21.1688	24.3185	18.0191	24.4913	28.0926	20.8899
27	118.532	148.723	88.3417	20.8743	24.0153	17.7333	24.2516	27.8384	20.6648
28	121.616	152.598	90.6346	20.5818	23.7138	17.4497	23.9917	27.561	20.4225
29	124.241	155.981	92.5016	20.3025	23.424	17.181	23.6904	27.2357	20.1451
30	126.877	159.376	94.3775	19.9935	23.1011	16.886	23.3763	26.8947	19.858
31	129.047	162.246	95.8482	19.6705	22.7586	16.5823	23.0265	26.5156	19.5375
32	131.085	165.009	97.1602	19.3526	22.4199	16.2852	22.6419	26.0933	19.1905
33	132.57	167.134	98.0063	19.046	22.0886	16.0035	22.2168	25.6242	18.8095
34	133.541	168.686	98.3959	18.7093	21.7217	15.6969	21.7319	25.0861	18.3778
35	134.215	169.895	98.5346	18.3634	21.3408	15.386	21.2388	24.5361	17.9416
36	134.53	170.714	98.3465	18.0257	20.9692	15.0823	20.6905	23.9217	17.4592
37	134.518	171.105	97.93	17.6629	20.5672	14.7585	20.11	23.2721	16.9478
38	134.039	170.956	97.123	17.2897	20.1533	14.4262	19.4804	22.5647	16.3961
39	133.284	170.468	96.1008	16.9084	19.7305	14.0862	18.8038	21.8043	15.8033
40	132.221	169.619	94.823	16.5534	19.3337	13.773	18.0738	20.982	15.1657
41	130.888	168.447	93.3297	16.195	18.9366	13.4533	17.3185	20.1309	14.5061
42	129.261	166.87	91.6523	15.8221	18.5251	13.1191	16.5596	19.2737	13.8455
43	127.395	164.997	89.7934	15.4512	18.1216	12.7809	15.759	18.3717	13.1462
44	125.441	162.951	87.9317	15.0822	17.7185	12.4459	14.9816	17.4938	12.4693
45	123.306	160.623	85.9888	14.7357	17.3425	12.1288	14.1926	16.6007	11.7845
46	121.22	158.32	84.1194	14.3698	16.9457	11.7938	13.4316	15.7434	11.1197
47	119.04	155.875	82.2051	14.0281	16.575	11.4812	12.666	14.8841	10.448
48	116.798	153.349	80.2473	13.6756	16.1921	11.159	11.9295	14.0587	9.80037
49	114.764	150.969	78.5599	13.3342	15.8184	10.85	11.2223	13.2689	9.17577
50	112.658	148.487	76.829	12.998	15.4488	10.5473	10.5511	12.5215	8.58074
51	110.597	146.027	75.1674	12.6698	15.0871	10.2525	9.93814	11.8408	8.03546
52	108.661	143.713	73.61	12.3507	14.731	9.97041	9.37075	11.2173	7.52422
53	106.651	141.297	72.0046	12.0379	14.3778	9.69803	8.83478	10.6332	7.03636
54	104.792	139.013	70.5709	11.7597	14.0594	9.45994	8.37541	10.1381	6.61273
55	103.149	136.937	69.3623	11.4936	13.7533	9.23394	7.95942	9.69398	6.22487
56	101.562	134.97	68.154	11.256	13.4785	9.03355	7.61569	9.332	5.89939
57	99.9778	132.947	67.0089	11.0691	13.2612	8.87703	7.34565	9.06115	5.63015
58	98.5996	131.182	66.0167	10.8946	13.0548	8.73432	7.11969	8.83863	5.40075
59	97.34	129.588	65.0918	10.7434	12.879	8.60772	6.9468	8.676	5.21759
60	95.9835	127.848	64.1186	10.6516	12.7727	8.53051	6.8316	8.5815	5.0817
61	94.7298	126.189	63.2706	10.5694	12.6813	8.4575	6.76773	8.54548	4.98998
62	93.6144	124.701	62.5278	10.5859	12.7033	8.46854	6.74123	8.54884	4.93361
63	92.5793	123.317	61.8416	10.6278	12.759	8.49656	6.78471	8.62751	4.94191
64	91.5052	121.895	61.1152	10.7064	12.8614	8.55137	6.84304	8.72401	4.96206
65	90.5816	120.681	60.4822	10.8154	13.0021	8.62863	6.97097	8.89782	5.04411
66	89.5787	119.341	59.8164	10.9821	13.2075	8.75678	7.10866	9.07843	5.13889
67	88.5068	117.87	59.1438	11.1749	13.4477	8.90201	7.28242	9.29679	5.26806
68	87.5839	116.629	58.5391	11.3958	13.7185	9.07303	7.49748	9.56388	5.43107
69	86.626	115.266	57.986	11.6179	13.9875	9.2482	7.73993	9.85312	5.62674
70	85.7434	114.044	57.4427	11.8764	14.2989	9.4538	8.01929	10.1811	5.85751
71	84.9024	112.867	56.9377	12.1294	14.6019	9.65691	8.31315	10.5229	6.10342
72	83.9419	111.56	56.3239	12.3942	14.915	9.87341	8.64241	10.8995	6.38534
73	83.1697	110.44	55.8992	12.6577	15.2217	10.0938	8.99552	11.3012	6.68985
74	82.4119	109.333	55.4907	12.9155	15.5155	10.3155	9.39755	11.7509	7.04424
75	81.544	108.059	55.0292	13.1802	15.8146	10.5458	9.81119	12.2119	7.41051
76	80.6791	106.839	54.5192	13.4063	16.0687	10.7439	10.2766	12.7264	7.82684
77	79.9467	105.797	54.0965	13.6273	16.3156	10.939	10.7513	13.2491	8.25362
78	79.1708	104.661	53.6803	13.8431	16.5507	11.1356	11.2516	13.7987	8.70443
79	78.2864	103.404	53.1688	14.0505	16.7784	11.3226	11.7656	14.3632	9.16804
80	77.4663	102.182	52.7505	14.2413	16.987	11.4955	12.3115	14.9609	9.66203
81	76.5908	100.963	52.2188	14.3953	17.1545	11.636	12.8743	15.5711	10.1775
82	75.8155	99.8294	51.8016	14.5324	17.3053	11.7594	13.462	16.2097	10.7143
83	74.9581	98.5735	51.3426	14.6749	17.4601	11.8896	14.055	16.8515	11.2586
84	74.2107	97.4922	50.9292	14.8032	17.6039	12.0026	14.6619	17.5058	11.818
85	73.346	96.2881	50.4038	14.9332	17.7501	12.1163	15.2654	18.1556	12.3752
86	72.5901	95.1219	50.0584	15.0278	17.8558	12.1999	15.8728	18.8076	12.938
87	71.8334	94.0613	49.6054	15.1313	17.9692	12.2934	16.4656	19.4435	13.4878
88	71.0165	92.8868	49.1462	15.2044	18.0517	12.3572	17.0503	20.0691	14.0314
89	70.2097	91.734	48.6853	15.2914	18.1471	12.4356	17.6241	20.682	14.5663
90	69.4016	90.6062	48.197	15.3489	18.2085	12.4894	18.1558	21.2503	15.0613
91	68.4344	89.2908	47.5779	15.4048	18.267	12.5426	18.6747	21.8081	15.5413
92	67.715	88.3152	47.1148	15.4418	18.3036	12.58	19.1645	22.3334	15.9955
93	66.9434	87.273	46.6138	15.4811	18.3383	12.6238	19.6151	22.8197	16.4105
94	66.1779	86.2527	46.1031	15.5217	18.3735	12.6699	20.0081	23.2464	16.7697
95	65.3776	85.2258	45.5293	15.5386	18.3814	12.6958	20.3373	23.6043	17.0703
96	64.5625	84.1846	44.9404	15.5837	18.4219	12.7455	20.6133	23.9061	17.3204
97	63.8468	83.2478	44.4458	15.6139	18.4451	12.7827	20.8471	24.1641	17.5301
98	63.233	82.4732	43.9928	15.6511	18.4785	12.8238	21.0375	24.3783	17.6967
99	62.6115	81.7003	43.5227	15.6845	18.5097	12.8593	21.1798	24.5417	17.8179
100	62.0318	81.0146	43.049	15.7146	18.5407	12.8886	21.2508	24.626	17.8756
101	61.5411	80.4285	42.6536	15.7475	18.578	12.917	21.2768	24.6648	17.8887
102	61.0897	79.8884	42.2909	15.7988	18.6401	12.9576	21.2471	24.6411	17.853
103	60.7409	79.4994	41.9825	15.8559	18.7118	13.0001	21.1664	24.5594	17.7735
104	60.3621	79.076	41.6483	15.9202	18.7976	13.0428	21.0567	24.4475	17.6658
105	59.8968	78.5228	41.2707	15.9738	18.8729	13.0747	20.919	24.3016	17.5363
106	59.5575	78.174	40.941	16.0183	18.9422	13.0943	20.7646	24.1327	17.3964
107	59.2181	77.8151	40.6211	16.0727	19.0241	13.1213	20.6094	23.9589	17.26
108	58.768	77.3791	40.1569	16.1198	19.0949	13.1448	20.4379	23.7653	17.1105
109	58.4006	76.9972	39.8039	16.1482	19.1457	13.1508	20.2699	23.5729	16.967
110	57.9717	76.547	39.3963	16.1771	19.1955	13.1587	20.1054	23.3792	16.8316
111	57.5521	76.101	39.0033	16.1896	19.2226	13.1567	19.9719	23.2199	16.7238
112	57.087	75.648	38.526	16.184	19.224	13.1439	19.8529	23.0745	16.6314
113	56.4908	74.9995	37.982	16.1381	19.1761	13.1001	19.7851	22.9831	16.5871
114	55.7099	74.1028	37.3171	16.0706	19.1035	13.0377	19.7628	22.9437	16.582
115	54.9168	73.1971	36.6365	16.001	19.024	12.978	19.7816	22.9529	16.6104
116	54.0447	72.1879	35.9014	15.8868	18.8894	12.8842	19.8259	22.9852	16.6667
117	53.2121	71.1477	35.2766	15.7635	18.7423	12.7848	19.9428	23.1	16.7856
118	52.2041	69.8956	34.5127	15.625	18.5774	12.6725	20.1065	23.2641	16.9488
119	51.1956	68.6103	33.7809	15.4678	18.3895	12.5462	20.3026	23.4647	17.1405
120	50.0388	67.1075	32.9701	15.2833	18.176	12.3906	20.5495	23.7255	17.3735
121	48.9748	65.6907	32.2588	15.0843	17.9454	12.2231	20.8374	24.0287	17.646
122	47.9572	64.3427	31.5718	14.8918	17.7259	12.0577	21.1465	24.3574	17.9356
123	46.8948	62.8807	30.9088	14.6844	17.4932	11.8755	21.4941	24.7275	18.2608
124	45.7563	61.3173	30.1954	14.481	17.2674	11.6946	21.8283	25.0833	18.5733
125	44.7805	59.9167	29.6443	14.2823	17.0567	11.5078	22.2117	25.4913	18.9321
126	43.7997	58.4689	29.1305	14.0926	16.8544	11.3307	22.5998	25.9072	19.2924
127	42.9352	57.1981	28.6723	13.9201	16.679	11.1612	22.9521	26.2807	19.6235
128	42.0778	55.9582	28.1973	13.7652	16.5214	11.0091	23.3134	26.6673	19.9595
129	41.3402	54.8391	27.8412	13.6139	16.3695	10.8584	23.6862	27.0686	20.3039
130	40.6539	53.7921	27.5156	13.4742	16.2293	10.7191	24.0115	27.4164	20.6066
131	40.012	52.8121	27.212	13.331	16.0846	10.5775	24.3221	27.7514	20.8928
132	39.3056	51.7531	26.8582	13.2053	15.9553	10.4553	24.6065	28.0565	21.1566
133	38.7608	50.971	26.5507	13.0833	15.8273	10.3392	24.8379	28.3051	21.3707
134	38.2322	50.1868	26.2777	12.967	15.7025	10.2315	25.0376	28.5183	21.5569
135	37.6892	49.4048	25.9737	12.8767	15.6007	10.1527	25.1862	28.6742	21.6983
136	37.0193	48.4539	25.5847	12.7902	15.5007	10.0797	25.3078	28.8013	21.8142
137	36.4317	47.6696	25.1937	12.7181	15.4135	10.0227	25.3912	28.8851	21.8972
138	35.8496	46.9294	24.7698	12.677	15.3591	9.99499	25.43	28.9198	21.9403
139	35.1538	46.0629	24.2446	12.6476	15.321	9.97417	25.4388	28.9215	21.9561
140	34.3882	45.138	23.6383	12.6346	15.2992	9.97008	25.3857	28.8563	21.9152
141	33.5504	44.1533	22.9475	12.651	15.3138	9.98821	25.2931	28.747	21.8392
142	32.6413	43.1107	22.1719	12.6647	15.328	10.0014	25.1752	28.6148	21.7356
143	31.5662	41.899	21.2334	12.6976	15.366	10.0293	24.9895	28.4071	21.5718
144	30.555	40.785	20.325	12.7338	15.4116	10.056	24.7816	28.1764	21.3869
145	29.388	39.5245	19.2514	12.8115	15.5102	10.1129	24.5244	27.8912	21.1576
146	28.2517	38.2927	18.2108	12.8796	15.6029	10.1564	24.2467	27.5852	20.9082
147	27.092	37.0797	17.1043	12.9717	15.7253	10.2181	23.9203	27.2282	20.6124
148	25.9219	35.7961	16.0477	13.0556	15.8429	10.2684	23.5783	26.8553	20.3013
149	24.8041	34.6137	14.9945	13.1539	15.9786	10.3293	23.2476	26.4965	19.9988
150	23.6895	33.4278	13.9513	13.263	16.1266	10.3994	22.8899	26.1085	19.6712
151	22.5442	32.1595	12.9289	13.3451	16.2443	10.446	22.5114	25.6983	19.3246
152	21.4924	31.0253	11.9594	13.438	16.3705	10.5054	22.136	25.2916	18.9804
153	20.4791	29.9135	11.0448	13.5128	16.4757	10.5498	21.7799	24.908	18.6519
154	19.5126	28.8313	10.1939	13.5742	16.561	10.5873	21.4477	24.5506	18.3448
155	18.5979	27.7838	9.41202	13.6068	16.6128	10.6008	21.1351	24.2167	18.0536
156	17.7371	26.7733	8.70092	13.647	16.665	10.629	20.8449	23.9073	17.7825
157	16.8803	25.7067	8.05387	13.6592	16.6861	10.6323	20.5693	23.612	17.5267
158	16.1358	24.7925	7.47916	13.6594	16.6904	10.6284	20.3392	23.3737	17.3047
159	15.4332	23.9027	6.96365	13.6561	16.6864	10.6257	20.1574	23.1839	17.131
160	14.7663	23.0326	6.50006	13.6778	16.7081	10.6475	20.0027	23.0236	16.9818
161	14.1451	22.2287	6.06148	13.6606	16.6876	10.6337	19.9067	22.932	16.8814
162	13.5135	21.3522	5.67476	13.6414	16.6632	10.6195	19.8592	22.8941	16.8243
163	12.9603	20.5696	5.35101	13.6399	16.6587	10.621	19.8515	22.9011	16.802
164	12.4813	19.848	5.11457	13.6662	16.6869	10.6456	19.868	22.9384	16.7975
165	11.9625	19.0814	4.8435	13.7148	16.745	10.6846	19.9198	23.0172	16.8225
166	11.4027	18.2775	4.52787	13.7696	16.8072	10.732	20.0141	23.1457	16.8826
167	10.9139	17.5273	4.3004	13.8562	16.9089	10.8035	20.156	23.3286	16.9833
168	10.4328	16.7836	4.08209	13.9689	17.0367	10.9012	20.3124	23.527	17.0978
169	9.96414	16.0539	3.8744	14.0951	17.18	11.0101	20.5063	23.7704	17.2422
170	9.41511	15.2229	3.60736	14.2488	17.3528	11.1448	20.7155	24.0286	17.4025
171	8.96628	14.5085	3.42401	14.4206	17.5472	11.2939	20.9578	24.3319	17.5837
172	8.60596	13.9315	3.28042	14.6615	17.8161	11.5069	21.1992	24.6375	17.7609
173	8.27792	13.4043	3.15153	14.8969	18.0764	11.7174	21.431	24.9326	17.9293
174	7.99132	12.9428	3.03988	15.1421	18.3436	11.9406	21.654	25.2212	18.0869
175	7.75417	12.5612	2.94713	15.4236	18.6513	12.1959	21.9146	25.5524	18.2768
176	7.52353	12.2195	2.82754	15.7173	18.9738	12.4608	22.1449	25.8536	18.4363
177	7.41512	12.0421	2.78813	16.0131	19.2973	12.7289	22.3598	26.1392	18.5805
178	7.43167	12.094	2.76935	16.3146	19.6275	13.0018	22.5885	26.4372	18.7398
179	7.46273	12.1628	2.76265	16.6008	19.9382	13.2633	22.7948	26.7082	18.8814
180	7.55591	12.3396	2.77217	16.8865	20.251	13.5221	22.9967	26.9757	19.0178
181	7.65775	12.5683	2.7472	17.1752	20.5714	13.7791	23.1839	27.2216	19.1462
182	7.87312	12.9466	2.79967	17.4406	20.8645	14.0167	23.3608	27.4529	19.2687
183	8.19418	13.4534	2.93499	17.6706	21.1221	14.2191	23.5254	27.6654	19.3854
184	8.50084	13.9681	3.03354	17.8713	21.3495	14.393	23.6742	27.8528	19.4957
185	8.83255	14.5191	3.14603	18.0966	21.6093	14.5839	23.7987	28.0086	19.5888
186	9.1789	15.0871	3.2707	18.2515	21.7903	14.7127	23.9226	28.1589	19.6863
187	9.52946	15.6534	3.40549	18.3852	21.9559	14.8145	24.0122	28.2658	19.7586
188	9.87428	16.2003	3.54823	18.4884	22.0894	14.8874	24.0857	28.3488	19.8226
189	10.2705	16.8303	3.71078	18.5752	22.2123	14.9381	24.1615	28.4349	19.8881
190	10.6001	17.3321	3.86814	18.6469	22.3197	14.9741	24.2081	28.4836	19.9327
191	10.9074	17.7861	4.02873	18.6838	22.3928	14.9748	24.2537	28.5269	19.9805
192	11.1402	18.1435	4.13685	18.7034	22.4508	14.9559	24.2964	28.5695	20.0233
193	11.4087	18.5035	4.31396	18.7198	22.5085	14.931	24.324	28.5907	20.0572
194	11.6484	18.8111	4.4857	18.6927	22.5181	14.8674	24.3388	28.5992	20.0783
195	11.8621	19.0734	4.65076	18.6752	22.5414	14.8089	24.3943	28.6471	20.1416
196	12.0535	19.2998	4.80718	18.6391	22.5456	14.7325	24.412	28.6525	20.1715
197	12.1777	19.4118	4.94371	18.6049	22.55	14.6599	24.4348	28.6673	20.2022
198	12.3507	19.6241	5.07724	18.554	22.5349	14.5731	24.4915	28.7134	20.2696
199	12.511	19.8297	5.19219	18.5194	22.5389	14.5	24.5763	28.793	20.3596
200	12.6624	20.0393	5.28545	18.5083	22.5717	14.445	24.6623	28.8727	20.4518
