# Supplementary material for: Instantaneous movement-unrelated midbrain activity modifies ongoing eye movements
Source: eLife. 2021 May 6;10:e64150. doi: 10.7554/eLife.64150 (PMC8143798; doi:10.7554/eLife.64150)
Supplement: Figure 11—source data 1. [file elife-64150-fig11-data1.xlsx]

## Sheet: A-left panel
Time (ms)	Mean value	Upper s.e.m. value	Lower s.e.m.
-50	0.54275	0.559516	0.525984
-49	0.543971	0.560818	0.527125
-48	0.545216	0.562145	0.528286
-47	0.546609	0.563621	0.529596
-46	0.548064	0.565171	0.530956
-45	0.549617	0.566817	0.532416
-44	0.55129	0.568591	0.533988
-43	0.553057	0.570467	0.535647
-42	0.555048	0.57257	0.537526
-41	0.557076	0.574705	0.539446
-40	0.559304	0.577055	0.541554
-39	0.561455	0.579328	0.543582
-38	0.563947	0.581947	0.545947
-37	0.566541	0.584662	0.54842
-36	0.569186	0.587421	0.55095
-35	0.571991	0.590338	0.553644
-34	0.575011	0.593448	0.556574
-33	0.578241	0.596757	0.559726
-32	0.581583	0.600161	0.563004
-31	0.585303	0.603927	0.566678
-30	0.58917	0.607806	0.570534
-29	0.593153	0.61178	0.574526
-28	0.597323	0.61591	0.578736
-27	0.601804	0.620327	0.583282
-26	0.606496	0.624934	0.588057
-25	0.611485	0.629836	0.593133
-24	0.616775	0.635038	0.598512
-23	0.622305	0.640488	0.604123
-22	0.628352	0.646464	0.61024
-21	0.634475	0.652537	0.616412
-20	0.64088	0.658924	0.622836
-19	0.647756	0.665821	0.62969
-18	0.654842	0.672965	0.63672
-17	0.662319	0.680554	0.644084
-16	0.669923	0.688322	0.651524
-15	0.677945	0.696551	0.659339
-14	0.686066	0.704931	0.667201
-13	0.694221	0.713379	0.675063
-12	0.702543	0.722041	0.683046
-11	0.711011	0.73087	0.691153
-10	0.719227	0.73947	0.698984
-9	0.72745	0.748091	0.70681
-8	0.73532	0.756356	0.714284
-7	0.742991	0.764418	0.721565
-6	0.75029	0.772075	0.728505
-5	0.757167	0.779284	0.73505
-4	0.763649	0.786058	0.74124
-3	0.769395	0.792051	0.74674
-2	0.774374	0.797211	0.751537
-1	0.778953	0.801937	0.755968
0	0.782785	0.805854	0.759716
1	0.785721	0.808813	0.762629
2	0.787907	0.810979	0.764834
3	0.789407	0.812414	0.7664
4	0.789998	0.812899	0.767098
5	0.789742	0.812517	0.766966
6	0.788831	0.811466	0.766197
7	0.787062	0.809551	0.764572
8	0.784666	0.807013	0.762318
9	0.78146	0.80367	0.75925
10	0.777711	0.799803	0.755619
11	0.773402	0.795394	0.751409
12	0.768436	0.790341	0.746532
13	0.762958	0.784792	0.741123
14	0.756955	0.778731	0.735179
15	0.750458	0.772183	0.728734
16	0.743614	0.765285	0.721944
17	0.736448	0.758065	0.714831
18	0.728925	0.750466	0.707383
19	0.721235	0.742699	0.69977
20	0.713421	0.73479	0.692052
21	0.705386	0.726645	0.684127
22	0.697271	0.718394	0.676147
23	0.68907	0.710038	0.668103
24	0.680891	0.701688	0.660094
25	0.672705	0.693307	0.652103
26	0.664538	0.684932	0.644145
27	0.656508	0.676676	0.636341
28	0.648486	0.668427	0.628546
29	0.640831	0.660531	0.621131
30	0.63345	0.652902	0.613997
31	0.626191	0.645399	0.606983
32	0.619196	0.638168	0.600223
33	0.612506	0.631246	0.593765
34	0.606066	0.624576	0.587556
35	0.599929	0.618235	0.581624
36	0.594113	0.612235	0.575991
37	0.588505	0.606463	0.570547
38	0.583281	0.601098	0.565465
39	0.578572	0.596276	0.560867
40	0.574014	0.591629	0.5564
41	0.569737	0.587289	0.552185
42	0.56593	0.583449	0.548412
43	0.562461	0.579976	0.544947
44	0.559139	0.576673	0.541605
45	0.556303	0.573883	0.538723
46	0.55376	0.571414	0.536106
47	0.551452	0.569194	0.53371
48	0.549436	0.567292	0.531581
49	0.547767	0.565747	0.529788
50	0.546205	0.564315	0.528095

## Sheet: A-right panel
Time (ms)	Mean value (red)	Upper s.e.m. value (red)	Lower s.e.m. (red)	Mean value (blue)	Upper s.e.m. value (blue)	Lower s.e.m. (blue)	Mean value (light blue)	Upper s.e.m. value (light blue)	Lower s.e.m. (light blue)
-50	0.470185	0.485834	0.454536	0.468657	0.472841	0.464473	0.469273	0.473375	0.465172
-49	0.472692	0.488387	0.456996	0.468124	0.472311	0.463937	0.46877	0.472874	0.464666
-48	0.475113	0.490863	0.459362	0.467598	0.471788	0.463407	0.468265	0.47237	0.464159
-47	0.477562	0.493373	0.461752	0.467051	0.471243	0.462858	0.467739	0.471845	0.463632
-46	0.479949	0.49582	0.464078	0.466509	0.470703	0.462314	0.46722	0.471326	0.463114
-45	0.482222	0.498149	0.466296	0.465931	0.470127	0.461735	0.466675	0.470781	0.462569
-44	0.48432	0.500295	0.468344	0.465324	0.469519	0.461128	0.466087	0.470191	0.461984
-43	0.486232	0.502244	0.47022	0.464722	0.468917	0.460527	0.465509	0.46961	0.461408
-42	0.48783	0.503857	0.471803	0.464089	0.468283	0.459896	0.46491	0.469007	0.460813
-41	0.489378	0.505413	0.473343	0.463464	0.467655	0.459273	0.464302	0.468395	0.46021
-40	0.490654	0.506681	0.474626	0.462815	0.467002	0.458628	0.463686	0.467774	0.459599
-39	0.4918	0.507796	0.475803	0.462164	0.466346	0.457982	0.463058	0.467139	0.458978
-38	0.492717	0.50867	0.476765	0.461509	0.465685	0.457333	0.46242	0.466493	0.458348
-37	0.4935	0.509389	0.47761	0.460845	0.465014	0.456677	0.461782	0.465846	0.457718
-36	0.494126	0.509952	0.4783	0.460207	0.464367	0.456046	0.461163	0.465218	0.457109
-35	0.494593	0.510341	0.478845	0.459568	0.463718	0.455417	0.460541	0.464585	0.456497
-34	0.495002	0.510676	0.479327	0.458964	0.463104	0.454823	0.459952	0.463985	0.455919
-33	0.495296	0.510893	0.479699	0.458364	0.462493	0.454235	0.459369	0.46339	0.455348
-32	0.495575	0.511102	0.480047	0.457802	0.46192	0.453684	0.458806	0.462815	0.454797
-31	0.495779	0.511245	0.480313	0.457258	0.461363	0.453153	0.458273	0.46227	0.454277
-30	0.496078	0.511491	0.480664	0.456732	0.460825	0.452639	0.457757	0.461741	0.453772
-29	0.496351	0.511723	0.480978	0.456237	0.460317	0.452156	0.457271	0.461243	0.453298
-28	0.496694	0.512042	0.481347	0.455768	0.459836	0.451699	0.456799	0.46076	0.452838
-27	0.496943	0.51227	0.481615	0.455327	0.459384	0.45127	0.456346	0.460297	0.452396
-26	0.497184	0.512504	0.481864	0.454931	0.458978	0.450884	0.455933	0.459874	0.451992
-25	0.497621	0.512938	0.482304	0.454526	0.458562	0.450489	0.455525	0.459457	0.451594
-24	0.498199	0.513519	0.482879	0.454141	0.458169	0.450113	0.455119	0.459043	0.451195
-23	0.498673	0.51399	0.483356	0.453801	0.457822	0.44978	0.454761	0.458678	0.450843
-22	0.499317	0.514629	0.484005	0.453461	0.457476	0.449446	0.454377	0.45829	0.450464
-21	0.499911	0.515215	0.484607	0.45312	0.457131	0.44911	0.453979	0.457888	0.45007
-20	0.500652	0.515939	0.485365	0.452757	0.456764	0.44875	0.453568	0.457474	0.449662
-19	0.501341	0.516601	0.486081	0.452404	0.456408	0.4484	0.453167	0.457071	0.449263
-18	0.501943	0.517164	0.486721	0.452048	0.456051	0.448045	0.45274	0.456643	0.448837
-17	0.502722	0.517895	0.487549	0.45168	0.455682	0.447677	0.4523	0.456203	0.448398
-16	0.50352	0.518654	0.488387	0.451259	0.455262	0.447256	0.451809	0.455711	0.447907
-15	0.504309	0.519399	0.489219	0.450837	0.454841	0.446834	0.451307	0.45521	0.447404
-14	0.505152	0.5202	0.490104	0.450379	0.454383	0.446374	0.45077	0.454673	0.446866
-13	0.506145	0.521172	0.491119	0.449892	0.453898	0.445886	0.450215	0.454119	0.446311
-12	0.507224	0.522243	0.492206	0.44937	0.453377	0.445363	0.44963	0.453534	0.445725
-11	0.508409	0.523436	0.493381	0.448809	0.452817	0.444801	0.449007	0.452912	0.445102
-10	0.509701	0.524756	0.494646	0.448233	0.452241	0.444224	0.448374	0.452278	0.444469
-9	0.51112	0.526225	0.496015	0.447625	0.451634	0.443617	0.447725	0.451629	0.443821
-8	0.512533	0.527714	0.497352	0.447022	0.451031	0.443014	0.447081	0.450985	0.443178
-7	0.514231	0.529514	0.498948	0.446384	0.450392	0.442375	0.44642	0.450322	0.442517
-6	0.516044	0.531463	0.500624	0.445721	0.449728	0.441714	0.44575	0.449651	0.44185
-5	0.518015	0.53359	0.50244	0.445067	0.449072	0.441062	0.445106	0.449004	0.441208
-4	0.520215	0.535974	0.504455	0.444415	0.448418	0.440413	0.444458	0.448353	0.440563
-3	0.522521	0.53848	0.506562	0.443773	0.447772	0.439775	0.443831	0.447722	0.439939
-2	0.52506	0.541244	0.508875	0.443145	0.44714	0.43915	0.443226	0.447114	0.439338
-1	0.527582	0.543996	0.511167	0.442559	0.44655	0.438569	0.442653	0.446536	0.438769
0	0.530262	0.546907	0.513618	0.442021	0.446006	0.438035	0.442133	0.446012	0.438253
1	0.533106	0.549977	0.516235	0.441505	0.445486	0.437525	0.441641	0.445516	0.437766
2	0.536148	0.553229	0.519068	0.441049	0.445025	0.437074	0.441198	0.445068	0.437328
3	0.539284	0.556557	0.522012	0.440653	0.444623	0.436683	0.440809	0.444675	0.436944
4	0.542428	0.559872	0.524983	0.440306	0.444272	0.43634	0.44046	0.444321	0.436598
5	0.545687	0.563269	0.528106	0.440012	0.443974	0.43605	0.44015	0.444007	0.436292
6	0.549023	0.566707	0.531339	0.43981	0.443769	0.435851	0.439909	0.443763	0.436055
7	0.552406	0.570162	0.53465	0.439658	0.443615	0.435701	0.439699	0.443551	0.435848
8	0.555788	0.573583	0.537992	0.43956	0.443516	0.435604	0.439545	0.443395	0.435695
9	0.5593	0.5771	0.541499	0.439554	0.44351	0.435598	0.439459	0.443309	0.43561
10	0.562972	0.580746	0.545199	0.439607	0.443566	0.435649	0.439415	0.443266	0.435564
11	0.566702	0.584422	0.548981	0.4397	0.443661	0.435739	0.43941	0.443263	0.435558
12	0.570493	0.588137	0.55285	0.439836	0.443801	0.435871	0.439438	0.443294	0.435583
13	0.574369	0.591925	0.556814	0.440002	0.443973	0.436032	0.439502	0.443361	0.435642
14	0.57844	0.595906	0.560974	0.440216	0.444193	0.436239	0.43961	0.443475	0.435746
15	0.582654	0.600044	0.565265	0.440444	0.444429	0.43646	0.439745	0.443615	0.435874
16	0.587031	0.604354	0.569708	0.440702	0.444694	0.43671	0.439915	0.443792	0.436038
17	0.591559	0.608844	0.574275	0.440941	0.444941	0.436941	0.440076	0.44396	0.436192
18	0.596344	0.61363	0.579057	0.441154	0.445161	0.437146	0.440233	0.444123	0.436342
19	0.601229	0.618545	0.583914	0.441381	0.445396	0.437366	0.440414	0.444311	0.436517
20	0.606218	0.623607	0.588829	0.441586	0.445608	0.437564	0.440588	0.444491	0.436685
21	0.611342	0.62884	0.593843	0.441747	0.445775	0.437719	0.440745	0.444654	0.436837
22	0.616794	0.634443	0.599145	0.441862	0.445894	0.43783	0.440884	0.444796	0.436971
23	0.622241	0.640071	0.604411	0.441925	0.44596	0.43789	0.440995	0.44491	0.437079
24	0.627913	0.645956	0.609869	0.441936	0.445973	0.4379	0.441077	0.444994	0.43716
25	0.633686	0.651971	0.615402	0.441868	0.445904	0.437831	0.441113	0.44503	0.437195
26	0.639649	0.658188	0.621111	0.441764	0.445799	0.437729	0.441111	0.445028	0.437194
27	0.645589	0.664395	0.626782	0.441595	0.445628	0.437563	0.441095	0.445011	0.43718
28	0.651489	0.67057	0.632407	0.441398	0.445427	0.437369	0.44104	0.444953	0.437127
29	0.657324	0.676679	0.637969	0.441143	0.445168	0.437118	0.440946	0.444856	0.437037
30	0.663078	0.682705	0.643452	0.440833	0.444852	0.436813	0.44081	0.444716	0.436904
31	0.668788	0.688662	0.648913	0.440485	0.4445	0.43647	0.44065	0.444553	0.436748
32	0.674246	0.694355	0.654137	0.4401	0.44411	0.43609	0.440461	0.44436	0.436562
33	0.679511	0.699832	0.65919	0.439687	0.443693	0.435681	0.44025	0.444146	0.436355
34	0.684372	0.704876	0.663868	0.439256	0.443258	0.435254	0.440011	0.443904	0.436118
35	0.688961	0.709613	0.668309	0.438794	0.442793	0.434795	0.43974	0.443632	0.435848
36	0.693309	0.714082	0.672535	0.438277	0.442274	0.43428	0.439412	0.443303	0.43552
37	0.697211	0.718069	0.676353	0.437776	0.441772	0.43378	0.439102	0.442994	0.43521
38	0.700602	0.72151	0.679695	0.437274	0.44127	0.433277	0.438772	0.442665	0.434879
39	0.703469	0.724398	0.682539	0.436736	0.440734	0.432738	0.438384	0.44228	0.434488
40	0.705966	0.72688	0.685052	0.436162	0.440162	0.432162	0.43795	0.441849	0.434051
41	0.708036	0.728907	0.687166	0.435585	0.439588	0.431581	0.437517	0.44142	0.433614
42	0.70953	0.730346	0.688715	0.434977	0.438983	0.43097	0.437038	0.440945	0.43313
43	0.710583	0.731304	0.689861	0.434355	0.438367	0.430344	0.436532	0.440444	0.432619
44	0.711187	0.731796	0.690579	0.43368	0.437696	0.429664	0.435963	0.439881	0.432046
45	0.711346	0.731837	0.690856	0.432973	0.436994	0.428953	0.435347	0.43927	0.431425
46	0.711051	0.731417	0.690685	0.432225	0.43625	0.428201	0.434678	0.438605	0.430752
47	0.710445	0.730689	0.6902	0.431432	0.435459	0.427404	0.433947	0.437877	0.430017
48	0.709548	0.729691	0.689404	0.430604	0.434635	0.426574	0.433179	0.437111	0.429247
49	0.708368	0.728412	0.688325	0.429731	0.433762	0.425699	0.432368	0.436301	0.428435
50	0.706838	0.726793	0.686882	0.4288	0.432832	0.424768	0.431476	0.435408	0.427543
51	0.705153	0.725049	0.685257	0.427814	0.431844	0.423784	0.430522	0.434452	0.426591
52	0.703173	0.723036	0.683311	0.426829	0.430857	0.422802	0.429557	0.433484	0.42563
53	0.701276	0.721129	0.681423	0.425784	0.429807	0.421761	0.42852	0.432442	0.424597
54	0.699142	0.719011	0.679272	0.424732	0.428748	0.420715	0.427475	0.43139	0.42356
55	0.69701	0.71693	0.677089	0.423664	0.427673	0.419655	0.426403	0.43031	0.422496
56	0.694763	0.714754	0.674772	0.422601	0.426602	0.418601	0.425335	0.429233	0.421437
57	0.692557	0.71264	0.672475	0.421547	0.425538	0.417556	0.424265	0.428153	0.420377
58	0.690334	0.710536	0.670133	0.420504	0.424486	0.416523	0.423224	0.427101	0.419346
59	0.688218	0.708552	0.667884	0.419498	0.423469	0.415527	0.422204	0.426071	0.418337
60	0.686125	0.706596	0.665655	0.418539	0.422499	0.414579	0.421236	0.425091	0.41738
61	0.683954	0.704553	0.663356	0.417661	0.42161	0.413711	0.420346	0.424191	0.416501
62	0.681857	0.702594	0.66112	0.416836	0.420775	0.412897	0.419516	0.42335	0.415682
63	0.679848	0.700714	0.658982	0.416105	0.420034	0.412176	0.418794	0.422619	0.41497
64	0.677712	0.698702	0.656722	0.415499	0.419419	0.411578	0.418206	0.422021	0.414391
65	0.675632	0.696723	0.65454	0.414999	0.418911	0.411087	0.417741	0.421547	0.413934
66	0.673601	0.694772	0.65243	0.414615	0.41852	0.410711	0.417412	0.421211	0.413612
67	0.671495	0.692719	0.650271	0.414351	0.418249	0.410453	0.417221	0.421013	0.413428
68	0.669328	0.690576	0.648081	0.414213	0.418106	0.410321	0.417174	0.420961	0.413386
69	0.667028	0.688267	0.645788	0.414217	0.418105	0.410329	0.417287	0.42107	0.413503
70	0.664775	0.68598	0.64357	0.414348	0.418233	0.410463	0.417546	0.421327	0.413766
71	0.662435	0.683581	0.641288	0.414616	0.418499	0.410734	0.417966	0.421744	0.414187
72	0.660077	0.681145	0.63901	0.415032	0.418914	0.411151	0.418544	0.422322	0.414766
73	0.657697	0.678666	0.636728	0.415547	0.419428	0.411667	0.419245	0.423024	0.415467
74	0.655334	0.67619	0.634477	0.416203	0.420084	0.412321	0.420108	0.423888	0.416328
75	0.652957	0.67369	0.632224	0.416953	0.420836	0.41307	0.421056	0.424838	0.417274
76	0.650666	0.671273	0.63006	0.417814	0.421699	0.413929	0.422145	0.42593	0.41836
77	0.648209	0.668683	0.627734	0.418784	0.422671	0.414897	0.423349	0.427138	0.41956
78	0.645968	0.666337	0.625598	0.419809	0.423698	0.41592	0.42461	0.428403	0.420818
79	0.64383	0.664116	0.623543	0.420917	0.424809	0.417025	0.425954	0.429751	0.422158
80	0.641736	0.661955	0.621516	0.422079	0.425974	0.418185	0.427355	0.431155	0.423554
81	0.639712	0.65989	0.619533	0.423306	0.427202	0.419409	0.428812	0.432616	0.425008
82	0.637742	0.657903	0.61758	0.424552	0.428451	0.420654	0.430286	0.434093	0.426478
83	0.635818	0.655984	0.615653	0.425818	0.429718	0.421918	0.431778	0.435589	0.427967
84	0.634032	0.654228	0.613836	0.427117	0.431019	0.423215	0.433292	0.437105	0.429478
85	0.632158	0.652398	0.611918	0.428379	0.432281	0.424476	0.434768	0.438584	0.430952
86	0.630461	0.650752	0.61017	0.429617	0.43352	0.425714	0.436214	0.440032	0.432396
87	0.628848	0.649196	0.6085	0.430821	0.434725	0.426917	0.437634	0.441453	0.433814
88	0.627023	0.647422	0.606623	0.43203	0.435935	0.428124	0.439044	0.442866	0.435222
89	0.625236	0.645674	0.604798	0.43318	0.437087	0.429273	0.440399	0.444223	0.436575
90	0.623342	0.643802	0.602882	0.434273	0.438181	0.430364	0.4417	0.445527	0.437874
91	0.621445	0.641913	0.600976	0.435327	0.439238	0.431416	0.442956	0.446786	0.439127
92	0.619284	0.639737	0.598832	0.436306	0.44022	0.432392	0.444144	0.447977	0.440311
93	0.617001	0.637423	0.596578	0.43722	0.441137	0.433303	0.445278	0.449114	0.441442
94	0.614517	0.634892	0.594141	0.438058	0.441978	0.434137	0.446342	0.450182	0.442503
95	0.611814	0.63213	0.591497	0.438854	0.442779	0.43493	0.447364	0.451208	0.44352
96	0.609015	0.629263	0.588766	0.439574	0.443503	0.435645	0.448307	0.452155	0.444458
97	0.606053	0.626231	0.585875	0.440218	0.444152	0.436284	0.449181	0.453035	0.445328
98	0.602869	0.622977	0.582761	0.440813	0.444751	0.436875	0.449999	0.453857	0.446141
99	0.59955	0.619593	0.579507	0.44136	0.445304	0.437417	0.450754	0.454618	0.44689
100	0.596029	0.616017	0.576041	0.441823	0.445772	0.437875	0.45141	0.45528	0.447541
101	0.59248	0.612425	0.572535	0.442219	0.446172	0.438265	0.451982	0.455857	0.448107
102	0.588895	0.608806	0.568984	0.442571	0.446529	0.438613	0.452484	0.456365	0.448603
103	0.585202	0.605092	0.565312	0.442873	0.446836	0.438909	0.452921	0.456808	0.449034
104	0.581436	0.601307	0.561564	0.443119	0.447087	0.439151	0.453279	0.457171	0.449386
105	0.577633	0.597493	0.557772	0.443315	0.447288	0.439342	0.453544	0.457443	0.449646
106	0.573893	0.593744	0.554042	0.443463	0.447441	0.439486	0.453734	0.457638	0.44983
107	0.570054	0.589898	0.55021	0.443571	0.447553	0.43959	0.453846	0.457755	0.449938
108	0.566354	0.586185	0.546524	0.443627	0.447612	0.439642	0.453871	0.457784	0.449959
109	0.562656	0.582463	0.542848	0.443661	0.447648	0.439673	0.453852	0.457768	0.449936
110	0.558982	0.578748	0.539216	0.443666	0.447655	0.439677	0.453777	0.457695	0.449859
111	0.555274	0.574976	0.535571	0.443619	0.447609	0.43963	0.453614	0.457533	0.449695
112	0.551487	0.571107	0.531867	0.443553	0.447542	0.439564	0.4534	0.457319	0.449481
113	0.5478	0.567313	0.528286	0.443452	0.44744	0.439465	0.453133	0.457051	0.449215
114	0.54415	0.563535	0.524765	0.443323	0.447308	0.439338	0.452821	0.456736	0.448905
115	0.540499	0.559727	0.521271	0.443177	0.447158	0.439196	0.452474	0.456385	0.448562
116	0.536726	0.55577	0.517683	0.443036	0.447013	0.43906	0.452123	0.456031	0.448216
117	0.533061	0.551897	0.514226	0.442894	0.446864	0.438924	0.451754	0.455655	0.447852
118	0.529287	0.547892	0.510681	0.442739	0.446703	0.438776	0.451379	0.455274	0.447484
119	0.525426	0.543789	0.507063	0.442587	0.446544	0.43863	0.45101	0.454899	0.447122
120	0.521597	0.539702	0.503492	0.442454	0.446404	0.438504	0.450667	0.454548	0.446785
121	0.517768	0.535608	0.499928	0.442325	0.446268	0.438383	0.450334	0.454209	0.44646
122	0.513998	0.531576	0.49642	0.442214	0.446149	0.438278	0.450027	0.453895	0.44616
123	0.510312	0.527636	0.492988	0.442099	0.446028	0.43817	0.449729	0.453589	0.445869
124	0.506707	0.523792	0.489621	0.442024	0.445947	0.438102	0.449476	0.45333	0.445622
125	0.503043	0.5199	0.486186	0.441975	0.445893	0.438058	0.44926	0.453108	0.445411
126	0.499605	0.516264	0.482946	0.441988	0.445901	0.438075	0.449104	0.452947	0.445261
127	0.496309	0.512801	0.479816	0.442002	0.445912	0.438092	0.448968	0.452807	0.445129
128	0.49323	0.50959	0.476871	0.442064	0.445972	0.438155	0.448893	0.452729	0.445057
129	0.490329	0.50658	0.474078	0.442151	0.446059	0.438243	0.448841	0.452675	0.445007
130	0.487679	0.503863	0.471495	0.442321	0.44623	0.438412	0.448861	0.452695	0.445027
131	0.485162	0.501304	0.469019	0.442475	0.446387	0.438563	0.448872	0.452707	0.445037
132	0.482899	0.499033	0.466766	0.442682	0.446598	0.438766	0.448936	0.452773	0.445099
133	0.480788	0.496938	0.464638	0.4429	0.446821	0.438979	0.449	0.45284	0.44516
134	0.47893	0.495121	0.462739	0.443137	0.447064	0.43921	0.449092	0.452936	0.445248
135	0.477279	0.493535	0.461023	0.443395	0.447329	0.43946	0.449189	0.453038	0.445339
136	0.475821	0.492157	0.459485	0.443663	0.447606	0.439721	0.449281	0.453136	0.445426
137	0.474514	0.490944	0.458085	0.443955	0.447905	0.440004	0.449388	0.453249	0.445526
138	0.473397	0.489927	0.456866	0.444224	0.448183	0.440265	0.449474	0.453342	0.445605
139	0.472412	0.48905	0.455774	0.4445	0.448468	0.440532	0.449552	0.453428	0.445676
140	0.471489	0.488231	0.454748	0.444748	0.448724	0.440772	0.449592	0.453474	0.445709
141	0.470766	0.487616	0.453917	0.444996	0.44898	0.441012	0.449631	0.45352	0.445741
142	0.470007	0.486953	0.453062	0.44522	0.449211	0.441229	0.449629	0.453525	0.445734
143	0.46926	0.486292	0.452227	0.445418	0.449415	0.441421	0.449607	0.453508	0.445706
144	0.468655	0.485763	0.451546	0.445614	0.449617	0.441611	0.44959	0.453497	0.445684
145	0.468015	0.485194	0.450835	0.445771	0.44978	0.441763	0.449531	0.453443	0.445619
146	0.467467	0.484694	0.450241	0.445896	0.449909	0.441884	0.449449	0.453365	0.445532
147	0.467064	0.484333	0.449794	0.445966	0.449982	0.441949	0.449326	0.453247	0.445406
148	0.466555	0.483848	0.449261	0.446028	0.450047	0.442008	0.4492	0.453124	0.445275
149	0.466179	0.483495	0.448862	0.446047	0.45007	0.442024	0.449054	0.452982	0.445126
150	0.465884	0.483228	0.448539	0.446049	0.450075	0.442024	0.448918	0.452849	0.444987
151	0.465564	0.482922	0.448205	0.446037	0.450066	0.442007	0.448777	0.452712	0.444841
152	0.465312	0.482688	0.447937	0.445999	0.450032	0.441966	0.448632	0.452572	0.444692
153	0.46504	0.482429	0.447651	0.445962	0.45	0.441924	0.448506	0.452452	0.444561
154	0.464856	0.482255	0.447456	0.445856	0.449898	0.441813	0.448349	0.4523	0.444398
155	0.464637	0.482046	0.447228	0.445736	0.449784	0.441688	0.448203	0.45216	0.444246
156	0.464523	0.481945	0.447102	0.445623	0.449677	0.441569	0.448082	0.452046	0.444118
157	0.464404	0.481842	0.446966	0.445491	0.449552	0.441429	0.44797	0.451942	0.443999
158	0.464278	0.481732	0.446823	0.445346	0.449414	0.441277	0.447867	0.451847	0.443888
159	0.464134	0.481609	0.446658	0.4452	0.449276	0.441125	0.447778	0.451765	0.44379
160	0.463901	0.481397	0.446405	0.445058	0.449142	0.440975	0.447711	0.451707	0.443715
161	0.463647	0.481165	0.44613	0.444896	0.448987	0.440805	0.447642	0.451646	0.443639
162	0.463439	0.480981	0.445897	0.444736	0.448833	0.440638	0.44758	0.45159	0.443569
163	0.463139	0.480709	0.445569	0.444581	0.448683	0.440478	0.447533	0.45155	0.443516
164	0.462747	0.480345	0.445148	0.444441	0.448548	0.440333	0.447519	0.451541	0.443497
165	0.462361	0.479991	0.444732	0.444282	0.448392	0.440171	0.447487	0.451513	0.443461
166	0.461848	0.479512	0.444184	0.444132	0.448244	0.440019	0.447465	0.451494	0.443436
167	0.46125	0.47895	0.443549	0.444007	0.44812	0.439894	0.447452	0.451481	0.443422
168	0.460577	0.478321	0.442832	0.443874	0.447986	0.439763	0.447431	0.45146	0.443402
169	0.459778	0.477565	0.441991	0.443758	0.447868	0.439649	0.447421	0.451449	0.443393
170	0.459028	0.476869	0.441188	0.44367	0.447777	0.439564	0.447436	0.451461	0.443411
171	0.458241	0.476127	0.440355	0.443613	0.447715	0.439511	0.447469	0.45149	0.443447
172	0.457457	0.475393	0.43952	0.443561	0.447658	0.439464	0.447485	0.451501	0.443468
173	0.456488	0.474473	0.438504	0.443536	0.447628	0.439444	0.447517	0.451529	0.443505
174	0.455703	0.473737	0.437669	0.443534	0.447621	0.439447	0.447555	0.451561	0.443548
175	0.454866	0.472949	0.436783	0.44354	0.447622	0.439459	0.447584	0.451585	0.443583
176	0.454047	0.472184	0.43591	0.44359	0.447666	0.439514	0.447639	0.451634	0.443643
177	0.453264	0.471447	0.435081	0.443657	0.447729	0.439585	0.447687	0.451678	0.443696
178	0.452602	0.470834	0.434369	0.443753	0.447821	0.439685	0.447749	0.451735	0.443762
179	0.45197	0.470251	0.433689	0.44387	0.447935	0.439805	0.447828	0.451811	0.443846
180	0.45139	0.469711	0.433069	0.444028	0.448091	0.439964	0.447928	0.451908	0.443948
181	0.450843	0.469201	0.432484	0.444199	0.448261	0.440137	0.448031	0.452008	0.444053
182	0.450447	0.468843	0.432051	0.4444	0.448461	0.440339	0.448156	0.452132	0.44418
183	0.450143	0.468577	0.431709	0.444615	0.448676	0.440553	0.448285	0.452259	0.444311
184	0.44997	0.468442	0.431498	0.444873	0.448935	0.440811	0.448455	0.452429	0.444481
185	0.449916	0.468434	0.431398	0.445131	0.449195	0.441067	0.448629	0.452603	0.444655
186	0.449894	0.468454	0.431335	0.445442	0.449508	0.441376	0.448852	0.452827	0.444878
187	0.449908	0.468507	0.431309	0.44575	0.449819	0.441681	0.449076	0.453051	0.445101
188	0.450001	0.468634	0.431368	0.446079	0.450151	0.442006	0.449333	0.45331	0.445356
189	0.4502	0.468875	0.431525	0.446397	0.450473	0.442321	0.449598	0.453577	0.445618
190	0.450438	0.469147	0.431728	0.446767	0.450848	0.442686	0.44991	0.453892	0.445927
191	0.45058	0.469308	0.431851	0.447155	0.451242	0.443069	0.450245	0.454231	0.446258
192	0.450857	0.469598	0.432116	0.447575	0.451668	0.443483	0.450623	0.454614	0.446632
193	0.451015	0.469749	0.43228	0.447996	0.452094	0.443897	0.45101	0.455006	0.447013
194	0.451099	0.469812	0.432386	0.448425	0.45253	0.444319	0.451407	0.455408	0.447405
195	0.451061	0.469736	0.432386	0.448853	0.452967	0.44474	0.451813	0.455822	0.447805
196	0.450947	0.469566	0.432328	0.449286	0.453407	0.445165	0.452235	0.45625	0.44822
197	0.450619	0.469165	0.432074	0.449733	0.453863	0.445603	0.452656	0.456679	0.448633
198	0.450251	0.468714	0.431788	0.450183	0.454322	0.446043	0.453085	0.457116	0.449053
199	0.449652	0.468011	0.431293	0.450619	0.454768	0.446469	0.453492	0.457533	0.449451
200	0.448942	0.467188	0.430696	0.451048	0.455208	0.446888	0.45389	0.457941	0.44984

## Sheet: B
Time (ms)	Mean value (red)	Upper s.e.m. value (red)	Lower s.e.m. (red)	Mean value (blue)	Upper s.e.m. value (blue)	Lower s.e.m. (blue)
-50	0.462537	0.468361	0.456714	0.456842	0.458939	0.454744
-49	0.462496	0.468314	0.456678	0.456602	0.458699	0.454505
-48	0.462424	0.468237	0.456611	0.456352	0.458449	0.454254
-47	0.462283	0.46809	0.456476	0.456099	0.458196	0.454001
-46	0.462108	0.467907	0.456308	0.455846	0.457943	0.453748
-45	0.461911	0.467704	0.456118	0.455611	0.457708	0.453514
-44	0.461675	0.46746	0.45589	0.455385	0.457483	0.453288
-43	0.461443	0.46722	0.455666	0.455181	0.457279	0.453083
-42	0.461192	0.466962	0.455422	0.454993	0.45709	0.452895
-41	0.46099	0.466754	0.455226	0.454831	0.456929	0.452733
-40	0.460753	0.466512	0.454994	0.454686	0.456784	0.452588
-39	0.460529	0.466283	0.454774	0.454566	0.456665	0.452468
-38	0.460314	0.466066	0.454562	0.45448	0.456579	0.452381
-37	0.460171	0.465922	0.454419	0.454405	0.456503	0.452306
-36	0.460019	0.46577	0.454268	0.454352	0.456451	0.452253
-35	0.459877	0.465629	0.454125	0.454309	0.456408	0.452211
-34	0.459794	0.465548	0.454039	0.454282	0.45638	0.452183
-33	0.459742	0.465499	0.453985	0.454272	0.456371	0.452174
-32	0.459696	0.465457	0.453935	0.454257	0.456355	0.452159
-31	0.459702	0.465466	0.453938	0.454249	0.456346	0.452151
-30	0.459711	0.465477	0.453944	0.454252	0.45635	0.452154
-29	0.459766	0.465536	0.453997	0.454235	0.456332	0.452138
-28	0.459834	0.465604	0.454064	0.454208	0.456305	0.452112
-27	0.459903	0.465674	0.454132	0.454187	0.456284	0.452091
-26	0.460008	0.465779	0.454237	0.454148	0.456244	0.452052
-25	0.460157	0.465927	0.454387	0.454101	0.456197	0.452006
-24	0.460344	0.466114	0.454574	0.454032	0.456128	0.451937
-23	0.46053	0.466299	0.45476	0.453974	0.456069	0.451879
-22	0.460742	0.466512	0.454972	0.453881	0.455976	0.451786
-21	0.460981	0.466753	0.455209	0.453806	0.455901	0.451712
-20	0.461209	0.466983	0.455435	0.453713	0.455807	0.451618
-19	0.461522	0.4673	0.455744	0.453618	0.455712	0.451523
-18	0.461807	0.46759	0.456025	0.453515	0.455609	0.451421
-17	0.462168	0.467959	0.456378	0.453422	0.455517	0.451328
-16	0.462508	0.468307	0.456709	0.453323	0.455417	0.451229
-15	0.462864	0.468674	0.457055	0.453209	0.455303	0.451116
-14	0.463254	0.469074	0.457434	0.453103	0.455197	0.45101
-13	0.463644	0.469477	0.457812	0.453007	0.4551	0.450914
-12	0.46398	0.469824	0.458136	0.452904	0.454997	0.450811
-11	0.464352	0.470207	0.458496	0.452811	0.454903	0.450718
-10	0.464717	0.470584	0.45885	0.4527	0.454792	0.450608
-9	0.465021	0.470897	0.459146	0.452597	0.454689	0.450506
-8	0.46527	0.471153	0.459387	0.452497	0.454587	0.450406
-7	0.465488	0.471377	0.459599	0.452412	0.454502	0.450322
-6	0.465648	0.47154	0.459756	0.45233	0.454418	0.450241
-5	0.465717	0.47161	0.459824	0.452242	0.454329	0.450154
-4	0.465725	0.471616	0.459833	0.452167	0.454253	0.450081
-3	0.465686	0.471574	0.459798	0.452099	0.454183	0.450014
-2	0.46558	0.471462	0.459698	0.45204	0.454123	0.449956
-1	0.465416	0.471291	0.459542	0.451997	0.454079	0.449915
0	0.465218	0.471084	0.459353	0.451953	0.454034	0.449873
1	0.464919	0.470774	0.459064	0.45192	0.453999	0.449841
2	0.464569	0.470413	0.458725	0.4519	0.453978	0.449822
3	0.464157	0.469989	0.458324	0.451868	0.453944	0.449791
4	0.463671	0.469491	0.45785	0.451834	0.453909	0.449759
5	0.463175	0.468985	0.457364	0.451815	0.453889	0.449741
6	0.462682	0.468483	0.456882	0.451778	0.453851	0.449705
7	0.462174	0.467966	0.456383	0.451723	0.453795	0.449651
8	0.461599	0.467382	0.455815	0.451673	0.453744	0.449602
9	0.461063	0.46684	0.455286	0.451617	0.453687	0.449547
10	0.460484	0.466254	0.454713	0.451566	0.453636	0.449497
11	0.459952	0.465718	0.454186	0.451563	0.453632	0.449495
12	0.459579	0.46534	0.453817	0.451616	0.453683	0.449549
13	0.459242	0.464998	0.453485	0.45179	0.453856	0.449725
14	0.459093	0.464844	0.453341	0.452102	0.454166	0.450039
15	0.459119	0.464865	0.453374	0.452607	0.454667	0.450547
16	0.459341	0.465081	0.453602	0.45333	0.455387	0.451273
17	0.459825	0.465557	0.454094	0.454282	0.456336	0.452228
18	0.460668	0.466391	0.454945	0.45554	0.45759	0.453491
19	0.461854	0.467569	0.456139	0.457144	0.459189	0.455099
20	0.463461	0.469168	0.457753	0.459215	0.461255	0.457175
21	0.465537	0.471237	0.459837	0.461803	0.463837	0.459768
22	0.46817	0.473862	0.462477	0.46501	0.467039	0.462982
23	0.471476	0.477163	0.46579	0.468972	0.470994	0.46695
24	0.475514	0.481196	0.469832	0.473771	0.475786	0.471756
25	0.480309	0.485989	0.474628	0.479508	0.481515	0.4775
26	0.486036	0.491718	0.480353	0.486293	0.488293	0.484293
27	0.492727	0.498415	0.48704	0.49422	0.496213	0.492227
28	0.500423	0.50612	0.494726	0.50339	0.505376	0.501404
29	0.509243	0.514954	0.503532	0.513862	0.515842	0.511882
30	0.519171	0.524901	0.51344	0.525692	0.527668	0.523717
31	0.53024	0.535997	0.524484	0.538938	0.540912	0.536964
32	0.542513	0.548304	0.536723	0.553584	0.555558	0.551609
33	0.555893	0.561726	0.55006	0.569644	0.571622	0.567665
34	0.570458	0.576343	0.564574	0.587069	0.589056	0.585082
35	0.586074	0.592021	0.580126	0.605798	0.607797	0.603798
36	0.602715	0.608737	0.596693	0.625739	0.627756	0.623723
37	0.620372	0.626481	0.614264	0.646801	0.64884	0.644763
38	0.638819	0.645027	0.632611	0.668782	0.670847	0.666717
39	0.658044	0.664363	0.651725	0.691542	0.693638	0.689447
40	0.677788	0.684231	0.671345	0.714882	0.717012	0.712753
41	0.69806	0.704638	0.691482	0.738595	0.740761	0.736429
42	0.718448	0.725172	0.711725	0.762462	0.764667	0.760258
43	0.739024	0.745901	0.732147	0.78626	0.788504	0.784016
44	0.759507	0.766545	0.752469	0.809776	0.81206	0.807493
45	0.77971	0.786914	0.772507	0.832775	0.835098	0.830453
46	0.799508	0.806881	0.792136	0.855025	0.857385	0.852664
47	0.818712	0.826255	0.81117	0.876346	0.878742	0.87395
48	0.837177	0.844888	0.829466	0.896527	0.898957	0.894098
49	0.854649	0.862527	0.846771	0.915381	0.917841	0.912922
50	0.871055	0.879094	0.863015	0.932751	0.935238	0.930264
51	0.886223	0.894416	0.87803	0.948477	0.950988	0.945966
52	0.900065	0.908402	0.891728	0.962463	0.964994	0.959931
53	0.912393	0.920862	0.903923	0.974583	0.977132	0.972035
54	0.923146	0.931734	0.914558	0.984784	0.987346	0.982222
55	0.932191	0.940881	0.9235	0.992965	0.995537	0.990394
56	0.939492	0.948268	0.930717	0.999105	1.00168	0.996528
57	0.944967	0.953808	0.936126	1.00323	1.00581	1.00065
58	0.948552	0.957438	0.939666	1.00528	1.00786	1.0027
59	0.950224	0.959133	0.941314	1.00534	1.00791	1.00277
60	0.949988	0.958899	0.941078	1.00344	1.00601	1.00088
61	0.947876	0.956765	0.938987	0.999649	1.0022	0.997094
62	0.94391	0.952755	0.935064	0.994064	0.996606	0.991522
63	0.938126	0.946907	0.929345	0.986801	0.989327	0.984276
64	0.930622	0.939319	0.921926	0.977979	0.980487	0.975471
65	0.921442	0.930035	0.912848	0.967765	0.970253	0.965276
66	0.910801	0.919276	0.902326	0.956326	0.958793	0.953858
67	0.898809	0.907151	0.890466	0.943832	0.946278	0.941385
68	0.885588	0.893788	0.877388	0.930451	0.932877	0.928026
69	0.871321	0.87937	0.863272	0.916389	0.918793	0.913984
70	0.856189	0.864082	0.848297	0.901812	0.904197	0.899428
71	0.840321	0.848056	0.832586	0.886933	0.889299	0.884566
72	0.824005	0.831585	0.816425	0.871915	0.874266	0.869565
73	0.807344	0.814772	0.799916	0.856961	0.859297	0.854626
74	0.79056	0.797844	0.783277	0.842236	0.84456	0.839912
75	0.773824	0.780972	0.766676	0.827933	0.830248	0.825618
76	0.757344	0.764367	0.750321	0.814182	0.816491	0.811874
77	0.741205	0.748114	0.734296	0.801123	0.803427	0.798819
78	0.725603	0.732411	0.718796	0.78883	0.791133	0.786527
79	0.710621	0.71734	0.703902	0.777347	0.779651	0.775043
80	0.696366	0.703008	0.689725	0.766737	0.769044	0.76443
81	0.682868	0.689444	0.676292	0.757039	0.759352	0.754727
82	0.670208	0.676729	0.663688	0.748231	0.75055	0.745912
83	0.658406	0.664882	0.651931	0.740323	0.742651	0.737996
84	0.647471	0.653908	0.641033	0.733298	0.735635	0.73096
85	0.637346	0.643753	0.63094	0.727126	0.729473	0.724778
86	0.628085	0.634468	0.621703	0.721743	0.724102	0.719384
87	0.619637	0.626	0.613275	0.717083	0.719453	0.714712
88	0.611987	0.618334	0.60564	0.713106	0.715488	0.710724
89	0.605097	0.611432	0.598762	0.709721	0.712115	0.707328
90	0.598924	0.605248	0.5926	0.706848	0.709253	0.704443
91	0.593361	0.599677	0.587044	0.704396	0.706812	0.70198
92	0.588406	0.594716	0.582096	0.702302	0.704728	0.699876
93	0.583913	0.590218	0.577608	0.700461	0.702897	0.698026
94	0.579918	0.586219	0.573616	0.698811	0.701255	0.696367
95	0.576326	0.582624	0.570029	0.697239	0.699691	0.694787
96	0.573024	0.57932	0.566728	0.695696	0.698155	0.693237
97	0.570027	0.576321	0.563732	0.69413	0.696595	0.691665
98	0.56723	0.573522	0.560937	0.692471	0.694941	0.690001
99	0.564677	0.570969	0.558386	0.690674	0.693148	0.688201
100	0.562231	0.568522	0.555941	0.688685	0.691161	0.686209
101	0.55999	0.56628	0.553701	0.686475	0.688952	0.683998
102	0.557773	0.564061	0.551485	0.684013	0.686491	0.681535
103	0.5556	0.561886	0.549315	0.68127	0.683747	0.678793
104	0.553432	0.559715	0.54715	0.678238	0.680713	0.675762
105	0.551295	0.557572	0.545017	0.674935	0.677409	0.672462
106	0.549096	0.555368	0.542824	0.671348	0.673818	0.668878
107	0.546893	0.553158	0.540627	0.667481	0.669947	0.665015
108	0.544702	0.55096	0.538443	0.663369	0.66583	0.660908
109	0.542479	0.548729	0.536229	0.659021	0.661477	0.656566
110	0.540221	0.546461	0.533981	0.654479	0.656928	0.652029
111	0.537896	0.544126	0.531666	0.649727	0.65217	0.647284
112	0.535593	0.541812	0.529375	0.644838	0.647273	0.642402
113	0.533264	0.539471	0.527058	0.639815	0.642242	0.637387
114	0.530938	0.537131	0.524746	0.634712	0.637131	0.632293
115	0.528605	0.534786	0.522425	0.629566	0.631976	0.627155
116	0.526324	0.532492	0.520157	0.624373	0.626774	0.621972
117	0.524081	0.530237	0.517925	0.619204	0.621595	0.616813
118	0.521895	0.52804	0.51575	0.614085	0.616466	0.611704
119	0.519788	0.525923	0.513654	0.609046	0.611417	0.606676
120	0.517722	0.523847	0.511597	0.604104	0.606464	0.601744
121	0.515725	0.521841	0.509608	0.599307	0.601657	0.596958
122	0.513892	0.520002	0.507782	0.59468	0.597019	0.592341
123	0.512113	0.518217	0.506009	0.590233	0.592562	0.587904
124	0.510499	0.516598	0.5044	0.585996	0.588315	0.583677
125	0.508987	0.515084	0.50289	0.581968	0.584278	0.579658
126	0.507579	0.513675	0.501482	0.578168	0.580469	0.575866
127	0.506285	0.512381	0.500189	0.574618	0.576912	0.572325
128	0.505155	0.511251	0.499059	0.571307	0.573593	0.569021
129	0.504133	0.51023	0.498036	0.568251	0.57053	0.565972
130	0.5032	0.509297	0.497103	0.565428	0.567702	0.563154
131	0.502321	0.50842	0.496222	0.562835	0.565104	0.560566
132	0.501575	0.507674	0.495476	0.560479	0.562745	0.558214
133	0.500895	0.506995	0.494796	0.55835	0.560612	0.556088
134	0.500293	0.506393	0.494194	0.556426	0.558685	0.554167
135	0.499734	0.505831	0.493638	0.554714	0.556971	0.552456
136	0.499227	0.505322	0.493133	0.55315	0.555406	0.550895
137	0.498762	0.504854	0.49267	0.551748	0.554002	0.549494
138	0.498339	0.504427	0.492251	0.550484	0.552737	0.548231
139	0.497943	0.504026	0.491861	0.549343	0.551595	0.54709
140	0.497555	0.503632	0.491479	0.5483	0.550552	0.546049
141	0.497216	0.503285	0.491147	0.547329	0.54958	0.545079
142	0.496885	0.502946	0.490823	0.546428	0.548677	0.544179
143	0.496594	0.502648	0.490541	0.545574	0.547822	0.543326
144	0.496351	0.502398	0.490305	0.544734	0.54698	0.542488
145	0.496127	0.502165	0.490088	0.543949	0.546193	0.541705
146	0.495939	0.501971	0.489907	0.543148	0.54539	0.540906
147	0.495744	0.501769	0.489719	0.542359	0.544598	0.540119
148	0.49561	0.501628	0.489591	0.541567	0.543804	0.539331
149	0.495509	0.501523	0.489495	0.54076	0.542994	0.538526
150	0.49546	0.50147	0.48945	0.539947	0.542178	0.537716
151	0.495435	0.501442	0.489427	0.539108	0.541335	0.53688
152	0.495414	0.501421	0.489408	0.538247	0.540472	0.536022
153	0.495406	0.501411	0.4894	0.537367	0.539589	0.535145
154	0.495431	0.501439	0.489424	0.536482	0.538701	0.534263
155	0.495454	0.501462	0.489446	0.535578	0.537795	0.533362
156	0.495461	0.501471	0.489451	0.53465	0.536864	0.532436
157	0.495455	0.501468	0.489442	0.533726	0.535937	0.531514
158	0.495373	0.501388	0.489358	0.532771	0.534981	0.530562
159	0.495277	0.501295	0.489259	0.531811	0.534019	0.529603
160	0.49511	0.50113	0.48909	0.53085	0.533057	0.528644
161	0.49487	0.500892	0.488847	0.529888	0.532093	0.527682
162	0.49458	0.500604	0.488556	0.528927	0.531132	0.526723
163	0.494248	0.500273	0.488222	0.527965	0.530169	0.525761
164	0.493793	0.499817	0.487768	0.526981	0.529184	0.524777
165	0.493319	0.499342	0.487295	0.52601	0.528212	0.523808
166	0.492696	0.498717	0.486674	0.52503	0.527232	0.522829
167	0.492056	0.498075	0.486037	0.52406	0.526261	0.521859
168	0.491386	0.497403	0.485369	0.523101	0.525301	0.520901
169	0.490723	0.496737	0.484709	0.522131	0.52433	0.519931
170	0.490055	0.496066	0.484043	0.5212	0.523398	0.519002
171	0.489416	0.495427	0.483406	0.52029	0.522486	0.518093
172	0.488782	0.494791	0.482773	0.519389	0.521584	0.517194
173	0.488207	0.494217	0.482198	0.518514	0.520707	0.516321
174	0.487704	0.493715	0.481693	0.517665	0.519856	0.515474
175	0.487293	0.493307	0.481279	0.516859	0.519048	0.51467
176	0.487034	0.493053	0.481015	0.516096	0.518283	0.51391
177	0.486853	0.492878	0.480828	0.515358	0.517542	0.513174
178	0.48686	0.492894	0.480827	0.514669	0.51685	0.512487
179	0.487008	0.493052	0.480963	0.514056	0.516236	0.511877
180	0.487263	0.493319	0.481208	0.513477	0.515655	0.5113
181	0.487669	0.493737	0.481601	0.51295	0.515125	0.510774
182	0.488226	0.494306	0.482146	0.512466	0.514639	0.510292
183	0.488907	0.494999	0.482815	0.512041	0.514213	0.509869
184	0.489706	0.495808	0.483603	0.511661	0.513831	0.509491
185	0.490641	0.496753	0.484528	0.511325	0.513494	0.509157
186	0.491724	0.497845	0.485603	0.511036	0.513203	0.508869
187	0.492902	0.499032	0.486773	0.510768	0.512934	0.508602
188	0.494152	0.500289	0.488014	0.510551	0.512715	0.508387
189	0.495543	0.501688	0.489399	0.510376	0.512539	0.508214
190	0.497033	0.503185	0.490882	0.51024	0.512401	0.508079
191	0.498535	0.504694	0.492376	0.510105	0.512264	0.507946
192	0.500118	0.506286	0.49395	0.510007	0.512165	0.50785
193	0.501732	0.50791	0.495553	0.509922	0.512078	0.507767
194	0.50336	0.509551	0.497169	0.509859	0.512012	0.507705
195	0.504998	0.511204	0.498793	0.509833	0.511985	0.507681
196	0.506664	0.512885	0.500442	0.509827	0.511978	0.507677
197	0.508268	0.514509	0.502027	0.50984	0.511989	0.507692
198	0.509862	0.516124	0.5036	0.50989	0.512037	0.507743
199	0.51147	0.517756	0.505183	0.509956	0.512102	0.50781
200	0.51299	0.519302	0.506679	0.510066	0.512211	0.507921

## Sheet: C-Top panel
Polar distance (red)	Polar angle (red)	Polar distance (blue)	Polar angle (blue)
4.272	3.5221	-0.522879	3.24631
3.7923	3.92699	-0.122879	1.22173
4.04861	3.91949	-0.922879	4.55531
4.09938	3.86571	-0.322879	6.10865
4.68491	3.96771	-0.222879	0.925025
4.64055	3.7296	-0.0228787	0.628319
12.7279	3.70907	-0.122879	5.89921
13.4391	3.71083	-0.322879	5.13127
12.2868	3.65471	0.0771213	6.03884
13.0362	3.14159	-0.422879	5.72468
10.8167	3.25354	0.177121	5.81195
10.3115	3.03179	-0.622879	4.45059
10.9808	3.07892	-0.622879	4.92183
11.2681	2.81984	0.277121	0.942478
11.4146	2.8956	-0.0228787	1.09956
11.387	2.84886	-0.122879	0.837758
11.2722	2.73653	0.177121	0.907571
10.0042	2.35619	0.277121	0.610865
10.7703	2.36206	0.0771213	0.279253
6.32456	2.3836	-0.122879	2.07694
5.7055	2.40702	0.177121	0.785398
6.81525	4.49372	0.277121	0.349066
6.2403	4.51466	-0.0228787	2.37365
6.1066	4.53777	-0.822879	2.60054
6.177	4.48787	-0.122879	1.95477
5.86978	4.35362	-0.722879	4.95674
6	4.48111	-0.522879	5.23599
6.01281	4.47385
6.25233	4.502
6.20697	4.60173
5.60977	4.57186
6.36305	4.6141
6.58515	4.71239
5.41889	4.8474
5.92684	4.81086

## Sheet: C-Bottom panel
Polar distance (red)	Polar angle (red)	Polar distance (blue)	Polar angle (blue)
5.02494	1.5708	0.222879	3.19395
4.77549	1.55869	0.222879	3.00197
5.41207	1.47113	0.422879	2.49582
5.04546	1.6092	0.177121	2.84489
5.38516	1.5658	0.522879	2.40855
5.11766	1.24905	0.722879	2.6529
5.82969	1.40314	0.322879	2.67035
5.5411	1.36593	0.522879	2.89725
6.08276	1.40565	0.222879	2.96706
6.60788	1.47674	0.622879	2.0944
7.81025	1.49145	0.422879	2.72271
8.12013	1.19029	1.02288	2.54818
7.25645	1.29178	0.622879	2.14675
6.47652	1.31955	0.322879	2.26893
6.777	1.10715	0.722879	2.37365
11.1803	1.09309
11.8419	1.14952
10.8044	0.694738
11.4162	0.756738
