# Supplementary material for: Instantaneous movement-unrelated midbrain activity modifies ongoing eye movements
Source: eLife. 2021 May 6;10:e64150. doi: 10.7554/eLife.64150 (PMC8143798; doi:10.7554/eLife.64150)
Supplement: Figure 12—source data 1. [file elife-64150-fig12-data1.xlsx]

## Sheet: Panel A
Average motor response -15 to 15ms without stimulus	Average motor response -15 to 15ms with stimulus
163.778	153.781
178.816	189.86
315.829	313.803
298.991	282.16
296.069	282.777
157.87	162.242
178.533	172.178
173.332	163.938
169.344	169.354
140.027	172.848
128.17	124.309
132.242	125.503
224.057	196.611
118.039	111.618
35.6552	29.2238
40.264	21.3907
34.7774	39.8205
92.1629	96.6072
240.994	250.994
152.784	138.634
75.1033	71.0682
142.822	106.341
37.9332	23.9994
93.2146	78.8312
92.0745	78.2471
282.746	266.709
122.285	83.036
38.9592	48.9592
181.576	191.576
215.789	192.923
117.722	127.722
220.416	230.416
181.223	160.002
130.693	150.627
100.699	131.26
292.254	278.591
25.4844	16.1115
42.7591	29.9476
68.5141	78.5141
190.956	186.875
170.025	180.025
109.553	137.449

## Sheet: Panel B
	mean	s.e.m.	N
Microsaccade amplitude without visual burst	22.41 min arc	0.2266	1956
Microsaccade mplitude with visual burst	31.09 min arc	0.5821	650
t-test p-value	7.907e-27
